# Supplementary material
Source: publisher figshare collection journal article supplement (https://gsajournals.figshare.com/articles/dataset/_/7152671)
Supplement: Supplementary file 1 [file 1]

## Sheet: List of Tables
Table S5. Annotation of cell-type specific and origin-specific DMRs
S5.1 Cell-type DMRs (>20% methylation difference)
S5.2 Subset of cell-type DMRs (hypo-methylated in sperm >75% methylation difference)
S5.3 Subset of cell-type DMRs (hyper-methylated in sperm >75% methylation difference)
S5.4 Regions that are hypo-methylated in both RBCs and sperm (<25% methylation)
S5.5. Hatchery and Natural origin-specific DMRs in RBCs (>20% methylation difference)
S5.6. Hatchery and Natural origin-specific DMRs in sperm (>20% methylation difference)
S5.7 Common origin-specific DMRs between RBCs and sperm

## Sheet: S5.1 tDMRs >20% meth diff.
scaffold	start	stop	Chr	pvalue	qvalue	meth.diff	CG_in_tile	island_annot	dist to closest gene	O.my gene ID	UniProt ID	UniProt Full Name	E-value	Repeat Description
scaffold_1	115901	116000	chrUn_26	0	0	20.2862	2	open sea	.	.	.	.	.	.
scaffold_1	349301	349400	chrUn_26	0	0	29.8783	3	shelf	2829	GSONMT00064036001	LARG2_DANRE	Glycosyltransferase-like protein LARGE2	0	.
scaffold_1	746401	746500	chrUn_26	0	0	23.8775	3	open sea	-67	GSONMT00064041001	KIFC3_HUMAN	Kinesin-like protein KIFC3	1e-11	.
scaffold_1	818401	818500	chrUn_26	0	0	21.571	1	open sea	-5493	GSONMT00064047001	TM208_DANRE	Transmembrane protein 208	1e-82	.
scaffold_1	1006101	1006200	chrUn_26	0	0	22.8166	1	open sea	0	GSONMT00064051001	NAV2_HUMAN	Neuron navigator 2	2e-90	.
scaffold_1	1060701	1060800	chrUn_26	0	0	19.8763	6	shore	.	.	.	.	.	.
scaffold_1	1211701	1211800	chrUn_26	0	0	20.1076	3	open sea	.	.	.	.	.	.
scaffold_1	1347501	1347600	chrUn_26	0	0	19.9091	3	open sea	0	GSONMT00064058001	ZDH13_MACFA	Palmitoyltransferase ZDHHC13	0	.
scaffold_1	1614801	1614900	chrUn_26	0	0	22.9498	4	open sea	.	.	.	.	.	.
scaffold_1	2299701	2299800	chrUn_26	0	0	39.7157	4	open sea	0	GSONMT00064089001	AMRA1_HUMAN	Activating molecule in BECN1-regulated autophagy protein 1	6e-57	.
scaffold_1	2299801	2299900	chrUn_26	0	0	21.4164	6	open sea	0	GSONMT00064089001	AMRA1_HUMAN	Activating molecule in BECN1-regulated autophagy protein 1	6e-57	.
scaffold_1	2608401	2608500	chrUn_26	0	0	51.6367	2	shore	.	.	.	.	.	.
scaffold_1	2626301	2626400	chrUn_26	0	0	29.2183	4	open sea	.	.	.	.	.	.
scaffold_1	3782901	3783000	chrUn_26	0	0	75.6862	4	shelf	0	GSONMT00064146001	CAD11_CHICK	Cadherin-11	0	.
scaffold_1	4842001	4842100	chrUn_26	0	0	21.1885	2	open sea	0	GSONMT00064175001	MYLK3_DANRE	Myosin light chain kinase 3	0	.
scaffold_1	5104001	5104100	chrUn_26	0	0	20.4043	4	shore	.	.	.	.	.	.
scaffold_10	190201	190300	chrUn_7	0	0	-28.1759	4	island	3769	GSONMT00064203001	CP27B_HUMAN	25-hydroxyvitamin D-1 alpha hydroxylase, mitochondrial	9e-174	.
scaffold_10	190401	190500	chrUn_7	0	0	-34.5275	6	shore	3569	GSONMT00064203001	CP27B_HUMAN	25-hydroxyvitamin D-1 alpha hydroxylase, mitochondrial	9e-174	.
scaffold_10	593001	593100	chrUn_7	0	0	20.9444	5	open sea	.	.	.	.	.	ID=RM582633;Name=RM582633;Note=Motif:REX1-1_AFC
scaffold_10	3112001	3112100	chrUn_7	0	0	37.7967	4	shore	.	.	.	.	.	ID=RM584634;Name=RM584634;Note=Motif:Gypsy-35_GA-I-int
scaffold_10	3270001	3270100	chrUn_7	0	0	26.6922	2	open sea	.	.	.	.	.	.
scaffold_100	100801	100900	chrUn_17	0	0	21.9788	5	open sea	.	.	.	.	.	.
scaffold_100	363601	363700	chrUn_17	0	0	24.7318	3	shelf	0	GSONMT00064338001	GNAI2_CANFA	Guanine nucleotide-binding protein G(i) subunit alpha-2	0	.
scaffold_100	813501	813600	chrUn_17	0	0	20.985	3	open sea	.	.	.	.	.	.
scaffold_100	827301	827400	chrUn_17	0	0	19.9293	2	shore	.	.	.	.	.	.
scaffold_100	873301	873400	chrUn_17	0	0	21.7975	3	open sea	0	GSONMT00064355001	POL_BAEVM	Pol polyprotein	2e-19	.
scaffold_100	1358001	1358100	chrUn_17	0	0	30.8084	3	open sea	.	.	.	.	.	.
scaffold_100	1702801	1702900	chrUn_17	0	0	33.2945	2	shore	.	.	.	.	.	.
scaffold_10003	5901	6000	chrUn	0	0	71.1029	9	island	0	GSONMT00000658001	GAS1_MOUSE	Growth arrest-specific protein 1	1e-61	.
scaffold_10003	6001	6100	chrUn	0	0	54.8785	7	island	0	GSONMT00000658001	GAS1_MOUSE	Growth arrest-specific protein 1	1e-61	.
scaffold_1002	238401	238500	chrUn_9	0	0	24.013	4	open sea	-8066	GSONMT00007959001	SSR1_HUMAN	Somatostatin receptor type 1	2e-163	.
scaffold_1002	238501	238600	chrUn_9	0	0	42.783	5	open sea	-8166	GSONMT00007959001	SSR1_HUMAN	Somatostatin receptor type 1	2e-163	.
scaffold_1002	351901	352000	chrUn_9	0	0	24.1322	5	open sea	.	.	.	.	.	.
scaffold_1003	70301	70400	chrUn_Sex	0	0	49.2138	8	island	0	GSONMT00032488001	GBRB4_CHICK	Gamma-aminobutyric acid receptor subunit beta-4	0	.
scaffold_1004	376101	376200	chrUn_17	0	0	27.2348	3	open sea	.	.	.	.	.	.
scaffold_10042	20101	20200	chrUn	0	0	20.9474	2	open sea	.	.	.	.	.	.
scaffold_10047	4801	4900	chrUn	0	0	23.5138	1	open sea	.	.	.	.	.	.
scaffold_1005	296801	296900	chrUn_12	0	0	20.8866	2	open sea	.	.	.	.	.	.
scaffold_10052	19501	19600	chrUn	0	0	20.6932	2	open sea	.	.	.	.	.	.
scaffold_1006	295501	295600	chrUn_27	0	0	31.1901	1	shore	-8082	GSONMT00020435001	WSCD1_XENTR	WSC domain-containing protein 1	0	.
scaffold_1006	377701	377800	chrUn_27	0	0	38.4356	4	shore	.	.	.	.	.	.
scaffold_1007	15301	15400	chrUn_22	0	0	29.5657	4	open sea	9896	GSONMT00009273001	H6ST3_DANRE	Heparan-sulfate 6-O-sulfotransferase 3	1e-99	.
scaffold_10075	16301	16400	chrUn	0	0	28.4834	5	island	1459	GSONMT00018714001	PCSK5_HUMAN	Proprotein convertase subtilisin/kexin type 5	0	.
scaffold_1013	168601	168700	chrUn_13	0	0	22.3466	2	open sea	-3813	GSONMT00029227001	UTP18_MOUSE	U3 small nucleolar RNA-associated protein 18 homolog	0	.
scaffold_1013	288201	288300	chrUn_13	0	0	46.1332	4	open sea	-5456	GSONMT00029234001	LGI2_HUMAN	Leucine-rich repeat LGI family member 2	1e-37	.
scaffold_10145	6601	6700	chrUn	0	0	20.782	7	open sea	0	GSONMT00007417001	NU1M_ONCMY	NADH-ubiquinone oxidoreductase chain 1	2e-44	.
scaffold_1015	23401	23500	chrUn_16	0	0	32.6537	3	shore	.	.	.	.	.	ID=RM594091;Name=RM594091;Note=Motif:Ronin1_I-int
scaffold_1015	359401	359500	chrUn_16	0	0	20.0979	3	shore	.	.	.	.	.	.
scaffold_1018	26801	26900	chrUn_8	0	0	56.4012	4	open sea	-5814	GSONMT00009937001	TTC19_DANRE	Tetratricopeptide repeat protein 19, mitochondrial	4e-154	.
scaffold_102	752701	752800	chrUn_23	0	0	23.4338	1	open sea	0	GSONMT00064459001	SRBS1_MOUSE	Sorbin and SH3 domain-containing protein 1	5e-112	.
scaffold_102	1009901	1010000	chrUn_23	0	0	49.5245	5	open sea	.	.	.	.	.	.
scaffold_1021	174901	175000	chrUn_8	0	0	25.9333	10	island	0	GSONMT00028106001	T151B_DANRE	Transmembrane protein 151B	0	.
scaffold_1021	175101	175200	chrUn_8	0	0	35.5444	9	island	0	GSONMT00028106001	T151B_DANRE	Transmembrane protein 151B	0	.
scaffold_1021	175201	175300	chrUn_8	0	0	41.1701	9	island	0	GSONMT00028106001	T151B_DANRE	Transmembrane protein 151B	0	.
scaffold_1022	323801	323900	chrUn	0	0	20.9653	3	shore	.	.	.	.	.	ID=RM598748;Name=RM598748;Note=Motif:Gypsy-10_GA-I-int
scaffold_10220	16201	16300	chrUn	0	0	20.3043	3	open sea	.	.	.	.	.	ID=RM598800;Name=RM598800;Note=Motif:REX1-1_AFC
scaffold_10223	17101	17200	chrUn	0	0	48.8982	4	open sea	0	GSONMT00057833001	BN3D2_DANRE	Pre-miRNA 5'-monophosphate methyltransferase	9e-117	.
scaffold_10236	4101	4200	chrUn	0	0	21.4908	3	open sea	.	.	.	.	.	.
scaffold_1024	167701	167800	chrUn	0	0	22.3576	1	open sea	0	GSONMT00024292001	NADL2_HUMAN	Inactive N-acetylated-alpha-linked acidic dipeptidase-like protein 2	8e-154	.
scaffold_1024	367201	367300	chrUn	0	0	31.6175	1	open sea	.	.	.	.	.	ID=RM599747;Name=RM599747;Note=Motif:TZF28C
scaffold_10252	2601	2700	chrUn	0	0	24.8462	4	shore	0	GSONMT00004154001	ANK2_MOUSE	Ankyrin-2	8e-19	.
scaffold_1026	2501	2600	chrUn_9	0	0	21.6175	6	open sea	7440	GSONMT00035663001	MIP_LITPI	Lens fiber major intrinsic protein	6e-111	.
scaffold_1027	56201	56300	chrUn_20	0	0	32.0813	6	island	.	.	.	.	.	ID=RM600939;Name=RM600939;Note=Motif:CR1-40_DR
scaffold_10277	201	300	chrUn	0	0	24.6069	5	shore	.	.	.	.	.	.
scaffold_1028	128601	128700	chrUn_22	0	0	53.0886	4	shore	.	.	.	.	.	.
scaffold_1029	11201	11300	chrUn_Sex	0	0	20.2421	6	island	.	.	.	.	.	.
scaffold_103	435301	435400	chrUn_9	0	0	60.1781	6	shelf	.	.	.	.	.	.
scaffold_103	738901	739000	chrUn_9	0	0	66.6885	3	shore	0	GSONMT00064521001	SUH_XENLA	Suppressor of hairless protein homolog	0	.
scaffold_103	1042701	1042800	chrUn_9	0	0	22.8375	3	open sea	.	.	.	.	.	.
scaffold_1030	287801	287900	chrUn_8	0	0	20.2358	3	shore	0	GSONMT00007277001	CAH4_HUMAN	Carbonic anhydrase 4	2e-41	.
scaffold_1030	368301	368400	chrUn_8	0	0	26.3834	4	open sea	.	.	.	.	.	.
scaffold_10342	3201	3300	chrUn	0	0	90.2735	4	shore	.	.	.	.	.	.
scaffold_10348	6201	6300	chrUn	0	0	20.1159	3	shore	.	.	.	.	.	ID=RM605912;Name=RM605912;Note=Motif:REX1-1_AFC
scaffold_1035	27701	27800	chrUn_11	0	0	31.2288	5	island	0	GSONMT00018484001	EFNA5_HUMAN	Ephrin-A5	1e-83	.
scaffold_1035	52301	52400	chrUn_11	0	0	27.8779	3	island	.	.	.	.	.	.
scaffold_10361	2301	2400	chrUn_13	0	0	19.9084	3	open sea	0	GSONMT00054926001	SRCN1_RAT	SRC kinase signaling inhibitor 1	1e-55	.
scaffold_10382	20401	20500	chrUn	0	0	24.2972	4	shore	-1897	GSONMT00005281001	.	.	.	.
scaffold_1039	101701	101800	chrUn	0	0	23.0059	3	shore	.	.	.	.	.	.
scaffold_1039	158901	159000	chrUn	0	0	23.3164	3	open sea	.	.	.	.	.	.
scaffold_1039	160501	160600	chrUn	0	0	20.2606	3	open sea	.	.	.	.	.	ID=RM607852;Name=RM607852;Note=Motif:CR1-24_DR
scaffold_104	569801	569900	chrUn_1	0	0	23.4469	4	shelf	3732	GSONMT00064565001	FGF8_CHICK	Fibroblast growth factor 8	1e-107	.
scaffold_104	622601	622700	chrUn_1	0	0	30.3022	7	island	.	.	.	.	.	.
scaffold_104	875301	875400	chrUn_1	0	0	48.007	2	open sea	.	.	.	.	.	.
scaffold_104	1090301	1090400	chrUn_1	0	0	23.7994	6	open sea	0	GSONMT00064576001	LDB3_HUMAN	LIM domain-binding protein 3	1e-57	.
scaffold_104	1204301	1204400	chrUn_1	0	0	28.1546	4	open sea	0	GSONMT00064583001	MMRN2_HUMAN	Multimerin-2	3e-23	.
scaffold_10400	6901	7000	chrUn	0	0	22.8235	4	shore	.	.	.	.	.	ID=RM609513;Name=RM609513;Note=Motif:UnaL2
scaffold_10420	19601	19700	chrUn	0	0	20.1085	2	shore	.	.	.	.	.	.
scaffold_10430	13301	13400	chrUn	0	0	20.0205	6	island	0	GSONMT00038216001	UNC5D_MOUSE	Netrin receptor UNC5D	5e-123	.
scaffold_1046	121501	121600	chrUn_29	0	0	23.16	2	open sea	-9573	GSONMT00056269001	ACOT1_MOUSE	Acyl-coenzyme A thioesterase 1	3e-44	.
scaffold_1046	132201	132300	chrUn_29	0	0	19.7685	2	shelf	0	GSONMT00056269001	ACOT1_MOUSE	Acyl-coenzyme A thioesterase 1	3e-44	.
scaffold_1046	196801	196900	chrUn_29	0	0	22.0371	2	open sea	0	GSONMT00056271001	KBTBD_MOUSE	Kelch repeat and BTB domain-containing protein 13	4e-148	.
scaffold_10461	1101	1200	chrUn_26	0	0	21.7117	4	open sea	.	.	.	.	.	.
scaffold_10466	5201	5300	chrUn	0	0	21.5099	3	open sea	.	.	.	.	.	.
scaffold_1047	9001	9100	chrUn	0	0	41.8717	8	island	.	.	.	.	.	.
scaffold_1048	34301	34400	chrUn	0	0	-49.6565	5	island	0	GSONMT00037580001	GP128_MOUSE	Probable G-protein coupled receptor 128	2e-115	.
scaffold_1049	501	600	chrUn	0	0	33.3336	1	open sea	.	.	.	.	.	.
scaffold_10492	7401	7500	chrUn	0	0	21.128	4	shore	.	.	.	.	.	.
scaffold_105	205701	205800	chrUn_11	0	0	21.611	10	island	2966	GSONMT00064618001	IIGP1_MOUSE	Interferon-inducible GTPase 1	8e-66	.
scaffold_105	355601	355700	chrUn_11	0	0	20.2476	3	shore	.	.	.	.	.	.
scaffold_105	1130101	1130200	chrUn_11	0	0	20.1243	1	open sea	.	.	.	.	.	ID=RM614524;Name=RM614524;Note=Motif:CR1-40_DR
scaffold_10508	9601	9700	chrUn	0	0	39.3078	4	island	.	.	.	.	.	.
scaffold_10516	19701	19800	chrUn	0	0	27.2176	2	open sea	.	.	.	.	.	.
scaffold_10521	9001	9100	chrUn	0	0	19.7976	3	open sea	1161	GSONMT00007434001	.	.	.	.
scaffold_10521	9101	9200	chrUn	0	0	29.2539	3	open sea	1061	GSONMT00007434001	.	.	.	.
scaffold_1053	240101	240200	chrUn	0	0	-73.0174	6	island	0	GSONMT00033334001	HXA3A_TAKRU	Homeobox protein Hox-A3a	0	.
scaffold_1053	240401	240500	chrUn	0	0	-65.9729	4	island	0	GSONMT00033334001	HXA3A_TAKRU	Homeobox protein Hox-A3a	0	.
scaffold_1053	240601	240700	chrUn	0	0	-75.2316	8	island	0	GSONMT00033334001	HXA3A_TAKRU	Homeobox protein Hox-A3a	0	.
scaffold_1053	248301	248400	chrUn	0	0	-67.1854	3	shore	0	GSONMT00033335001	HXA2A_TAKRU	Homeobox protein Hox-A2a	0	.
scaffold_1053	248501	248600	chrUn	0	0	-70.5259	6	island	0	GSONMT00033335001	HXA2A_TAKRU	Homeobox protein Hox-A2a	0	.
scaffold_1053	253301	253400	chrUn	0	0	-64.4038	6	shore	0	GSONMT00033336001	HXA1A_TAKRU	Homeobox protein Hox-A1a	7e-147	.
scaffold_1053	253501	253600	chrUn	0	0	-51.8031	6	shore	0	GSONMT00033336001	HXA1A_TAKRU	Homeobox protein Hox-A1a	7e-147	.
scaffold_1053	254901	255000	chrUn	0	0	-47.0787	10	shore	0	GSONMT00033336001	HXA1A_TAKRU	Homeobox protein Hox-A1a	7e-147	.
scaffold_1055	295301	295400	chrUn_19	0	0	20.4616	5	shore	.	.	.	.	.	ID=RM617500;Name=RM617500;Note=Motif:Ronin1_I-int
scaffold_1057	344201	344300	chrUn	0	0	20.6692	3	open sea	.	.	.	.	.	.
scaffold_10575	8201	8300	chrUn	0	0	31.5793	3	open sea	.	.	.	.	.	.
scaffold_10595	3401	3500	chrUn	0	0	27.7861	6	open sea	2517	GSONMT00035935001	NHLC2_BOVIN	NHL repeat-containing protein 2	6e-157	.
scaffold_106	308901	309000	chrUn_17	0	0	21.6669	4	island	.	.	.	.	.	.
scaffold_106	351101	351200	chrUn_17	0	0	21.0047	4	open sea	.	.	.	.	.	.
scaffold_106	778601	778700	chrUn_17	0	0	23.8039	6	island	-8379	GSONMT00064665001	SAMC_DANRE	S-adenosylmethionine mitochondrial carrier protein	7e-83	.
scaffold_106	1517901	1518000	chrUn_17	0	0	75.3652	2	open sea	.	.	.	.	.	.
scaffold_10625	14201	14300	chrUn	0	0	25.9984	3	open sea	-6938	GSONMT00029187001	GRM7_RAT	Metabotropic glutamate receptor 7	0	.
scaffold_1063	143601	143700	chrUn_22	0	0	-24.6409	7	island	3133	GSONMT00050495001	CO8A1_HUMAN	Collagen alpha-1(VIII) chain	1e-60	.
scaffold_10654	13501	13600	chrUn	0	0	27.6023	4	island	.	.	.	.	.	.
scaffold_10669	17901	18000	chrUn	0	0	87.0324	2	shore	.	.	.	.	.	.
scaffold_10670	16301	16400	chrUn	0	0	20.8572	3	open sea	.	.	.	.	.	ID=RM624032;Name=RM624032;Note=Motif:REX1-1_DR
scaffold_107	153001	153100	chr_14	0	0	33.9953	6	island	0	GSONMT00064687001	ANR50_HUMAN	Ankyrin repeat domain-containing protein 50	0	.
scaffold_107	209201	209300	chr_14	0	0	27.3071	1	shelf	0	GSONMT00064688001	FAT4_HUMAN	Protocadherin Fat 4	0	.
scaffold_107	353801	353900	chr_14	0	0	30.3901	2	open sea	.	.	.	.	.	.
scaffold_107	390601	390700	chr_14	0	0	27.791	1	open sea	.	.	.	.	.	.
scaffold_107	479901	480000	chr_14	0	0	25.9208	4	open sea	.	.	.	.	.	.
scaffold_107	888201	888300	chr_14	0	0	28.0687	3	open sea	0	GSONMT00064714001	TBD2A_HUMAN	TBC1 domain family member 2A	0	.
scaffold_107	1175401	1175500	chr_14	0	0	20.4571	2	open sea	.	.	.	.	.	.
scaffold_1070	169101	169200	chrUn_2	0	0	26.9042	2	open sea	.	.	.	.	.	.
scaffold_1070	169501	169600	chrUn_2	0	0	27.2891	3	open sea	.	.	.	.	.	.
scaffold_1071	80001	80100	chrUn	0	0	60.8031	10	island	0	GSONMT00051272001	M3K11_HUMAN	Mitogen-activated protein kinase kinase kinase 11	0	.
scaffold_1072	292201	292300	chrUn	0	0	20.6036	3	open sea	.	.	.	.	.	.
scaffold_1072	334101	334200	chrUn	0	0	35.4214	2	open sea	.	.	.	.	.	.
scaffold_1074	261901	262000	chrUn	0	0	-40.1258	6	shore	.	.	.	.	.	.
scaffold_10773	19801	19900	chrUn	0	0	24.2537	6	island	.	.	.	.	.	.
scaffold_1079	233901	234000	chrUn	0	0	24.9403	7	open sea	.	.	.	.	.	.
scaffold_1083	70101	70200	chrUn_24	0	0	29.5411	6	shore	-2332	GSONMT00002644001	C166A_DANRE	CD166 antigen homolog A	2e-87	.
scaffold_1085	225501	225600	chrUn	0	0	22.8461	1	shore	.	.	.	.	.	ID=RM633632;Name=RM633632;Note=Motif:Gypsy1-I_GA-int
scaffold_10864	19001	19100	chrUn	0	0	23.5312	4	open sea	6490	GSONMT00035579001	NOTUM_MOUSE	Protein notum homolog	3e-17	.
scaffold_10892	4701	4800	chrUn	0	0	21.6902	3	shore	.	.	.	.	.	.
scaffold_10893	19501	19600	chrUn	0	0	32.5376	4	open sea	.	.	.	.	.	ID=RM635521;Name=RM635521;Note=Motif:DNA-N4_DR
scaffold_10893	19601	19700	chrUn	0	0	28.4223	8	open sea	.	.	.	.	.	.
scaffold_109	636801	636900	chrUn_12	0	0	21.2997	3	open sea	.	.	.	.	.	ID=RM636187;Name=RM636187;Note=Motif:REX1-1_AFC
scaffold_109	1082501	1082600	chrUn_12	0	0	31.5261	2	open sea	-8186	GSONMT00064862001	ZMAT4_BOVIN	Zinc finger matrin-type protein 4	2e-14	.
scaffold_1091	231701	231800	chrUn	0	0	20.3337	3	open sea	.	.	.	.	.	.
scaffold_10918	17101	17200	chrUn	0	0	54.9921	3	open sea	.	.	.	.	.	.
scaffold_10918	17201	17300	chrUn	0	0	40.1162	5	open sea	.	.	.	.	.	.
scaffold_1092	95901	96000	chrUn	0	0	20.9122	1	island	.	.	.	.	.	.
scaffold_10920	17501	17600	chrUn	0	0	20.1316	2	open sea	.	.	.	.	.	ID=RM637981;Name=RM637981;Note=Motif:CR1-40_DR
scaffold_10964	201	300	chrUn	0	0	28.6603	5	island	.	.	.	.	.	.
scaffold_1097	187401	187500	chrUn_20	0	0	21.6574	9	island	.	.	.	.	.	.
scaffold_1099	250601	250700	chrUn_6	0	0	23.779	3	open sea	6515	GSONMT00014472001	.	.	.	.
scaffold_11	10001	10100	chrUn_6	0	0	19.7322	4	open sea	.	.	.	.	.	.
scaffold_11	10101	10200	chrUn_6	0	0	24.7102	4	open sea	.	.	.	.	.	.
scaffold_11	2932701	2932800	chrUn_6	0	0	30.4664	3	open sea	4862	GSONMT00065003001	TCB2_CAEBR	Transposable element Tcb2 transposase	7e-29	.
scaffold_110	341601	341700	chrUn_23	0	0	22.4601	1	shelf	.	.	.	.	.	ID=RM643495;Name=RM643495;Note=Motif:Gypsy-35_GA-I-int
scaffold_110	352301	352400	chrUn_23	0	0	19.9089	1	shelf	.	.	.	.	.	ID=RM643505;Name=RM643505;Note=Motif:REX1-1_AFC
scaffold_110	777401	777500	chrUn_23	0	0	58.4247	7	open sea	8960	GSONMT00065038001	.	.	.	.
scaffold_110	777501	777600	chrUn_23	0	0	51.7938	3	open sea	9060	GSONMT00065038001	.	.	.	.
scaffold_110	777601	777700	chrUn_23	0	0	27.421	5	open sea	9160	GSONMT00065038001	.	.	.	.
scaffold_110	910801	910900	chrUn_23	0	0	27.5898	2	open sea	0	GSONMT00065044001	BMP5_HUMAN	Bone morphogenetic protein 5	0	.
scaffold_110	1340601	1340700	chrUn_23	0	0	30.8675	6	open sea	0	GSONMT00065061001	PRI2_HUMAN	DNA primase large subunit	5e-138	.
scaffold_1100	190701	190800	chrUn	0	0	61.7557	5	open sea	.	.	.	.	.	.
scaffold_1102	216001	216100	chrUn_28	0	0	29.7143	1	open sea	0	GSONMT00038525001	PARD3_HUMAN	Partitioning defective 3 homolog	0	.
scaffold_1102	216101	216200	chrUn_28	0	0	78.9272	4	open sea	0	GSONMT00038525001	PARD3_HUMAN	Partitioning defective 3 homolog	0	.
scaffold_11025	1401	1500	chrUn	0	0	19.624	3	open sea	1349	GSONMT00047366001	DPYL2_BOVIN	Dihydropyrimidinase-related protein 2	3e-131	.
scaffold_1103	330901	331000	chrUn	0	0	-36.2535	3	island	0	GSONMT00034263001	TBC30_MOUSE	TBC1 domain family member 30	6e-26	.
scaffold_1103	331001	331100	chrUn	0	0	-38.7459	8	shore	0	GSONMT00034263001	TBC30_MOUSE	TBC1 domain family member 30	6e-26	.
scaffold_11048	6401	6500	chrUn	0	0	20.782	6	shore	0	GSONMT00014803001	CADN_DROME	Neural-cadherin	5e-142	.
scaffold_1105	299901	300000	chrUn_2	0	0	26.5667	6	shelf	.	.	.	.	.	.
scaffold_1105	300001	300100	chrUn_2	0	0	19.9159	6	shelf	.	.	.	.	.	.
scaffold_11052	6601	6700	chrUn	0	0	19.7725	5	open sea	0	GSONMT00008065001	TM204_RAT	Transmembrane protein 204	4e-39	.
scaffold_1108	240001	240100	chrUn	0	0	84.619	2	open sea	0	GSONMT00047023001	KAZRN_HUMAN	Kazrin	7e-106	.
scaffold_1108	240101	240200	chrUn	0	0	93.169	3	open sea	0	GSONMT00047023001	KAZRN_HUMAN	Kazrin	7e-106	.
scaffold_1109	6501	6600	chrUn_5	0	0	23.748	8	shore	.	.	.	.	.	.
scaffold_11091	10301	10400	chrUn	0	0	37.7803	11	island	-1376	GSONMT00026505001	KDIS_HUMAN	Kinase D-interacting substrate of 220 kDa	6e-20	.
scaffold_111	170701	170800	chrUn_13	0	0	22.5758	6	open sea	.	.	.	.	.	.
scaffold_111	239701	239800	chrUn_13	0	0	85.3028	3	island	0	GSONMT00065073001	IF4A3_XENTR	Eukaryotic initiation factor 4A-III	3e-179	.
scaffold_111	606201	606300	chrUn_13	0	0	21.3787	7	shore	2368	GSONMT00065085001	.	.	.	.
scaffold_111	663101	663200	chrUn_13	0	0	19.686	5	island	.	.	.	.	.	.
scaffold_1112	179801	179900	chrUn_20	0	0	49.3871	6	open sea	.	.	.	.	.	.
scaffold_1114	157301	157400	chrUn_16	0	0	26.6915	1	open sea	-996	GSONMT00006626001	CDC42_BOVIN	Cell division control protein 42 homolog	1e-131	.
scaffold_1116	236701	236800	chrUn_20	0	0	37.3379	3	shore	0	GSONMT00019067001	MYCD_HUMAN	Myocardin	4e-113	.
scaffold_1116	236801	236900	chrUn_20	0	0	51.6077	3	shore	0	GSONMT00019067001	MYCD_HUMAN	Myocardin	4e-113	.
scaffold_1118	78701	78800	chrUn	0	0	-67.8935	6	shore	0	GSONMT00027096001	PROC_CANFA	Vitamin K-dependent protein C	5e-114	.
scaffold_112	241601	241700	chrUn	0	0	19.7601	3	open sea	0	GSONMT00065138001	URIC_RABIT	Uricase	3e-146	.
scaffold_112	408001	408100	chrUn	0	0	42.9039	3	open sea	0	GSONMT00065150001	LPAR3_MOUSE	Lysophosphatidic acid receptor 3	4e-120	.
scaffold_112	648001	648100	chrUn	0	0	24.9983	2	open sea	.	.	.	.	.	.
scaffold_112	755401	755500	chrUn	0	0	24.4114	3	shore	.	.	.	.	.	.
scaffold_112	779701	779800	chrUn	0	0	23.5956	6	island	.	.	.	.	.	.
scaffold_112	1074001	1074100	chrUn	0	0	26.999	3	open sea	.	.	.	.	.	.
scaffold_112	1123801	1123900	chrUn	0	0	24.4865	3	open sea	.	.	.	.	.	ID=RM654758;Name=RM654758;Note=Motif:Ronin1_I-int
scaffold_112	1138201	1138300	chrUn	0	0	29.6915	3	shore	.	.	.	.	.	ID=RM654776;Name=RM654776;Note=Motif:Gypsy-10_GA-I-int
scaffold_112	1293501	1293600	chrUn	0	0	31.5059	2	shelf	.	.	.	.	.	.
scaffold_112	1401101	1401200	chrUn	0	0	24.1717	4	shore	.	.	.	.	.	ID=RM655011;Name=RM655011;Note=Motif:Gypsy-10_GA-I-int
scaffold_1121	151001	151100	chrUn_2	0	0	38.8003	3	open sea	.	.	.	.	.	.
scaffold_1122	81001	81100	chrUn	0	0	-24.9264	8	open sea	169	GSONMT00047157001	CENPT_CHICK	Centromere protein T	9e-34	.
scaffold_1123	256201	256300	chrUn_28	0	0	69.2611	4	shore	.	.	.	.	.	.
scaffold_1123	285801	285900	chrUn_28	0	0	22.5218	2	open sea	.	.	.	.	.	.
scaffold_1125	128001	128100	chr_27	0	0	32.606	8	shelf	0	GSONMT00011969001	PHF13_MOUSE	PHD finger protein 13	1e-34	.
scaffold_1128	173601	173700	chrUn_10	0	0	23.6931	5	shore	0	GSONMT00042253001	PCDGM_HUMAN	Protocadherin gamma-C5	0	.
scaffold_1129	75101	75200	chrUn_5	0	0	29.7304	3	open sea	0	GSONMT00015092001	RGS3_MOUSE	Regulator of G-protein signaling 3	1e-34	.
scaffold_1129	77501	77600	chrUn_5	0	0	44.9455	3	open sea	0	GSONMT00015092001	RGS3_MOUSE	Regulator of G-protein signaling 3	1e-34	.
scaffold_1129	77601	77700	chrUn_5	0	0	75.4834	7	open sea	0	GSONMT00015092001	RGS3_MOUSE	Regulator of G-protein signaling 3	1e-34	.
scaffold_1129	77701	77800	chrUn_5	0	0	88.8516	3	open sea	-20	GSONMT00015092001	RGS3_MOUSE	Regulator of G-protein signaling 3	1e-34	.
scaffold_113	210901	211000	chrUn_16	0	0	22.7778	2	open sea	.	.	.	.	.	.
scaffold_113	795701	795800	chrUn_16	0	0	-40.6566	4	shore	-302	GSONMT00065195001	5HT7R_MOUSE	5-hydroxytryptamine receptor 7	0	.
scaffold_113	795801	795900	chrUn_16	0	0	-36.8882	3	shore	-202	GSONMT00065195001	5HT7R_MOUSE	5-hydroxytryptamine receptor 7	0	.
scaffold_113	1319201	1319300	chrUn_16	0	0	-28.6099	13	open sea	.	.	.	.	.	.
scaffold_113	1419901	1420000	chrUn_16	0	0	20.0747	3	shore	.	.	.	.	.	ID=RM660312;Name=RM660312;Note=Motif:Ronin1_I-int
scaffold_113	1478601	1478700	chrUn_16	0	0	23.1987	4	shore	.	.	.	.	.	.
scaffold_113	1509701	1509800	chrUn_16	0	0	31.8784	7	open sea	.	.	.	.	.	.
scaffold_1130	150501	150600	chrUn	0	0	19.6383	6	shore	.	.	.	.	.	ID=RM660563;Name=RM660563;Note=Motif:Gypsy79-I_DR-int
scaffold_1130	154401	154500	chrUn	0	0	26.6263	4	shelf	.	.	.	.	.	.
scaffold_1130	167201	167300	chrUn	0	0	24.1356	7	open sea	-4153	GSONMT00053245001	MMP11_XENLA	Stromelysin-3	2e-174	.
scaffold_11327	9901	10000	chrUn	0	0	22.1455	3	open sea	-2987	GSONMT00060749001	KLK9_HUMAN	Kallikrein-9	2e-12	.
scaffold_1133	42501	42600	chr_18	0	0	29.1836	3	open sea	.	.	.	.	.	.
scaffold_1133	42601	42700	chr_18	0	0	31.6702	3	open sea	.	.	.	.	.	.
scaffold_1134	261001	261100	chrUn_11	0	0	25.6724	7	island	.	.	.	.	.	.
scaffold_1135	93501	93600	chrUn_5	0	0	37.342	2	open sea	.	.	.	.	.	.
scaffold_1137	118501	118600	chrUn_7	0	0	23.1304	6	island	.	.	.	.	.	.
scaffold_11374	6801	6900	chrUn	0	0	-27.8501	7	island	.	.	.	.	.	.
scaffold_1138	3501	3600	chrUn	0	0	20.3323	3	open sea	.	.	.	.	.	.
scaffold_1138	104001	104100	chrUn	0	0	21.0321	3	shore	.	.	.	.	.	ID=RM663863;Name=RM663863;Note=Motif:Gypsy-35_GA-I-int
scaffold_1138	297701	297800	chrUn	0	0	20.8899	2	open sea	.	.	.	.	.	ID=RM664012;Name=RM664012;Note=Motif:TZF28B
scaffold_114	1393301	1393400	chrUn_6	0	0	29.6325	3	shore	0	GSONMT00065293001	NELL2_DANRE	Protein kinase C-binding protein NELL2	0	.
scaffold_114	1466501	1466600	chrUn_6	0	0	21.2283	3	shore	.	.	.	.	.	ID=RM665451;Name=RM665451;Note=Motif:REX1-1_AFC
scaffold_1140	178701	178800	chrUn_18	0	0	25.6163	3	shore	.	.	.	.	.	ID=RM665754;Name=RM665754;Note=Motif:Gypsy-28-I_DR-int
scaffold_11425	15801	15900	chrUn	0	0	19.5183	2	shelf	.	.	.	.	.	.
scaffold_1143	256501	256600	chrUn	0	0	38.172	6	open sea	0	GSONMT00007713001	DYH1_HUMAN	Dynein heavy chain 1, axonemal	0	.
scaffold_11439	14801	14900	chrUn	0	0	25.9082	4	shelf	.	.	.	.	.	.
scaffold_1145	152701	152800	chrUn_14	0	0	36.9271	4	open sea	.	.	.	.	.	.
scaffold_11459	6501	6600	chrUn	0	0	89.3184	3	open sea	.	.	.	.	.	.
scaffold_11464	16901	17000	chrUn	0	0	38.1609	1	open sea	.	.	.	.	.	.
scaffold_11470	1001	1100	chrUn_16	0	0	96.464	2	open sea	0	GSONMT00025226001	CG062_RAT	Uncharacterized protein C7orf62 homolog	4e-29	.
scaffold_1148	287901	288000	chrUn_21	0	0	23.3877	4	open sea	.	.	.	.	.	.
scaffold_115	951701	951800	chrUn_4	0	0	22.8932	4	open sea	.	.	.	.	.	ID=RM670648;Name=RM670648;Note=Motif:CR1-40_DR
scaffold_115	1092801	1092900	chrUn_4	0	0	43.5502	4	open sea	371	GSONMT00065332001	EXOC2_HUMAN	Exocyst complex component 2	0	.
scaffold_115	1183301	1183400	chrUn_4	0	0	23.762	2	island	0	GSONMT00065336001	DESP_HUMAN	Desmoplakin	3e-94	.
scaffold_1150	90201	90300	chrUn	0	0	19.5763	1	open sea	.	.	.	.	.	ID=RM671344;Name=RM671344;Note=Motif:REX1-1_AFC
scaffold_1150	197101	197200	chrUn	0	0	20.7217	2	open sea	.	.	.	.	.	ID=RM671445;Name=RM671445;Note=Motif:CR1-40_DR
scaffold_11513	2601	2700	chrUn	0	0	27.7138	4	open sea	0	GSONMT00055378001	CAN5_MOUSE	Calpain-5	0	.
scaffold_1152	179101	179200	chrUn	0	0	26.2679	4	shelf	0	GSONMT00047199001	MBOA2_CHICK	Membrane-bound O-acyltransferase domain-containing protein 2	0	.
scaffold_11538	17301	17400	chrUn	0	0	29.8358	5	shore	.	.	.	.	.	.
scaffold_1155	47901	48000	chrUn_29	0	0	26.4741	5	open sea	.	.	.	.	.	.
scaffold_1155	48001	48100	chrUn_29	0	0	20.9531	4	open sea	.	.	.	.	.	.
scaffold_1155	244201	244300	chrUn_29	0	0	26.8186	8	open sea	.	.	.	.	.	.
scaffold_1155	244301	244400	chrUn_29	0	0	27.8741	2	open sea	.	.	.	.	.	.
scaffold_1155	298101	298200	chrUn_29	0	0	19.566	2	open sea	.	.	.	.	.	.
scaffold_1156	177801	177900	chrUn_17	0	0	19.9022	3	open sea	0	GSONMT00061433001	PAX7_HUMAN	Paired box protein Pax-7	7e-161	.
scaffold_116	423901	424000	chrUn_7	0	0	23.2376	1	open sea	0	GSONMT00065385001	SULF2_HUMAN	Extracellular sulfatase Sulf-2	0	.
scaffold_116	1182701	1182800	chrUn_7	0	0	-34.3769	5	island	-1157	GSONMT00065408001	L14BB_XENLA	Protein LSM14 homolog B-B	1e-104	.
scaffold_116	1537501	1537600	chrUn_7	0	0	20.9713	5	shore	-2404	GSONMT00065435001	TADA3_DANRE	Transcriptional adapter 3	0	.
scaffold_116	1537601	1537700	chrUn_7	0	0	27.0044	5	island	-2304	GSONMT00065435001	TADA3_DANRE	Transcriptional adapter 3	0	.
scaffold_116	1581601	1581700	chrUn_7	0	0	-51.4502	3	open sea	-6248	GSONMT00065441001	GATA2_CHICK	GATA-binding factor 2	6e-152	.
scaffold_116	1590401	1590500	chrUn_7	0	0	-62.8385	7	open sea	0	GSONMT00065441001	GATA2_CHICK	GATA-binding factor 2	6e-152	.
scaffold_1162	11301	11400	chrUn_10	0	0	28.308	2	open sea	.	.	.	.	.	.
scaffold_11641	6301	6400	chrUn	0	0	21.4604	3	open sea	.	.	.	.	.	.
scaffold_11669	801	900	chrUn	0	0	19.5822	6	island	.	.	.	.	.	ID=RM679238;Name=RM679238;Note=Motif:TC1_FR3
scaffold_11669	7701	7800	chrUn	0	0	20.158	6	open sea	.	.	.	.	.	.
scaffold_11669	7801	7900	chrUn	0	0	52.1433	2	open sea	.	.	.	.	.	.
scaffold_1167	46901	47000	chrUn_12	0	0	20.4184	4	open sea	0	GSONMT00030170001	.	.	.	.
scaffold_117	608201	608300	chrUn_20	0	0	42.699	3	shelf	-1337	GSONMT00065464001	ACTA_RAT	Actin, aortic smooth muscle	0	.
scaffold_117	1583501	1583600	chrUn_20	5.89e-13	3.55e-14	21.2489	1	open sea	.	.	.	.	.	.
scaffold_11724	1	100	chrUn	0	0	25.4428	6	open sea	-9506	GSONMT00008103001	NPBW1_MOUSE	Neuropeptides B/W receptor type 1	5e-143	.
scaffold_1174	78301	78400	chrUn	0	0	21.9228	8	open sea	-6552	GSONMT00012959001	PDE4D_HUMAN	cAMP-specific 3',5'-cyclic phosphodiesterase 4D	3e-122	.
scaffold_1174	287501	287600	chrUn	0	0	30.0488	4	open sea	0	GSONMT00012964001	NRG1_RAT	Pro-neuregulin-1, membrane-bound isoform	4e-20	.
scaffold_1179	242601	242700	chrUn	0	0	20.3933	5	open sea	2157	GSONMT00040494001	DLG4_DANRE	Disks large homolog 4	6e-26	.
scaffold_118	82701	82800	chr_1	0	0	42.936	6	open sea	-134	GSONMT00065513001	LIPB2_HUMAN	Liprin-beta-2	1e-31	.
scaffold_118	128401	128500	chr_1	0	0	86.2052	4	open sea	-2444	GSONMT00065515001	NB5R2_DANRE	NADH-cytochrome b5 reductase 2	9e-161	.
scaffold_118	128501	128600	chr_1	0	0	59.508	2	open sea	-2544	GSONMT00065515001	NB5R2_DANRE	NADH-cytochrome b5 reductase 2	9e-161	.
scaffold_118	610801	610900	chr_1	0	0	20.1082	3	shore	-1627	GSONMT00065538001	GLT18_HUMAN	Polypeptide N-acetylgalactosaminyltransferase 18	0	.
scaffold_118	1007601	1007700	chr_1	0	0	23.9242	3	open sea	.	.	.	.	.	.
scaffold_118	1057001	1057100	chr_1	0	0	56.3801	3	open sea	.	.	.	.	.	.
scaffold_118	1057201	1057300	chr_1	0	0	64.3608	4	open sea	.	.	.	.	.	.
scaffold_118	1085901	1086000	chr_1	0	0	86.5122	4	island	.	.	.	.	.	.
scaffold_118	1345501	1345600	chr_1	0	0	22.9485	4	open sea	0	GSONMT00065576001	CECR2_HUMAN	Cat eye syndrome critical region protein 2	4e-160	.
scaffold_118	1537401	1537500	chr_1	0	0	92.2723	1	open sea	0	GSONMT00065583001	FGD4_HUMAN	FYVE, RhoGEF and PH domain-containing protein 4	2e-150	.
scaffold_118	1537501	1537600	chr_1	0	0	82.3189	2	open sea	0	GSONMT00065583001	FGD4_HUMAN	FYVE, RhoGEF and PH domain-containing protein 4	2e-150	.
scaffold_1181	9201	9300	chrUn_4	0	0	-19.8393	6	open sea	7488	GSONMT00023818001	CBPB1_PIG	Carboxypeptidase B	2e-43	.
scaffold_11840	12601	12700	chrUn	0	0	21.0095	6	island	.	.	.	.	.	.
scaffold_1185	153001	153100	chrUn_11	0	0	20.8762	3	shore	-4431	GSONMT00063412001	.	.	.	.
scaffold_11855	10201	10300	chrUn	0	0	19.8536	5	island	0	GSONMT00007640001	EGR3_HUMAN	Early growth response protein 3	6e-44	.
scaffold_11862	6701	6800	chrUn	0	0	58.6275	3	open sea	0	GSONMT00008014001	ZFHX4_CHICK	Zinc finger homeobox protein 4	1e-92	.
scaffold_11862	14701	14800	chrUn	0	0	44.3332	2	shore	0	GSONMT00008015001	ZFHX4_CHICK	Zinc finger homeobox protein 4	0	.
scaffold_1187	85501	85600	chrUn_21	0	0	20.418	3	open sea	0	GSONMT00040189001	DEFI6_DANRE	Differentially expressed in FDCP 6 homolog	5e-134	.
scaffold_1188	243401	243500	chrUn_19	3.83e-05	1.9e-06	-20.0984	6	shore	.	.	.	.	.	.
scaffold_11881	9901	10000	chrUn	0	0	28.9149	4	shore	0	GSONMT00042107001	EXT1_HUMAN	Exostosin-1	2e-178	.
scaffold_119	678101	678200	chrUn_17	0	0	25.2597	2	open sea	.	.	.	.	.	.
scaffold_119	899201	899300	chrUn_17	0	0	20.9177	4	shore	0	GSONMT00065612001	FXP1B_DANRE	Forkhead box protein P1-B	0	.
scaffold_119	1539901	1540000	chrUn_17	0	0	36.451	5	open sea	7184	GSONMT00065637001	PZRN3_MOUSE	E3 ubiquitin-protein ligase PDZRN3	4e-133	.
scaffold_1190	297001	297100	chrUn_24	0	0	38.7069	6	shore	0	GSONMT00021671001	ULK2_HUMAN	Serine/threonine-protein kinase ULK2	3e-85	.
scaffold_11910	7201	7300	chrUn	0	0	40.7015	7	shelf	.	.	.	.	.	ID=RM692381;Name=RM692381;Note=Motif:TC1_TF
scaffold_11917	2301	2400	chrUn	0	0	42.9848	4	open sea	.	.	.	.	.	.
scaffold_11918	11501	11600	chrUn_8	0	0	33.6986	5	open sea	.	.	.	.	.	.
scaffold_11918	11701	11800	chrUn_8	0	0	32.3192	4	open sea	.	.	.	.	.	.
scaffold_11918	11801	11900	chrUn_8	0	0	53.8769	2	open sea	.	.	.	.	.	.
scaffold_1193	194901	195000	chrUn	0	0	21.7734	1	open sea	0	GSONMT00043436001	LIPB2_HUMAN	Liprin-beta-2	1e-86	.
scaffold_11946	17401	17500	chrUn	0	0	27.2473	5	shore	.	.	.	.	.	.
scaffold_1196	120501	120600	chrUn	0	0	80.8243	2	open sea	.	.	.	.	.	ID=RM694120;Name=RM694120;Note=Motif:CR1-31_DR
scaffold_1196	120601	120700	chrUn	0	0	57.2006	5	open sea	.	.	.	.	.	.
scaffold_1196	151401	151500	chrUn	0	0	-19.6146	6	island	0	GSONMT00012601001	HES1B_XENLA	Transcription factor HES-1-B	5e-140	.
scaffold_1196	151501	151600	chrUn	0	0	-29.173	2	shore	0	GSONMT00012601001	HES1B_XENLA	Transcription factor HES-1-B	5e-140	.
scaffold_11962	12401	12500	chrUn	0	0	20.3435	3	open sea	.	.	.	.	.	ID=RM694257;Name=RM694257;Note=Motif:REX1-1_DR
scaffold_11977	2301	2400	chrUn	0	0	20.3974	4	open sea	.	.	.	.	.	ID=RM694695;Name=RM694695;Note=Motif:REX1-1_AFC
scaffold_1198	102301	102400	chrUn	0	0	34.9685	4	shore	3557	GSONMT00012564001	PTPRU_DANRE	Receptor-type tyrosine-protein phosphatase U	0	.
scaffold_1199	203401	203500	chr_7	0	0	60.4102	3	shelf	8180	GSONMT00044921001	CHIA_HUMAN	Acidic mammalian chitinase	6e-104	.
scaffold_12	187201	187300	chrUn_4	0	0	19.5118	5	island	0	GSONMT00065644001	KCMA1_RAT	Calcium-activated potassium channel subunit alpha-1	0	.
scaffold_12	553101	553200	chrUn_4	0	0	-61.6328	4	island	0	GSONMT00065649001	ZN503_DANRE	Zinc finger protein 503	0	.
scaffold_12	553201	553300	chrUn_4	0	0	-77.7547	5	island	0	GSONMT00065649001	ZN503_DANRE	Zinc finger protein 503	0	.
scaffold_120	718101	718200	chrUn_15	0	0	20.6706	6	island	.	.	.	.	.	ID=RM698378;Name=RM698378;Note=Motif:CR1-40_DR
scaffold_120	1326701	1326800	chrUn_15	0	0	51.6522	4	open sea	0	GSONMT00065832001	SCRIB_DANRE	Protein scribble homolog	0	.
scaffold_1200	155701	155800	chrUn	0	0	26.1883	5	island	-1113	GSONMT00054794001	CK070_XENTR	Uncharacterized protein C11orf70 homolog	2e-20	.
scaffold_1200	284101	284200	chrUn	0	0	20.3966	3	shelf	.	.	.	.	.	.
scaffold_1201	24801	24900	chrUn	0	0	36.7965	2	shore	0	GSONMT00000512001	ANM3_HUMAN	Protein arginine N-methyltransferase 3	2e-119	.
scaffold_1202	110701	110800	chrUn_9	0	0	20.4028	2	open sea	5976	GSONMT00048625001	KLH17_RAT	Kelch-like protein 17	0	.
scaffold_12030	3501	3600	chrUn	0	0	27.4157	4	shelf	0	GSONMT00058012001	P2Y10_HUMAN	Putative P2Y purinoceptor 10	2e-80	.
scaffold_12034	1201	1300	chrUn_27	0	0	28.5843	4	open sea	.	.	.	.	.	.
scaffold_1204	104601	104700	chrUn	0	0	38.2312	7	island	0	GSONMT00049175001	COPA1_HUMAN	Collagen alpha-1(XXV) chain	1e-32	.
scaffold_1204	104701	104800	chrUn	0	0	56.2279	4	island	0	GSONMT00049175001	COPA1_HUMAN	Collagen alpha-1(XXV) chain	1e-32	.
scaffold_1204	104901	105000	chrUn	0	0	36.0808	7	island	0	GSONMT00049175001	COPA1_HUMAN	Collagen alpha-1(XXV) chain	1e-32	.
scaffold_1204	137401	137500	chrUn	0	0	19.6274	9	island	-3964	GSONMT00049178001	AT2L1_DANRE	Ethanolamine-phosphate phospho-lyase	0	.
scaffold_1208	265301	265400	chrUn	0	0	20.3653	6	shore	0	GSONMT00018338001	NOTC1_XENTR	Neurogenic locus notch homolog protein 1	2e-40	.
scaffold_12084	15901	16000	chrUn	0	0	23.1702	2	open sea	.	.	.	.	.	ID=RM702473;Name=RM702473;Note=Motif:REX1-1_AFC
scaffold_12085	3301	3400	chrUn	0	0	27.5669	2	open sea	-1692	GSONMT00019211001	POL_WDSV	Gag-Pol polyprotein	3e-78	.
scaffold_1209	153401	153500	chrUn_15	0	0	21.4665	1	shore	.	.	.	.	.	ID=RM702619;Name=RM702619;Note=Motif:Ronin1_I-int
scaffold_121	689101	689200	chrUn_1	0	0	29.1219	2	open sea	.	.	.	.	.	.
scaffold_121	1026201	1026300	chrUn_1	0	0	34.4135	1	open sea	.	.	.	.	.	.
scaffold_1213	60001	60100	chrUn_21	0	0	22.8235	3	open sea	.	.	.	.	.	ID=RM705518;Name=RM705518;Note=Motif:REX1-1_AFC
scaffold_1214	21001	21100	chrUn_2	0	0	89.6256	2	open sea	.	.	.	.	.	.
scaffold_12144	3101	3200	chrUn	0	0	26.8755	5	island	.	.	.	.	.	.
scaffold_12166	1101	1200	chrUn	0	0	27.17	5	open sea	.	.	.	.	.	ID=RM706977;Name=RM706977;Note=Motif:TC1DR3
scaffold_12173	15601	15700	chrUn	0	0	23.4014	2	open sea	.	.	.	.	.	.
scaffold_1218	115101	115200	chrUn_1	0	0	19.7606	2	open sea	.	.	.	.	.	.
scaffold_12180	14501	14600	chrUn	0	0	27.8963	2	shore	.	.	.	.	.	.
scaffold_122	375101	375200	chrUn_2	0	0	24.811	2	shore	4050	GSONMT00065902001	SYT1_PONAB	Synaptotagmin-1	3e-120	.
scaffold_122	1181601	1181700	chrUn_2	0	0	20.1405	2	open sea	.	.	.	.	.	.
scaffold_122	1355401	1355500	chrUn_2	0	0	20.7453	4	shore	.	.	.	.	.	.
scaffold_12226	14701	14800	chrUn	0	0	35.8797	4	shore	0	GSONMT00009377001	.	.	.	.
scaffold_12226	14801	14900	chrUn	0	0	57.9501	4	shelf	0	GSONMT00009377001	.	.	.	.
scaffold_1227	216001	216100	chrUn_5	0	0	20.8728	2	shelf	0	GSONMT00013393001	AFF1_HUMAN	AF4/FMR2 family member 1	2e-22	.
scaffold_12290	3301	3400	chrUn	0	0	20.692	6	open sea	.	.	.	.	.	.
scaffold_123	598401	598500	chrUn_16	0	0	28.6454	2	open sea	0	GSONMT00065995001	TBKB1_MOUSE	TANK-binding kinase 1-binding protein 1	3e-74	.
scaffold_123	1226701	1226800	chrUn_16	0	0	-27.6314	2	island	.	.	.	.	.	.
scaffold_123	1363601	1363700	chrUn_16	0	0	19.9787	3	open sea	0	GSONMT00066028001	DUS3_MOUSE	Dual specificity protein phosphatase 3	6e-88	.
scaffold_12300	15201	15300	chrUn_7	0	0	22.7561	4	open sea	.	.	.	.	.	.
scaffold_1231	96501	96600	chrUn	0	0	52.4553	5	shore	.	.	.	.	.	.
scaffold_12318	7201	7300	chrUn	0	0	21.2194	3	open sea	.	.	.	.	.	ID=RM715121;Name=RM715121;Note=Motif:REX1-1_AFC
scaffold_1232	289001	289100	chrUn_17	0	0	22.5858	3	open sea	-9494	GSONMT00044905001	XYLT1_HUMAN	Xylosyltransferase 1	3e-42	.
scaffold_1233	92601	92700	chrUn	0	0	33.3317	5	shore	.	.	.	.	.	.
scaffold_12348	9701	9800	chrUn	0	0	29.1752	3	open sea	.	.	.	.	.	.
scaffold_1235	263001	263100	chrUn_4	0	0	19.5153	2	open sea	0	GSONMT00041265001	KCNC1_HUMAN	Potassium voltage-gated channel subfamily C member 1	2e-112	.
scaffold_1238	167601	167700	chrUn	0	0	78.892	8	island	0	GSONMT00008754001	WNT8B_DANRE	Protein Wnt-8b	0	.
scaffold_1238	167701	167800	chrUn	0	0	46.841	5	island	0	GSONMT00008754001	WNT8B_DANRE	Protein Wnt-8b	0	.
scaffold_1239	232001	232100	chrUn	0	0	21.5432	5	island	.	.	.	.	.	.
scaffold_12398	5801	5900	chrUn	0	0	36.791	2	open sea	0	GSONMT00014976001	CXCR3_CAPHI	C-X-C chemokine receptor type 3	3e-65	.
scaffold_12398	5901	6000	chrUn	0	0	67.7922	5	open sea	0	GSONMT00014976001	CXCR3_CAPHI	C-X-C chemokine receptor type 3	3e-65	.
scaffold_124	558101	558200	chrUn_6	0	0	21.9998	1	shore	4419	GSONMT00066077001	AL1A2_CHICK	Retinal dehydrogenase 2	1e-153	.
scaffold_124	1349501	1349600	chrUn_6	0	0	20.4127	1	shore	4550	GSONMT00066140001	.	.	.	.
scaffold_1240	177501	177600	chrUn	0	0	28.6297	4	open sea	.	.	.	.	.	.
scaffold_12421	10001	10100	chrUn	0	0	21.8538	5	open sea	.	.	.	.	.	.
scaffold_12422	1301	1400	chrUn	0	0	42.4819	7	island	.	.	.	.	.	.
scaffold_12422	1401	1500	chrUn	0	0	19.8854	7	island	.	.	.	.	.	.
scaffold_12426	9901	10000	chrUn_24	0	0	21.1162	1	shore	.	.	.	.	.	.
scaffold_12480	7801	7900	chrUn	0	0	90.7243	4	shelf	-619	GSONMT00057569001	OPA3_DANRE	Optic atrophy 3 protein homolog	4e-23	.
scaffold_125	442101	442200	chrUn_19	0	0	19.8487	4	island	.	.	.	.	.	ID=RM722616;Name=RM722616;Note=Motif:REX1-1_AFC
scaffold_125	618601	618700	chrUn_19	0	0	22.7222	2	shore	.	.	.	.	.	.
scaffold_125	1000901	1001000	chrUn_19	0	0	34.9642	5	shore	6287	GSONMT00066171001	KAD7_HUMAN	Adenylate kinase 7	0	.
scaffold_125	1251101	1251200	chrUn_19	0	0	33.5377	2	open sea	.	.	.	.	.	.
scaffold_12523	16101	16200	chrUn	0	0	22.5498	3	open sea	.	.	.	.	.	ID=RM724443;Name=RM724443;Note=Motif:HPAI
scaffold_12525	8101	8200	chrUn	0	0	49.4254	5	shore	.	.	.	.	.	.
scaffold_12562	9601	9700	chrUn	0	0	-80.1604	5	shore	0	GSONMT00009527001	IRX3_XENTR	Iroquois-class homeodomain protein irx-3	4e-56	.
scaffold_12562	13301	13400	chrUn	0	0	-27.933	5	open sea	1736	GSONMT00009527001	IRX3_XENTR	Iroquois-class homeodomain protein irx-3	4e-56	.
scaffold_1257	157701	157800	chrUn	0	0	39.2149	3	shore	0	GSONMT00029446001	AP3B1_MOUSE	AP-3 complex subunit beta-1	3e-84	.
scaffold_1257	157801	157900	chrUn	0	0	21.9562	5	shore	0	GSONMT00029446001	AP3B1_MOUSE	AP-3 complex subunit beta-1	3e-84	.
scaffold_1258	56201	56300	chrUn	0	0	21.5807	6	open sea	.	.	.	.	.	ID=RM726264;Name=RM726264;Note=Motif:Ronin1_I-int
scaffold_1258	188401	188500	chrUn	0	0	23.0367	1	open sea	.	.	.	.	.	ID=RM726378;Name=RM726378;Note=Motif:Gypsy-11_GA-I-int
scaffold_1258	281901	282000	chrUn	0	0	55.3953	7	island	.	.	.	.	.	.
scaffold_1258	282101	282200	chrUn	0	0	20.004	5	island	.	.	.	.	.	.
scaffold_12581	6701	6800	chrUn	0	0	22.6242	4	open sea	.	.	.	.	.	.
scaffold_1259	53101	53200	chrUn	0	0	22.339	3	shore	.	.	.	.	.	ID=RM726613;Name=RM726613;Note=Motif:Gypsy-35_GA-I-int
scaffold_1259	123201	123300	chrUn	0	0	22.2726	2	shore	.	.	.	.	.	.
scaffold_126	22601	22700	chr_17	0	0	98.1331	5	open sea	0	GSONMT00066180001	AQP7_HUMAN	Aquaporin-7	1e-54	.
scaffold_126	22801	22900	chr_17	0	0	96.5381	7	open sea	0	GSONMT00066180001	AQP7_HUMAN	Aquaporin-7	1e-54	.
scaffold_126	22901	23000	chr_17	0	0	97.6122	5	open sea	0	GSONMT00066180001	AQP7_HUMAN	Aquaporin-7	1e-54	.
scaffold_126	282201	282300	chr_17	0	0	20.4744	3	open sea	-6440	GSONMT00066193001	RFESD_HUMAN	Rieske domain-containing protein	2e-42	.
scaffold_126	1140101	1140200	chr_17	0	0	20.7588	3	shore	.	.	.	.	.	ID=RM727841;Name=RM727841;Note=Motif:Ronin1_I-int
scaffold_12611	3801	3900	chrUn	0	0	21.1112	4	open sea	.	.	.	.	.	ID=RM728741;Name=RM728741;Note=Motif:REX1-1_AFC
scaffold_12634	12201	12300	chrUn	0	0	24.6951	5	open sea	.	.	.	.	.	.
scaffold_1266	92901	93000	chrUn	0	0	22.7097	3	shore	.	.	.	.	.	ID=RM730415;Name=RM730415;Note=Motif:Ronin1_I-int
scaffold_12688	12301	12400	chrUn	0	0	25.2101	5	shore	.	.	.	.	.	.
scaffold_12690	14201	14300	chrUn	0	0	39.0811	4	open sea	.	.	.	.	.	.
scaffold_127	143501	143600	chrUn	0	0	19.85	1	open sea	.	.	.	.	.	.
scaffold_127	430201	430300	chrUn	0	0	21.7686	2	open sea	0	GSONMT00066267001	TITIN_HUMAN	Titin	0	.
scaffold_127	972401	972500	chrUn	0	0	42.1876	4	open sea	.	.	.	.	.	.
scaffold_1271	114801	114900	chrUn	0	0	24.8979	2	shore	6831	GSONMT00020057001	AGGF1_MOUSE	Angiogenic factor with G patch and FHA domains 1	6e-130	.
scaffold_1273	147801	147900	chr_23	0	0	23.5295	5	open sea	0	GSONMT00026983001	TEKT3_HUMAN	Tektin-3	3e-68	.
scaffold_12735	501	600	chrUn	0	0	-38.7928	8	island	.	.	.	.	.	.
scaffold_12739	10201	10300	chrUn	0	0	19.6405	1	shore	.	.	.	.	.	ID=RM733973;Name=RM733973;Note=Motif:CR1-40_DR
scaffold_1278	152801	152900	chrUn	0	0	36.5045	3	open sea	.	.	.	.	.	.
scaffold_128	226901	227000	chrUn_15	0	0	22.42	2	shore	.	.	.	.	.	.
scaffold_128	365401	365500	chrUn_15	0	0	23.6189	7	island	0	GSONMT00066315001	JAM1_HUMAN	Junctional adhesion molecule A	1e-53	.
scaffold_1283	64801	64900	chrUn_7	0	0	21.9446	10	shore	-3223	GSONMT00010838001	CYTL1_HUMAN	Cytokine-like protein 1	1e-18	.
scaffold_1284	273401	273500	chrUn_28	0	0	38.4168	4	island	0	GSONMT00047507001	CAD24_MOUSE	Cadherin-24	3e-61	.
scaffold_1287	260401	260500	chrUn_5	0	0	43.7601	7	shelf	0	GSONMT00014370001	RIC1_HUMAN	RAB6A-GEF complex partner protein 1	0	.
scaffold_1288	4001	4100	chrUn_11	0	0	20.9684	8	open sea	.	.	.	.	.	.
scaffold_1289	240601	240700	chrUn	0	0	21.7154	2	open sea	.	.	.	.	.	.
scaffold_129	714301	714400	chr_6	0	0	19.7416	2	open sea	0	GSONMT00066385001	LOXH1_MOUSE	Lipoxygenase homology domain-containing protein 1	0	.
scaffold_129	1015001	1015100	chr_6	0	0	31.4341	4	open sea	0	GSONMT00066411001	MLRA_HUMAN	Myosin regulatory light chain 2, atrial isoform	4e-82	.
scaffold_1290	9001	9100	chrUn_10	0	0	26.8191	2	shore	.	.	.	.	.	ID=RM741676;Name=RM741676;Note=Motif:Gypsy-10_GA-I-int
scaffold_1290	114001	114100	chrUn_10	0	0	21.5924	3	open sea	5889	GSONMT00062516001	T132E_HUMAN	Transmembrane protein 132E	6e-89	.
scaffold_1291	47701	47800	chrUn	0	0	42.4126	1	open sea	.	.	.	.	.	.
scaffold_1291	126101	126200	chrUn	0	0	27.0634	1	open sea	0	GSONMT00050364001	DLG2_DANRE	Disks large homolog 2	0	.
scaffold_1291	247701	247800	chrUn	0	0	22.4902	4	shore	9324	GSONMT00050368001	OVOL1_HUMAN	Putative transcription factor Ovo-like 1	2e-62	.
scaffold_1292	33501	33600	chrUn_6	0	0	35.5486	2	open sea	0	GSONMT00033871001	.	.	.	.
scaffold_1292	41801	41900	chrUn_6	0	0	24.5179	2	open sea	-7579	GSONMT00033871001	.	.	.	.
scaffold_1294	181801	181900	chrUn	0	0	34.2472	6	shore	4107	GSONMT00026361001	HES6_HUMAN	Transcription cofactor HES-6	4e-59	.
scaffold_12954	14801	14900	chrUn_29	0	0	21.4128	3	open sea	4815	GSONMT00036412001	.	.	.	.
scaffold_1296	104401	104500	chrUn	0	0	22.7314	3	shore	.	.	.	.	.	ID=RM743757;Name=RM743757;Note=Motif:Ronin1_I-int
scaffold_1299	16301	16400	chrUn_21	0	0	44.5186	7	shelf	-2649	GSONMT00019757001	RS3A_SALSA	40S ribosomal protein S3a	2e-153	.
scaffold_1299	264501	264600	chrUn_21	0	0	26.9987	2	open sea	.	.	.	.	.	.
scaffold_12991	3601	3700	chrUn	0	0	62.3624	4	open sea	.	.	.	.	.	.
scaffold_130	290101	290200	chrUn_17	0	0	92.3972	4	open sea	.	.	.	.	.	.
scaffold_130	1119701	1119800	chrUn_17	0	0	19.7443	2	shore	.	.	.	.	.	ID=RM748270;Name=RM748270;Note=Motif:KenoDr1
scaffold_1301	206501	206600	chrUn_7	0	0	19.532	7	shore	.	.	.	.	.	.
scaffold_1301	219901	220000	chrUn_7	0	0	19.5864	5	open sea	.	.	.	.	.	ID=RM749035;Name=RM749035;Note=Motif:Copia-7-I_DR-int
scaffold_13010	15801	15900	chrUn_24	0	0	20.5209	4	open sea	.	.	.	.	.	.
scaffold_1302	95501	95600	chrUn	0	0	22.8623	2	open sea	.	.	.	.	.	ID=RM749325;Name=RM749325;Note=Motif:REX1-1_AFC
scaffold_1302	213401	213500	chrUn	0	0	81.0532	3	open sea	.	.	.	.	.	.
scaffold_13043	6101	6200	chrUn	0	0	33.8599	4	island	0	GSONMT00049039001	TPBG_MACFA	Trophoblast glycoprotein	4e-61	.
scaffold_1305	127501	127600	chrUn	0	0	-35.2291	5	open sea	0	GSONMT00007285001	NR4A2_BOVIN	Nuclear receptor subfamily 4 group A member 2	0	.
scaffold_1307	157801	157900	chrUn	0	0	-47.2795	10	island	0	GSONMT00046895001	UBN2_RAT	Ubinuclein-2	5e-93	.
scaffold_1308	183001	183100	chrUn	0	0	27.3071	3	open sea	.	.	.	.	.	ID=RM751319;Name=RM751319;Note=Motif:Gypsy-47_GA-I-int
scaffold_1308	193301	193400	chrUn	0	0	25.7741	6	open sea	.	.	.	.	.	.
scaffold_131	33301	33400	chrUn_23	0	0	96.1983	5	shelf	0	GSONMT00066584001	MARH5_CHICK	E3 ubiquitin-protein ligase MARCH5	5e-50	.
scaffold_131	345001	345100	chrUn_23	0	0	32.9574	1	shelf	.	.	.	.	.	ID=RM752106;Name=RM752106;Note=Motif:REX1-1_AFC
scaffold_131	673301	673400	chrUn_23	0	0	25.8085	2	island	.	.	.	.	.	.
scaffold_131	1226301	1226400	chrUn_23	0	0	23.7221	4	open sea	0	GSONMT00066610001	TTC40_HUMAN	Tetratricopeptide repeat protein 40	0	.
scaffold_131	1489301	1489400	chrUn_23	0	0	25.2759	3	open sea	0	GSONMT00066620001	THOC2_RHIFE	THO complex subunit 2	4e-69	.
scaffold_1314	177701	177800	chrUn_5	0	0	23.3382	3	shore	0	GSONMT00040223001	DNJB5_MOUSE	DnaJ homolog subfamily B member 5	6e-143	.
scaffold_13170	7201	7300	chrUn_1	0	0	22.2051	4	shelf	.	.	.	.	.	.
scaffold_1318	193701	193800	chrUn	0	0	25.5131	6	open sea	.	.	.	.	.	.
scaffold_1318	206601	206700	chrUn	0	0	26.7047	3	shore	.	.	.	.	.	.
scaffold_132	28901	29000	chrUn_27	0	0	-46.886	7	island	.	.	.	.	.	.
scaffold_132	511601	511700	chrUn_27	0	0	20.5371	2	shore	-8378	GSONMT00066645001	.	.	.	.
scaffold_132	572201	572300	chrUn_27	0	0	29.1045	4	open sea	-4166	GSONMT00066649001	ANKK1_HUMAN	Ankyrin repeat and protein kinase domain-containing protein 1	3e-89	.
scaffold_132	1043101	1043200	chrUn_27	0	0	21.6969	1	open sea	.	.	.	.	.	.
scaffold_132	1214201	1214300	chrUn_27	0	0	28.6354	5	open sea	.	.	.	.	.	.
scaffold_132	1288101	1288200	chrUn_27	0	0	23.6215	7	shore	.	.	.	.	.	.
scaffold_132	1436801	1436900	chrUn_27	0	0	22.2029	6	open sea	0	GSONMT00066675001	GRIK4_PANTR	Glutamate receptor ionotropic, kainate 4	2e-144	.
scaffold_132	1451301	1451400	chrUn_27	0	0	26.6567	5	shore	0	GSONMT00066675001	GRIK4_PANTR	Glutamate receptor ionotropic, kainate 4	2e-144	.
scaffold_1320	260901	261000	chrUn	0	0	20.058	4	open sea	.	.	.	.	.	.
scaffold_13270	1701	1800	chrUn	0	0	-86.6634	8	island	.	.	.	.	.	.
scaffold_13273	3701	3800	chrUn	0	0	19.7734	5	shore	.	.	.	.	.	ID=RM760388;Name=RM760388;Note=Motif:Gypsy-10_GA-I-int
scaffold_133	424801	424900	chrUn_5	0	0	20.9424	4	shelf	.	.	.	.	.	.
scaffold_133	619801	619900	chrUn_5	0	0	27.0392	4	open sea	5416	GSONMT00066697001	CBPC6_MOUSE	Cytosolic carboxypeptidase 6	5e-53	.
scaffold_133	1258201	1258300	chrUn_5	0	0	22.7475	4	open sea	.	.	.	.	.	.
scaffold_133	1270201	1270300	chrUn_5	0	0	19.5347	2	island	.	.	.	.	.	.
scaffold_1332	76701	76800	chrUn_10	0	0	62.0312	6	open sea	1724	GSONMT00030082001	ZHANG_HUMAN	CREB/ATF bZIP transcription factor	7e-34	.
scaffold_1333	85201	85300	chrUn_13	0	0	65.0971	2	shore	7018	GSONMT00032276001	C1GLT_MOUSE	Glycoprotein-N-acetylgalactosamine 3-beta-galactosyltransferase 1	1e-90	.
scaffold_1334	94701	94800	chrUn_14	0	0	19.9466	1	shore	.	.	.	.	.	.
scaffold_13379	14401	14500	chrUn	0	0	22.1811	7	island	0	GSONMT00005888001	V2R1_MOUSE	Vomeronasal type-2 receptor 1	5e-43	.
scaffold_1338	28401	28500	chrUn	0	0	93.6999	3	open sea	0	GSONMT00003150001	PKP4_HUMAN	Plakophilin-4	0	.
scaffold_1338	81801	81900	chrUn	0	0	93.1215	4	open sea	0	GSONMT00003153001	PKP4_HUMAN	Plakophilin-4	4e-24	.
scaffold_134	60601	60700	chrUn_8	0	0	19.888	2	open sea	.	.	.	.	.	.
scaffold_134	627101	627200	chrUn_8	0	0	-67.4701	6	open sea	9059	GSONMT00066750001	TPD53_HUMAN	Tumor protein D53	1e-63	.
scaffold_134	655001	655100	chrUn_8	0	0	80.6535	5	open sea	.	.	.	.	.	.
scaffold_13403	7501	7600	chrUn	0	0	31.9699	6	open sea	.	.	.	.	.	.
scaffold_1344	227301	227400	chrUn_Sex	0	0	-85.0828	6	island	0	GSONMT00033437001	PO5F1_DANRE	POU domain, class 5, transcription factor 1	3e-175	.
scaffold_1344	227401	227500	chrUn_Sex	0	0	-87.6947	9	island	0	GSONMT00033437001	PO5F1_DANRE	POU domain, class 5, transcription factor 1	3e-175	.
scaffold_1347	248401	248500	chrUn_8	0	0	26.0276	6	shore	0	GSONMT00050939001	KLH18_HUMAN	Kelch-like protein 18	5e-77	.
scaffold_13470	5701	5800	chrUn_16	0	0	21.3575	2	open sea	.	.	.	.	.	.
scaffold_1348	86401	86500	chrUn	0	0	94.2182	2	open sea	-5730	GSONMT00009608001	ETV4_DANRE	ETS translocation variant 4	0	.
scaffold_135	862101	862200	chrUn_21	0	0	55.0995	4	open sea	0	GSONMT00066839001	ABCA1_HUMAN	ATP-binding cassette sub-family A member 1	4e-166	.
scaffold_135	1153401	1153500	chrUn_21	0	0	32.9629	2	open sea	.	.	.	.	.	.
scaffold_1352	5401	5500	chrUn	0	0	19.5357	2	shelf	.	.	.	.	.	ID=RM771505;Name=RM771505;Note=Motif:CR1-40_DR
scaffold_13533	3301	3400	chrUn	0	0	21.7246	2	open sea	.	.	.	.	.	ID=RM772103;Name=RM772103;Note=Motif:CR1-26_DR
scaffold_13549	4901	5000	chrUn	0	0	35.4862	3	shore	0	GSONMT00055244001	KI26B_MOUSE	Kinesin-like protein KIF26B	4e-104	.
scaffold_13549	5001	5100	chrUn	0	0	23.2753	2	shore	0	GSONMT00055244001	KI26B_MOUSE	Kinesin-like protein KIF26B	4e-104	.
scaffold_1355	82901	83000	chrUn_10	0	0	24.1408	1	open sea	.	.	.	.	.	.
scaffold_1356	99701	99800	chrUn_13	0	0	33.5018	1	open sea	934	GSONMT00034789001	UBAD2_DANRE	UBA-like domain-containing protein 2	3e-21	.
scaffold_13566	4401	4500	chrUn	0	0	36.9671	3	open sea	0	GSONMT00002151001	LIMA1_PIG	LIM domain and actin-binding protein 1	6e-58	.
scaffold_13569	5901	6000	chrUn_7	0	0	32.2498	9	open sea	.	.	.	.	.	.
scaffold_1357	117101	117200	chrUn_14	0	0	19.6214	4	shelf	.	.	.	.	.	.
scaffold_1357	195101	195200	chrUn_14	0	0	22.4428	2	open sea	3946	GSONMT00008370001	RAB25_HUMAN	Ras-related protein Rab-25	1e-98	.
scaffold_136	88501	88600	chrUn_20	0	0	23.8684	1	shore	0	GSONMT00066855001	.	.	.	.
scaffold_136	594701	594800	chrUn_20	0	0	26.7095	4	open sea	.	.	.	.	.	.
scaffold_136	622301	622400	chrUn_20	0	0	-87.5085	7	island	-189	GSONMT00066870001	RPGF2_HUMAN	Rap guanine nucleotide exchange factor 2	0	.
scaffold_1360	59401	59500	chrUn	0	0	19.9073	3	island	0	GSONMT00059036001	CSTN2_MOUSE	Calsyntenin-2	3e-113	.
scaffold_13609	7701	7800	chrUn	0	0	20.9843	1	open sea	0	GSONMT00031868001	SARDH_MOUSE	Sarcosine dehydrogenase, mitochondrial	1e-94	.
scaffold_1361	238901	239000	chr_7	0	0	23.6145	6	shore	7500	GSONMT00000424001	XIRP2_MOUSE	Xin actin-binding repeat-containing protein 2	2e-49	.
scaffold_1363	6701	6800	chrUn	0	0	22.973	2	shore	.	.	.	.	.	.
scaffold_1363	220701	220800	chrUn	0	0	19.9167	13	island	3195	GSONMT00036575001	PHF5A_RAT	PHD finger-like domain-containing protein 5A	2e-74	.
scaffold_1363	220801	220900	chrUn	0	0	21.7967	8	island	3095	GSONMT00036575001	PHF5A_RAT	PHD finger-like domain-containing protein 5A	2e-74	.
scaffold_1364	139401	139500	chrUn	0	0	28.2114	2	shore	.	.	.	.	.	ID=RM776704;Name=RM776704;Note=Motif:Ronin3_I-int
scaffold_1367	120001	120100	chrUn_16	0	0	76.9551	5	shelf	0	GSONMT00001894001	CNRP1_HUMAN	CB1 cannabinoid receptor-interacting protein 1	2e-71	.
scaffold_1369	137201	137300	chrUn_29	0	0	26.1856	7	open sea	0	GSONMT00017433001	PGFRB_TAKRU	Platelet-derived growth factor receptor beta	0	.
scaffold_1369	137301	137400	chrUn_29	0	0	31.1352	3	open sea	0	GSONMT00017433001	PGFRB_TAKRU	Platelet-derived growth factor receptor beta	0	.
scaffold_137	44301	44400	chrUn_4	0	0	24.3895	4	shore	9691	GSONMT00066898001	RTJK_DROME	RNA-directed DNA polymerase from mobile element jockey	8e-13	.
scaffold_137	69801	69900	chrUn_4	0	0	19.8179	1	shore	.	.	.	.	.	ID=RM778439;Name=RM778439;Note=Motif:Gypsy-35_GA-I-int
scaffold_137	450301	450400	chrUn_4	0	0	21.386	5	open sea	.	.	.	.	.	.
scaffold_137	450501	450600	chrUn_4	0	0	24.8639	6	open sea	.	.	.	.	.	.
scaffold_137	863801	863900	chrUn_4	0	0	23.9759	5	shore	.	.	.	.	.	ID=RM779018;Name=RM779018;Note=Motif:Gypsy-10_GA-I-int
scaffold_137	1106901	1107000	chrUn_4	0	0	20.9148	6	shelf	1503	GSONMT00066911001	RTBS_DROME	Probable RNA-directed DNA polymerase from transposon BS	2e-26	.
scaffold_137	1363101	1363200	chrUn_4	0	0	38.995	4	shore	8519	GSONMT00066914001	.	.	.	.
scaffold_137	1368501	1368600	chrUn_4	0	0	33.9041	1	shelf	.	.	.	.	.	.
scaffold_1370	198401	198500	chrUn	0	0	47.015	5	open sea	.	.	.	.	.	.
scaffold_1371	101501	101600	chrUn	0	0	25.422	1	open sea	.	.	.	.	.	.
scaffold_1371	168801	168900	chrUn	0	0	23.9683	1	shore	-7892	GSONMT00013334001	SEZ6_XENLA	Seizure protein 6 homolog	0	.
scaffold_1372	54301	54400	chrUn_2	0	0	25.5699	1	open sea	0	GSONMT00048431001	ASZ1_MACEU	Ankyrin repeat, SAM and basic leucine zipper domain-containing protein 1	1e-85	.
scaffold_1372	212001	212100	chrUn_2	0	0	38.2497	1	open sea	0	GSONMT00048437001	CAZA2_CHICK	F-actin-capping protein subunit alpha-2	2e-178	.
scaffold_1372	212101	212200	chrUn_2	0	0	24.1661	6	open sea	0	GSONMT00048437001	CAZA2_CHICK	F-actin-capping protein subunit alpha-2	2e-178	.
scaffold_13733	3001	3100	chrUn	0	0	21.9454	7	island	.	.	.	.	.	.
scaffold_13746	1901	2000	chrUn	0	0	24.5671	2	shore	0	GSONMT00019950001	LIG1B_DANRE	Leucine-rich repeat and immunoglobulin-like domain-containing nogo receptor-interacting protein 1-B	0	.
scaffold_1377	191101	191200	chrUn	0	0	22.1093	3	open sea	-4407	GSONMT00013098001	VSTM5_HUMAN	V-set and transmembrane domain-containing protein 5	2e-34	.
scaffold_138	101801	101900	chrUn_29	0	0	20.2345	6	open sea	-8701	GSONMT00066918001	RTBS_DROME	Probable RNA-directed DNA polymerase from transposon BS	1e-16	.
scaffold_138	135601	135700	chrUn_29	0	0	-39.7381	6	open sea	.	.	.	.	.	.
scaffold_1380	164701	164800	chrUn	0	0	21.037	3	shelf	-7655	GSONMT00060578001	CNTP3_HUMAN	Contactin-associated protein-like 3	2e-79	.
scaffold_1381	123701	123800	chrUn	0	0	28.5274	4	open sea	.	.	.	.	.	.
scaffold_1384	32501	32600	chrUn	0	0	23.8961	4	open sea	.	.	.	.	.	.
scaffold_13842	2001	2100	chrUn	0	0	25.8943	1	open sea	.	.	.	.	.	.
scaffold_13876	6701	6800	chrUn_24	0	0	20.9096	1	shore	.	.	.	.	.	.
scaffold_1391	54801	54900	chrUn_18	0	0	20.9723	5	shore	-4226	GSONMT00058228001	T106B_DANRE	Transmembrane protein 106B	3e-62	.
scaffold_1391	54901	55000	chrUn_18	0	0	38.0452	3	shore	-4326	GSONMT00058228001	T106B_DANRE	Transmembrane protein 106B	3e-62	.
scaffold_1392	226901	227000	chrUn_14	0	0	74.7072	2	open sea	0	GSONMT00047363001	JARD2_MOUSE	Protein Jumonji	0	.
scaffold_1394	30401	30500	chrUn_Sex	0	0	19.5638	3	open sea	.	.	.	.	.	.
scaffold_13944	1301	1400	chrUn	0	0	19.5501	6	open sea	.	.	.	.	.	ID=RM789793;Name=RM789793;Note=Motif:CR1-40_DR
scaffold_1395	115901	116000	chrUn_20	0	0	22.6972	2	open sea	3444	GSONMT00016520001	PGAM1_CHICK	Phosphoglycerate mutase 1	1e-165	.
scaffold_1395	233901	234000	chrUn_20	0	0	-29.3615	9	shelf	0	GSONMT00016528001	NKX23_HUMAN	Homeobox protein Nkx-2.3	1e-60	.
scaffold_13968	6101	6200	chrUn	0	0	25.2888	3	open sea	.	.	.	.	.	ID=RM790568;Name=RM790568;Note=Motif:HPAI
scaffold_1398	200401	200500	chrUn_27	0	0	25.6344	3	shore	.	.	.	.	.	.
scaffold_13983	6501	6600	chrUn	0	0	97.367	5	open sea	.	.	.	.	.	.
scaffold_1399	166401	166500	chrUn	0	0	40.3847	3	open sea	.	.	.	.	.	ID=RM791351;Name=RM791351;Note=Motif:RTEX-1_DR
scaffold_14	239701	239800	chrUn_24	0	0	95.0837	4	open sea	0	GSONMT00067054001	RELB_MOUSE	Transcription factor RelB	3e-113	.
scaffold_140	273501	273600	chrUn_9	0	0	19.7256	3	shore	0	GSONMT00067160001	H2AZ_CHICK	Histone H2A.Z	1e-85	.
scaffold_140	280701	280800	chrUn_9	0	0	22.2835	5	open sea	-955	GSONMT00067161001	DDT4L_MOUSE	DNA damage-inducible transcript 4-like protein	4e-75	.
scaffold_140	600901	601000	chrUn_9	0	0	40.1625	7	open sea	0	GSONMT00067171001	NFIB_HUMAN	Nuclear factor 1 B-type	0	.
scaffold_140	601001	601100	chrUn_9	0	0	23.8802	4	open sea	0	GSONMT00067171001	NFIB_HUMAN	Nuclear factor 1 B-type	0	.
scaffold_140	926401	926500	chrUn_9	0	0	19.6419	7	open sea	-505	GSONMT00067203001	RGS12_HUMAN	Regulator of G-protein signaling 12	9e-58	.
scaffold_140	1243101	1243200	chrUn_9	0	0	20.7346	5	open sea	-4865	GSONMT00067210001	HMX1_CHICK	Homeobox protein HMX1	1e-57	.
scaffold_1402	19401	19500	chr_7	0	0	22.1156	4	open sea	2596	GSONMT00033976001	HDAC5_CRIGR	Histone deacetylase 5	6e-108	.
scaffold_1402	94001	94100	chr_7	0	0	28.8094	3	open sea	0	GSONMT00033985001	ITA5_XENLA	Integrin alpha-5	1e-136	.
scaffold_14033	12901	13000	chrUn_5	0	0	20.7294	8	island	.	.	.	.	.	ID=RM795964;Name=RM795964;Note=Motif:Gypsy1-I_GA-int
scaffold_1405	204701	204800	chrUn_24	0	0	-64.4318	7	shore	0	GSONMT00028324001	TBX2_DANRE	T-box transcription factor TBX2b	0	.
scaffold_1406	154601	154700	chrUn	0	0	28.3172	4	shore	0	GSONMT00000816001	LRP4_MOUSE	Low-density lipoprotein receptor-related protein 4	5e-125	.
scaffold_1408	229201	229300	chrUn	0	0	48.4157	3	open sea	-9754	GSONMT00026880001	DEN2A_HUMAN	DENN domain-containing protein 2A	3e-60	.
scaffold_14098	6901	7000	chrUn	0	0	22.2721	5	island	0	GSONMT00023875001	MYBPH_HUMAN	Myosin-binding protein H	3e-131	.
scaffold_141	911401	911500	chrUn_Sex	0	0	74.136	2	shore	.	.	.	.	.	.
scaffold_14141	11601	11700	chrUn	0	0	28.4065	5	open sea	0	GSONMT00005543001	MYOM1_HUMAN	Myomesin-1	2e-20	.
scaffold_14141	11701	11800	chrUn	0	0	37.6762	4	open sea	0	GSONMT00005543001	MYOM1_HUMAN	Myomesin-1	2e-20	.
scaffold_1417	5201	5300	chrUn_11	0	0	26.4975	2	shore	0	GSONMT00016345001	GCNT4_DANRE	Beta-1,3-galactosyl-O-glycosyl-glycoprotein beta-1,6-N-acetylglucosaminyltransferase 4	0	.
scaffold_1419	90501	90600	chrUn_1	0	0	28.3224	4	shelf	0	GSONMT00010361001	WDR11_HUMAN	WD repeat-containing protein 11	0	.
scaffold_142	53801	53900	chrUn_2	0	0	29.0159	3	open sea	.	.	.	.	.	.
scaffold_142	354701	354800	chrUn_2	0	0	19.7697	2	open sea	.	.	.	.	.	.
scaffold_142	389601	389700	chrUn_2	0	0	23.1392	3	shore	.	.	.	.	.	.
scaffold_142	1157101	1157200	chrUn_2	0	0	44.6965	2	shelf	.	.	.	.	.	.
scaffold_14201	10501	10600	chrUn	0	0	19.8045	8	island	.	.	.	.	.	.
scaffold_1421	39701	39800	chrUn_11	0	0	23.0315	2	open sea	-2652	GSONMT00026418001	.	.	.	.
scaffold_1422	148201	148300	chrUn_5	0	0	19.9349	8	island	-6049	GSONMT00022321001	NLRC3_HUMAN	Protein NLRC3	2e-48	.
scaffold_1425	121701	121800	chrUn	0	0	21.6675	4	shore	.	.	.	.	.	ID=RM805064;Name=RM805064;Note=Motif:Gypsy-35_GA-I-int
scaffold_1428	235001	235100	chrUn	0	0	23.5357	2	open sea	.	.	.	.	.	ID=RM806000;Name=RM806000;Note=Motif:UnaL2
scaffold_14316	11301	11400	chrUn	0	0	-21.2373	3	open sea	6991	GSONMT00032592001	PREX2_HUMAN	Phosphatidylinositol 3,4,5-trisphosphate-dependent Rac exchanger 2 protein	7e-68	.
scaffold_14332	9301	9400	chrUn	0	0	92.5511	3	open sea	0	GSONMT00013756001	ZBTB5_HUMAN	Zinc finger and BTB domain-containing protein 5	2e-60	.
scaffold_1437	127401	127500	chrUn	0	0	19.6295	3	open sea	0	GSONMT00030246001	AGRIN_DIPOM	Agrin, partial	1e-119	.
scaffold_1437	194401	194500	chrUn	0	0	29.0736	4	shore	0	GSONMT00030247001	AGRIN_CHICK	Agrin	4e-130	.
scaffold_14373	3401	3500	chrUn	0	0	28.8237	5	shore	.	.	.	.	.	.
scaffold_14382	3101	3200	chrUn	0	0	27.5547	6	shore	0	GSONMT00060729001	CO3_ONCMY	Complement C3	1e-117	.
scaffold_14382	3401	3500	chrUn	0	0	30.8526	8	island	0	GSONMT00060729001	CO3_ONCMY	Complement C3	1e-117	.
scaffold_14382	3501	3600	chrUn	0	0	56.1467	6	island	0	GSONMT00060729001	CO3_ONCMY	Complement C3	1e-117	.
scaffold_14383	2701	2800	chrUn	0	0	35.0797	2	shore	.	.	.	.	.	ID=RM810148;Name=RM810148;Note=Motif:Gypsy1-I_GA-int
scaffold_1439	233101	233200	chrUn	0	0	20.5327	10	shore	.	.	.	.	.	ID=RM810451;Name=RM810451;Note=Motif:Ronin1_I-int
scaffold_14399	501	600	chrUn	0	0	25.8185	6	open sea	.	.	.	.	.	.
scaffold_144	815001	815100	chrUn_11	0	0	20.7439	3	open sea	.	.	.	.	.	ID=RM811131;Name=RM811131;Note=Motif:CR1-40_DR
scaffold_1442	165901	166000	chrUn_18	0	0	-43.705	12	island	0	GSONMT00041551001	MANEL_DANRE	Glycoprotein endo-alpha-1,2-mannosidase-like protein	0	.
scaffold_1442	166001	166100	chrUn_18	0	0	-34.8442	9	island	0	GSONMT00041551001	MANEL_DANRE	Glycoprotein endo-alpha-1,2-mannosidase-like protein	0	.
scaffold_1443	93801	93900	chrUn_16	0	0	23.7541	2	shore	.	.	.	.	.	ID=RM812597;Name=RM812597;Note=Motif:HPAI
scaffold_1443	219101	219200	chrUn_16	0	0	23.3332	3	shore	.	.	.	.	.	.
scaffold_1443	219201	219300	chrUn_16	0	0	33.4471	6	shore	.	.	.	.	.	.
scaffold_1444	72301	72400	chrUn	0	0	20.0733	2	shelf	-9857	GSONMT00059647001	ZFHX4_CHICK	Zinc finger homeobox protein 4	8e-16	.
scaffold_1445	4401	4500	chrUn_22	0	0	30.189	7	shelf	.	.	.	.	.	.
scaffold_1449	205901	206000	chrUn	0	0	-59.7064	7	open sea	4007	GSONMT00048227001	DACH2_MOUSE	Dachshund homolog 2	8e-63	.
scaffold_14498	3201	3300	chrUn	0	0	-59.9955	6	island	-1737	GSONMT00027927001	PLXA2_HUMAN	Plexin-A2	4e-180	.
scaffold_14498	3301	3400	chrUn	0	0	-65.5052	7	island	-1637	GSONMT00027927001	PLXA2_HUMAN	Plexin-A2	4e-180	.
scaffold_1451	49401	49500	chrUn	0	0	21.0085	3	shore	0	GSONMT00045186001	GPC3_PANTR	Glypican-3	9e-31	.
scaffold_14550	12601	12700	chrUn	0	0	34.7261	2	shelf	.	.	.	.	.	.
scaffold_14550	12701	12800	chrUn	0	0	24.0005	3	shelf	.	.	.	.	.	.
scaffold_1457	60301	60400	chrUn_3	0	0	34.8483	7	island	.	.	.	.	.	.
scaffold_1457	60401	60500	chrUn_3	0	0	26.0657	6	island	.	.	.	.	.	.
scaffold_14571	2601	2700	chrUn	0	0	28.8244	4	open sea	0	GSONMT00032850001	NKX12_MOUSE	NK1 transcription factor-related protein 2	2e-50	.
scaffold_14593	12301	12400	chrUn	0	0	22.6513	2	shore	.	.	.	.	.	ID=RM818489;Name=RM818489;Note=Motif:Ronin1_I-int
scaffold_146	122001	122100	chrUn_8	0	0	42.725	4	open sea	0	GSONMT00067497001	PARD3_MOUSE	Partitioning defective 3 homolog	9e-41	.
scaffold_146	122101	122200	chrUn_8	0	0	33.8776	11	open sea	0	GSONMT00067497001	PARD3_MOUSE	Partitioning defective 3 homolog	9e-41	.
scaffold_146	135501	135600	chrUn_8	0	0	64.7954	4	open sea	.	.	.	.	.	.
scaffold_14609	1401	1500	chrUn	0	0	19.9874	2	open sea	.	.	.	.	.	ID=RM819851;Name=RM819851;Note=Motif:CR1-40_DR
scaffold_14609	2301	2400	chrUn	0	0	25.648	3	open sea	.	.	.	.	.	ID=RM819854;Name=RM819854;Note=Motif:REX1-2_AFC
scaffold_14616	3601	3700	chrUn	0	0	24.8109	3	shore	.	.	.	.	.	ID=RM820090;Name=RM820090;Note=Motif:OSSINE1
scaffold_1463	13901	14000	chrUn_17	0	0	31.8035	5	open sea	-484	GSONMT00047768001	S61A2_ONCMY	Protein transport protein Sec61 subunit alpha isoform B	0	.
scaffold_1464	38301	38400	chrUn_29	0	0	33.8566	6	shore	0	GSONMT00008399001	NRDE2_HUMAN	Protein NRDE2 homolog	0	.
scaffold_1464	206901	207000	chrUn_29	0	0	21.2214	3	island	.	.	.	.	.	.
scaffold_1466	63301	63400	chrUn	0	0	21.6068	7	island	0	GSONMT00017409001	STA13_MOUSE	StAR-related lipid transfer protein 13	0	.
scaffold_14674	11501	11600	chrUn	0	0	24.5251	5	open sea	.	.	.	.	.	.
scaffold_147	278901	279000	chr_27	0	0	24.9494	2	open sea	.	.	.	.	.	.
scaffold_14711	10301	10400	chrUn	0	0	22.6695	5	shore	.	.	.	.	.	.
scaffold_14737	11101	11200	chrUn	0	0	48.2518	4	open sea	.	.	.	.	.	.
scaffold_14737	11301	11400	chrUn	0	0	78.1109	2	open sea	.	.	.	.	.	.
scaffold_1474	156101	156200	chrUn_2	0	0	20.8676	5	shore	351	GSONMT00052544001	ZP3_CHICK	Zona pellucida sperm-binding protein 3	8e-73	.
scaffold_14760	1801	1900	chrUn	0	0	23.0356	5	island	.	.	.	.	.	ID=RM825421;Name=RM825421;Note=Motif:Gypsy-165-I_DR-int
scaffold_14765	6901	7000	chrUn	0	0	20.1252	5	shore	.	.	.	.	.	.
scaffold_1478	189601	189700	chrUn_19	0	0	32.0996	3	open sea	.	.	.	.	.	.
scaffold_14792	10801	10900	chrUn	0	0	19.6302	0	open sea	.	.	.	.	.	ID=RM826218;Name=RM826218;Note=Motif:Ronin1_I-int
scaffold_14794	7801	7900	chrUn	0	0	21.1121	2	shelf	.	.	.	.	.	ID=RM826240;Name=RM826240;Note=Motif:TC1_FR3
scaffold_14794	8001	8100	chrUn	0	0	22.9308	2	shelf	.	.	.	.	.	.
scaffold_148	533601	533700	chrUn_19	0	0	21.2127	3	shore	.	.	.	.	.	ID=RM826676;Name=RM826676;Note=Motif:CR1-40_DR
scaffold_148	857301	857400	chrUn_19	0	0	36.6483	3	open sea	0	GSONMT00067621001	TTC6_HUMAN	Tetratricopeptide repeat protein 6	6e-134	.
scaffold_14898	1801	1900	chrUn	0	0	80.2548	5	open sea	.	.	.	.	.	.
scaffold_149	812101	812200	chr_6	0	0	39.3522	4	open sea	-1685	GSONMT00067688001	TPA_RAT	Tissue-type plasminogen activator	0	.
scaffold_149	812201	812300	chr_6	0	0	59.3163	2	open sea	-1585	GSONMT00067688001	TPA_RAT	Tissue-type plasminogen activator	0	.
scaffold_1490	70901	71000	chrUn	0	0	20.257	3	shore	0	GSONMT00053135001	F184A_HUMAN	Protein FAM184A	0	.
scaffold_1490	119001	119100	chrUn	0	0	19.7873	1	shore	0	GSONMT00053136001	MA1A1_RABIT	Mannosyl-oligosaccharide 1,2-alpha-mannosidase IA	3e-112	.
scaffold_1494	212901	213000	chrUn	0	0	23.3579	3	open sea	.	.	.	.	.	ID=RM832458;Name=RM832458;Note=Motif:CR1-26_DR
scaffold_14963	201	300	chrUn_14	0	0	25.2129	4	open sea	.	.	.	.	.	.
scaffold_14992	5701	5800	chrUn	0	0	19.742	3	shore	0	GSONMT00039195001	AMNLS_HUMAN	Protein amnionless	9e-71	.
scaffold_15	714601	714700	chrUn_22	0	0	19.8756	5	open sea	0	GSONMT00067730001	B3A3_CALMO	Anion exchange protein 3	1e-47	.
scaffold_15	819101	819200	chrUn_22	0	0	23.1431	2	open sea	0	GSONMT00067736001	IBP5_MOUSE	Insulin-like growth factor-binding protein 5	1e-94	.
scaffold_15	819401	819500	chrUn_22	0	0	83.651	4	open sea	0	GSONMT00067736001	IBP5_MOUSE	Insulin-like growth factor-binding protein 5	1e-94	.
scaffold_15	875001	875100	chrUn_22	0	0	64.142	2	shore	.	.	.	.	.	.
scaffold_15	917801	917900	chrUn_22	0	0	22.0653	14	island	.	.	.	.	.	ID=RM834764;Name=RM834764;Note=Motif:Gypsy72-I_DR-int
scaffold_15	917901	918000	chrUn_22	0	0	40.2043	8	island	.	.	.	.	.	.
scaffold_15	1664601	1664700	chrUn_22	0	0	46.6046	4	shore	0	GSONMT00067748001	NAB1_HUMAN	NGFI-A-binding protein 1	3e-108	.
scaffold_15	1886701	1886800	chrUn_22	0	0	22.8878	2	shelf	0	GSONMT00067761001	FRPD4_HUMAN	FERM and PDZ domain-containing protein 4	0	.
scaffold_15	1961301	1961400	chrUn_22	0	0	31.4245	5	island	9588	GSONMT00067762001	.	.	.	.
scaffold_15	2864301	2864400	chrUn_22	0	0	21.8256	5	shore	.	.	.	.	.	.
scaffold_15	2940501	2940600	chrUn_22	0	0	28.0937	2	open sea	0	GSONMT00067799001	TNR16_CHICK	Tumor necrosis factor receptor superfamily member 16	2e-81	.
scaffold_150	739501	739600	chrUn_6	0	0	20.0963	2	shelf	.	.	.	.	.	.
scaffold_150	947901	948000	chrUn_6	0	0	21.9892	5	shore	0	GSONMT00067848001	VPP2_MOUSE	V-type proton ATPase 116 kDa subunit a isoform 2	7e-26	.
scaffold_1500	123601	123700	chrUn_Sex	0	0	21.1694	3	shore	.	.	.	.	.	ID=RM837744;Name=RM837744;Note=Motif:Gypsy-24_GA-I-int
scaffold_15024	10901	11000	chrUn	0	0	23.4803	3	open sea	-4560	GSONMT00022707001	PRUNE_MOUSE	Protein prune homolog	3e-90	.
scaffold_1508	49501	49600	chrUn_12	0	0	49.6603	4	open sea	0	GSONMT00039651001	SRBP2_DANRE	Sterol regulatory element-binding protein 2	0	.
scaffold_1508	65901	66000	chrUn_12	0	0	20.5797	3	open sea	0	GSONMT00039655001	.	.	.	.
scaffold_1509	66301	66400	chrUn	0	0	24.6289	4	open sea	.	.	.	.	.	.
scaffold_1509	66401	66500	chrUn	0	0	25.0307	5	open sea	.	.	.	.	.	.
scaffold_15091	2801	2900	chrUn	0	0	-33.1266	6	shore	0	GSONMT00057766001	PCD17_HUMAN	Protocadherin-17	0	.
scaffold_15094	9401	9500	chrUn	0	0	33.5883	4	shore	0	GSONMT00054850001	TRIL_MOUSE	TLR4 interactor with leucine rich repeats	2e-129	.
scaffold_151	720901	721000	chrUn_12	0	0	20.0848	6	shelf	.	.	.	.	.	ID=RM840869;Name=RM840869;Note=Motif:REX1-1_DR
scaffold_151	1253301	1253400	chrUn_12	0	0	21.3707	3	open sea	-8287	GSONMT00067919001	SC4AB_DANRE	Sodium channel protein type 4 subunit alpha B	0	.
scaffold_151	1445601	1445700	chrUn_12	0	0	20.7767	4	open sea	.	.	.	.	.	.
scaffold_15107	8701	8800	chrUn	0	0	27.1633	2	open sea	.	.	.	.	.	.
scaffold_15118	8201	8300	chrUn	0	0	30.4048	3	open sea	.	.	.	.	.	ID=RM841988;Name=RM841988;Note=Motif:CR1-40_DR
scaffold_15129	4701	4800	chrUn	0	0	23.774	3	shelf	.	.	.	.	.	ID=RM842236;Name=RM842236;Note=Motif:TZF28C
scaffold_15132	11001	11100	chrUn	0	0	32.5374	9	shore	.	.	.	.	.	.
scaffold_15146	10301	10400	chrUn	0	0	43.6148	4	open sea	.	.	.	.	.	.
scaffold_15163	3001	3100	chrUn	0	0	21.696	4	shore	0	GSONMT00002336001	DOS_MOUSE	Protein Dos	1e-96	.
scaffold_15164	10401	10500	chrUn	0	0	25.0729	2	shore	.	.	.	.	.	ID=RM843213;Name=RM843213;Note=Motif:REX1-1_AFC
scaffold_1517	15801	15900	chrUn_23	0	0	24.1163	2	open sea	.	.	.	.	.	.
scaffold_15180	9101	9200	chrUn	0	0	44.9164	4	shelf	.	.	.	.	.	.
scaffold_152	149801	149900	chrUn_4	0	0	23.3569	4	open sea	.	.	.	.	.	.
scaffold_152	217101	217200	chrUn_4	0	0	24.8546	3	shore	-239	GSONMT00067937001	CRUM1_HUMAN	Protein crumbs homolog 1	4e-54	.
scaffold_152	1024101	1024200	chrUn_4	0	0	21.2927	4	shelf	8522	GSONMT00067951001	NIBAN_HUMAN	Protein Niban	2e-36	.
scaffold_152	1251501	1251600	chrUn_4	0	0	48.5887	3	open sea	0	GSONMT00067960001	MYOME_HUMAN	Myomegalin	2e-13	.
scaffold_1522	67701	67800	chrUn_22	0	0	29.6932	3	open sea	0	GSONMT00046250001	NF2L2_BOVIN	Nuclear factor erythroid 2-related factor 2	5e-119	.
scaffold_1522	208901	209000	chrUn_22	0	0	23.1645	9	shelf	.	.	.	.	.	.
scaffold_15230	10801	10900	chrUn	0	0	72.7363	3	open sea	.	.	.	.	.	.
scaffold_15237	8901	9000	chrUn	0	0	31.9101	2	open sea	.	.	.	.	.	.
scaffold_1525	113801	113900	chrUn_14	0	0	19.6185	4	open sea	.	.	.	.	.	.
scaffold_1527	12201	12300	chrUn	0	0	94.241	5	open sea	.	.	.	.	.	.
scaffold_1527	12301	12400	chrUn	0	0	87.8534	7	open sea	.	.	.	.	.	.
scaffold_1527	111601	111700	chrUn	0	0	31.9695	6	open sea	.	.	.	.	.	.
scaffold_1529	41801	41900	chrUn	0	0	24.3805	1	open sea	-9208	GSONMT00020010001	CA2D1_MOUSE	Voltage-dependent calcium channel subunit alpha-2/delta-1	0	.
scaffold_153	798001	798100	chrUn_24	0	0	33.1093	3	open sea	0	GSONMT00068022001	.	.	.	.
scaffold_153	974401	974500	chrUn_24	0	0	87.8297	6	shore	0	GSONMT00068036001	LTBP2_MOUSE	Latent-transforming growth factor beta-binding protein 2	3e-92	.
scaffold_153	1045101	1045200	chrUn_24	0	0	45.6269	5	open sea	.	.	.	.	.	.
scaffold_153	1427101	1427200	chrUn_24	0	0	73.6497	2	open sea	.	.	.	.	.	.
scaffold_153	1427201	1427300	chrUn_24	0	0	46.8752	5	open sea	.	.	.	.	.	.
scaffold_1530	117201	117300	chrUn	0	0	27.9902	3	open sea	3208	GSONMT00063720001	CLK4_HUMAN	Dual specificity protein kinase CLK4	0	.
scaffold_1531	176001	176100	chrUn	0	0	19.5836	5	shore	.	.	.	.	.	.
scaffold_1532	1701	1800	chrUn	0	0	-50.0242	3	shore	0	GSONMT00023145001	NEB2_RAT	Neurabin-2	2e-50	.
scaffold_1533	36501	36600	chrUn_27	0	0	-33.5958	4	shore	-8058	GSONMT00032019001	GNA11_XENLA	Guanine nucleotide-binding protein subunit alpha-11	1e-74	.
scaffold_1534	30201	30300	chrUn_1	0	0	19.603	3	island	.	.	.	.	.	ID=RM850099;Name=RM850099;Note=Motif:Gypsy62-I_DR-int
scaffold_1534	36301	36400	chrUn_1	0	0	21.652	0	open sea	.	.	.	.	.	ID=RM850109;Name=RM850109;Note=Motif:HATN11_DR
scaffold_15348	11101	11200	chrUn	0	0	20.1515	3	open sea	-6081	GSONMT00018720001	.	.	.	.
scaffold_1535	65801	65900	chrUn_2	0	0	27.979	3	open sea	.	.	.	.	.	.
scaffold_15378	601	700	chrUn	0	0	27.9683	5	shore	.	.	.	.	.	.
scaffold_1538	123201	123300	chrUn	0	0	76.0735	3	shelf	.	.	.	.	.	.
scaffold_1538	123301	123400	chrUn	0	0	79.253	3	shelf	.	.	.	.	.	.
scaffold_154	136401	136500	chrUn_12	0	0	28.085	4	island	0	GSONMT00068055001	DOC2B_RAT	Double C2-like domain-containing protein beta	8e-28	.
scaffold_154	411401	411500	chrUn_12	0	0	20.7294	2	shore	.	.	.	.	.	ID=RM851980;Name=RM851980;Note=Motif:Gypsy107-I_Dr-int
scaffold_1543	196701	196800	chrUn	0	0	30.3492	6	island	4892	GSONMT00008500001	CNTP5_CHICK	Contactin-associated protein-like 5	0	.
scaffold_1543	196801	196900	chrUn	0	0	40.9024	4	island	4792	GSONMT00008500001	CNTP5_CHICK	Contactin-associated protein-like 5	0	.
scaffold_1545	165101	165200	chrUn	0	0	22.0643	3	open sea	.	.	.	.	.	.
scaffold_15475	9801	9900	chrUn	0	0	37.9817	3	open sea	.	.	.	.	.	.
scaffold_1548	60601	60700	chrUn	0	0	22.3163	3	shore	.	.	.	.	.	ID=RM854831;Name=RM854831;Note=Motif:Gypsy-29_GA-I-int
scaffold_1548	200801	200900	chrUn	0	0	-24.7672	10	island	0	GSONMT00039015001	TEAD3_HUMAN	Transcriptional enhancer factor TEF-5	1e-52	.
scaffold_15499	10701	10800	chrUn	0	0	19.5755	4	shore	.	.	.	.	.	.
scaffold_155	13701	13800	chrUn_8	0	0	50.6588	4	shore	-2616	GSONMT00068080001	AIM1_HUMAN	Absent in melanoma 1 protein	2e-144	.
scaffold_155	1245601	1245700	chrUn_8	0	0	29.1574	3	shelf	.	.	.	.	.	ID=RM856081;Name=RM856081;Note=Motif:REX1-1_AFC
scaffold_15500	6801	6900	chrUn_5	0	0	25.6042	2	shelf	.	.	.	.	.	.
scaffold_1552	11501	11600	chrUn	0	0	20.0026	4	island	1984	GSONMT00018503001	EPHB1_RAT	Ephrin type-B receptor 1	0	.
scaffold_1553	95601	95700	chrUn_5	0	0	20.4616	3	shore	.	.	.	.	.	ID=RM857139;Name=RM857139;Note=Motif:Gypsy-10_GA-I-int
scaffold_15533	9901	10000	chrUn	0	0	32.7198	4	shelf	.	.	.	.	.	.
scaffold_1556	166401	166500	chrUn_2	0	0	30.1092	2	open sea	-3623	GSONMT00048875001	DUS6_BOVIN	Dual specificity protein phosphatase 6	0	.
scaffold_156	283401	283500	chrUn_22	0	0	-41.0368	8	island	0	GSONMT00068159001	TRI13_DANRE	Tripartite motif-containing 13	2e-149	.
scaffold_156	927601	927700	chrUn_22	0	0	24.251	7	shore	.	.	.	.	.	.
scaffold_156	1354601	1354700	chrUn_22	0	0	22.2606	4	open sea	.	.	.	.	.	.
scaffold_156	1441401	1441500	chrUn_22	0	0	26.4133	5	shore	-7399	GSONMT00068172001	TEFF2_BOVIN	Tomoregulin-2	7e-29	.
scaffold_15637	2201	2300	chrUn	0	0	19.6251	6	open sea	.	.	.	.	.	.
scaffold_1564	38001	38100	chrUn	0	0	35.3933	2	open sea	.	.	.	.	.	.
scaffold_1567	46401	46500	chrUn	0	0	27.1814	3	open sea	.	.	.	.	.	ID=RM861830;Name=RM861830;Note=Motif:Gypsy-35_GA-I-int
scaffold_1567	73401	73500	chrUn	0	0	23.0048	4	open sea	0	GSONMT00051628001	CNTN3_RAT	Contactin-3	0	.
scaffold_15683	3701	3800	chrUn	0	0	28.3742	2	open sea	.	.	.	.	.	.
scaffold_157	82501	82600	chrUn_5	0	0	28.2941	6	open sea	0	GSONMT00068174001	MAST4_HUMAN	Microtubule-associated serine/threonine-protein kinase 4	0	.
scaffold_157	831301	831400	chrUn_5	0	0	21.0102	2	shore	.	.	.	.	.	ID=RM863292;Name=RM863292;Note=Motif:CR1-40_DR
scaffold_1570	185101	185200	chrUn	0	0	25.4713	4	island	.	.	.	.	.	ID=RM863978;Name=RM863978;Note=Motif:Gypsy88-I_DR-int
scaffold_1571	15301	15400	chrUn	0	0	21.7122	1	open sea	-7103	GSONMT00003523001	MGT5B_HUMAN	Alpha-1,6-mannosylglycoprotein 6-beta-N-acetylglucosaminyltransferase B	0	.
scaffold_1571	65401	65500	chrUn	0	0	20.5921	2	open sea	0	GSONMT00003523001	MGT5B_HUMAN	Alpha-1,6-mannosylglycoprotein 6-beta-N-acetylglucosaminyltransferase B	0	.
scaffold_1574	301	400	chrUn_20	0	0	23.6484	4	open sea	.	.	.	.	.	.
scaffold_1574	701	800	chrUn_20	0	0	23.5713	6	open sea	.	.	.	.	.	.
scaffold_158	183801	183900	chrUn_17	0	0	20.9183	7	open sea	0	GSONMT00068219001	IFFO2_MOUSE	Intermediate filament family orphan 2	4e-156	.
scaffold_158	795901	796000	chrUn_17	0	0	19.7831	3	shore	.	.	.	.	.	ID=RM866790;Name=RM866790;Note=Motif:REX1-1_AFC
scaffold_1581	27501	27600	chrUn	0	0	21.6943	1	shore	0	GSONMT00053984001	SLIK5_HUMAN	SLIT and NTRK-like protein 5	0	.
scaffold_15823	801	900	chrUn	0	0	29.5542	2	open sea	.	.	.	.	.	ID=RM867849;Name=RM867849;Note=Motif:TC1_FR3
scaffold_1586	82001	82100	chrUn_6	0	0	21.5111	4	shore	.	.	.	.	.	.
scaffold_1588	175201	175300	chrUn	0	0	25.1346	2	open sea	.	.	.	.	.	ID=RM869351;Name=RM869351;Note=Motif:REX1-1_AFC
scaffold_1589	35301	35400	chrUn	0	0	25.7472	2	shelf	.	.	.	.	.	.
scaffold_15892	3701	3800	chrUn	0	0	23.7116	2	shore	.	.	.	.	.	.
scaffold_159	928301	928400	chrUn_27	0	0	24.7325	4	open sea	.	.	.	.	.	ID=RM870413;Name=RM870413;Note=Motif:Gypsy-10_GA-I-int
scaffold_159	1165801	1165900	chrUn_27	0	0	19.7527	2	shelf	.	.	.	.	.	.
scaffold_1593	47101	47200	chrUn	0	0	-59.2337	5	open sea	.	.	.	.	.	.
scaffold_15933	10301	10400	chrUn	0	0	21.9434	3	open sea	.	.	.	.	.	.
scaffold_1597	154801	154900	chrUn	0	0	20.4636	5	island	9215	GSONMT00028552001	.	.	.	.
scaffold_15976	9201	9300	chrUn	0	0	19.7355	3	shore	.	.	.	.	.	.
scaffold_16	257601	257700	chrUn_12	0	0	21.7322	5	shore	.	.	.	.	.	ID=RM873214;Name=RM873214;Note=Motif:REX1-1_AFC
scaffold_16	1607801	1607900	chrUn_12	0	0	30.3425	1	open sea	0	GSONMT00068387001	RFIP1_HUMAN	Rab11 family-interacting protein 1	5e-14	.
scaffold_16	1698401	1698500	chrUn_12	0	0	38.5698	4	shore	0	GSONMT00068393001	ANXA4_BOVIN	Annexin A4	4e-28	.
scaffold_16	1999001	1999100	chrUn_12	0	0	-60.3436	5	shore	0	GSONMT00068409001	PCDGM_HUMAN	Protocadherin gamma-C5	4e-132	.
scaffold_16	2074801	2074900	chrUn_12	0	0	-25.0372	6	shore	0	GSONMT00068412001	PCDC2_HUMAN	Protocadherin alpha-C2	0	.
scaffold_16	2430801	2430900	chrUn_12	0	0	27.3478	3	shelf	.	.	.	.	.	.
scaffold_16	2552401	2552500	chrUn_12	0	0	23.7127	2	open sea	.	.	.	.	.	ID=RM874885;Name=RM874885;Note=Motif:Gypsy97-I_DR-int
scaffold_16	2828301	2828400	chrUn_12	0	0	19.6768	2	shelf	.	.	.	.	.	.
scaffold_160	885501	885600	chrUn_8	0	0	30.7862	2	shelf	.	.	.	.	.	.
scaffold_1600	159401	159500	chrUn_27	0	0	66.0113	7	open sea	0	GSONMT00029471001	AP3D1_MOUSE	AP-3 complex subunit delta-1	0	.
scaffold_16009	201	300	chrUn	0	0	39.3549	5	open sea	.	.	.	.	.	.
scaffold_16034	8801	8900	chrUn	0	0	47.9056	5	shore	.	.	.	.	.	.
scaffold_16052	1601	1700	chrUn	0	0	24.0136	3	open sea	.	.	.	.	.	.
scaffold_1606	191201	191300	chrUn_7	0	0	20.8942	4	open sea	6885	GSONMT00049516001	.	.	.	.
scaffold_161	481101	481200	chrUn_2	0	0	23.3946	3	shore	.	.	.	.	.	ID=RM879057;Name=RM879057;Note=Motif:Gypsy-47_GA-I-int
scaffold_161	483101	483200	chrUn_2	0	0	19.5499	5	shore	.	.	.	.	.	.
scaffold_161	483201	483300	chrUn_2	0	0	23.5502	7	shore	.	.	.	.	.	.
scaffold_1610	175201	175300	chrUn_3	0	0	43.526	3	open sea	0	GSONMT00009349001	RSPO1_DANRE	R-spondin-1	2e-109	.
scaffold_16101	8001	8100	chrUn	0	0	20.8867	4	open sea	.	.	.	.	.	.
scaffold_1611	142801	142900	chr_12	0	0	-95.1485	4	shelf	.	.	.	.	.	.
scaffold_16114	10101	10200	chrUn	0	0	27.9483	5	open sea	1283	GSONMT00020413001	A4_TAKRU	Amyloid beta A4 protein	5e-58	.
scaffold_1612	120101	120200	chrUn_Sex	0	0	42.7689	4	shore	0	GSONMT00000075001	ENDD1_MOUSE	Endonuclease domain-containing 1 protein	1e-19	.
scaffold_1612	120601	120700	chrUn_Sex	0	0	21.1229	5	shore	0	GSONMT00000075001	ENDD1_MOUSE	Endonuclease domain-containing 1 protein	1e-19	.
scaffold_16128	3501	3600	chrUn	0	0	19.7701	4	shore	.	.	.	.	.	ID=RM880515;Name=RM880515;Note=Motif:Gypsy-10_GA-I-int
scaffold_1613	34601	34700	chrUn	0	0	23.1739	4	open sea	0	GSONMT00042265001	TM121_CHICK	Transmembrane protein 121	4e-153	.
scaffold_1613	91201	91300	chrUn	0	0	19.9434	7	island	2925	GSONMT00042268001	RM02_HUMAN	39S ribosomal protein L2, mitochondrial	5e-36	.
scaffold_1613	189601	189700	chrUn	0	0	29.2636	5	open sea	-3059	GSONMT00042274001	ACTC_RAT	Actin, alpha cardiac muscle 1	0	.
scaffold_16168	9701	9800	chrUn	0	0	33.4103	4	open sea	.	.	.	.	.	.
scaffold_1617	40301	40400	chrUn_16	0	0	25.3594	4	shelf	.	.	.	.	.	.
scaffold_1619	97401	97500	chrUn	0	0	26.2326	3	open sea	.	.	.	.	.	.
scaffold_162	385001	385100	chrUn_19	0	0	21.5625	6	island	0	GSONMT00068554001	KPCD1_HUMAN	Serine/threonine-protein kinase D1	0	.
scaffold_162	567201	567300	chrUn_19	0	0	-64.2688	5	open sea	0	GSONMT00068557001	SPTN5_HUMAN	Spectrin beta chain, non-erythrocytic 5	0	.
scaffold_162	1044401	1044500	chrUn_19	0	0	24.5187	4	open sea	.	.	.	.	.	.
scaffold_162	1350401	1350500	chrUn_19	0	0	27.948	2	open sea	.	.	.	.	.	.
scaffold_1620	189201	189300	chrUn_3	0	0	39.5248	5	open sea	.	.	.	.	.	.
scaffold_1621	22801	22900	chrUn	0	0	24.6858	5	open sea	0	GSONMT00058003001	MIDN_DANRE	Midnolin	2e-52	.
scaffold_1626	64001	64100	chrUn	0	0	27.8682	4	open sea	.	.	.	.	.	.
scaffold_1627	61901	62000	chrUn	0	0	20.8797	2	island	.	.	.	.	.	.
scaffold_16283	4001	4100	chrUn	0	0	22.8113	4	shore	0	GSONMT00047834001	DYH2_HUMAN	Dynein heavy chain 2, axonemal	1e-95	.
scaffold_16287	7901	8000	chrUn	0	0	38.4974	7	island	.	.	.	.	.	.
scaffold_163	542401	542500	chrUn_1	0	0	23.2973	3	open sea	.	.	.	.	.	.
scaffold_163	734701	734800	chrUn_1	0	0	56.0175	3	open sea	0	GSONMT00068592001	I5P1_HUMAN	Type I inositol 1,4,5-trisphosphate 5-phosphatase	4e-154	.
scaffold_163	734801	734900	chrUn_1	0	0	27.1686	6	open sea	0	GSONMT00068592001	I5P1_HUMAN	Type I inositol 1,4,5-trisphosphate 5-phosphatase	4e-154	.
scaffold_163	933201	933300	chrUn_1	0	0	69.7285	5	open sea	.	.	.	.	.	.
scaffold_1630	34501	34600	chrUn	0	0	20.2802	1	shore	.	.	.	.	.	.
scaffold_1632	120901	121000	chrUn	0	0	21.4503	5	open sea	-5480	GSONMT00039314001	DHDH_DANRE	Trans-1,2-dihydrobenzene-1,2-diol dehydrogenase	4e-161	.
scaffold_1633	125901	126000	chrUn	0	0	38.8578	10	island	.	.	.	.	.	.
scaffold_16344	2601	2700	chrUn	0	0	35.4917	6	shore	.	.	.	.	.	ID=RM888097;Name=RM888097;Note=Motif:Gypsy-10_GA-I-int
scaffold_16344	2701	2800	chrUn	0	0	36.7875	7	island	.	.	.	.	.	ID=RM888097;Name=RM888097;Note=Motif:Gypsy-10_GA-I-int
scaffold_16347	9001	9100	chrUn	0	0	22.4914	6	open sea	.	.	.	.	.	.
scaffold_1635	15001	15100	chrUn	0	0	78.1423	8	island	-6897	GSONMT00025665001	KDM6B_MOUSE	Lysine-specific demethylase 6B	0	.
scaffold_1637	26101	26200	chrUn_20	0	0	24.971	2	shelf	0	GSONMT00034867001	LDB3_MOUSE	LIM domain-binding protein 3	4e-20	.
scaffold_16378	7001	7100	chrUn	0	0	20.9939	6	shore	.	.	.	.	.	.
scaffold_1638	107401	107500	chrUn	0	0	23.7088	4	open sea	.	.	.	.	.	.
scaffold_164	301001	301100	chrUn_8	0	0	23.8819	2	shelf	.	.	.	.	.	.
scaffold_164	1207301	1207400	chrUn_8	0	0	25.5785	4	open sea	.	.	.	.	.	.
scaffold_16422	4001	4100	chrUn	0	0	32.7801	1	open sea	-4216	GSONMT00028726001	.	.	.	.
scaffold_1644	174601	174700	chrUn	0	0	20.8511	5	open sea	.	.	.	.	.	.
scaffold_16485	1101	1200	chrUn	0	0	23.2476	2	open sea	0	GSONMT00046861001	ISLR2_MOUSE	Immunoglobulin superfamily containing leucine-rich repeat protein 2	2e-81	.
scaffold_16485	10001	10100	chrUn	0	0	26.9649	4	island	3936	GSONMT00046861001	ISLR2_MOUSE	Immunoglobulin superfamily containing leucine-rich repeat protein 2	2e-81	.
scaffold_165	687401	687500	chrUn_22	0	0	21.6885	4	open sea	.	.	.	.	.	.
scaffold_165	715201	715300	chrUn_22	0	0	31.5038	4	open sea	.	.	.	.	.	.
scaffold_165	937401	937500	chrUn_22	0	0	25.8222	1	open sea	-6370	GSONMT00068679001	ARP3_TAKRU	Actin-related protein 3	0	.
scaffold_1650	55001	55100	chr_3	0	0	-35.6551	5	open sea	-679	GSONMT00035007001	CEP85_HUMAN	Centrosomal protein of 85 kDa	4e-162	.
scaffold_1652	109101	109200	chrUn_27	0	0	46.8739	8	island	.	.	.	.	.	.
scaffold_16558	5601	5700	chrUn	0	0	22.509	2	shore	0	GSONMT00036985001	RBM20_HUMAN	RNA-binding protein 20	7e-22	.
scaffold_1658	15201	15300	chrUn	0	0	20.3123	6	open sea	.	.	.	.	.	.
scaffold_1658	51301	51400	chrUn	0	0	23.8719	3	shore	.	.	.	.	.	ID=RM895886;Name=RM895886;Note=Motif:Gypsy-10_GA-I-int
scaffold_166	167401	167500	chrUn_1	0	0	27.3416	3	open sea	.	.	.	.	.	ID=RM896382;Name=RM896382;Note=Motif:CR1-40_DR
scaffold_166	209601	209700	chrUn_1	0	0	19.7929	2	open sea	.	.	.	.	.	.
scaffold_1661	7201	7300	chrUn	0	0	19.5956	5	open sea	.	.	.	.	.	.
scaffold_1661	27201	27300	chrUn	0	0	22.5415	3	open sea	.	.	.	.	.	.
scaffold_1662	182101	182200	chrUn	0	0	42.8705	5	island	.	.	.	.	.	.
scaffold_16620	7301	7400	chrUn	0	0	20.0974	3	shore	0	GSONMT00042334001	VWA7_HUMAN	von Willebrand factor A domain-containing protein 7	8e-39	.
scaffold_16655	6001	6100	chrUn	0	0	-26.4088	6	island	.	.	.	.	.	.
scaffold_16655	6101	6200	chrUn	0	0	-24.6495	7	island	.	.	.	.	.	.
scaffold_16655	6201	6300	chrUn	0	0	-22.4986	4	island	.	.	.	.	.	.
scaffold_16655	6501	6600	chrUn	0	0	-27.8187	9	island	.	.	.	.	.	.
scaffold_16671	1401	1500	chrUn	0	0	-69.3029	10	shore	0	GSONMT00015832001	.	.	.	.
scaffold_1672	174301	174400	chrUn	0	0	25.4019	1	shelf	.	.	.	.	.	ID=RM901558;Name=RM901558;Note=Motif:Gypsy70-I_DR-int
scaffold_16730	7101	7200	chrUn	0	0	60.9336	1	shelf	.	.	.	.	.	.
scaffold_1674	114301	114400	chrUn	0	0	24.6629	2	shelf	0	GSONMT00026109001	AEBP1_HUMAN	Adipocyte enhancer-binding protein 1	0	.
scaffold_1674	114601	114700	chrUn	0	0	48.7373	2	shelf	0	GSONMT00026109001	AEBP1_HUMAN	Adipocyte enhancer-binding protein 1	0	.
scaffold_16751	5901	6000	chrUn	0	0	19.5365	4	shore	.	.	.	.	.	.
scaffold_16751	6001	6100	chrUn	0	0	48.824	2	shore	.	.	.	.	.	ID=RM902410;Name=RM902410;Note=Motif:Gypsy-28_GA-I-int
scaffold_16751	6101	6200	chrUn	0	0	38.877	6	shelf	.	.	.	.	.	ID=RM902410;Name=RM902410;Note=Motif:Gypsy-28_GA-I-int
scaffold_16751	6301	6400	chrUn	0	0	30.5848	5	shelf	.	.	.	.	.	.
scaffold_1677	127401	127500	chrUn	0	0	24.7835	2	shore	-2457	GSONMT00014404001	LRAT_BOVIN	Lecithin retinol acyltransferase	2e-83	.
scaffold_1677	127501	127600	chrUn	0	0	25.2607	3	shore	-2357	GSONMT00014404001	LRAT_BOVIN	Lecithin retinol acyltransferase	2e-83	.
scaffold_1678	16301	16400	chrUn	0	0	25.5783	5	shore	-6163	GSONMT00048522001	.	.	.	.
scaffold_168	616401	616500	chrUn_2	0	0	40.9893	7	open sea	.	.	.	.	.	.
scaffold_168	616501	616600	chrUn_2	0	0	52.4153	3	open sea	.	.	.	.	.	.
scaffold_168	885501	885600	chrUn_2	0	0	22.8502	4	open sea	-6163	GSONMT00068807001	GNRR2_CHLAE	Gonadotropin-releasing hormone II receptor	2e-107	.
scaffold_168	885601	885700	chrUn_2	0	0	28.8109	6	open sea	-6263	GSONMT00068807001	GNRR2_CHLAE	Gonadotropin-releasing hormone II receptor	2e-107	.
scaffold_168	1124601	1124700	chrUn_2	0	0	24.1521	4	shore	-2658	GSONMT00068813001	SIA8B_HUMAN	Alpha-2,8-sialyltransferase 8B	4e-175	.
scaffold_1682	59801	59900	chrUn	0	0	36.1121	5	shore	0	GSONMT00037314001	PWP2A_MOUSE	PWWP domain-containing protein 2A	6e-51	.
scaffold_1682	69101	69200	chrUn	0	0	19.5	4	open sea	0	GSONMT00037316001	CCNJ_MOUSE	Cyclin-J	2e-87	.
scaffold_16824	5501	5600	chrUn	0	0	25.5632	5	shelf	.	.	.	.	.	.
scaffold_16829	7601	7700	chrUn	0	0	-20.3385	4	shore	-1223	GSONMT00028719001	DCC_HUMAN	Netrin receptor DCC	1e-39	.
scaffold_1684	20401	20500	chrUn	0	0	42.8333	4	open sea	.	.	.	.	.	.
scaffold_16861	8801	8900	chrUn	0	0	20.1663	2	shore	.	.	.	.	.	ID=RM905910;Name=RM905910;Note=Motif:Sushi_I-int
scaffold_1690	5801	5900	chrUn	0	0	26.7908	4	shore	.	.	.	.	.	.
scaffold_1690	5901	6000	chrUn	0	0	79.0334	3	shore	.	.	.	.	.	.
scaffold_1690	6001	6100	chrUn	0	0	95.985	3	shore	.	.	.	.	.	.
scaffold_1690	70001	70100	chrUn	0	0	45.5426	3	shore	.	.	.	.	.	.
scaffold_16902	9201	9300	chrUn	0	0	71.8808	5	open sea	.	.	.	.	.	.
scaffold_1691	1601	1700	chrUn	0	0	21.844	6	shore	.	.	.	.	.	.
scaffold_1692	98501	98600	chrUn_5	0	0	27.1822	4	open sea	.	.	.	.	.	.
scaffold_1692	98601	98700	chrUn_5	0	0	26.4902	2	open sea	.	.	.	.	.	.
scaffold_1692	153701	153800	chrUn_5	0	0	50.6015	4	shore	.	.	.	.	.	.
scaffold_1694	158001	158100	chrUn	0	0	-20.5593	8	island	-1081	GSONMT00052302001	NPRL3_MOUSE	Nitrogen permease regulator 3-like protein	0	.
scaffold_1696	9301	9400	chrUn	0	0	38.5648	2	open sea	-257	GSONMT00027433001	CH037_MOUSE	Protein C8orf37 homolog	4e-38	.
scaffold_16964	2101	2200	chrUn	0	0	35.3084	1	shore	0	GSONMT00044366001	SEM3D_HUMAN	Semaphorin-3D	5e-21	.
scaffold_1698	164301	164400	chrUn	0	0	21.8185	6	island	0	GSONMT00054555001	NRX2B_RAT	Neurexin-2-beta	1e-65	.
scaffold_1699	95701	95800	chrUn	0	0	40.897	1	shore	.	.	.	.	.	.
scaffold_17	131801	131900	chrUn_15	0	0	31.6243	4	open sea	.	.	.	.	.	.
scaffold_17	131901	132000	chrUn_15	0	0	26.3276	5	open sea	.	.	.	.	.	.
scaffold_170	206901	207000	chrUn_23	0	0	57.2906	3	open sea	6028	GSONMT00068971001	.	.	.	.
scaffold_170	207001	207100	chrUn_23	0	0	72.0662	5	open sea	6128	GSONMT00068971001	.	.	.	.
scaffold_17006	9101	9200	chrUn	0	0	67.2578	5	open sea	.	.	.	.	.	.
scaffold_1701	1201	1300	chrUn	0	0	24.3051	5	island	-3429	GSONMT00053314001	BTBD2_HUMAN	BTB/POZ domain-containing protein 2	0	.
scaffold_1701	24201	24300	chrUn	0	0	34.2736	4	island	-5649	GSONMT00053315001	EF2_CHICK	Elongation factor 2	0	.
scaffold_1701	52701	52800	chrUn	0	0	19.862	4	open sea	.	.	.	.	.	ID=RM913576;Name=RM913576;Note=Motif:REX1-1_AFC
scaffold_1702	12701	12800	chrUn	0	0	23.0809	5	open sea	.	.	.	.	.	.
scaffold_1702	12801	12900	chrUn	0	0	28.6878	4	open sea	.	.	.	.	.	.
scaffold_17042	801	900	chrUn	0	0	28.0923	6	open sea	.	.	.	.	.	.
scaffold_17087	6601	6700	chrUn	0	0	19.8838	3	shore	.	.	.	.	.	ID=RM915320;Name=RM915320;Note=Motif:Gypsy-10_GA-I-int
scaffold_1709	147801	147900	chrUn_19	0	0	31.889	11	island	.	.	.	.	.	.
scaffold_171	498301	498400	chrUn_8	0	0	21.5993	6	shore	0	GSONMT00069020001	TMX3_XENLA	Protein disulfide-isomerase TMX3	6e-20	.
scaffold_171	600801	600900	chrUn_8	0	0	19.8053	4	shore	.	.	.	.	.	ID=RM915863;Name=RM915863;Note=Motif:Gypsy-29_GA-I-int
scaffold_171	1190401	1190500	chrUn_8	0	0	46.2046	8	shore	.	.	.	.	.	.
scaffold_1715	147001	147100	chrUn	0	0	20.5517	5	island	.	.	.	.	.	.
scaffold_17150	1801	1900	chrUn	0	0	-54.865	6	shore	.	.	.	.	.	.
scaffold_1716	133701	133800	chrUn_11	0	0	44.743	4	open sea	.	.	.	.	.	.
scaffold_17169	9001	9100	chrUn	0	0	32.8589	2	shore	.	.	.	.	.	.
scaffold_172	938301	938400	chrUn_8	0	0	27.8213	7	open sea	-1993	GSONMT00069080001	REPS1_HUMAN	RalBP1-associated Eps domain-containing protein 1	0	.
scaffold_172	965301	965400	chrUn_8	0	0	20.2403	3	shore	8912	GSONMT00069084001	TXLNB_CHICK	Beta-taxilin	5e-113	.
scaffold_1722	26801	26900	chrUn_8	0	0	24.455	8	island	0	GSONMT00030284001	MYSS_CYPCA	Myosin heavy chain, fast skeletal muscle	8e-14	.
scaffold_1723	134501	134600	chrUn_5	0	0	36.5056	4	shore	0	GSONMT00023517001	ZFY16_MOUSE	Zinc finger FYVE domain-containing protein 16	3e-155	.
scaffold_1723	134601	134700	chrUn_5	0	0	52.5739	6	shore	0	GSONMT00023517001	ZFY16_MOUSE	Zinc finger FYVE domain-containing protein 16	3e-155	.
scaffold_1726	71501	71600	chrUn_21	0	0	29.9809	5	open sea	.	.	.	.	.	.
scaffold_173	98501	98600	chrUn_17	0	0	-42.2478	7	open sea	.	.	.	.	.	.
scaffold_173	236901	237000	chrUn_17	0	0	23.1614	9	island	-7839	GSONMT00069105001	TCF15_CHICK	Transcription factor 15	2e-76	.
scaffold_173	339601	339700	chrUn_17	0	0	25.4856	6	open sea	.	.	.	.	.	.
scaffold_1732	178501	178600	chrUn	0	0	21.2355	2	open sea	.	.	.	.	.	ID=RM923198;Name=RM923198;Note=Motif:Gypsy64-I_DR-int
scaffold_174	621801	621900	chrUn_Sex	0	0	21.6725	1	open sea	0	GSONMT00069186001	PACS1_HUMAN	Phosphofurin acidic cluster sorting protein 1	0	.
scaffold_174	1135001	1135100	chrUn_Sex	0	0	19.7451	1	open sea	0	GSONMT00069208001	TANC2_HUMAN	Protein TANC2	5e-27	.
scaffold_174	1337101	1337200	chrUn_Sex	0	0	95.0113	3	open sea	0	GSONMT00069221001	MKL1_HUMAN	MKL/myocardin-like protein 1	3e-66	.
scaffold_1740	58601	58700	chr_11	0	0	21.5869	3	shore	0	GSONMT00062911001	KIF27_HUMAN	Kinesin-like protein KIF27	6e-45	.
scaffold_17408	5101	5200	chrUn	0	0	19.6843	3	open sea	.	.	.	.	.	ID=RM926135;Name=RM926135;Note=Motif:CR1-40_DR
scaffold_17429	3901	4000	chrUn	0	0	31.9104	2	shore	.	.	.	.	.	.
scaffold_1743	15401	15500	chrUn_10	0	0	27.0684	6	open sea	.	.	.	.	.	.
scaffold_1748	108101	108200	chrUn_29	0	0	27.3923	3	open sea	0	GSONMT00049314001	CAPS1_HUMAN	Calcium-dependent secretion activator 1	0	.
scaffold_1749	112401	112500	chrUn_24	0	0	63.9229	4	open sea	.	.	.	.	.	.
scaffold_17490	6701	6800	chrUn	0	0	-36.5713	6	island	.	.	.	.	.	.
scaffold_175	543701	543800	chrUn_8	0	0	94.8047	4	open sea	.	.	.	.	.	.
scaffold_175	676301	676400	chrUn_8	0	0	21.5965	3	open sea	.	.	.	.	.	ID=RM928686;Name=RM928686;Note=Motif:TZF28B
scaffold_175	1279301	1279400	chrUn_8	0	0	24.7845	2	open sea	.	.	.	.	.	.
scaffold_175	1296401	1296500	chrUn_8	0	0	20.1838	3	open sea	-6703	GSONMT00069263001	ASI1C_DANRE	Acid-sensing ion channel 1	0	.
scaffold_17514	3201	3300	chrUn	0	0	55.2702	5	open sea	.	.	.	.	.	.
scaffold_1755	14901	15000	chrUn	0	0	46.4977	3	open sea	.	.	.	.	.	.
scaffold_1756	64201	64300	chrUn_10	0	0	21.0109	2	shelf	.	.	.	.	.	ID=RM930517;Name=RM930517;Note=Motif:Gypsy-35_GA-I-int
scaffold_17567	7901	8000	chrUn	0	0	20.8246	1	open sea	.	.	.	.	.	.
scaffold_17567	8101	8200	chrUn	0	0	20.2023	3	open sea	.	.	.	.	.	ID=RM930674;Name=RM930674;Note=Motif:CR1-40_DR
scaffold_17632	8401	8500	chrUn	0	0	22.2652	6	open sea	.	.	.	.	.	.
scaffold_1766	9901	10000	chrUn	0	0	21.9424	4	shore	.	.	.	.	.	.
scaffold_177	32701	32800	chrUn	0	0	20.2816	4	shore	6250	GSONMT00069350001	KS6A4_MOUSE	Ribosomal protein S6 kinase alpha-4	1e-53	.
scaffold_177	465201	465300	chrUn	0	0	20.2364	6	island	-2713	GSONMT00069396001	.	.	.	.
scaffold_177	465901	466000	chrUn	0	0	34.1258	4	shore	-3413	GSONMT00069396001	.	.	.	.
scaffold_177	868001	868100	chrUn	0	0	25.3367	5	shore	-6796	GSONMT00069417001	FUND1_CHICK	FUN14 domain-containing protein 1	9e-57	.
scaffold_1773	151101	151200	chrUn_5	0	0	31.9846	5	open sea	.	.	.	.	.	.
scaffold_1774	5601	5700	chrUn	0	0	19.8552	2	open sea	2129	GSONMT00054830001	GEPH_MOUSE	Gephyrin	3e-105	.
scaffold_178	281201	281300	chrUn_16	0	0	23.7543	4	open sea	5915	GSONMT00069438001	TECTB_HUMAN	Beta-tectorin	4e-82	.
scaffold_178	281301	281400	chrUn_16	0	0	21.0774	2	open sea	6015	GSONMT00069438001	TECTB_HUMAN	Beta-tectorin	4e-82	.
scaffold_178	653301	653400	chrUn_16	0	0	26.4212	6	island	.	.	.	.	.	.
scaffold_1784	101101	101200	chrUn	0	0	23.7921	8	shore	.	.	.	.	.	.
scaffold_179	439501	439600	chr_10	0	0	48.5842	9	island	0	GSONMT00069509001	INS1A_DANRE	Insulinoma-associated protein 1a	2e-66	.
scaffold_179	562801	562900	chr_10	0	0	36.5902	3	open sea	0	GSONMT00069512001	KS6A4_MOUSE	Ribosomal protein S6 kinase alpha-4	0	.
scaffold_179	749901	750000	chr_10	0	0	-25.5488	8	shelf	-3618	GSONMT00069533001	ERR3_RAT	Estrogen-related receptor gamma	3e-167	.
scaffold_1792	29301	29400	chrUn	0	0	20.7251	7	open sea	2431	GSONMT00029315001	DX39A_MOUSE	ATP-dependent RNA helicase DDX39A	8e-117	.
scaffold_1794	36101	36200	chrUn_17	0	0	29.0067	3	open sea	0	GSONMT00060692001	SEPT9_MOUSE	Septin-9	4e-11	.
scaffold_17955	1601	1700	chrUn	0	0	27.1703	9	island	.	.	.	.	.	.
scaffold_17955	1701	1800	chrUn	0	0	22.3606	6	island	.	.	.	.	.	.
scaffold_1799	29201	29300	chrUn_14	0	0	24.0122	2	open sea	-8372	GSONMT00055932001	KCNK9_XENLA	Potassium channel subfamily K member 9	1e-132	.
scaffold_18	295301	295400	chrUn_3	0	0	22.32	1	open sea	0	GSONMT00069579001	NEB1_HUMAN	Neurabin-1	5e-125	.
scaffold_18	931001	931100	chrUn_3	0	0	22.9489	2	shore	0	GSONMT00069615001	LRP2_HUMAN	Low-density lipoprotein receptor-related protein 2	0	.
scaffold_18	1426501	1426600	chrUn_3	0	0	27.1845	5	open sea	0	GSONMT00069637001	GRB14_HUMAN	Growth factor receptor-bound protein 14	0	.
scaffold_18	1658401	1658500	chrUn_3	0	0	25.8565	2	shore	9508	GSONMT00069642001	KCNH7_HUMAN	Potassium voltage-gated channel subfamily H member 7	2e-22	.
scaffold_18	2397201	2397300	chrUn_3	0	0	78.1801	5	shore	.	.	.	.	.	.
scaffold_18	2695401	2695500	chrUn_3	0	0	-52.4221	8	shelf	0	GSONMT00069687001	NR4A2_BOVIN	Nuclear receptor subfamily 4 group A member 2	0	.
scaffold_180	1083201	1083300	chrUn_18	0	0	60.4225	1	open sea	0	GSONMT00069726001	NFAC1_PIG	Nuclear factor of activated T-cells, cytoplasmic 1	2e-29	.
scaffold_1803	148201	148300	chrUn_18	0	0	31.7537	5	open sea	0	GSONMT00058801001	RHG20_HUMAN	Rho GTPase-activating protein 20	1e-131	.
scaffold_1805	117301	117400	chrUn	0	0	24.1771	3	open sea	.	.	.	.	.	.
scaffold_1808	8801	8900	chrUn	0	0	19.8664	6	open sea	-3571	GSONMT00002416001	TM182_DANRE	Transmembrane protein 182	4e-45	.
scaffold_18099	501	600	chrUn_3	0	0	27.3658	5	open sea	.	.	.	.	.	.
scaffold_181	967001	967100	chrUn_5	0	0	21.6204	5	open sea	0	GSONMT00069756001	NOTC1_DANRE	Neurogenic locus notch homolog protein 1	0	.
scaffold_181	1306701	1306800	chrUn_5	0	0	25.9467	3	open sea	.	.	.	.	.	.
scaffold_18132	501	600	chrUn	0	0	84.5952	7	open sea	.	.	.	.	.	.
scaffold_18156	6501	6600	chrUn	0	0	29.5504	6	open sea	.	.	.	.	.	.
scaffold_18174	601	700	chrUn	0	0	22.9453	9	island	.	.	.	.	.	.
scaffold_182	191401	191500	chrUn_20	0	0	61.4493	3	open sea	-6193	GSONMT00069777001	ANGT_RAT	Angiotensinogen	6e-56	.
scaffold_182	962001	962100	chrUn_20	0	0	28.8694	1	open sea	.	.	.	.	.	ID=RM952372;Name=RM952372;Note=Motif:CR1-40_DR
scaffold_1820	93301	93400	chrUn	0	0	-39.6802	10	island	0	GSONMT00026056001	D19L3_MOUSE	Probable C-mannosyltransferase DPY19L3	5e-173	.
scaffold_18213	4601	4700	chrUn	0	0	21.5664	2	shore	.	.	.	.	.	ID=RM953056;Name=RM953056;Note=Motif:REX1-1_AFC
scaffold_1822	32201	32300	chrUn	0	0	19.9599	3	open sea	.	.	.	.	.	.
scaffold_18294	1401	1500	chrUn	0	0	35.0391	6	open sea	.	.	.	.	.	.
scaffold_183	20201	20300	chrUn	0	0	26.7785	2	shelf	.	.	.	.	.	ID=RM954833;Name=RM954833;Note=Motif:CR1-24_DR
scaffold_183	991301	991400	chrUn	0	0	46.5832	7	open sea	0	GSONMT00069855001	GRIA2_PONAB	Glutamate receptor 2	0	.
scaffold_183	1098201	1098300	chrUn	0	0	68.8213	3	shelf	-7329	GSONMT00069858001	PDGFC_GECJA	Platelet-derived growth factor C	1e-166	.
scaffold_18335	8401	8500	chrUn	0	0	21.5273	3	open sea	.	.	.	.	.	.
scaffold_18338	101	200	chrUn	0	0	26.9837	2	open sea	.	.	.	.	.	.
scaffold_1834	98801	98900	chrUn	0	0	30.3388	2	shore	5759	GSONMT00007410001	PCLO_MOUSE	Protein piccolo	6e-27	.
scaffold_1836	105801	105900	chrUn	0	0	23.1744	5	shore	6459	GSONMT00002769001	GRIA4_HUMAN	Glutamate receptor 4	0	.
scaffold_1836	105901	106000	chrUn	0	0	27.5295	8	island	6559	GSONMT00002769001	GRIA4_HUMAN	Glutamate receptor 4	0	.
scaffold_184	174901	175000	chrUn_1	0	0	23.3224	5	island	.	.	.	.	.	.
scaffold_184	383101	383200	chrUn_1	0	0	83.235	1	shelf	.	.	.	.	.	.
scaffold_184	1161301	1161400	chrUn_1	0	0	85.1284	1	open sea	-2478	GSONMT00069891001	TMEM5_DANRE	Transmembrane protein 5	0	.
scaffold_1842	6301	6400	chrUn	0	0	41.9979	5	open sea	.	.	.	.	.	.
scaffold_1844	91001	91100	chrUn	0	0	19.7373	4	island	.	.	.	.	.	.
scaffold_1844	91401	91500	chrUn	0	0	19.6226	2	shore	.	.	.	.	.	ID=RM959841;Name=RM959841;Note=Motif:Gypsy-10_GA-I-int
scaffold_18478	501	600	chrUn	0	0	36.1909	2	open sea	.	.	.	.	.	.
scaffold_1857	158501	158600	chrUn	0	0	33.3355	3	open sea	.	.	.	.	.	.
scaffold_18573	5101	5200	chrUn	0	0	37.0791	7	open sea	0	GSONMT00031593001	CLD20_HUMAN	Claudin-20	1e-52	.
scaffold_186	22001	22100	chrUn_17	0	0	23.9155	3	shore	0	GSONMT00069983001	FRS3_MOUSE	Fibroblast growth factor receptor substrate 3	2e-126	.
scaffold_186	405401	405500	chrUn_17	0	0	20.2001	2	shore	0	GSONMT00070013001	SYNPR_MOUSE	Synaptoporin	5e-73	.
scaffold_18642	4201	4300	chrUn	0	0	95.0461	3	open sea	.	.	.	.	.	.
scaffold_18660	7201	7300	chrUn	0	0	33.3805	5	shore	.	.	.	.	.	ID=RM966394;Name=RM966394;Note=Motif:REX1-1_AFC
scaffold_1869	52101	52200	chrUn	0	0	23.231	2	open sea	.	.	.	.	.	.
scaffold_187	532901	533000	chrUn_19	0	0	26.6764	1	open sea	-4716	GSONMT00070073001	.	.	.	.
scaffold_187	533001	533100	chrUn_19	0	0	31.2164	4	open sea	-4616	GSONMT00070073001	.	.	.	.
scaffold_187	615001	615100	chrUn_19	0	0	33.5364	10	island	.	.	.	.	.	.
scaffold_187	615101	615200	chrUn_19	0	0	32.466	7	island	.	.	.	.	.	.
scaffold_187	853501	853600	chrUn_19	0	0	20.376	4	island	0	GSONMT00070077001	FAT1_HUMAN	Protocadherin Fat 1	0	.
scaffold_187	1044401	1044500	chrUn_19	0	0	19.7161	3	open sea	.	.	.	.	.	.
scaffold_187	1087101	1087200	chrUn_19	0	0	32.1088	9	shore	.	.	.	.	.	.
scaffold_187	1087201	1087300	chrUn_19	0	0	20.5603	8	shore	.	.	.	.	.	.
scaffold_187	1244201	1244300	chrUn_19	0	0	19.5944	4	open sea	.	.	.	.	.	.
scaffold_187	1263801	1263900	chrUn_19	0	0	24.4717	4	shelf	.	.	.	.	.	.
scaffold_187	1304201	1304300	chrUn_19	0	0	19.7041	4	shore	0	GSONMT00070089001	SRBS2_MOUSE	Sorbin and SH3 domain-containing protein 2	5e-177	.
scaffold_1870	149301	149400	chrUn	0	0	23.7962	3	open sea	0	GSONMT00038410001	RIMS1_MOUSE	Regulating synaptic membrane exocytosis protein 1	3e-99	.
scaffold_1870	158201	158300	chrUn	0	0	22.384	7	shore	935	GSONMT00038410001	RIMS1_MOUSE	Regulating synaptic membrane exocytosis protein 1	3e-99	.
scaffold_1873	77201	77300	chrUn_18	0	0	30.2437	5	open sea	-7738	GSONMT00034595001	NETO1_HUMAN	Neuropilin and tolloid-like protein 1	7e-77	.
scaffold_1873	77301	77400	chrUn_18	0	0	24.5942	3	open sea	-7838	GSONMT00034595001	NETO1_HUMAN	Neuropilin and tolloid-like protein 1	7e-77	.
scaffold_18734	101	200	chrUn	0	0	19.5688	7	open sea	.	.	.	.	.	.
scaffold_1874	4901	5000	chrUn	0	0	21.2445	3	open sea	.	.	.	.	.	.
scaffold_1874	68701	68800	chrUn	0	0	24.5709	2	shore	-3379	GSONMT00052686001	CH034_HUMAN	Uncharacterized protein C8orf34	4e-42	.
scaffold_1875	27201	27300	chrUn	0	0	95.0212	3	shore	-415	GSONMT00030476001	ZN330_HUMAN	Zinc finger protein 330	3e-137	.
scaffold_1879	61501	61600	chrUn	0	0	24.1035	3	shelf	0	GSONMT00048638001	DHX30_CHICK	Putative ATP-dependent RNA helicase DHX30	0	.
scaffold_188	74801	74900	chr_23	0	0	19.5883	3	shore	0	GSONMT00070092001	CSMD1_HUMAN	CUB and sushi domain-containing protein 1	0	.
scaffold_188	769401	769500	chr_23	0	0	22.4974	4	shore	-3069	GSONMT00070124001	.	.	.	.
scaffold_188	770901	771000	chr_23	0	0	24.4187	8	island	-1569	GSONMT00070124001	.	.	.	.
scaffold_188	775401	775500	chr_23	0	0	20.3057	6	island	1645	GSONMT00070124001	.	.	.	.
scaffold_1881	139301	139400	chrUn	0	0	22.0374	4	shore	-5699	GSONMT00012830001	ST2B1_HUMAN	Sulfotransferase family cytosolic 2B member 1	2e-60	.
scaffold_1886	1101	1200	chrUn	0	0	21.785	2	open sea	.	.	.	.	.	ID=RM972301;Name=RM972301;Note=Motif:TZF28C
scaffold_189	41501	41600	chrUn_23	0	0	33.4712	4	island	.	.	.	.	.	.
scaffold_189	456901	457000	chrUn_23	0	0	32.3876	7	open sea	0	GSONMT00070162001	T150A_HUMAN	Transmembrane protein 150A	2e-12	.
scaffold_18914	1901	2000	chrUn	0	0	19.9241	5	open sea	.	.	.	.	.	.
scaffold_18922	101	200	chrUn	0	0	23.7926	3	shore	5428	GSONMT00024175001	ZN436_HUMAN	Zinc finger protein 436	7e-92	.
scaffold_18954	7801	7900	chrUn	0	0	31.0543	3	open sea	.	.	.	.	.	.
scaffold_18985	6601	6700	chrUn	0	0	19.9105	4	shore	.	.	.	.	.	ID=RM975829;Name=RM975829;Note=Motif:Gypsy-12_GA-I-int
scaffold_190	370901	371000	chrUn_21	0	0	27.3104	3	shore	.	.	.	.	.	ID=RM978620;Name=RM978620;Note=Motif:CR1-40_DR
scaffold_1902	20301	20400	chrUn	0	0	23.4562	5	shelf	4907	GSONMT00033192001	RD23A_HUMAN	UV excision repair protein RAD23 homolog A	6e-113	.
scaffold_1905	65601	65700	chrUn_4	0	0	91.9927	4	shore	0	GSONMT00028065001	TM125_MOUSE	Transmembrane protein 125	5e-14	.
scaffold_1905	65701	65800	chrUn_4	0	0	89.0048	4	shore	0	GSONMT00028065001	TM125_MOUSE	Transmembrane protein 125	5e-14	.
scaffold_1906	123101	123200	chrUn_23	0	0	23.6999	5	shore	0	GSONMT00027328001	HS3SA_HUMAN	Heparan sulfate glucosamine 3-O-sulfotransferase 3A1	1e-120	.
scaffold_1912	114501	114600	chrUn	0	0	20.6635	2	open sea	.	.	.	.	.	.
scaffold_19160	6701	6800	chrUn	0	0	42.9007	2	open sea	0	GSONMT00018829001	.	.	.	.
scaffold_19160	6801	6900	chrUn	0	0	56.8186	0	open sea	0	GSONMT00018829001	.	.	.	.
scaffold_19160	7701	7800	chrUn	0	0	24.4197	4	open sea	0	GSONMT00018829001	.	.	.	.
scaffold_19160	7801	7900	chrUn	0	0	23.0889	4	open sea	0	GSONMT00018829001	.	.	.	.
scaffold_19174	6601	6700	chrUn	1.06e-08	5.76e-10	-20.0177	9	island	.	.	.	.	.	.
scaffold_192	363801	363900	chrUn_13	0	0	21.6478	3	open sea	.	.	.	.	.	.
scaffold_192	440901	441000	chrUn_13	0	0	29.4487	2	open sea	0	GSONMT00070391001	ELFN1_HUMAN	Protein ELFN1	0	.
scaffold_192	1037501	1037600	chrUn_13	0	0	21.644	8	shelf	.	.	.	.	.	.
scaffold_192	1129501	1129600	chrUn_13	0	0	35.354	5	island	0	GSONMT00070424001	.	.	.	.
scaffold_19203	3001	3100	chrUn	0	0	25.708	3	shore	.	.	.	.	.	.
scaffold_1923	99201	99300	chrUn	0	0	20.5885	3	shore	0	GSONMT00026756001	.	.	.	.
scaffold_19274	7801	7900	chrUn	0	0	29.8491	3	open sea	63	GSONMT00016730001	RCAN2_PONAB	Calcipressin-2	4e-29	.
scaffold_19291	8201	8300	chrUn	0	0	20.3212	2	open sea	.	.	.	.	.	.
scaffold_193	878101	878200	chrUn_17	0	0	89.606	7	shelf	0	GSONMT00070454001	DDX5_HUMAN	Probable ATP-dependent RNA helicase DDX5	0	.
scaffold_193	1160001	1160100	chrUn_17	0	0	38.9794	3	shore	-4362	GSONMT00070470001	RHES_RAT	GTP-binding protein Rhes	4e-39	.
scaffold_193	1282501	1282600	chrUn_17	0	0	29.1112	3	shelf	-1022	GSONMT00070476001	TRI35_HUMAN	Tripartite motif-containing protein 35	7e-41	.
scaffold_1931	101701	101800	chrUn_9	0	0	-89.8148	7	island	0	GSONMT00019901001	ACINU_HUMAN	Apoptotic chromatin condensation inducer in the nucleus	2e-99	.
scaffold_19325	7701	7800	chrUn	0	0	39.7263	2	shore	.	.	.	.	.	.
scaffold_1936	122601	122700	chrUn	0	0	20.6683	4	shore	.	.	.	.	.	.
scaffold_1936	128501	128600	chrUn	0	0	21.3563	2	shelf	.	.	.	.	.	ID=RM989242;Name=RM989242;Note=Motif:Copia-7-I_DR-int
scaffold_1939	5501	5600	chrUn	0	0	70.4858	4	open sea	0	GSONMT00020298001	SP16H_HUMAN	FACT complex subunit SPT16	0	.
scaffold_1939	5601	5700	chrUn	0	0	68.4463	5	open sea	0	GSONMT00020298001	SP16H_HUMAN	FACT complex subunit SPT16	0	.
scaffold_1943	25801	25900	chrUn_17	0	0	19.8019	2	open sea	.	.	.	.	.	.
scaffold_195	392901	393000	chrUn_5	0	0	23.8033	2	open sea	2411	GSONMT00070572001	GP144_HUMAN	Probable G-protein coupled receptor 144	2e-71	.
scaffold_195	614601	614700	chrUn_5	0	0	40.5523	2	open sea	.	.	.	.	.	.
scaffold_195	751101	751200	chrUn_5	0	0	20.3834	4	open sea	.	.	.	.	.	.
scaffold_195	821301	821400	chrUn_5	0	0	28.3556	2	open sea	.	.	.	.	.	.
scaffold_1955	76701	76800	chrUn_5	0	0	20.1621	3	shelf	8287	GSONMT00016383001	.	.	.	.
scaffold_1956	8401	8500	chrUn_Sex	0	0	21.3232	2	open sea	0	GSONMT00002960001	.	.	.	.
scaffold_1956	125801	125900	chrUn_Sex	0	0	27.9979	4	open sea	3526	GSONMT00002963001	LRRT4_MOUSE	Leucine-rich repeat transmembrane neuronal protein 4	0	.
scaffold_1959	54401	54500	chrUn	0	0	-79.6399	2	open sea	0	GSONMT00011470001	HXA3A_TAKRU	Homeobox protein Hox-A3a	7e-174	.
scaffold_196	432801	432900	chrUn_10	0	0	39.5766	9	open sea	0	GSONMT00070606001	.	.	.	.
scaffold_196	432901	433000	chrUn_10	0	0	28.8923	6	open sea	0	GSONMT00070606001	.	.	.	.
scaffold_196	506801	506900	chrUn_10	0	0	24.3178	3	open sea	-2999	GSONMT00070610001	DHX15_PONAB	Putative pre-mRNA-splicing factor ATP-dependent RNA helicase DHX15	0	.
scaffold_196	565101	565200	chrUn_10	0	0	-35.7295	12	shore	0	GSONMT00070613001	STOX2_HUMAN	Storkhead-box protein 2	0	.
scaffold_196	736201	736300	chrUn_10	0	0	43.8094	5	open sea	0	GSONMT00070618001	.	.	.	.
scaffold_196	736301	736400	chrUn_10	0	0	25.639	4	open sea	0	GSONMT00070618001	.	.	.	.
scaffold_196	970301	970400	chrUn_10	0	0	70.7819	3	open sea	.	.	.	.	.	.
scaffold_196	988501	988600	chrUn_10	0	0	21.4322	3	open sea	0	GSONMT00070631001	GCYA3_RAT	Guanylate cyclase soluble subunit alpha-3	1e-53	.
scaffold_1960	98701	98800	chrUn	0	0	81.5349	4	open sea	0	GSONMT00034704001	KCNH3_MOUSE	Potassium voltage-gated channel subfamily H member 3	1e-167	.
scaffold_1961	48001	48100	chrUn	0	0	20.5974	3	open sea	0	GSONMT00049372001	MYL6_PIG	Myosin light polypeptide 6	2e-92	.
scaffold_19613	5501	5600	chrUn	0	0	20.2243	5	shore	.	.	.	.	.	ID=RM996913;Name=RM996913;Note=Motif:Gypsy-12_GA-I-int
scaffold_19629	3501	3600	chrUn	0	0	22.0062	2	shelf	.	.	.	.	.	.
scaffold_19645	3301	3400	chrUn	0	0	21.0876	4	open sea	.	.	.	.	.	.
scaffold_1967	30901	31000	chrUn	0	0	45.897	2	shore	.	.	.	.	.	.
scaffold_197	141401	141500	chrUn_7	0	0	25.9998	7	island	0	GSONMT00070649001	SCN8A_MOUSE	Sodium channel protein type 8 subunit alpha	0	.
scaffold_1971	15501	15600	chrUn	0	0	23.069	3	open sea	-1104	GSONMT00010311001	TMC5_HUMAN	Transmembrane channel-like protein 5	1e-75	.
scaffold_19741	2101	2200	chrUn	0	0	19.5061	3	shore	.	.	.	.	.	ID=RM1000478;Name=RM1000478;Note=Motif:Gypsy-10_GA-I-int
scaffold_19768	1901	2000	chrUn	0	0	-74.6738	9	island	.	.	.	.	.	.
scaffold_198	705501	705600	chrUn_8	0	0	22.9669	2	open sea	.	.	.	.	.	.
scaffold_198	786801	786900	chrUn_8	0	0	21.0495	3	shore	.	.	.	.	.	.
scaffold_19821	7901	8000	chrUn	0	0	21.5887	3	shelf	-607	GSONMT00006019001	.	.	.	.
scaffold_19833	5701	5800	chrUn	0	0	34.4144	4	open sea	.	.	.	.	.	.
scaffold_19870	2001	2100	chrUn_12	0	0	22.5396	4	open sea	.	.	.	.	.	.
scaffold_1994	13301	13400	chrUn	0	0	33.2935	5	shelf	-1876	GSONMT00030905001	IFFO1_MOUSE	Intermediate filament family orphan 1	6e-69	.
scaffold_19975	5601	5700	chrUn	0	0	24.7431	2	shore	.	.	.	.	.	ID=RM1006540;Name=RM1006540;Note=Motif:TZF28C
scaffold_1998	100801	100900	chrUn	0	0	40.7621	2	open sea	.	.	.	.	.	.
scaffold_2	86601	86700	chr_15	0	0	44.1388	8	island	.	.	.	.	.	.
scaffold_2	1250401	1250500	chr_15	0	0	29.6716	7	open sea	.	.	.	.	.	.
scaffold_2	1347701	1347800	chr_15	0	0	26.567	6	open sea	.	.	.	.	.	.
scaffold_2	1507301	1507400	chr_15	0	0	19.5904	1	open sea	.	.	.	.	.	ID=RM1008283;Name=RM1008283;Note=Motif:Gypsy-168-I_DR-int
scaffold_2	1809301	1809400	chr_15	0	0	20.7894	1	open sea	.	.	.	.	.	.
scaffold_2	3186201	3186300	chr_15	0	0	22.8658	2	open sea	0	GSONMT00070892001	SKT_HUMAN	Sickle tail protein homolog	6e-154	.
scaffold_2	3370101	3370200	chr_15	0	0	21.4323	1	shelf	.	.	.	.	.	.
scaffold_2	3683101	3683200	chr_15	0	0	24.2047	1	open sea	.	.	.	.	.	.
scaffold_20	406501	406600	chrUn_11	0	0	19.6132	3	open sea	.	.	.	.	.	.
scaffold_20	978401	978500	chrUn_11	0	0	91.2645	5	shore	.	.	.	.	.	.
scaffold_20	978501	978600	chrUn_11	0	0	89.1284	4	shore	.	.	.	.	.	.
scaffold_20	982001	982100	chrUn_11	0	0	20.1256	6	shelf	.	.	.	.	.	.
scaffold_20	1524901	1525000	chrUn_11	0	0	19.6574	2	shelf	-8810	GSONMT00070996001	S40A1_DANRE	Solute carrier family 40 member 1	0	.
scaffold_20	1636701	1636800	chrUn_11	0	0	23.4585	7	island	-1533	GSONMT00070999001	WDR75_DANRE	WD repeat-containing protein 75	0	.
scaffold_20	2229001	2229100	chrUn_11	0	0	23.6431	3	shore	.	.	.	.	.	ID=RM1012271;Name=RM1012271;Note=Motif:Ronin1_I-int
scaffold_20	2327101	2327200	chrUn_11	0	0	20.1763	5	island	-3227	GSONMT00071029001	UMPS_HUMAN	Uridine 5'-monophosphate synthase	0	.
scaffold_2001	125901	126000	chrUn_14	0	0	34.5398	4	open sea	.	.	.	.	.	.
scaffold_20012	4201	4300	chrUn	0	0	19.9164	3	shore	.	.	.	.	.	.
scaffold_2003	113201	113300	chrUn	0	0	28.615	5	island	-1345	GSONMT00013191001	FEZ2_HUMAN	Fasciculation and elongation protein zeta-2	7e-30	.
scaffold_2003	113301	113400	chrUn	0	0	23.1349	7	island	-1245	GSONMT00013191001	FEZ2_HUMAN	Fasciculation and elongation protein zeta-2	7e-30	.
scaffold_2004	40001	40100	chrUn	0	0	26.5348	6	open sea	.	.	.	.	.	ID=RM1014509;Name=RM1014509;Note=Motif:REX1-1_AFC
scaffold_2004	91801	91900	chrUn	0	0	60.0112	5	open sea	0	GSONMT00027347001	KCNH4_HUMAN	Potassium voltage-gated channel subfamily H member 4	0	.
scaffold_20076	5601	5700	chrUn	0	0	26.0025	5	shore	.	.	.	.	.	.
scaffold_2008	112701	112800	chrUn_5	0	0	-30.2652	8	island	0	GSONMT00003649001	FXC1A_DANRE	Forkhead box C1-A	0	.
scaffold_2008	113601	113700	chrUn_5	0	0	-39.8588	7	island	0	GSONMT00003649001	FXC1A_DANRE	Forkhead box C1-A	0	.
scaffold_2008	113701	113800	chrUn_5	0	0	-34.4291	7	island	0	GSONMT00003649001	FXC1A_DANRE	Forkhead box C1-A	0	.
scaffold_20087	1401	1500	chrUn	0	0	20.9643	9	island	.	.	.	.	.	.
scaffold_201	423501	423600	chrUn_6	0	0	19.7986	3	island	.	.	.	.	.	ID=RM1015862;Name=RM1015862;Note=Motif:Copia-7-I_DR-int
scaffold_201	479701	479800	chrUn_6	0	0	28.4891	2	open sea	.	.	.	.	.	ID=RM1015913;Name=RM1015913;Note=Motif:Gypsy105-I_Dr-int
scaffold_201	958801	958900	chrUn_6	0	0	20.2785	8	open sea	0	GSONMT00071108001	CILP1_HUMAN	Cartilage intermediate layer protein 1	0	.
scaffold_201	1205701	1205800	chrUn_6	0	0	23.7816	2	shore	0	GSONMT00071123001	ZO1_HUMAN	Tight junction protein ZO-1	0	.
scaffold_2010	46401	46500	chrUn	0	0	27.4704	8	island	.	.	.	.	.	.
scaffold_20108	1601	1700	chrUn	0	0	27.0414	1	open sea	0	GSONMT00054806001	MTAP2_HUMAN	Microtubule-associated protein 2	2e-17	.
scaffold_2013	64501	64600	chrUn	0	0	40.6525	6	open sea	0	GSONMT00014482001	MYT1L_MOUSE	Myelin transcription factor 1-like protein	2e-147	.
scaffold_20162	5701	5800	chrUn	0	0	24.5133	3	shelf	.	.	.	.	.	ID=RM1017580;Name=RM1017580;Note=Motif:CR1-40_DR
scaffold_202	307101	307200	chrUn_8	0	0	56.1733	3	shelf	.	.	.	.	.	.
scaffold_202	453201	453300	chrUn_8	0	0	24.568	5	shelf	.	.	.	.	.	.
scaffold_202	504601	504700	chrUn_8	0	0	85.0229	4	open sea	0	GSONMT00071136001	LAMA4_HUMAN	Laminin subunit alpha-4	0	.
scaffold_2020	73301	73400	chrUn	0	0	68.5017	4	open sea	.	.	.	.	.	.
scaffold_2021	54501	54600	chrUn_1	0	0	21.4669	5	shore	.	.	.	.	.	.
scaffold_2023	9401	9500	chrUn	0	0	20.3844	3	shore	.	.	.	.	.	.
scaffold_2025	26501	26600	chrUn_3	0	0	80.1935	4	open sea	0	GSONMT00007921001	CBL_MOUSE	E3 ubiquitin-protein ligase CBL	0	.
scaffold_203	661701	661800	chrUn_29	0	0	65.5977	4	open sea	0	GSONMT00071193001	CLIC4_PONAB	Chloride intracellular channel protein 4	7e-161	.
scaffold_2030	20301	20400	chrUn_5	0	0	28.0099	4	shelf	1861	GSONMT00063946001	NXNL2_MOUSE	Nucleoredoxin-like protein 2	1e-70	.
scaffold_2030	107901	108000	chrUn_5	0	0	21.2613	2	open sea	.	.	.	.	.	.
scaffold_2032	23701	23800	chrUn	0	0	22.3009	1	open sea	.	.	.	.	.	.
scaffold_20346	6901	7000	chrUn	0	0	33.9582	7	open sea	.	.	.	.	.	.
scaffold_20370	401	500	chrUn	0	0	34.8076	2	shore	.	.	.	.	.	.
scaffold_2038	129401	129500	chrUn	0	0	24.6141	5	open sea	.	.	.	.	.	.
scaffold_2039	129601	129700	chrUn	0	0	-82.3143	6	shore	.	.	.	.	.	.
scaffold_2040	51901	52000	chrUn_Sex	0	0	21.3059	2	shore	-4103	GSONMT00012774001	GRP2_MOUSE	RAS guanyl-releasing protein 2	0	.
scaffold_2040	113101	113200	chrUn_Sex	0	0	24.2586	8	open sea	0	GSONMT00012781001	NRG2_MOUSE	Pro-neuregulin-2, membrane-bound isoform	2e-73	.
scaffold_2043	60601	60700	chrUn	0	0	36.637	2	open sea	0	GSONMT00044188001	S17A9_HUMAN	Solute carrier family 17 member 9	6e-41	.
scaffold_2045	29601	29700	chrUn	0	0	20.0633	5	open sea	-7236	GSONMT00038594001	ACTC_RAT	Actin, alpha cardiac muscle 1	0	.
scaffold_2046	26501	26600	chrUn	0	0	22.7799	5	shore	.	.	.	.	.	.
scaffold_205	328301	328400	chrUn_13	0	0	32.2655	5	open sea	.	.	.	.	.	.
scaffold_205	328401	328500	chrUn_13	0	0	42.4135	5	open sea	.	.	.	.	.	.
scaffold_20501	501	600	chrUn	0	0	21.3028	5	island	.	.	.	.	.	.
scaffold_2059	2601	2700	chrUn	0	0	34.5029	6	shore	.	.	.	.	.	.
scaffold_2059	2701	2800	chrUn	0	0	23.6117	4	island	.	.	.	.	.	.
scaffold_206	182101	182200	chrUn_21	0	0	26.2681	3	open sea	6799	GSONMT00071276001	M10B1_DANRE	Putative helicase mov-10-B.1	0	.
scaffold_206	902401	902500	chrUn_21	0	0	35.5885	3	open sea	0	GSONMT00071312001	RASF5_RAT	Ras association domain-containing protein 5	3e-13	.
scaffold_206	1211101	1211200	chrUn_21	0	0	30.9716	10	island	0	GSONMT00071320001	PPR3A_RABIT	Protein phosphatase 1 regulatory subunit 3A	7e-55	.
scaffold_206	1250701	1250800	chrUn_21	0	0	22.8451	3	shore	.	.	.	.	.	.
scaffold_206	1250901	1251000	chrUn_21	0	0	29.9316	4	shore	.	.	.	.	.	.
scaffold_2060	73701	73800	chrUn	0	0	42.9971	1	shore	-1393	GSONMT00061309001	PLXA1_HUMAN	Plexin-A1	0	.
scaffold_2060	73801	73900	chrUn	0	0	47.3191	4	shore	-1493	GSONMT00061309001	PLXA1_HUMAN	Plexin-A1	0	.
scaffold_2063	8701	8800	chrUn	0	0	28.0362	5	shore	0	GSONMT00058962001	ZBTB3_HUMAN	Zinc finger and BTB domain-containing protein 3	8e-37	.
scaffold_2063	8801	8900	chrUn	0	0	29.3545	4	shore	0	GSONMT00058962001	ZBTB3_HUMAN	Zinc finger and BTB domain-containing protein 3	8e-37	.
scaffold_2064	90801	90900	chrUn_15	0	0	20.0604	2	open sea	0	GSONMT00008354001	OFCC1_CHICK	Orofacial cleft 1 candidate gene 1 protein homolog	3e-25	.
scaffold_2064	95401	95500	chrUn_15	0	0	22.3462	3	open sea	4067	GSONMT00008354001	OFCC1_CHICK	Orofacial cleft 1 candidate gene 1 protein homolog	3e-25	.
scaffold_2068	80501	80600	chrUn_16	0	0	22.8831	6	open sea	-6125	GSONMT00047524001	TB22B_HUMAN	TBC1 domain family member 22B	0	.
scaffold_207	488901	489000	chrUn_19	0	0	46.277	2	shore	-2885	GSONMT00071331001	FBX33_HUMAN	F-box only protein 33	0	.
scaffold_2071	301	400	chrUn	0	0	28.6067	4	open sea	-4496	GSONMT00058730001	BRN3_CHICK	Brain-specific homeobox/POU domain protein 3	1e-168	.
scaffold_2072	19001	19100	chrUn_5	0	0	23.1359	5	open sea	0	GSONMT00003899001	NUDC3_HUMAN	NudC domain-containing protein 3	2e-109	.
scaffold_2073	41501	41600	chrUn	0	0	-20.961	5	shelf	0	GSONMT00044086001	PRD16_MOUSE	PR domain zinc finger protein 16	3e-179	.
scaffold_20766	601	700	chrUn	0	0	26.4558	4	island	.	.	.	.	.	.
scaffold_2081	71001	71100	chrUn	0	0	44.7306	7	island	0	GSONMT00050264001	FA7_PANTR	Coagulation factor VII	2e-112	.
scaffold_2081	71101	71200	chrUn	0	0	27.8935	4	shore	0	GSONMT00050264001	FA7_PANTR	Coagulation factor VII	2e-112	.
scaffold_20853	4801	4900	chrUn	0	0	20.8113	2	shore	.	.	.	.	.	ID=RM1036185;Name=RM1036185;Note=Motif:Gypsy-10_GA-I-int
scaffold_2086	85401	85500	chrUn	0	0	20.204	3	shore	.	.	.	.	.	.
scaffold_20889	201	300	chrUn	0	0	23.911	3	open sea	889	GSONMT00001863001	ZNF32_HUMAN	Zinc finger protein 32	2e-19	.
scaffold_20892	6501	6600	chrUn	0	0	24.561	4	open sea	448	GSONMT00007877001	IDHP_MOUSE	Isocitrate dehydrogenase	5e-56	.
scaffold_20896	4701	4800	chrUn	0	0	22.5511	2	open sea	.	.	.	.	.	.
scaffold_209	216301	216400	chrUn_12	0	0	36.6852	1	open sea	.	.	.	.	.	.
scaffold_209	216401	216500	chrUn_12	0	0	43.3197	5	open sea	.	.	.	.	.	.
scaffold_209	449601	449700	chrUn_12	0	0	23.1708	2	open sea	.	.	.	.	.	.
scaffold_209	552601	552700	chrUn_12	0	0	87.4154	5	open sea	.	.	.	.	.	.
scaffold_2093	10101	10200	chrUn_12	0	0	28.5651	1	shore	.	.	.	.	.	ID=RM1038455;Name=RM1038455;Note=Motif:Gypsy-10_GA-I-int
scaffold_20941	6101	6200	chrUn	0	0	23.5071	2	open sea	.	.	.	.	.	.
scaffold_20978	1201	1300	chrUn	0	0	20.0246	6	open sea	.	.	.	.	.	.
scaffold_20978	2801	2900	chrUn	0	0	25.2546	2	open sea	.	.	.	.	.	.
scaffold_21	1213801	1213900	chrUn_14	0	0	60.8666	2	open sea	.	.	.	.	.	.
scaffold_21	1420301	1420400	chrUn_14	0	0	20.2299	7	open sea	.	.	.	.	.	.
scaffold_21	1458501	1458600	chrUn_14	0	0	36.9312	7	shelf	.	.	.	.	.	.
scaffold_21	2626601	2626700	chrUn_14	0	0	37.3174	8	open sea	0	GSONMT00071617001	FLOT1_CARAU	Flotillin-1	0	.
scaffold_210	14701	14800	chrUn_6	0	0	22.0291	4	shore	.	.	.	.	.	ID=RM1041377;Name=RM1041377;Note=Motif:TZF28B
scaffold_210	19601	19700	chrUn_6	0	0	40.7218	4	shore	.	.	.	.	.	ID=RM1041381;Name=RM1041381;Note=Motif:Gypsy-10_GA-I-int
scaffold_210	76901	77000	chrUn_6	0	0	19.711	7	island	.	.	.	.	.	ID=RM1041411;Name=RM1041411;Note=Motif:Gypsy-10_GA-I-int
scaffold_210	408101	408200	chrUn_6	0	0	37.9474	7	open sea	0	GSONMT00071644001	SCRB2_RAT	Lysosome membrane protein 2	4e-49	.
scaffold_21009	5601	5700	chrUn	0	0	23.0505	7	shore	.	.	.	.	.	.
scaffold_2102	74701	74800	chrUn	0	0	24.775	3	shore	.	.	.	.	.	.
scaffold_2106	66101	66200	chrUn	0	0	21.9534	4	shore	.	.	.	.	.	.
scaffold_21125	301	400	chrUn	0	0	94.3815	2	open sea	.	.	.	.	.	.
scaffold_2115	28901	29000	chrUn	0	0	22.9518	3	open sea	.	.	.	.	.	.
scaffold_2115	89101	89200	chrUn	0	0	27.093	3	open sea	.	.	.	.	.	.
scaffold_21173	3801	3900	chrUn	0	0	20.7508	5	island	.	.	.	.	.	ID=RM1046146;Name=RM1046146;Note=Motif:Gypsy-47_GA-I-int
scaffold_212	530101	530200	chrUn_20	0	0	29.0319	3	open sea	0	GSONMT00071779001	MLIP_HUMAN	Muscular LMNA-interacting protein	9e-24	.
scaffold_212	1244301	1244400	chrUn_20	0	0	25.5438	2	open sea	4232	GSONMT00071807001	CSMD1_HUMAN	CUB and sushi domain-containing protein 1	0	.
scaffold_2125	42101	42200	chrUn_16	0	0	20.1665	3	shore	0	GSONMT00061041001	PKHG5_RAT	Pleckstrin homology domain-containing family G member 5	8e-89	.
scaffold_2128	120901	121000	chrUn_11	0	0	47.992	5	open sea	.	.	.	.	.	.
scaffold_213	312001	312100	chrUn_7	0	0	91.3345	2	open sea	0	GSONMT00071816001	.	.	.	.
scaffold_213	621401	621500	chrUn_7	0	0	23.1551	3	open sea	.	.	.	.	.	.
scaffold_213	1003501	1003600	chrUn_7	0	0	36.944	7	shore	0	GSONMT00071834001	FRM4B_HUMAN	FERM domain-containing protein 4B	0	.
scaffold_2130	118701	118800	chrUn	0	0	32.1755	2	shore	.	.	.	.	.	.
scaffold_2131	42301	42400	chrUn	0	0	20.2789	3	open sea	.	.	.	.	.	.
scaffold_21336	1101	1200	chrUn	0	0	20.1832	3	open sea	.	.	.	.	.	ID=RM1050739;Name=RM1050739;Note=Motif:CR1-40_DR
scaffold_2136	96701	96800	chrUn	0	0	20.957	2	open sea	.	.	.	.	.	.
scaffold_21361	1301	1400	chrUn_6	0	0	26.937	1	open sea	.	.	.	.	.	.
scaffold_21396	2201	2300	chrUn	0	0	20.5484	6	shelf	0	GSONMT00052365001	SRPK1_MOUSE	SRSF protein kinase 1	2e-67	.
scaffold_214	1081001	1081100	chrUn_26	0	0	22.0575	4	open sea	0	GSONMT00071887001	CPNE7_MOUSE	Copine-7	0	.
scaffold_21408	601	700	chrUn	0	0	25.1217	4	open sea	.	.	.	.	.	.
scaffold_2146	40801	40900	chrUn	0	0	20.0564	6	island	5341	GSONMT00014849001	AKR1_ASPFU	Palmitoyltransferase akr1	4e-33	.
scaffold_21461	1901	2000	chrUn	0	0	34.0031	3	open sea	.	.	.	.	.	.
scaffold_21493	1501	1600	chrUn	0	0	28.6472	8	island	2496	GSONMT00023380001	CPNE9_RAT	Copine-9	6e-41	.
scaffold_215	853101	853200	chrUn_3	0	0	30.4161	4	shore	.	.	.	.	.	.
scaffold_215	1038301	1038400	chrUn_3	0	0	57.0195	2	open sea	.	.	.	.	.	.
scaffold_21521	101	200	chrUn	0	0	20.6166	2	open sea	.	.	.	.	.	ID=RM1055690;Name=RM1055690;Note=Motif:CR1-24_DR
scaffold_2154	901	1000	chrUn	0	0	20.1772	5	open sea	.	.	.	.	.	.
scaffold_2154	1001	1100	chrUn	0	0	28.8924	2	open sea	.	.	.	.	.	.
scaffold_2154	20101	20200	chrUn	0	0	19.7808	2	shore	.	.	.	.	.	.
scaffold_2158	93501	93600	chrUn	0	0	20.2499	4	open sea	0	GSONMT00025640001	BI2L2_DANRE	Brain-specific angiogenesis inhibitor 1-associated protein 2-like protein 2	3e-132	.
scaffold_216	750401	750500	chrUn_3	0	0	39.7321	2	shelf	0	GSONMT00071979001	VWDE_HUMAN	von Willebrand factor D and EGF domain-containing protein	0	.
scaffold_2165	111301	111400	chrUn_19	0	0	20.2688	3	shelf	-3471	GSONMT00019964001	PKHH1_DANRE	Pleckstrin homology domain-containing family H member 1	0	.
scaffold_2166	118101	118200	chrUn	0	0	31.9938	1	open sea	-1153	GSONMT00033748001	TCEA1_HUMAN	Transcription elongation factor A protein 1	4e-39	.
scaffold_2169	100801	100900	chrUn_23	0	0	21.7231	6	shore	.	.	.	.	.	.
scaffold_217	682401	682500	chrUn	0	0	20.7136	6	shore	-2108	GSONMT00072037001	YRD6_CAEEL	Uncharacterized protein K02A2.6	1e-19	.
scaffold_217	1207201	1207300	chrUn	0	0	26.4967	6	island	.	.	.	.	.	.
scaffold_217	1207301	1207400	chrUn	0	0	24.4241	3	island	-9947	GSONMT00072072001	MUC5B_HUMAN	Mucin-5B	0	.
scaffold_21711	201	300	chrUn	0	0	26.6214	4	open sea	.	.	.	.	.	.
scaffold_2173	5801	5900	chrUn	0	0	22.3548	6	open sea	7124	GSONMT00061074001	TAAR6_RAT	Trace amine-associated receptor 6	3e-55	.
scaffold_2173	20701	20800	chrUn	0	0	23.7912	7	shore	-6728	GSONMT00061074001	TAAR6_RAT	Trace amine-associated receptor 6	3e-55	.
scaffold_2173	20801	20900	chrUn	0	0	28.982	5	shore	-6828	GSONMT00061074001	TAAR6_RAT	Trace amine-associated receptor 6	3e-55	.
scaffold_21742	3001	3100	chrUn	0	0	19.8915	2	open sea	.	.	.	.	.	.
scaffold_21748	7201	7300	chrUn_18	0	0	28.2283	2	open sea	.	.	.	.	.	.
scaffold_2176	14701	14800	chrUn	0	0	22.4966	4	shore	0	GSONMT00003362001	NAV1_MOUSE	Neuron navigator 1	1e-64	.
scaffold_218	258401	258500	chr_18	0	0	27.5464	6	shore	0	GSONMT00072085001	EXT1C_DANRE	Exostosin-1c	2e-166	.
scaffold_218	334401	334500	chr_18	0	0	23.035	3	open sea	0	GSONMT00072087001	SDC2B_XENLA	Syndecan-2-B	7e-28	.
scaffold_218	866701	866800	chr_18	0	0	21.4811	2	open sea	0	GSONMT00072097001	EXT1B_DANRE	Exostosin-1b	9e-177	.
scaffold_2185	2601	2700	chrUn_29	0	0	24.8364	3	shore	.	.	.	.	.	.
scaffold_21885	1801	1900	chrUn	0	0	21.4209	2	open sea	3802	GSONMT00045794001	.	.	.	.
scaffold_2189	45801	45900	chrUn_4	0	0	32.8781	2	open sea	.	.	.	.	.	.
scaffold_219	646601	646700	chrUn_4	0	0	28.9986	1	shelf	.	.	.	.	.	.
scaffold_219	991101	991200	chrUn_4	1.89e-15	1.22e-16	27.8514	2	shore	.	.	.	.	.	.
scaffold_21914	1501	1600	chrUn	0	0	29.9519	6	open sea	.	.	.	.	.	ID=RM1065637;Name=RM1065637;Note=Motif:Gypsy-11_GA-I-int
scaffold_21987	4701	4800	chrUn	0	0	25.2573	4	island	.	.	.	.	.	ID=RM1066970;Name=RM1066970;Note=Motif:TC1DR3
scaffold_21987	4801	4900	chrUn	0	0	37.9772	3	island	.	.	.	.	.	ID=RM1066970;Name=RM1066970;Note=Motif:TC1DR3
scaffold_22	80701	80800	chrUn_4	0	0	21.126	3	open sea	0	GSONMT00072140001	TDR15_HUMAN	Tudor domain-containing protein 15	0	.
scaffold_22	152901	153000	chrUn_4	0	0	45.3502	4	open sea	.	.	.	.	.	.
scaffold_22	237601	237700	chrUn_4	0	0	19.6166	3	open sea	-5704	GSONMT00072149001	GOPC_MOUSE	Golgi-associated PDZ and coiled-coil motif-containing protein	0	.
scaffold_22	428101	428200	chrUn_4	0	0	56.1086	5	open sea	0	GSONMT00072161001	CE85L_HUMAN	Centrosomal protein of 85 kDa-like	1e-36	.
scaffold_22	453501	453600	chrUn_4	0	0	42.2084	3	open sea	0	GSONMT00072161001	CE85L_HUMAN	Centrosomal protein of 85 kDa-like	1e-36	.
scaffold_22	568401	568500	chrUn_4	0	0	20.6473	5	island	0	GSONMT00072163001	F184A_HUMAN	Protein FAM184A	0	.
scaffold_22	1553901	1554000	chrUn_4	0	0	26.1611	6	open sea	-9733	GSONMT00072197001	HDDC2_DANRE	HD domain-containing protein 2	6e-110	.
scaffold_22	1554001	1554100	chrUn_4	0	0	38.267	3	open sea	-9833	GSONMT00072197001	HDDC2_DANRE	HD domain-containing protein 2	6e-110	.
scaffold_22	1554101	1554200	chrUn_4	0	0	22.7415	7	open sea	-9933	GSONMT00072197001	HDDC2_DANRE	HD domain-containing protein 2	6e-110	.
scaffold_220	660601	660700	chrUn_14	0	0	21.1662	5	shore	0	GSONMT00072285001	PHR4B_DANRE	Phosphatase and actin regulator 4B	4e-33	.
scaffold_220	1118501	1118600	chrUn_14	0	0	30.1607	2	open sea	4985	GSONMT00072294001	PTPRU_DANRE	Receptor-type tyrosine-protein phosphatase U	0	.
scaffold_2200	86701	86800	chrUn	0	0	-22.3778	5	island	0	GSONMT00052454001	SP8_DANRE	Transcription factor Sp8	0	.
scaffold_2200	86801	86900	chrUn	0	0	-34.6205	5	shore	0	GSONMT00052454001	SP8_DANRE	Transcription factor Sp8	0	.
scaffold_2200	113601	113700	chrUn	0	0	32.5915	5	shore	.	.	.	.	.	.
scaffold_2200	113701	113800	chrUn	0	0	48.1937	6	island	.	.	.	.	.	.
scaffold_22001	1801	1900	chrUn	0	0	39.2461	5	shore	.	.	.	.	.	.
scaffold_2205	94301	94400	chrUn	0	0	23.9345	3	shore	.	.	.	.	.	.
scaffold_22067	5801	5900	chrUn_4	0	0	22.8824	2	open sea	-4930	GSONMT00040842001	IQCH_DANRE	IQ motif-containing protein H	2e-18	.
scaffold_221	1122801	1122900	chr_2	0	0	24.6467	5	open sea	-3502	GSONMT00072340001	DDR2_HUMAN	Discoidin domain-containing receptor 2	1e-16	.
scaffold_2214	68001	68100	chrUn_12	0	0	36.5724	2	open sea	1588	GSONMT00006456001	NOGG3_DANRE	Noggin-3	2e-111	.
scaffold_22142	6401	6500	chrUn	0	0	32.5591	3	open sea	.	.	.	.	.	.
scaffold_222	319801	319900	chrUn	0	0	22.4843	4	shore	.	.	.	.	.	.
scaffold_222	415701	415800	chrUn	0	0	20.4645	1	shelf	.	.	.	.	.	.
scaffold_222	438601	438700	chrUn	0	0	29.6189	2	open sea	.	.	.	.	.	.
scaffold_222	544901	545000	chrUn	0	0	25.3429	6	open sea	9237	GSONMT00072356001	OSR1_DANRE	Protein odd-skipped-related 1	9e-146	.
scaffold_2224	2501	2600	chrUn_24	0	0	29.1871	4	open sea	0	GSONMT00061084001	.	.	.	.
scaffold_2224	6501	6600	chrUn_24	0	0	21.4251	3	open sea	-2093	GSONMT00061084001	.	.	.	.
scaffold_2228	53901	54000	chrUn_18	0	0	22.1572	6	island	.	.	.	.	.	.
scaffold_2228	54001	54100	chrUn_18	0	0	22.3223	11	island	.	.	.	.	.	.
scaffold_223	59601	59700	chrUn_5	0	0	72.6837	6	shelf	.	.	.	.	.	.
scaffold_223	110701	110800	chrUn_5	0	0	35.9636	9	island	.	.	.	.	.	.
scaffold_223	914701	914800	chrUn_5	0	0	33.1466	2	open sea	.	.	.	.	.	.
scaffold_223	1066001	1066100	chrUn_5	0	0	87.1712	3	open sea	.	.	.	.	.	.
scaffold_223	1183701	1183800	chrUn_5	0	0	96.139	5	shore	0	GSONMT00072432001	RBG1L_PONAB	Rab GTPase-activating protein 1-like	3e-62	.
scaffold_223	1183801	1183900	chrUn_5	0	0	96.3905	5	island	0	GSONMT00072432001	RBG1L_PONAB	Rab GTPase-activating protein 1-like	3e-62	.
scaffold_223	1183901	1184000	chrUn_5	0	0	90.6689	7	island	0	GSONMT00072432001	RBG1L_PONAB	Rab GTPase-activating protein 1-like	3e-62	.
scaffold_22308	1601	1700	chrUn	0	0	20.5949	4	shore	.	.	.	.	.	.
scaffold_2231	3801	3900	chrUn_14	0	0	36.7027	6	open sea	.	.	.	.	.	.
scaffold_2232	92301	92400	chrUn_29	0	0	24.0032	9	open sea	0	GSONMT00060827001	NCKX4_HUMAN	Sodium/potassium/calcium exchanger 4	9e-93	.
scaffold_2233	26101	26200	chrUn	0	0	39.7752	2	shelf	-8744	GSONMT00054169001	ADRB2_ONCMY	Beta-2 adrenergic receptor	0	.
scaffold_2233	91901	92000	chrUn	0	0	20.3543	4	open sea	.	.	.	.	.	.
scaffold_22355	4001	4100	chrUn	0	0	31.3398	3	open sea	.	.	.	.	.	.
scaffold_22355	4101	4200	chrUn	0	0	55.5897	2	open sea	.	.	.	.	.	ID=RM1078455;Name=RM1078455;Note=Motif:Polinton-1_DR
scaffold_22378	6301	6400	chrUn	0	0	20.1924	6	open sea	0	GSONMT00025964001	.	.	.	.
scaffold_224	67901	68000	chrUn_21	0	0	89.8458	2	open sea	612	GSONMT00072440001	MCH2_ONCKE	Pro-MCH 2	6e-15	.
scaffold_224	265501	265600	chrUn_21	0	0	24.1384	6	open sea	0	GSONMT00072464001	GALT8_HUMAN	Probable polypeptide N-acetylgalactosaminyltransferase 8	6e-114	.
scaffold_2244	52101	52200	chrUn	0	0	42.3036	4	shelf	0	GSONMT00015382001	CAV1_TAKRU	Caveolin-1	7e-117	.
scaffold_2247	17701	17800	chrUn_9	0	0	39.085	3	open sea	.	.	.	.	.	.
scaffold_2247	18701	18800	chrUn_9	0	0	26.9166	3	open sea	.	.	.	.	.	.
scaffold_22477	501	600	chrUn	0	0	41.786	3	open sea	.	.	.	.	.	.
scaffold_22483	501	600	chrUn	0	0	25.9714	2	open sea	.	.	.	.	.	.
scaffold_2249	105701	105800	chrUn	0	0	22.3433	2	shore	0	GSONMT00026307001	CELR1_MOUSE	Cadherin EGF LAG seven-pass G-type receptor 1	0	.
scaffold_22499	6101	6200	chrUn	0	0	22.6806	8	open sea	.	.	.	.	.	.
scaffold_225	223701	223800	chrUn_19	0	0	-87.9373	8	island	.	.	.	.	.	.
scaffold_2254	59401	59500	chrUn	0	0	23.8306	6	island	.	.	.	.	.	ID=RM1083189;Name=RM1083189;Note=Motif:Gypsy-12_GA-I-int
scaffold_2254	59501	59600	chrUn	0	0	23.2292	3	shore	.	.	.	.	.	.
scaffold_2257	44001	44100	chrUn	0	0	22.8807	1	shore	0	GSONMT00013584001	.	.	.	.
scaffold_2259	42901	43000	chrUn	0	0	21.2142	4	open sea	.	.	.	.	.	.
scaffold_226	339101	339200	chr_5	0	0	41.0413	3	open sea	-5549	GSONMT00072555001	TP8L1_DANRE	Tumor necrosis factor alpha-induced protein 8-like protein 1	4e-122	.
scaffold_226	440401	440500	chr_5	0	0	20.2624	2	shore	8178	GSONMT00072558001	ZFR_MOUSE	Zinc finger RNA-binding protein	0	.
scaffold_22606	601	700	chrUn	0	0	23.556	2	open sea	.	.	.	.	.	.
scaffold_2267	57801	57900	chrUn	0	0	19.523	2	shore	.	.	.	.	.	ID=RM1086033;Name=RM1086033;Note=Motif:TC1_FR2
scaffold_227	701501	701600	chrUn_12	0	0	20.3362	2	open sea	.	.	.	.	.	ID=RM1086997;Name=RM1086997;Note=Motif:Gypsy-31_GA-I-int
scaffold_227	866301	866400	chrUn_12	0	0	24.6353	1	shelf	5951	GSONMT00072605001	CLMP_HUMAN	CXADR-like membrane protein	2e-29	.
scaffold_2272	51301	51400	chrUn	0	0	39.9618	3	open sea	.	.	.	.	.	.
scaffold_2275	4201	4300	chrUn_11	0	0	23.5911	6	open sea	0	GSONMT00051417001	MAGI2_RAT	Membrane-associated guanylate kinase, WW and PDZ domain-containing protein 2	2e-54	.
scaffold_2276	1	100	chrUn_5	0	0	29.2117	2	open sea	0	GSONMT00001027001	SC16A_HUMAN	Protein transport protein Sec16A	4e-38	.
scaffold_2278	3301	3400	chrUn	0	0	23.3709	5	shore	-4068	GSONMT00044707001	FBX11_RAT	F-box only protein 11	1e-88	.
scaffold_228	630301	630400	chrUn	0	0	30.0386	10	island	0	GSONMT00072653001	RN19B_DANRE	E3 ubiquitin-protein ligase RNF19B	0	.
scaffold_22825	1901	2000	chrUn	0	0	20.2768	2	open sea	.	.	.	.	.	.
scaffold_22825	4501	4600	chrUn	0	0	22.8049	2	shore	.	.	.	.	.	ID=RM1090367;Name=RM1090367;Note=Motif:TZF28C
scaffold_229	493401	493500	chrUn_15	0	0	22.01	2	open sea	0	GSONMT00072699001	SCN5A_MOUSE	Sodium channel protein type 5 subunit alpha	0	.
scaffold_229	703101	703200	chrUn_15	0	0	31.735	3	shelf	-3839	GSONMT00072703001	WDR48_HUMAN	WD repeat-containing protein 48	0	.
scaffold_229	947301	947400	chrUn_15	0	0	25.0344	1	open sea	0	GSONMT00072715001	DYH5_HUMAN	Dynein heavy chain 5, axonemal	0	.
scaffold_229	1009901	1010000	chrUn_15	0	0	23.2964	3	island	.	.	.	.	.	.
scaffold_229	1066901	1067000	chrUn_15	0	0	21.0471	2	shore	.	.	.	.	.	ID=RM1092304;Name=RM1092304;Note=Motif:Tc1-4Ory
scaffold_2294	63901	64000	chrUn	0	0	24.2958	3	shelf	.	.	.	.	.	.
scaffold_23	859401	859500	chrUn_Sex	0	0	26.5278	2	shore	.	.	.	.	.	.
scaffold_23	924501	924600	chrUn_Sex	0	0	21.9317	6	open sea	0	GSONMT00072761001	STK11_CHICK	Serine/threonine-protein kinase STK11	2e-40	.
scaffold_23	1030701	1030800	chrUn_Sex	0	0	85.3449	7	island	0	GSONMT00072765001	AIF1L_MOUSE	Allograft inflammatory factor 1-like	1e-60	.
scaffold_23	1030801	1030900	chrUn_Sex	0	0	90.5479	6	island	0	GSONMT00072765001	AIF1L_MOUSE	Allograft inflammatory factor 1-like	1e-60	.
scaffold_23	1031401	1031500	chrUn_Sex	0	0	21.2206	7	shore	0	GSONMT00072765001	AIF1L_MOUSE	Allograft inflammatory factor 1-like	1e-60	.
scaffold_23	1475201	1475300	chrUn_Sex	0	0	95.2165	5	open sea	0	GSONMT00072784001	FNBP1_XENLA	Formin-binding protein 1 homolog	5e-106	.
scaffold_23	1657001	1657100	chrUn_Sex	0	0	21.2913	7	open sea	0	GSONMT00072787001	CO5A1_HUMAN	Collagen alpha-1(V) chain	1e-119	.
scaffold_23	2248601	2248700	chrUn_Sex	0	0	27.9321	5	open sea	0	GSONMT00072795001	.	.	.	.
scaffold_23	2295601	2295700	chrUn_Sex	0	0	19.7107	1	shore	0	GSONMT00072798001	FA69B_XENTR	Protein FAM69B	0	.
scaffold_23	2458901	2459000	chrUn_Sex	0	0	29.5532	5	shore	.	.	.	.	.	.
scaffold_23	2459001	2459100	chrUn_Sex	0	0	23.0604	7	island	.	.	.	.	.	.
scaffold_230	575901	576000	chrUn_8	0	0	38.7352	8	open sea	.	.	.	.	.	.
scaffold_23015	301	400	chrUn	0	0	20.5135	3	open sea	.	.	.	.	.	.
scaffold_23046	3501	3600	chrUn	0	0	26.838	3	open sea	.	.	.	.	.	.
scaffold_23098	4701	4800	chrUn	0	0	27.0579	2	open sea	.	.	.	.	.	.
scaffold_23108	3401	3500	chrUn	0	0	31.8395	10	shore	0	GSONMT00048456001	IRS2_MOUSE	Insulin receptor substrate 2	0	.
scaffold_2313	63501	63600	chrUn_9	0	0	24.9911	3	shelf	.	.	.	.	.	.
scaffold_2317	51901	52000	chrUn	0	0	49.5991	5	open sea	.	.	.	.	.	.
scaffold_232	393101	393200	chrUn_17	0	0	22.5911	2	shelf	-655	GSONMT00072908001	.	.	.	.
scaffold_232	799701	799800	chrUn_17	0	0	23.1391	4	shore	.	.	.	.	.	.
scaffold_2321	98701	98800	chrUn_23	0	0	51.2955	2	open sea	0	GSONMT00003259001	OPN3_HUMAN	Opsin-3	5e-131	.
scaffold_2321	98801	98900	chrUn_23	0	0	61.7442	4	open sea	0	GSONMT00003259001	OPN3_HUMAN	Opsin-3	5e-131	.
scaffold_23228	5801	5900	chrUn	0	0	56.9089	4	open sea	.	.	.	.	.	.
scaffold_2323	32401	32500	chrUn	0	0	28.9647	5	shelf	0	GSONMT00013545001	TBAT_ONCMY	Tubulin alpha chain, testis-specific	5e-163	.
scaffold_2326	31501	31600	chrUn	0	0	24.8017	6	open sea	0	GSONMT00006226001	FGL1_BOVIN	Fibrinogen-like protein 1	2e-22	.
scaffold_2329	10201	10300	chrUn_10	0	0	25.4246	4	open sea	.	.	.	.	.	.
scaffold_233	844401	844500	chrUn_7	0	0	34.7133	6	open sea	.	.	.	.	.	.
scaffold_2330	47301	47400	chrUn	0	0	29.3675	3	open sea	.	.	.	.	.	ID=RM1104482;Name=RM1104482;Note=Motif:REX1-1_AFC
scaffold_2336	85801	85900	chrUn	0	0	25.6118	7	open sea	.	.	.	.	.	.
scaffold_23371	5001	5100	chrUn_2	0	0	22.9091	4	open sea	.	.	.	.	.	.
scaffold_234	90101	90200	chrUn_2	0	0	26.4151	3	shore	.	.	.	.	.	.
scaffold_234	681801	681900	chrUn_2	0	0	37.2577	4	open sea	.	.	.	.	.	.
scaffold_23419	4701	4800	chrUn	0	0	91.7081	3	open sea	.	.	.	.	.	.
scaffold_23419	4801	4900	chrUn	0	0	90.49	3	open sea	.	.	.	.	.	.
scaffold_2342	52501	52600	chrUn	0	0	19.7426	4	island	0	GSONMT00037127001	FEM1A_DANRE	Protein fem-1 homolog A	6e-62	.
scaffold_2346	20701	20800	chrUn	0	0	32.9012	1	open sea	.	.	.	.	.	.
scaffold_23464	5401	5500	chrUn	0	0	22.0379	3	open sea	.	.	.	.	.	ID=RM1108077;Name=RM1108077;Note=Motif:CR1-40_DR
scaffold_23486	3801	3900	chrUn	0	0	81.3526	3	open sea	.	.	.	.	.	.
scaffold_23486	3901	4000	chrUn	0	0	73.179	5	open sea	.	.	.	.	.	.
scaffold_235	266301	266400	chrUn_1	0	0	20.959	2	shore	6248	GSONMT00073066001	SUN2_HUMAN	SUN domain-containing protein 2	1e-54	.
scaffold_235	586401	586500	chrUn_1	0	0	22.6454	3	island	.	.	.	.	.	ID=RM1108964;Name=RM1108964;Note=Motif:Gypsy-10_GA-I-int
scaffold_235	701301	701400	chrUn_1	0	0	21.4739	4	open sea	.	.	.	.	.	.
scaffold_235	777101	777200	chrUn_1	0	0	20.4467	6	island	.	.	.	.	.	.
scaffold_2353	27201	27300	chrUn	0	0	42.9685	2	open sea	.	.	.	.	.	.
scaffold_2357	61801	61900	chrUn	0	0	22.1303	3	open sea	0	GSONMT00050046001	GBRB2_RAT	Gamma-aminobutyric acid receptor subunit beta-2	1e-169	.
scaffold_2360	75001	75100	chrUn	0	0	51.6807	5	open sea	0	GSONMT00028963001	CPNE8_MOUSE	Copine-8	2e-83	.
scaffold_23605	4101	4200	chrUn	0	0	20.6876	4	open sea	.	.	.	.	.	ID=RM1111831;Name=RM1111831;Note=Motif:TC1_FR3
scaffold_2362	36401	36500	chrUn	0	0	21.0466	1	shore	3250	GSONMT00036456001	ALPK3_MOUSE	Alpha-protein kinase 3	4e-62	.
scaffold_23622	501	600	chrUn	0	0	26.0404	2	open sea	.	.	.	.	.	.
scaffold_23622	601	700	chrUn	0	0	20.1988	4	open sea	.	.	.	.	.	.
scaffold_2365	86301	86400	chrUn_14	0	0	-45.915	12	open sea	-241	GSONMT00023496001	EF1G_CARAU	Elongation factor 1-gamma	2e-45	.
scaffold_23681	5201	5300	chrUn	0	0	23.1793	2	open sea	.	.	.	.	.	ID=RM1113058;Name=RM1113058;Note=Motif:L1-1_DR
scaffold_23691	1301	1400	chrUn	0	0	23.8021	3	shore	.	.	.	.	.	.
scaffold_237	840701	840800	chrUn_11	0	0	-48.3561	7	island	.	.	.	.	.	.
scaffold_237	941401	941500	chrUn_11	0	0	29.6246	2	open sea	.	.	.	.	.	.
scaffold_2371	10801	10900	chrUn	0	0	24.9145	1	open sea	-2283	GSONMT00032113001	CPLX4_MOUSE	Complexin-4	4e-35	.
scaffold_2375	96701	96800	chrUn	0	0	19.5039	7	island	.	.	.	.	.	.
scaffold_23765	1801	1900	chrUn	0	0	20.6953	4	shore	.	.	.	.	.	ID=RM1115145;Name=RM1115145;Note=Motif:REX1-1_AFC
scaffold_238	291801	291900	chrUn_4	0	0	24.411	2	open sea	.	.	.	.	.	.
scaffold_238	291901	292000	chrUn_4	0	0	22.3617	5	open sea	.	.	.	.	.	.
scaffold_23840	4701	4800	chrUn	0	0	47.2769	4	shore	.	.	.	.	.	.
scaffold_23840	4801	4900	chrUn	0	0	66.2915	2	shore	.	.	.	.	.	.
scaffold_2388	59301	59400	chrUn	0	0	28.7411	7	island	-6515	GSONMT00056199001	ARFP1_HUMAN	Arfaptin-1	3e-165	.
scaffold_23881	3701	3800	chrUn	0	0	20.1108	9	island	.	.	.	.	.	.
scaffold_23892	501	600	chrUn	0	0	27.4353	1	open sea	.	.	.	.	.	ID=RM1117848;Name=RM1117848;Note=Motif:Tc1-2_FR
scaffold_2391	8701	8800	chrUn	0	0	27.1174	2	open sea	-2397	GSONMT00035441001	RIMS2_HUMAN	Regulating synaptic membrane exocytosis protein 2	8e-90	.
scaffold_2392	72801	72900	chrUn	0	0	95.095	3	open sea	0	GSONMT00023016001	.	.	.	.
scaffold_23935	301	400	chrUn	0	0	21.2354	2	open sea	-4357	GSONMT00029855001	AA3R_RABIT	Adenosine receptor A3	3e-76	.
scaffold_2397	89601	89700	chrUn_18	0	0	28.7662	2	open sea	0	GSONMT00010832001	CREB5_MOUSE	Cyclic AMP-responsive element-binding protein 5	5e-52	.
scaffold_23979	4701	4800	chrUn	0	0	36.3314	4	shore	0	GSONMT00059431001	TTLL3_DANRE	Tubulin monoglycylase TTLL3	3e-51	.
scaffold_23987	2001	2100	chrUn	0	0	19.6045	2	open sea	.	.	.	.	.	ID=RM1120059;Name=RM1120059;Note=Motif:REX1-1_AFC
scaffold_23998	801	900	chrUn	0	0	20.8005	2	shore	3577	GSONMT00029195001	PLXB2_MOUSE	Plexin-B2	1e-67	.
scaffold_24	787401	787500	chr_17	0	0	34.0157	4	open sea	7031	GSONMT00073286001	.	.	.	.
scaffold_24	936001	936100	chr_17	0	0	72.3738	7	open sea	0	GSONMT00073293001	SRF_HUMAN	Serum response factor	2e-32	.
scaffold_24	1723501	1723600	chr_17	0	0	89.2723	5	shelf	0	GSONMT00073328001	TRAF5_MOUSE	TNF receptor-associated factor 5	5e-104	.
scaffold_24	2007401	2007500	chr_17	0	0	24.1912	4	shore	-7701	GSONMT00073339001	CATL1_CHLAE	Cathepsin L1	2e-71	.
scaffold_24	2127301	2127400	chr_17	0	0	22.8722	6	shore	.	.	.	.	.	.
scaffold_24	2127901	2128000	chr_17	0	0	19.709	4	shore	.	.	.	.	.	.
scaffold_24015	301	400	chrUn	0	0	21.7331	1	open sea	.	.	.	.	.	.
scaffold_2403	88001	88100	chrUn_13	0	0	32.2339	7	shore	0	GSONMT00030034001	.	.	.	.
scaffold_2405	93901	94000	chrUn	0	0	29.4986	4	open sea	.	.	.	.	.	.
scaffold_2406	62701	62800	chrUn_5	0	0	23.6658	8	island	0	GSONMT00032724001	F163A_HUMAN	Protein FAM163A	1e-28	.
scaffold_24075	3101	3200	chrUn	0	0	22.3973	3	open sea	.	.	.	.	.	.
scaffold_241	371001	371100	chrUn_29	0	0	23.5128	3	shore	.	.	.	.	.	ID=RM1124659;Name=RM1124659;Note=Motif:Gypsy-166-I_DR-int
scaffold_241	583801	583900	chrUn_29	0	0	69.137	2	open sea	0	GSONMT00073401001	TGFA1_MOUSE	Transforming growth factor-beta receptor-associated protein 1	0	.
scaffold_241	645001	645100	chrUn_29	0	0	21.3695	2	shore	.	.	.	.	.	.
scaffold_2412	29301	29400	chrUn	0	0	22.6802	2	open sea	4561	GSONMT00055274001	CBX7_RAT	Chromobox protein homolog 7	3e-28	.
scaffold_242	110101	110200	chrUn_29	0	0	29.8536	3	shelf	.	.	.	.	.	.
scaffold_242	575901	576000	chrUn_29	0	0	54.0846	5	shore	0	GSONMT00073432001	ASAP2_HUMAN	Arf-GAP with SH3 domain, ANK repeat and PH domain-containing protein 2	2e-28	.
scaffold_24201	3301	3400	chrUn	0	0	19.8861	5	open sea	.	.	.	.	.	.
scaffold_24207	1801	1900	chrUn	0	0	33.4972	2	open sea	.	.	.	.	.	.
scaffold_2425	15501	15600	chrUn_1	0	0	20.2155	2	open sea	0	GSONMT00033638001	RGS7_MOUSE	Regulator of G-protein signaling 7	1e-27	.
scaffold_24272	2201	2300	chrUn	0	0	50.1163	6	open sea	.	.	.	.	.	.
scaffold_24278	901	1000	chrUn	0	0	21.6391	6	shore	141	GSONMT00046701001	.	.	.	.
scaffold_243	231601	231700	chrUn_4	0	0	22.0092	4	shore	.	.	.	.	.	.
scaffold_243	429901	430000	chrUn_4	0	0	19.9564	7	island	.	.	.	.	.	.
scaffold_24366	1101	1200	chrUn	0	0	21.6088	3	open sea	.	.	.	.	.	ID=RM1130806;Name=RM1130806;Note=Motif:CR1-40_DR
scaffold_244	22101	22200	chrUn_12	0	0	25.8556	6	open sea	.	.	.	.	.	.
scaffold_244	56801	56900	chrUn_12	0	0	26.5684	2	open sea	.	.	.	.	.	ID=RM1131303;Name=RM1131303;Note=Motif:TZF28B
scaffold_244	217501	217600	chrUn_12	0	0	-87.0553	6	island	0	GSONMT00073495001	HXB1_CYPCA	Homeobox protein Hox-B1	3e-138	.
scaffold_244	217601	217700	chrUn_12	0	0	-79.9214	8	shore	0	GSONMT00073495001	HXB1_CYPCA	Homeobox protein Hox-B1	3e-138	.
scaffold_244	242701	242800	chrUn_12	0	0	-81.1772	4	shore	0	GSONMT00073496001	HXB3A_DANRE	Homeobox protein Hox-B3a	0	.
scaffold_244	242801	242900	chrUn_12	0	0	-85.0114	8	island	0	GSONMT00073496001	HXB3A_DANRE	Homeobox protein Hox-B3a	0	.
scaffold_244	249701	249800	chrUn_12	0	0	-62.4458	8	island	-6641	GSONMT00073496001	HXB3A_DANRE	Homeobox protein Hox-B3a	0	.
scaffold_244	832801	832900	chrUn_12	0	0	21.6266	3	open sea	0	GSONMT00073543001	K1C1_CARAU	Keratin, type I cytoskeletal 50 kDa	7e-143	.
scaffold_2445	88101	88200	chrUn	0	0	21.5211	3	shelf	.	.	.	.	.	ID=RM1132987;Name=RM1132987;Note=Motif:REX1-1_AFC
scaffold_24469	2601	2700	chrUn	0	0	23.0552	2	open sea	.	.	.	.	.	.
scaffold_2455	46401	46500	chrUn	0	0	24.5743	7	open sea	0	GSONMT00023985001	DPYD_DANRE	Dihydropyrimidine dehydrogenase	4e-54	.
scaffold_246	7701	7800	chrUn_8	0	0	23.5288	3	open sea	-6474	GSONMT00073661001	TMM68_HUMAN	Transmembrane protein 68	2e-161	.
scaffold_246	236501	236600	chrUn_8	0	0	29.0338	6	island	7338	GSONMT00073677001	CADH6_BOVIN	Cadherin-6	7e-113	.
scaffold_246	1039201	1039300	chrUn_8	0	0	30.5043	4	open sea	0	GSONMT00073698001	KCNB2_RABIT	Potassium voltage-gated channel subfamily B member 2	0	.
scaffold_24619	1401	1500	chrUn	0	0	21.0189	4	shelf	.	.	.	.	.	ID=RM1136862;Name=RM1136862;Note=Motif:CR1-40_DR
scaffold_2463	24701	24800	chrUn	0	0	24.5671	2	open sea	.	.	.	.	.	.
scaffold_2463	24801	24900	chrUn	0	0	25.799	5	open sea	.	.	.	.	.	.
scaffold_2465	90201	90300	chrUn	0	0	31.575	2	open sea	.	.	.	.	.	ID=RM1137387;Name=RM1137387;Note=Motif:TZF28B
scaffold_24655	4101	4200	chrUn	0	0	20.3336	4	open sea	.	.	.	.	.	.
scaffold_24700	4301	4400	chrUn	0	0	19.5513	3	shore	.	.	.	.	.	ID=RM1138902;Name=RM1138902;Note=Motif:Ronin1_I-int
scaffold_24751	4901	5000	chrUn	0	0	28.1204	2	open sea	.	.	.	.	.	.
scaffold_24757	3501	3600	chrUn	0	0	25.2289	4	shore	.	.	.	.	.	.
scaffold_24775	5301	5400	chrUn	0	0	-42.6844	6	open sea	-1155	GSONMT00027349001	.	.	.	.
scaffold_24792	5001	5100	chrUn	0	0	66.9645	6	shore	.	.	.	.	.	.
scaffold_248	1601	1700	chrUn	0	0	24.5531	4	island	.	.	.	.	.	ID=RM1140248;Name=RM1140248;Note=Motif:Gypsy-10_GA-I-int
scaffold_248	900601	900700	chrUn	0	0	33.0662	6	open sea	0	GSONMT00073797001	PATL1_DANRE	Protein PAT1 homolog 1	0	.
scaffold_248	900701	900800	chrUn	0	0	28.3093	3	open sea	0	GSONMT00073797001	PATL1_DANRE	Protein PAT1 homolog 1	0	.
scaffold_248	1117401	1117500	chrUn	0	0	39.879	4	open sea	-467	GSONMT00073806001	TM134_MOUSE	Transmembrane protein 134	2e-41	.
scaffold_2481	84401	84500	chrUn_26	0	0	24.2984	8	island	.	.	.	.	.	.
scaffold_2481	84501	84600	chrUn_26	0	0	23.6671	5	island	.	.	.	.	.	ID=RM1141487;Name=RM1141487;Note=Motif:Gypsy-35_GA-I-int
scaffold_24858	401	500	chrUn	0	0	22.1589	3	open sea	.	.	.	.	.	.
scaffold_2486	85501	85600	chrUn	0	0	28.5191	2	shore	9152	GSONMT00027517001	NPFF2_HUMAN	Neuropeptide FF receptor 2	3e-112	.
scaffold_24876	3001	3100	chrUn	0	0	66.1941	4	shelf	.	.	.	.	.	.
scaffold_24876	3101	3200	chrUn	0	0	56.2861	5	shelf	.	.	.	.	.	.
scaffold_2492	35201	35300	chrUn_29	0	0	24.8283	1	shore	.	.	.	.	.	ID=RM1144028;Name=RM1144028;Note=Motif:Gypsy69-I_DR-int
scaffold_25	1665901	1666000	chrUn_19	0	0	-20.7422	5	shore	0	GSONMT00074015001	.	.	.	.
scaffold_25	1670801	1670900	chrUn_19	0	0	21.7595	4	open sea	-3690	GSONMT00074015001	.	.	.	.
scaffold_250	927201	927300	chrUn_15	0	0	22.3152	3	shore	0	GSONMT00074131001	HYAL2_HUMAN	Hyaluronidase-2	3e-155	.
scaffold_25003	4401	4500	chrUn	0	0	20.7192	3	open sea	.	.	.	.	.	ID=RM1147894;Name=RM1147894;Note=Motif:CR1-40_DR
scaffold_25075	2901	3000	chrUn	0	0	24.838	2	shore	.	.	.	.	.	.
scaffold_2519	33101	33200	chrUn	0	0	20.6601	4	shore	.	.	.	.	.	ID=RM1151110;Name=RM1151110;Note=Motif:Gypsy-8_GA-I-int
scaffold_25192	501	600	chrUn	0	0	25.7488	5	island	.	.	.	.	.	.
scaffold_2523	26601	26700	chrUn	0	0	20.697	9	island	0	GSONMT00050357001	SSR1_HUMAN	Somatostatin receptor type 1	2e-156	.
scaffold_25230	3301	3400	chrUn	0	0	23.2862	8	open sea	.	.	.	.	.	.
scaffold_2527	1901	2000	chrUn	0	0	50.1471	4	open sea	.	.	.	.	.	.
scaffold_253	696801	696900	chrUn_1	0	0	27.0924	3	shelf	.	.	.	.	.	.
scaffold_253	1072801	1072900	chrUn_1	0	0	23.625	1	open sea	-4483	GSONMT00074261001	T178A_DANRE	Transmembrane protein 178A	3e-168	.
scaffold_25302	2101	2200	chrUn	0	0	20.2381	4	open sea	.	.	.	.	.	ID=RM1154341;Name=RM1154341;Note=Motif:CR1-40_DR
scaffold_25316	2901	3000	chrUn	0	0	23.7435	4	island	.	.	.	.	.	.
scaffold_2534	37901	38000	chrUn	0	0	45.7932	2	open sea	.	.	.	.	.	.
scaffold_2535	64901	65000	chrUn	0	0	25.8097	5	open sea	.	.	.	.	.	ID=RM1154910;Name=RM1154910;Note=Motif:Gypsy138-I_DR-int
scaffold_2535	65001	65100	chrUn	0	0	22.9867	3	open sea	.	.	.	.	.	ID=RM1154910;Name=RM1154910;Note=Motif:Gypsy138-I_DR-int
scaffold_25352	401	500	chrUn	0	0	42.6606	4	shelf	.	.	.	.	.	.
scaffold_25352	501	600	chrUn	0	0	42.6025	7	shelf	.	.	.	.	.	.
scaffold_25352	3801	3900	chrUn	0	0	23.1621	12	island	.	.	.	.	.	.
scaffold_25352	3901	4000	chrUn	0	0	24.5482	6	island	.	.	.	.	.	.
scaffold_25352	4001	4100	chrUn	0	0	41.0764	5	island	.	.	.	.	.	.
scaffold_25383	701	800	chrUn	0	0	22.0389	2	open sea	.	.	.	.	.	ID=RM1155431;Name=RM1155431;Note=Motif:TC1_FR1
scaffold_254	502701	502800	chrUn_11	0	0	29.4397	2	shelf	.	.	.	.	.	.
scaffold_254	553901	554000	chrUn_11	0	0	22.112	3	open sea	.	.	.	.	.	.
scaffold_254	1082601	1082700	chrUn_11	0	0	20.6064	1	open sea	.	.	.	.	.	.
scaffold_2546	24101	24200	chrUn_24	0	0	19.8978	2	open sea	0	GSONMT00015452001	S13A2_MOUSE	Solute carrier family 13 member 2	3e-154	.
scaffold_25478	2301	2400	chrUn_16	0	0	30.2126	5	open sea	0	GSONMT00038704001	ITA3_BOVIN	Integrin alpha-3	1e-92	.
scaffold_25478	2401	2500	chrUn_16	0	0	26.5242	3	open sea	0	GSONMT00038704001	ITA3_BOVIN	Integrin alpha-3	1e-92	.
scaffold_2551	17801	17900	chrUn	0	0	22.4263	2	open sea	-6156	GSONMT00002523001	S12A9_XENLA	Solute carrier family 12 member 9	5e-111	.
scaffold_2551	62201	62300	chrUn	0	0	22.7069	2	shore	.	.	.	.	.	ID=RM1159033;Name=RM1159033;Note=Motif:Gypsy-29_GA-I-int
scaffold_2554	14001	14100	chrUn	0	0	28.0759	1	open sea	.	.	.	.	.	.
scaffold_2556	13401	13500	chrUn_5	0	0	20.4732	1	open sea	.	.	.	.	.	ID=RM1159699;Name=RM1159699;Note=Motif:CR1-40_DR
scaffold_256	786001	786100	chrUn_11	0	0	20.9858	3	shore	0	GSONMT00074396001	FBCD1_XENTR	Fibrinogen C domain-containing protein 1	8e-64	.
scaffold_25615	3501	3600	chrUn	0	0	25.4459	5	shore	.	.	.	.	.	ID=RM1161239;Name=RM1161239;Note=Motif:Ronin2_I-int
scaffold_257	499801	499900	chrUn_12	0	0	28.5537	3	shelf	0	GSONMT00074433001	KCNJ6_RAT	G protein-activated inward rectifier potassium channel 2	0	.
scaffold_257	523601	523700	chrUn_12	0	0	19.6619	3	shore	-5716	GSONMT00074433001	KCNJ6_RAT	G protein-activated inward rectifier potassium channel 2	0	.
scaffold_257	943001	943100	chrUn_12	0	0	24.7708	3	open sea	3885	GSONMT00074449001	NUP88_HUMAN	Nuclear pore complex protein Nup88	0	.
scaffold_25712	5101	5200	chrUn	0	0	91.6745	4	open sea	.	.	.	.	.	.
scaffold_258	54901	55000	chrUn_16	0	0	20.4154	2	open sea	0	GSONMT00074461001	L1CAM_TAKRU	Neural cell adhesion molecule L1	0	.
scaffold_258	422201	422300	chrUn_16	0	0	27.494	3	open sea	0	GSONMT00074475001	V2R_CANFA	Vasopressin V2 receptor	6e-93	.
scaffold_258	455701	455800	chrUn_16	0	0	34.0322	2	open sea	.	.	.	.	.	.
scaffold_258	604301	604400	chrUn_16	0	0	25.6144	7	island	0	GSONMT00074485001	ADCY6_HUMAN	Adenylate cyclase type 6	0	.
scaffold_2581	16401	16500	chrUn	0	0	23.7463	4	shore	.	.	.	.	.	ID=RM1165718;Name=RM1165718;Note=Motif:Ronin1_I-int
scaffold_2586	52001	52100	chrUn	0	0	23.5489	4	open sea	.	.	.	.	.	ID=RM1166392;Name=RM1166392;Note=Motif:REX1-1_AFC
scaffold_259	116901	117000	chrUn_8	0	0	20.7801	2	shore	.	.	.	.	.	ID=RM1166982;Name=RM1166982;Note=Motif:Gypsy-31_GA-I-int
scaffold_259	373101	373200	chrUn_8	0	0	37.8653	2	open sea	.	.	.	.	.	.
scaffold_259	373201	373300	chrUn_8	0	0	28.1614	4	open sea	.	.	.	.	.	.
scaffold_259	683201	683300	chrUn_8	0	0	19.855	2	open sea	.	.	.	.	.	ID=RM1167413;Name=RM1167413;Note=Motif:REX1-1_AFC
scaffold_259	1040901	1041000	chrUn_8	0	0	21.0472	8	shelf	.	.	.	.	.	.
scaffold_2592	53901	54000	chrUn_11	0	0	41.1732	2	shelf	0	GSONMT00030878001	ZFHX4_CHICK	Zinc finger homeobox protein 4	0	.
scaffold_2592	54001	54100	chrUn_11	0	0	24.648	4	shelf	0	GSONMT00030878001	ZFHX4_CHICK	Zinc finger homeobox protein 4	0	.
scaffold_2592	60701	60800	chrUn_11	0	0	21.2069	3	shelf	0	GSONMT00030878001	ZFHX4_CHICK	Zinc finger homeobox protein 4	0	.
scaffold_2596	13901	14000	chrUn	0	0	-62.9576	9	island	-4268	GSONMT00001157001	MPP8_HUMAN	M-phase phosphoprotein 8	2e-17	.
scaffold_25960	301	400	chrUn	0	0	22.9955	5	shore	.	.	.	.	.	.
scaffold_26	501801	501900	chrUn_22	0	0	23.7582	1	shelf	0	GSONMT00074542001	S4A10_BOVIN	Sodium-driven chloride bicarbonate exchanger	0	.
scaffold_26	1415801	1415900	chrUn_22	0	0	27.0561	2	open sea	0	GSONMT00074574001	ABCBB_HUMAN	Bile salt export pump	0	.
scaffold_260	154901	155000	chrUn_10	0	0	50.143	5	open sea	.	.	.	.	.	.
scaffold_260	155001	155100	chrUn_10	0	0	37.2753	2	open sea	.	.	.	.	.	.
scaffold_2603	54601	54700	chrUn	0	0	21.3985	1	shore	.	.	.	.	.	ID=RM1171906;Name=RM1171906;Note=Motif:Gypsy-10_GA-I-int
scaffold_26043	5001	5100	chrUn_16	0	0	-23.9917	6	shelf	.	.	.	.	.	.
scaffold_2605	88701	88800	chrUn_Sex	0	0	37.3007	6	open sea	.	.	.	.	.	.
scaffold_2608	7701	7800	chrUn	0	0	-35.5025	4	shore	.	.	.	.	.	.
scaffold_2608	7801	7900	chrUn	0	0	-39.4396	7	island	.	.	.	.	.	ID=RM1172532;Name=RM1172532;Note=Motif:Gypsy-165-I_DR-int
scaffold_261	77401	77500	chrUn_16	0	0	-21.059	8	island	3018	GSONMT00074676001	RND2_MOUSE	Rho-related GTP-binding protein RhoN	2e-75	.
scaffold_261	82901	83000	chrUn_16	0	0	22.1032	1	shore	0	GSONMT00074676001	RND2_MOUSE	Rho-related GTP-binding protein RhoN	2e-75	.
scaffold_261	542801	542900	chrUn_16	0	0	24.0513	7	open sea	0	GSONMT00074700001	HARB1_XENLA	Putative nuclease HARBI1	5e-47	.
scaffold_261	998701	998800	chrUn_16	0	0	21.8973	2	open sea	6231	GSONMT00074723001	UBP31_HUMAN	Ubiquitin carboxyl-terminal hydrolase 31	0	.
scaffold_26100	2201	2300	chrUn	0	0	24.1528	2	island	.	.	.	.	.	.
scaffold_26100	2301	2400	chrUn	0	0	20.2776	3	shore	.	.	.	.	.	.
scaffold_26115	1	100	chrUn	0	0	32.395	8	open sea	.	.	.	.	.	.
scaffold_262	311801	311900	chrUn_8	0	0	23.9011	4	shore	.	.	.	.	.	.
scaffold_262	710001	710100	chrUn_8	0	0	38.0331	2	open sea	1049	GSONMT00074750001	.	.	.	.
scaffold_262	913801	913900	chrUn_8	0	0	21.7986	2	shelf	0	GSONMT00074761001	NCKX4_MOUSE	Sodium/potassium/calcium exchanger 4	0	.
scaffold_262	966201	966300	chrUn_8	0	0	20.5055	3	island	0	GSONMT00074762001	TM121_CHICK	Transmembrane protein 121	0	.
scaffold_26203	3101	3200	chrUn	0	0	24.495	5	shore	.	.	.	.	.	.
scaffold_26231	3701	3800	chrUn	0	0	22.0023	6	island	.	.	.	.	.	.
scaffold_26257	101	200	chrUn	0	0	32.9301	4	shore	.	.	.	.	.	.
scaffold_263	627001	627100	chrUn_9	0	0	23.4108	1	open sea	.	.	.	.	.	.
scaffold_263	759601	759700	chrUn_9	0	0	19.5292	3	shore	0	GSONMT00074781001	NWD2_HUMAN	NACHT and WD repeat domain-containing protein 2	0	.
scaffold_263	817501	817600	chrUn_9	0	0	25.0229	4	open sea	.	.	.	.	.	ID=RM1177744;Name=RM1177744;Note=Motif:Gypsy128-I_DR-int
scaffold_26331	1501	1600	chrUn	0	0	28.2063	2	open sea	.	.	.	.	.	ID=RM1178425;Name=RM1178425;Note=Motif:TC1_FR3
scaffold_2638	801	900	chrUn	0	0	83.3526	5	island	0	GSONMT00040037001	CEGTB_XENLA	Ceramide glucosyltransferase-B	3e-33	.
scaffold_264	1043101	1043200	chrUn_29	0	0	24.8181	7	open sea	.	.	.	.	.	.
scaffold_2640	64601	64700	chrUn	0	0	43.1667	2	open sea	.	.	.	.	.	.
scaffold_2646	12301	12400	chrUn_29	0	0	23.7366	2	open sea	0	GSONMT00015857001	AKAP6_RAT	A-kinase anchor protein 6	1e-24	.
scaffold_265	430901	431000	chrUn_27	0	0	71.341	3	shore	0	GSONMT00074838001	KCNK6_HUMAN	Potassium channel subfamily K member 6	2e-72	.
scaffold_265	999301	999400	chrUn_27	0	0	79.4415	6	shelf	5017	GSONMT00074882001	DLLC_DANRE	Delta-like protein C	0	.
scaffold_2651	30301	30400	chrUn	0	0	20.1143	2	open sea	.	.	.	.	.	.
scaffold_26552	2001	2100	chrUn	0	0	20.2389	4	open sea	0	GSONMT00025456001	CANX_CHICK	Calpain-1 catalytic subunit	3e-109	.
scaffold_2657	46901	47000	chrUn	0	0	-35.3591	5	open sea	-1880	GSONMT00035976001	CSCL2_HUMAN	CSC1-like protein 2	3e-42	.
scaffold_2659	2201	2300	chrUn	0	0	26.3044	4	island	.	.	.	.	.	.
scaffold_266	1057001	1057100	chrUn_6	0	0	20.9053	6	open sea	.	.	.	.	.	.
scaffold_26727	3401	3500	chrUn	0	0	86.3493	6	open sea	.	.	.	.	.	.
scaffold_26769	1301	1400	chrUn	0	0	-62.9855	7	shore	0	GSONMT00033075001	.	.	.	.
scaffold_26769	1501	1600	chrUn	0	0	-66.5652	8	island	0	GSONMT00033075001	.	.	.	.
scaffold_26769	1601	1700	chrUn	0	0	-78.206	6	island	0	GSONMT00033075001	.	.	.	.
scaffold_2684	59001	59100	chrUn	0	0	25.8798	1	open sea	.	.	.	.	.	.
scaffold_26862	3201	3300	chrUn	0	0	85.5354	5	open sea	.	.	.	.	.	.
scaffold_2698	74401	74500	chrUn	0	0	20.8567	4	shelf	.	.	.	.	.	.
scaffold_27	223401	223500	chr_22	1.72e-10	9.76e-12	20.8508	6	shore	0	GSONMT00075066001	FMNL2_HUMAN	Formin-like protein 2	0	.
scaffold_27	530501	530600	chr_22	0	0	27.3598	2	shore	0	GSONMT00075073001	KALRN_HUMAN	Kalirin	0	.
scaffold_27	534401	534500	chr_22	0	0	21.9719	1	shelf	0	GSONMT00075073001	KALRN_HUMAN	Kalirin	0	.
scaffold_27	2054001	2054100	chr_22	0	0	20.0676	5	shelf	.	.	.	.	.	.
scaffold_270	265301	265400	chrUn_1	0	0	71.1815	3	open sea	0	GSONMT00075160001	NCOAT_RAT	Bifunctional protein NCOAT	2e-89	.
scaffold_270	663401	663500	chrUn_1	0	0	35.1166	2	open sea	.	.	.	.	.	.
scaffold_270	858201	858300	chrUn_1	0	0	66.123	4	open sea	.	.	.	.	.	.
scaffold_2702	69601	69700	chrUn	0	0	22.8378	4	open sea	.	.	.	.	.	.
scaffold_2702	69701	69800	chrUn	0	0	30.2371	9	open sea	.	.	.	.	.	.
scaffold_27024	701	800	chrUn	0	0	36.913	4	open sea	.	.	.	.	.	.
scaffold_2706	58401	58500	chrUn	0	0	22.271	6	open sea	.	.	.	.	.	.
scaffold_2708	67201	67300	chrUn	0	0	33.1517	2	open sea	.	.	.	.	.	.
scaffold_271	30701	30800	chrUn_6	0	0	38.8609	8	island	-952	GSONMT00075189001	GNA14_XENLA	Guanine nucleotide-binding protein subunit alpha-14	0	.
scaffold_271	31001	31100	chrUn_6	0	0	21.1683	7	island	-1252	GSONMT00075189001	GNA14_XENLA	Guanine nucleotide-binding protein subunit alpha-14	0	.
scaffold_271	643101	643200	chrUn_6	0	0	25.7741	2	open sea	.	.	.	.	.	.
scaffold_271	700301	700400	chrUn_6	0	0	22.7351	6	open sea	0	GSONMT00075233001	AL3B1_HUMAN	Aldehyde dehydrogenase family 3 member B1	7e-150	.
scaffold_2714	82801	82900	chrUn	0	0	21.0604	1	shore	.	.	.	.	.	ID=RM1196690;Name=RM1196690;Note=Motif:CR1-40_DR
scaffold_2716	12301	12400	chrUn	0	0	22.0027	2	open sea	.	.	.	.	.	.
scaffold_27172	4501	4600	chrUn	0	0	20.6693	3	open sea	.	.	.	.	.	.
scaffold_273	253201	253300	chrUn_12	0	0	24.4824	1	open sea	.	.	.	.	.	.
scaffold_2734	38801	38900	chrUn	0	0	21.3934	2	shore	0	GSONMT00001063001	BCAR1_HUMAN	Breast cancer anti-estrogen resistance protein 1	0	.
scaffold_2738	59501	59600	chrUn_3	0	0	90.9571	5	open sea	.	.	.	.	.	.
scaffold_274	959301	959400	chrUn_16	0	0	28.5905	4	open sea	0	GSONMT00075404001	ADAM9_HUMAN	Disintegrin and metalloproteinase domain-containing protein 9	0	.
scaffold_274	984001	984100	chrUn_16	0	0	36.0962	7	open sea	8269	GSONMT00075404001	ADAM9_HUMAN	Disintegrin and metalloproteinase domain-containing protein 9	0	.
scaffold_274	984101	984200	chrUn_16	0	0	29.9497	3	open sea	8369	GSONMT00075404001	ADAM9_HUMAN	Disintegrin and metalloproteinase domain-containing protein 9	0	.
scaffold_2740	35501	35600	chrUn	0	0	22.2743	1	shelf	0	GSONMT00015768001	PIAS4_MOUSE	E3 SUMO-protein ligase PIAS4	3e-99	.
scaffold_2746	80501	80600	chrUn_15	0	0	23.3085	2	open sea	.	.	.	.	.	.
scaffold_2749	73501	73600	chrUn	0	0	38.4762	5	open sea	.	.	.	.	.	.
scaffold_27500	4201	4300	chrUn	0	0	20.6311	8	shore	.	.	.	.	.	.
scaffold_2751	82601	82700	chrUn_14	0	0	27.0578	2	open sea	.	.	.	.	.	.
scaffold_27516	2301	2400	chrUn	0	0	70.0341	6	open sea	.	.	.	.	.	.
scaffold_2758	42001	42100	chrUn	0	0	21.4625	1	shore	0	GSONMT00062050001	KCJ16_RAT	Inward rectifier potassium channel 16	4e-114	.
scaffold_276	663701	663800	chrUn_19	0	0	28.4323	4	shore	-2062	GSONMT00075514001	RYR3_RABIT	Ryanodine receptor 3	3e-87	.
scaffold_276	980701	980800	chrUn_19	0	0	25.325	3	open sea	0	GSONMT00075534001	CRIM1_CHICK	Cysteine-rich motor neuron 1 protein	0	.
scaffold_277	52701	52800	chrUn_5	0	0	30.4072	6	open sea	-4095	GSONMT00075535001	CAH8_HUMAN	Carbonic anhydrase-related protein	7e-166	.
scaffold_277	52801	52900	chrUn_5	0	0	42.6307	3	open sea	-4195	GSONMT00075535001	CAH8_HUMAN	Carbonic anhydrase-related protein	7e-166	.
scaffold_277	368601	368700	chrUn_5	0	0	21.3158	4	open sea	.	.	.	.	.	.
scaffold_2771	75901	76000	chrUn_4	0	0	29.6895	4	open sea	.	.	.	.	.	.
scaffold_2774	22301	22400	chrUn	0	0	80.068	4	open sea	0	GSONMT00033850001	RARAB_DANRE	Retinoic acid receptor alpha-B	1e-28	.
scaffold_2774	22801	22900	chrUn	0	0	95.0263	4	open sea	0	GSONMT00033850001	RARAB_DANRE	Retinoic acid receptor alpha-B	1e-28	.
scaffold_27761	2701	2800	chrUn	0	0	60.8671	2	open sea	.	.	.	.	.	.
scaffold_278	19901	20000	chrUn_1	0	0	24.6241	3	open sea	0	GSONMT00075569001	BIC1B_XENLA	Protein bicaudal C homolog 1-B	1e-162	.
scaffold_27898	4401	4500	chrUn	0	0	30.9021	3	shelf	2818	GSONMT00020014001	CNG1_CHICK	Cyclic nucleotide-gated channel cone photoreceptor subunit alpha	0	.
scaffold_279	26901	27000	chrUn	0	0	29.5401	2	open sea	-1379	GSONMT00075612001	NEU1_ONCKE	Isotocin-neurophysin IT 1	6e-110	.
scaffold_279	259301	259400	chrUn	0	0	25.7517	5	open sea	0	GSONMT00075625001	NACC2_MOUSE	Nucleus accumbens-associated protein 2	0	.
scaffold_279	385501	385600	chrUn	0	0	43.7999	3	open sea	.	.	.	.	.	.
scaffold_27994	1401	1500	chrUn	0	0	20.2046	4	open sea	.	.	.	.	.	ID=RM1213562;Name=RM1213562;Note=Motif:Gypsy-11_GA-I-int
scaffold_27998	1401	1500	chrUn	0	0	59.2319	4	open sea	.	.	.	.	.	.
scaffold_28	164201	164300	chrUn_1	0	0	60.6769	4	island	.	.	.	.	.	.
scaffold_28	256501	256600	chrUn_1	0	0	20.4753	2	island	-5292	GSONMT00075649001	LARP6_HUMAN	La-related protein 6	4e-49	.
scaffold_28	863601	863700	chrUn_1	0	0	19.9333	1	shore	.	.	.	.	.	ID=RM1214277;Name=RM1214277;Note=Motif:Gypsy-10_GA-I-int
scaffold_280	115901	116000	chr_19	0	0	90.7646	2	open sea	-377	GSONMT00075755001	TM260_MOUSE	Transmembrane protein 260	0	.
scaffold_280	116001	116100	chr_19	0	0	42.5194	4	open sea	-277	GSONMT00075755001	TM260_MOUSE	Transmembrane protein 260	0	.
scaffold_2801	8101	8200	chrUn_18	0	0	20.6213	3	island	0	GSONMT00039521001	IRS1_RAT	Insulin receptor substrate 1	3e-106	.
scaffold_2804	55801	55900	chrUn_28	0	0	96.3598	7	open sea	0	GSONMT00048512001	ANGL4_PIG	Angiopoietin-related protein 4	6e-104	.
scaffold_2804	55901	56000	chrUn_28	0	0	87.7123	2	open sea	0	GSONMT00048512001	ANGL4_PIG	Angiopoietin-related protein 4	6e-104	.
scaffold_2804	56001	56100	chrUn_28	0	0	52.4505	5	open sea	0	GSONMT00048512001	ANGL4_PIG	Angiopoietin-related protein 4	6e-104	.
scaffold_28090	3001	3100	chrUn	0	0	22.8548	7	open sea	.	.	.	.	.	ID=RM1217352;Name=RM1217352;Note=Motif:CR1-40_DR
scaffold_281	34501	34600	chrUn_4	0	0	43.8418	4	open sea	7260	GSONMT00075805001	K1107_MOUSE	Uncharacterized protein KIAA1107	2e-34	.
scaffold_28134	1901	2000	chrUn	0	0	27.4212	1	shore	.	.	.	.	.	ID=RM1218726;Name=RM1218726;Note=Motif:Gypsy104-I_Dr-int
scaffold_28194	1301	1400	chrUn	0	0	19.6009	6	island	.	.	.	.	.	.
scaffold_282	148001	148100	chrUn_17	0	0	33.8526	2	open sea	5071	GSONMT00075843001	FGD5_HUMAN	FYVE, RhoGEF and PH domain-containing protein 5	7e-107	.
scaffold_282	319001	319100	chrUn_17	0	0	20.9876	6	shore	0	GSONMT00075851001	ERBB4_RAT	Receptor tyrosine-protein kinase erbB-4	4e-42	.
scaffold_282	319101	319200	chrUn_17	0	0	20.3067	3	shore	0	GSONMT00075851001	ERBB4_RAT	Receptor tyrosine-protein kinase erbB-4	4e-42	.
scaffold_28200	1901	2000	chrUn	0	0	-73.0384	6	island	.	.	.	.	.	.
scaffold_28200	2001	2100	chrUn	0	0	-75.1142	9	island	.	.	.	.	.	.
scaffold_2821	60301	60400	chrUn	0	0	-32.4497	2	shore	0	GSONMT00045962001	SKDA1_HUMAN	SKI/DACH domain-containing protein 1	3e-69	.
scaffold_2827	31201	31300	chrUn	0	0	28.8099	3	open sea	.	.	.	.	.	.
scaffold_2831	30901	31000	chrUn	0	0	32.7606	6	island	.	.	.	.	.	.
scaffold_2831	67501	67600	chrUn	0	0	47.4912	2	open sea	.	.	.	.	.	.
scaffold_28371	3101	3200	chrUn	0	0	26.4703	5	open sea	.	.	.	.	.	.
scaffold_284	567501	567600	chrUn_16	0	0	34.6744	2	open sea	-7098	GSONMT00075944001	.	.	.	.
scaffold_284	1006501	1006600	chrUn_16	0	0	82.4804	4	open sea	.	.	.	.	.	.
scaffold_2846	39501	39600	chrUn	0	0	88.9854	4	open sea	0	GSONMT00049809001	RARGA_DANRE	Retinoic acid receptor gamma-A	8e-165	.
scaffold_28488	2701	2800	chrUn	0	0	20.719	5	open sea	.	.	.	.	.	.
scaffold_285	173101	173200	chrUn_12	0	0	24.2334	1	open sea	.	.	.	.	.	.
scaffold_285	203501	203600	chrUn_12	0	0	29.0766	3	shore	0	GSONMT00075969001	SEZ6_XENLA	Seizure protein 6 homolog	0	.
scaffold_285	230901	231000	chrUn_12	0	0	22.2341	6	island	0	GSONMT00075969001	SEZ6_XENLA	Seizure protein 6 homolog	0	.
scaffold_285	231001	231100	chrUn_12	0	0	47.2519	5	island	0	GSONMT00075969001	SEZ6_XENLA	Seizure protein 6 homolog	0	.
scaffold_28548	3601	3700	chrUn	0	0	23.0353	4	open sea	.	.	.	.	.	.
scaffold_28548	3701	3800	chrUn	0	0	24.9522	3	open sea	.	.	.	.	.	.
scaffold_2855	22201	22300	chrUn	0	0	19.8291	4	shelf	.	.	.	.	.	.
scaffold_2856	26801	26900	chrUn_13	0	0	74.3394	5	open sea	.	.	.	.	.	.
scaffold_2856	55401	55500	chrUn_13	0	0	39.2868	7	shore	-717	GSONMT00010944001	.	.	.	.
scaffold_2856	55501	55600	chrUn_13	0	0	32.212	6	shore	-817	GSONMT00010944001	.	.	.	.
scaffold_2859	67201	67300	chrUn	0	0	31.6344	3	open sea	0	GSONMT00023855001	KIN17_MOUSE	DNA/RNA-binding protein KIN17	3e-150	.
scaffold_286	111201	111300	chrUn_2	0	0	19.5735	2	open sea	-662	GSONMT00076018001	BMP2_RABIT	Bone morphogenetic protein 2	6e-53	.
scaffold_28655	3101	3200	chrUn	0	0	66.5215	5	open sea	.	.	.	.	.	.
scaffold_2868	20301	20400	chrUn	0	0	19.743	3	open sea	-3535	GSONMT00017296001	LIPA2_MOUSE	Liprin-alpha-2	4e-151	.
scaffold_2869	23101	23200	chrUn_10	0	0	26.7953	4	shore	.	.	.	.	.	.
scaffold_2869	23201	23300	chrUn_10	0	0	39.9653	8	island	.	.	.	.	.	.
scaffold_287	27501	27600	chrUn_17	0	0	37.2931	2	open sea	0	GSONMT00076076001	CA050_DANRE	Uncharacterized protein C1orf50 homolog	2e-113	.
scaffold_287	733201	733300	chrUn_17	0	0	25.3956	11	island	0	GSONMT00076119001	RBM15_HUMAN	Putative RNA-binding protein 15	0	.
scaffold_2871	68201	68300	chrUn	0	0	24.9402	3	open sea	-2307	GSONMT00041100001	.	.	.	.
scaffold_2873	36201	36300	chrUn_20	0	0	27.1897	6	shore	.	.	.	.	.	ID=RM1230966;Name=RM1230966;Note=Motif:Ronin1_I-int
scaffold_2875	301	400	chrUn	0	0	21.8678	5	shore	.	.	.	.	.	.
scaffold_2875	15801	15900	chrUn	0	0	19.7597	1	open sea	.	.	.	.	.	.
scaffold_2877	501	600	chrUn	0	0	22.2126	5	open sea	.	.	.	.	.	.
scaffold_2878	40601	40700	chrUn	0	0	33.1248	5	open sea	.	.	.	.	.	.
scaffold_2883	13901	14000	chrUn	0.0189807	0.000874281	-25.2196	8	shore	.	.	.	.	.	.
scaffold_28887	3201	3300	chrUn	0	0	20.1866	3	shore	.	.	.	.	.	.
scaffold_2889	27701	27800	chrUn_5	0	0	21.9971	5	open sea	.	.	.	.	.	.
scaffold_289	635101	635200	chrUn	0	0	20.2195	3	open sea	0	GSONMT00076197001	C1TC_PONAB	C-1-tetrahydrofolate synthase, cytoplasmic	4e-91	.
scaffold_2890	16001	16100	chrUn_18	0	0	31.1606	2	open sea	.	.	.	.	.	.
scaffold_28900	301	400	chrUn	0	0	21.7179	3	shore	.	.	.	.	.	ID=RM1234480;Name=RM1234480;Note=Motif:REX1-1_AFC
scaffold_28908	3201	3300	chrUn	0	0	24.8638	4	open sea	.	.	.	.	.	.
scaffold_2897	61801	61900	chrUn	0	0	22.9345	5	open sea	.	.	.	.	.	.
scaffold_29	23001	23100	chrUn_1	0	0	19.6829	4	shore	-6647	GSONMT00076211001	PLIN1_HUMAN	Perilipin-1	1e-38	.
scaffold_29	599401	599500	chrUn_1	0	0	23.0854	4	shore	.	.	.	.	.	ID=RM1236058;Name=RM1236058;Note=Motif:CR1-40_DR
scaffold_29	1603501	1603600	chrUn_1	0	0	53.1889	3	open sea	.	.	.	.	.	.
scaffold_29	1664601	1664700	chrUn_1	0	0	23.4325	2	shore	.	.	.	.	.	ID=RM1236714;Name=RM1236714;Note=Motif:Ronin1_I-int
scaffold_29	1736201	1736300	chrUn_1	0	0	30.0966	6	shore	0	GSONMT00076247001	CHKA_HUMAN	Choline kinase alpha	0	.
scaffold_29002	1501	1600	chrUn	0	0	22.3959	3	open sea	.	.	.	.	.	.
scaffold_29012	1801	1900	chrUn	0	0	20.304	4	open sea	.	.	.	.	.	.
scaffold_2904	24001	24100	chrUn_Sex	0	0	22.7715	2	open sea	.	.	.	.	.	.
scaffold_29048	4301	4400	chrUn	0	0	21.6755	3	open sea	.	.	.	.	.	.
scaffold_2905	13801	13900	chrUn	0	0	19.5906	2	open sea	-4108	GSONMT00022909001	ARRD3_MOUSE	Arrestin domain-containing protein 3	1e-61	.
scaffold_2906	20201	20300	chrUn_20	0	0	22.1759	1	shore	.	.	.	.	.	.
scaffold_29096	701	800	chrUn	0	0	22.6214	7	shelf	-655	GSONMT00046771001	ACOT1_RAT	Acyl-coenzyme A thioesterase 1	3e-123	.
scaffold_29096	801	900	chrUn	0	0	32.2893	8	shelf	-555	GSONMT00046771001	ACOT1_RAT	Acyl-coenzyme A thioesterase 1	3e-123	.
scaffold_291	334901	335000	chrUn_10	0	0	24.0382	5	island	-1449	GSONMT00076328001	MPZL1_BOVIN	Myelin protein zero-like protein 1	6e-41	.
scaffold_29125	1601	1700	chrUn	0	0	19.7	3	open sea	0	GSONMT00040732001	LPHN1_BOVIN	Latrophilin-1	2e-34	.
scaffold_292	149001	149100	chrUn_1	0	0	37.6657	2	open sea	.	.	.	.	.	ID=RM1241364;Name=RM1241364;Note=Motif:Tc1-2_FR
scaffold_292	432301	432400	chrUn_1	0	0	73.2157	4	island	742	GSONMT00076351001	CE290_HUMAN	Centrosomal protein of 290 kDa	5e-17	.
scaffold_292	432401	432500	chrUn_1	0	0	51.382	6	island	842	GSONMT00076351001	CE290_HUMAN	Centrosomal protein of 290 kDa	5e-17	.
scaffold_292	890601	890700	chrUn_1	0	0	20.306	5	open sea	506	GSONMT00076361001	NEUT_BOVIN	Neurotensin/neuromedin N	2e-14	.
scaffold_292	897801	897900	chrUn_1	0	0	22.1828	6	shore	0	GSONMT00076361001	NEUT_BOVIN	Neurotensin/neuromedin N	2e-14	.
scaffold_292	897901	898000	chrUn_1	0	0	22.4451	4	shore	0	GSONMT00076361001	NEUT_BOVIN	Neurotensin/neuromedin N	2e-14	.
scaffold_292	898201	898300	chrUn_1	0	0	31.3961	8	shore	0	GSONMT00076361001	NEUT_BOVIN	Neurotensin/neuromedin N	2e-14	.
scaffold_29203	4101	4200	chrUn	0	0	23.2605	6	open sea	.	.	.	.	.	.
scaffold_29207	2301	2400	chrUn	0	0	28.2896	6	shore	0	GSONMT00007832001	ADCY9_CHICK	Adenylate cyclase type 9	0	.
scaffold_29290	1601	1700	chrUn	0	0	30.6968	2	open sea	.	.	.	.	.	.
scaffold_294	82501	82600	chrUn_11	0	0	28.0866	8	island	.	.	.	.	.	.
scaffold_294	176101	176200	chrUn_11	0	0	93.2732	5	island	.	.	.	.	.	.
scaffold_294	176201	176300	chrUn_11	0	0	96.9365	5	island	.	.	.	.	.	.
scaffold_294	396301	396400	chrUn_11	0	0	27.4563	5	open sea	.	.	.	.	.	.
scaffold_294	402201	402300	chrUn_11	0	0	20.1661	3	open sea	.	.	.	.	.	.
scaffold_294	437001	437100	chrUn_11	0	0	21.7076	3	shore	.	.	.	.	.	ID=RM1245398;Name=RM1245398;Note=Motif:Gypsy-10_GA-I-int
scaffold_294	657301	657400	chrUn_11	0	0	28.9094	2	open sea	.	.	.	.	.	.
scaffold_29430	2301	2400	chrUn	0	0	-69.1026	3	open sea	.	.	.	.	.	.
scaffold_29430	2401	2500	chrUn	0	0	-81.6802	6	open sea	.	.	.	.	.	.
scaffold_295	603401	603500	chrUn_12	0	0	27.2288	7	open sea	-1172	GSONMT00076439001	TEN2_HUMAN	Teneurin-2	0	.
scaffold_295	951001	951100	chrUn_12	0	0	27.6987	3	open sea	0	GSONMT00076444001	GRIA1_HUMAN	Glutamate receptor 1	0	.
scaffold_29586	2301	2400	chrUn	0	0	72.7003	6	open sea	.	.	.	.	.	.
scaffold_29586	2401	2500	chrUn	0	0	93.3342	3	open sea	.	.	.	.	.	ID=RM1248784;Name=RM1248784;Note=Motif:hAT-2n1_DR
scaffold_296	29601	29700	chrUn	0	0	19.9451	5	island	0	GSONMT00076445001	LRIT1_HUMAN	Leucine-rich repeat, immunoglobulin-like domain and transmembrane domain-containing protein 1	7e-123	.
scaffold_296	364201	364300	chrUn	0	0	23.6476	2	open sea	-5655	GSONMT00076454001	SMOC2_HUMAN	SPARC-related modular calcium-binding protein 2	1e-126	.
scaffold_296	678801	678900	chrUn	0	0	22.3283	1	open sea	.	.	.	.	.	ID=RM1249495;Name=RM1249495;Note=Motif:REX1-1_AFC
scaffold_296	1016901	1017000	chrUn	0	0	19.6719	5	open sea	.	.	.	.	.	ID=RM1249816;Name=RM1249816;Note=Motif:REX1-1_AFC
scaffold_2964	37301	37400	chrUn	0	0	22.7883	3	open sea	-7600	GSONMT00054307001	MPI1A_XENLA	M-phase inducer phosphatase 1-A	1e-15	.
scaffold_29660	3901	4000	chrUn	0	0	22.6048	2	shore	.	.	.	.	.	.
scaffold_29681	701	800	chrUn	0	0	19.9873	3	open sea	-508	GSONMT00060337001	CO7A1_MOUSE	Collagen alpha-1(VII) chain	5e-80	.
scaffold_29696	1401	1500	chrUn	0	0	25.871	4	shore	0	GSONMT00017625001	LRC61_MOUSE	Leucine-rich repeat-containing protein 61	2e-43	.
scaffold_297	468701	468800	chrUn_22	0	0	22.5048	2	open sea	.	.	.	.	.	ID=RM1251373;Name=RM1251373;Note=Motif:Gypsy-43_GA-I-int
scaffold_297	813901	814000	chrUn_22	0	0	25.2399	3	open sea	.	.	.	.	.	ID=RM1251682;Name=RM1251682;Note=Motif:Gypsy107-I_Dr-int
scaffold_297	944701	944800	chrUn_22	0	0	66.1421	3	shore	.	.	.	.	.	.
scaffold_297	944801	944900	chrUn_22	0	0	42.4094	11	shore	.	.	.	.	.	.
scaffold_2972	6501	6600	chrUn_4	0	0	29.1673	3	open sea	.	.	.	.	.	.
scaffold_2972	28501	28600	chrUn_4	0	0	20.9577	3	shore	.	.	.	.	.	.
scaffold_2973	8701	8800	chrUn	0	0	27.7447	9	island	0	GSONMT00046989001	SCN8A_RAT	Sodium channel protein type 8 subunit alpha	6e-88	.
scaffold_2973	19801	19900	chrUn	0	0	25.739	3	open sea	0	GSONMT00046989001	SCN8A_RAT	Sodium channel protein type 8 subunit alpha	6e-88	.
scaffold_29751	1901	2000	chrUn	0	0	19.9509	2	open sea	.	.	.	.	.	.
scaffold_2979	41001	41100	chrUn	0	0	26.5225	2	open sea	.	.	.	.	.	.
scaffold_298	179401	179500	chrUn_4	0	0	29.8452	3	shelf	0	GSONMT00076494001	DPOLZ_MOUSE	DNA polymerase zeta catalytic subunit	0	.
scaffold_298	179601	179700	chrUn_4	0	0	25.1583	3	shelf	0	GSONMT00076494001	DPOLZ_MOUSE	DNA polymerase zeta catalytic subunit	0	.
scaffold_298	223901	224000	chrUn_4	0	0	76.9186	3	shore	0	GSONMT00076496001	FYN_XIPHE	Tyrosine-protein kinase Fyn	0	.
scaffold_298	389501	389600	chrUn_4	0	0	21.1046	3	open sea	.	.	.	.	.	.
scaffold_298	682001	682100	chrUn_4	0	0	20.6377	4	open sea	.	.	.	.	.	.
scaffold_298	759301	759400	chrUn_4	0	0	26.5444	7	island	.	.	.	.	.	.
scaffold_2987	64901	65000	chrUn	0	0	41.5404	7	open sea	0	GSONMT00046774001	ITB5_BOVIN	Integrin beta-5	0	.
scaffold_299	16401	16500	chrUn_8	0	0	23.6391	3	open sea	3831	GSONMT00076523001	SYNE2_MOUSE	Nesprin-2	3e-53	.
scaffold_299	393201	393300	chrUn_8	0	0	21.067	2	open sea	.	.	.	.	.	.
scaffold_299	571501	571600	chrUn_8	0	0	70.0575	5	open sea	0	GSONMT00076535001	TF3B_MOUSE	Transcription factor IIIB 90 kDa subunit	3e-102	.
scaffold_299	683001	683100	chrUn_8	0	0	-80.2944	8	open sea	0	GSONMT00076538001	.	.	.	.
scaffold_29916	1801	1900	chrUn	0	0	-57.1807	5	shore	.	.	.	.	.	.
scaffold_2993	39801	39900	chrUn_17	0	0	-55.5457	7	island	-1338	GSONMT00025035001	NLRC3_HUMAN	Protein NLRC3	6e-49	.
scaffold_2993	39901	40000	chrUn_17	0	0	-57.1674	8	island	-1438	GSONMT00025035001	NLRC3_HUMAN	Protein NLRC3	6e-49	.
scaffold_2993	59801	59900	chrUn_17	0	0	22.3527	7	open sea	0	GSONMT00025040001	KCNQ5_HUMAN	Potassium voltage-gated channel subfamily KQT member 5	2e-68	.
scaffold_2996	71001	71100	chrUn	0	0	66.8115	6	shore	0	GSONMT00017928001	OTOGL_HUMAN	Otogelin-like protein	0	.
scaffold_29992	801	900	chrUn	0	0	21.0355	3	open sea	.	.	.	.	.	ID=RM1256746;Name=RM1256746;Note=Motif:Ronin3_I-int
scaffold_3	34501	34600	chr_19	0	0	30.4447	3	shore	0	GSONMT00076552001	ACTC_RAT	Actin, alpha cardiac muscle 1	0	.
scaffold_3	483101	483200	chr_19	0	0	80.7748	3	open sea	.	.	.	.	.	.
scaffold_3	599101	599200	chr_19	0	0	20.0039	2	open sea	.	.	.	.	.	.
scaffold_3	2285301	2285400	chr_19	0	0	20.1014	5	shore	0	GSONMT00076653001	ESR2_MICUN	Estrogen receptor beta	0	.
scaffold_3	2524401	2524500	chr_19	0	0	19.7922	3	open sea	.	.	.	.	.	ID=RM1258652;Name=RM1258652;Note=Motif:TZF28B
scaffold_3	3409401	3409500	chr_19	0	0	20.8152	6	shore	0	GSONMT00076723001	UNC79_MOUSE	Protein unc-79 homolog	5e-152	.
scaffold_30	692101	692200	chrUn_29	0	0	43.3434	6	open sea	.	.	.	.	.	.
scaffold_30	692201	692300	chrUn_29	0	0	49.2459	5	open sea	.	.	.	.	.	.
scaffold_30	1332801	1332900	chrUn_29	0	0	31.765	4	shore	-7156	GSONMT00076781001	P20D2_MOUSE	Peptidase M20 domain-containing protein 2	1e-169	.
scaffold_30	1832001	1832100	chrUn_29	0	0	19.5585	5	open sea	.	.	.	.	.	.
scaffold_30	2192401	2192500	chrUn_29	0	0	21.8075	5	island	.	.	.	.	.	ID=RM1261557;Name=RM1261557;Note=Motif:CR1-40_DR
scaffold_30	2282701	2282800	chrUn_29	0	0	21.1261	5	open sea	.	.	.	.	.	.
scaffold_30	2307801	2307900	chrUn_29	0	0	21.7356	1	shore	.	.	.	.	.	.
scaffold_30	2348701	2348800	chrUn_29	0	0	29.51	4	open sea	.	.	.	.	.	.
scaffold_300	680401	680500	chrUn_20	0	0	25.8744	7	open sea	0	GSONMT00076835001	GRB7_HUMAN	Growth factor receptor-bound protein 7	0	.
scaffold_300	831601	831700	chrUn_20	0	0	20.9386	4	open sea	2429	GSONMT00076843001	G6PC_HAPNU	Glucose-6-phosphatase	9e-178	.
scaffold_300	897201	897300	chrUn_20	0	0	23.2086	4	open sea	.	.	.	.	.	.
scaffold_3001	7201	7300	chrUn_1	0	0	22.35	2	open sea	0	GSONMT00049283001	ERMAP_HUMAN	Erythroid membrane-associated protein	3e-52	.
scaffold_3005	15401	15500	chrUn	0	0	55.688	8	island	.	.	.	.	.	.
scaffold_3005	15501	15600	chrUn	0	0	38.9452	8	island	.	.	.	.	.	.
scaffold_30106	301	400	chrUn	0	0	68.9254	4	open sea	0	GSONMT00053587001	ERMP1_HUMAN	Endoplasmic reticulum metallopeptidase 1	8e-47	.
scaffold_3011	22101	22200	chrUn	0	0	20.5195	2	open sea	0	GSONMT00056592001	GBGT1_CHICK	Globoside alpha-1,3-N-acetylgalactosaminyltransferase 1	4e-110	.
scaffold_302	484601	484700	chrUn_6	0	0	37.2202	4	open sea	0	GSONMT00076903001	F102A_XENLA	Protein FAM102A	4e-72	.
scaffold_30253	1501	1600	chrUn	0	0	20.9979	3	open sea	.	.	.	.	.	.
scaffold_30253	2401	2500	chrUn	0	0	19.6069	4	open sea	.	.	.	.	.	.
scaffold_303	829101	829200	chrUn_17	0	0	20.6766	4	island	-1041	GSONMT00076982001	CTRO_HUMAN	Citron Rho-interacting kinase	2e-164	.
scaffold_303	829501	829600	chrUn_17	0	0	20.833	4	island	-1441	GSONMT00076982001	CTRO_HUMAN	Citron Rho-interacting kinase	2e-164	.
scaffold_303	956301	956400	chrUn_17	0	0	20.6436	3	open sea	.	.	.	.	.	.
scaffold_3032	74101	74200	chrUn	0	0	22.6096	5	open sea	.	.	.	.	.	.
scaffold_3034	2501	2600	chrUn	0	0	27.3786	2	open sea	.	.	.	.	.	.
scaffold_3036	64701	64800	chrUn	0	0	20.5439	2	open sea	.	.	.	.	.	.
scaffold_304	846801	846900	chrUn_18	0	0	21.884	3	shore	-8574	GSONMT00024080001	GTR1_PIG	Solute carrier family 2, facilitated glucose transporter member 1	1e-78	.
scaffold_304	893201	893300	chrUn_18	0	0	28.5284	3	open sea	0	GSONMT00024083001	NPTX1_HUMAN	Neuronal pentraxin-1	8e-114	.
scaffold_3040	6401	6500	chrUn	0	0	36.3978	11	open sea	.	.	.	.	.	.
scaffold_3040	6601	6700	chrUn	0	0	21.5476	5	open sea	.	.	.	.	.	.
scaffold_30488	1301	1400	chrUn	0	0	30.9748	3	open sea	.	.	.	.	.	.
scaffold_305	492201	492300	chrUn_4	0	0	23.4852	4	shelf	-2424	GSONMT00008701001	PKHA7_MOUSE	Pleckstrin homology domain-containing family A member 7	7e-36	.
scaffold_305	676101	676200	chrUn_4	0	0	26.7233	3	open sea	0	GSONMT00008707001	.	.	.	.
scaffold_305	853501	853600	chrUn_4	0	0	21.818	4	open sea	.	.	.	.	.	.
scaffold_3050	4601	4700	chrUn	0	0	19.8134	6	shore	.	.	.	.	.	.
scaffold_3054	68201	68300	chrUn_12	0	0	-20.1222	4	shore	.	.	.	.	.	.
scaffold_3059	36601	36700	chrUn_11	0	0	19.6	2	shelf	0	GSONMT00020768001	TRPV4_HUMAN	Transient receptor potential cation channel subfamily V member 4	0	.
scaffold_306	40101	40200	chrUn_15	0	0	36.7624	5	open sea	.	.	.	.	.	.
scaffold_306	127601	127700	chrUn_15	0	0	31.0705	2	open sea	443	GSONMT00046318001	LRC30_HUMAN	Leucine-rich repeat-containing protein 30	8e-63	.
scaffold_306	162301	162400	chrUn_15	0	0	42.896	7	shore	-943	GSONMT00046319001	LAMA1_HUMAN	Laminin subunit alpha-1	1e-139	.
scaffold_306	162401	162500	chrUn_15	0	0	52.0135	8	shore	-843	GSONMT00046319001	LAMA1_HUMAN	Laminin subunit alpha-1	1e-139	.
scaffold_30610	501	600	chrUn	0	0	20.5928	4	open sea	.	.	.	.	.	.
scaffold_3065	26701	26800	chrUn	0	0	25.8453	3	island	-4666	GSONMT00044952001	S12A9_HUMAN	Solute carrier family 12 member 9	8e-102	.
scaffold_3066	18101	18200	chrUn	0	0	50.1457	5	open sea	0	GSONMT00023961001	JUN_MOUSE	Transcription factor AP-1	3e-132	.
scaffold_3066	18201	18300	chrUn	0	0	37.4286	5	open sea	0	GSONMT00023961001	JUN_MOUSE	Transcription factor AP-1	3e-132	.
scaffold_3066	18601	18700	chrUn	0	0	61.9209	5	open sea	0	GSONMT00023961001	JUN_MOUSE	Transcription factor AP-1	3e-132	.
scaffold_3066	18701	18800	chrUn	0	0	44.5094	6	open sea	0	GSONMT00023961001	JUN_MOUSE	Transcription factor AP-1	3e-132	.
scaffold_3066	18801	18900	chrUn	0	0	25.1185	3	open sea	0	GSONMT00023961001	JUN_MOUSE	Transcription factor AP-1	3e-132	.
scaffold_3066	18901	19000	chrUn	0	0	57.5693	3	open sea	0	GSONMT00023961001	JUN_MOUSE	Transcription factor AP-1	3e-132	.
scaffold_307	135001	135100	chrUn_15	0	0	34.6598	1	open sea	0	GSONMT00048543001	VTM2A_MOUSE	V-set and transmembrane domain-containing protein 2A	1e-67	.
scaffold_307	135101	135200	chrUn_15	0	0	21.5372	5	open sea	0	GSONMT00048543001	VTM2A_MOUSE	V-set and transmembrane domain-containing protein 2A	1e-67	.
scaffold_307	210901	211000	chrUn_15	0	0	29.0706	3	open sea	.	.	.	.	.	.
scaffold_307	356801	356900	chrUn_15	0	0	20.1856	4	open sea	.	.	.	.	.	.
scaffold_307	480401	480500	chrUn_15	0	0	24.7957	4	shelf	0	GSONMT00048548001	ZCHC2_RAT	Zinc finger CCHC domain-containing protein 2	1e-61	.
scaffold_307	855001	855100	chrUn_15	0	0	59.8402	2	open sea	0	GSONMT00048577001	.	.	.	.
scaffold_3071	15901	16000	chrUn	0	0	26.0262	3	shore	948	GSONMT00033343001	GPBAR_RAT	G-protein coupled bile acid receptor 1	3e-33	.
scaffold_30733	1001	1100	chrUn	0	0	23.2713	5	island	.	.	.	.	.	.
scaffold_3074	53301	53400	chrUn	0	0	28.0603	9	island	0	GSONMT00035275001	BIEA_HUMAN	Biliverdin reductase A	2e-95	.
scaffold_30745	901	1000	chrUn	0	0	27.5473	1	shore	.	.	.	.	.	.
scaffold_308	150701	150800	chrUn_9	0	0	21.3479	2	open sea	-2996	GSONMT00000768001	LADD_ONCMY	Ladderlectin	4e-41	.
scaffold_308	230201	230300	chrUn_9	0	0	37.1691	7	open sea	0	GSONMT00000770001	GP125_HUMAN	Probable G-protein coupled receptor 125	0	.
scaffold_308	235901	236000	chrUn_9	0	0	74.9365	5	open sea	0	GSONMT00000770001	GP125_HUMAN	Probable G-protein coupled receptor 125	0	.
scaffold_308	702101	702200	chrUn_9	0	0	20.4951	5	open sea	.	.	.	.	.	.
scaffold_308	734601	734700	chrUn_9	0	0	39.5099	2	shore	.	.	.	.	.	.
scaffold_3081	64201	64300	chrUn	0	0	20.862	1	shelf	.	.	.	.	.	.
scaffold_30816	3101	3200	chrUn	0	0	19.5491	6	open sea	.	.	.	.	.	.
scaffold_309	120801	120900	chrUn_7	0	0	26.0902	3	open sea	0	GSONMT00049770001	AA1R_RAT	Adenosine receptor A1	1e-46	.
scaffold_309	324201	324300	chrUn_7	0	0	32.6013	3	open sea	.	.	.	.	.	.
scaffold_3096	61301	61400	chrUn	0	0	62.0508	5	shelf	.	.	.	.	.	.
scaffold_30962	3501	3600	chrUn	0	0	24.4789	1	shore	.	.	.	.	.	.
scaffold_31	265701	265800	chrUn_2	0	0	44.4793	2	shore	.	.	.	.	.	.
scaffold_31	392401	392500	chrUn_2	0	0	20.3296	4	open sea	.	.	.	.	.	.
scaffold_31	1129001	1129100	chrUn_2	0	0	37.123	3	shore	7577	GSONMT00077041001	ISPD_DANRE	Isoprenoid synthase domain-containing protein	2e-12	.
scaffold_31	1129101	1129200	chrUn_2	0	0	34.58	3	shore	7477	GSONMT00077041001	ISPD_DANRE	Isoprenoid synthase domain-containing protein	2e-12	.
scaffold_310	186001	186100	chrUn_17	0	0	20.3944	1	shore	0	GSONMT00006100001	.	.	.	.
scaffold_31032	2001	2100	chrUn	0	0	28.1519	8	island	.	.	.	.	.	.
scaffold_3106	69101	69200	chrUn	0	0	19.9299	4	open sea	.	.	.	.	.	.
scaffold_3109	31801	31900	chrUn_18	0	0	22.5893	2	open sea	0	GSONMT00019455001	ENPP2_MOUSE	Ectonucleotide pyrophosphatase/phosphodiesterase family member 2	0	.
scaffold_311	44001	44100	chrUn_29	0	0	20.8558	1	shelf	0	GSONMT00026382001	FAT4_HUMAN	Protocadherin Fat 4	0	.
scaffold_311	44101	44200	chrUn_29	0	0	29.848	4	shelf	0	GSONMT00026382001	FAT4_HUMAN	Protocadherin Fat 4	0	.
scaffold_311	176601	176700	chrUn_29	0	0	21.6532	3	open sea	.	.	.	.	.	.
scaffold_311	862801	862900	chrUn_29	0	0	22.9718	5	open sea	.	.	.	.	.	.
scaffold_31100	1901	2000	chrUn	0	0	20.8269	2	open sea	.	.	.	.	.	ID=RM1285226;Name=RM1285226;Note=Motif:CR1-40_DR
scaffold_31132	201	300	chrUn	0	0	25.3244	6	open sea	.	.	.	.	.	ID=RM1285535;Name=RM1285535;Note=Motif:CR1-40_DR
scaffold_31137	4001	4100	chrUn	0	0	19.974	2	shore	.	.	.	.	.	ID=RM1285574;Name=RM1285574;Note=Motif:CR1-40_DR
scaffold_3114	25301	25400	chrUn	0	0	36.7284	13	open sea	.	.	.	.	.	.
scaffold_31152	1401	1500	chrUn	0	0	28.0577	8	open sea	.	.	.	.	.	.
scaffold_3119	55701	55800	chrUn	0	0	19.6586	1	shore	.	.	.	.	.	.
scaffold_312	625101	625200	chrUn_8	0	0	20.777	6	shore	2636	GSONMT00061492001	CFAB_GORGO	Complement factor B	5e-88	.
scaffold_3120	64501	64600	chrUn	0	0	22.7541	4	open sea	9050	GSONMT00059178001	ECLC_BOVIN	Epithelial chloride channel protein	6e-140	.
scaffold_3123	56401	56500	chrUn	0	0	25.0659	9	open sea	.	.	.	.	.	.
scaffold_3123	56501	56600	chrUn	0	0	39.0644	6	open sea	.	.	.	.	.	.
scaffold_3125	58401	58500	chrUn_18	0	0	25.7257	6	island	.	.	.	.	.	.
scaffold_31298	1001	1100	chrUn	0	0	20.9566	5	island	.	.	.	.	.	.
scaffold_31299	601	700	chrUn	0	0	-52.8061	5	open sea	.	.	.	.	.	.
scaffold_313	226001	226100	chrUn_26	0	0	26.1783	3	island	.	.	.	.	.	ID=RM1288371;Name=RM1288371;Note=Motif:Ronin1_I-int
scaffold_313	504501	504600	chrUn_26	0	0	21.2915	1	open sea	-9226	GSONMT00005820001	LGUL_RAT	Lactoylglutathione lyase	1e-83	.
scaffold_313	546301	546400	chrUn_26	0	0	50.6658	4	open sea	.	.	.	.	.	.
scaffold_313	831001	831100	chrUn_26	0	0	20.0143	4	open sea	.	.	.	.	.	.
scaffold_313	838001	838100	chrUn_26	0	0	23.6062	1	open sea	.	.	.	.	.	.
scaffold_313	880401	880500	chrUn_26	0	0	20.7411	2	shelf	.	.	.	.	.	.
scaffold_3136	29201	29300	chrUn	0	0	24.754	2	open sea	.	.	.	.	.	.
scaffold_314	53301	53400	chrUn_21	0	0	20.6997	6	island	.	.	.	.	.	.
scaffold_314	352101	352200	chrUn_21	0	0	27.3409	4	shelf	-4150	GSONMT00002172001	CDHR5_HUMAN	Cadherin-related family member 5	5e-31	.
scaffold_314	644801	644900	chrUn_21	0	0	25.2128	3	open sea	-1376	GSONMT00002198001	IAPP_CANFA	Islet amyloid polypeptide	2e-23	.
scaffold_314	662801	662900	chrUn_21	0	0	23.0261	3	open sea	1316	GSONMT00002199001	PLCL2_HUMAN	Inactive phospholipase C-like protein 2	0	.
scaffold_314	663001	663100	chrUn_21	0	0	42.733	3	open sea	1116	GSONMT00002199001	PLCL2_HUMAN	Inactive phospholipase C-like protein 2	0	.
scaffold_314	925601	925700	chrUn_21	0	0	30.0277	2	open sea	0	GSONMT00002204001	ABCD2_HUMAN	ATP-binding cassette sub-family D member 2	0	.
scaffold_3143	38701	38800	chrUn	0	0	20.39	3	shore	0	GSONMT00022156001	HNMT_CAVPO	Histamine N-methyltransferase	4e-84	.
scaffold_3143	58901	59000	chrUn	0	0	19.6949	2	open sea	7052	GSONMT00022156001	HNMT_CAVPO	Histamine N-methyltransferase	4e-84	.
scaffold_3147	69701	69800	chrUn_23	0	0	29.9882	2	open sea	.	.	.	.	.	.
scaffold_315	281001	281100	chrUn_24	0	0	20.2365	3	open sea	.	.	.	.	.	ID=RM1292239;Name=RM1292239;Note=Motif:REX1-1_AFC
scaffold_315	623701	623800	chrUn_24	0	0	22.6799	4	island	0	GSONMT00005328001	CABP8_HUMAN	Calcium-binding protein 8	3e-129	.
scaffold_315	957601	957700	chrUn_24	0	0	21.35	3	open sea	4311	GSONMT00005349001	DBLOH_MOUSE	Diablo homolog, mitochondrial	2e-56	.
scaffold_3155	11501	11600	chrUn	0	0	38.6852	2	open sea	8543	GSONMT00048531001	CANT1_RAT	Soluble calcium-activated nucleotidase 1	6e-71	.
scaffold_31581	2701	2800	chrUn	0	0	40.2672	6	island	0	GSONMT00004369001	EFCC1_HUMAN	EF-hand and coiled-coil domain-containing protein 1	2e-69	.
scaffold_3163	38501	38600	chrUn	0	0	79.2575	8	shelf	.	.	.	.	.	.
scaffold_3168	55201	55300	chrUn	0	0	24.8883	3	open sea	.	.	.	.	.	ID=RM1295302;Name=RM1295302;Note=Motif:Gypsy-35_GA-I-int
scaffold_3168	56201	56300	chrUn	0	0	19.8198	2	open sea	.	.	.	.	.	ID=RM1295302;Name=RM1295302;Note=Motif:Gypsy-35_GA-I-int
scaffold_317	828901	829000	chrUn_3	0	0	23.4262	2	shore	0	GSONMT00011067001	ADA15_HUMAN	Disintegrin and metalloproteinase domain-containing protein 15	0	.
scaffold_31733	2001	2100	chrUn	0	0	24.4971	2	shore	.	.	.	.	.	.
scaffold_3174	11301	11400	chrUn_8	0	0	24.6488	5	open sea	0	GSONMT00002868001	AT1A2_CHICK	Sodium/potassium-transporting ATPase subunit alpha-2	0	.
scaffold_3177	63201	63300	chrUn	0	0	19.7456	3	open sea	.	.	.	.	.	.
scaffold_3179	11901	12000	chrUn	0	0	-72.5005	6	shore	0	GSONMT00038401001	ZAR1_XENLA	Zygote arrest protein 1	2e-86	.
scaffold_3179	12001	12100	chrUn	0	0	-79.1155	5	shore	0	GSONMT00038401001	ZAR1_XENLA	Zygote arrest protein 1	2e-86	.
scaffold_31821	2701	2800	chrUn	0	0	26.4742	4	shore	.	.	.	.	.	.
scaffold_3186	30201	30300	chrUn	0	0	23.3919	4	open sea	.	.	.	.	.	.
scaffold_3186	30801	30900	chrUn	0	0	20.8003	4	open sea	.	.	.	.	.	.
scaffold_31875	601	700	chrUn	0	0	27.257	1	open sea	0	GSONMT00037685001	FXI1E_XENTR	Forkhead box protein I1-ema	7e-100	.
scaffold_31890	3101	3200	chrUn	0	0	23.1712	4	shore	.	.	.	.	.	ID=RM1298969;Name=RM1298969;Note=Motif:Gypsy64-I_DR-int
scaffold_319	208601	208700	chrUn_16	0	0	59.9749	4	open sea	0	GSONMT00034326001	EFHD2_RAT	EF-hand domain-containing protein D2	5e-89	.
scaffold_319	208701	208800	chrUn_16	0	0	52.7602	4	open sea	0	GSONMT00034326001	EFHD2_RAT	EF-hand domain-containing protein D2	5e-89	.
scaffold_319	495201	495300	chrUn_16	0	0	24.6215	2	shore	.	.	.	.	.	.
scaffold_3195	60301	60400	chrUn	0	0	29.0274	3	open sea	-5511	GSONMT00039562001	NATTL_DANRE	Natterin-like protein	2e-114	.
scaffold_3195	60401	60500	chrUn	0	0	42.3377	7	open sea	-5611	GSONMT00039562001	NATTL_DANRE	Natterin-like protein	2e-114	.
scaffold_31970	3901	4000	chrUn	0	0	21.2442	3	open sea	.	.	.	.	.	.
scaffold_32	308601	308700	chrUn_28	0	0	25.1596	2	island	0	GSONMT00077149001	CTND2_HUMAN	Catenin delta-2	0	.
scaffold_32	477801	477900	chrUn_28	0	0	24.3801	1	shore	0	GSONMT00077156001	CNTP2_MOUSE	Contactin-associated protein-like 2	0	.
scaffold_32	953501	953600	chrUn_28	0	0	20.1682	2	open sea	0	GSONMT00077176001	S12A7_RAT	Solute carrier family 12 member 7	9e-35	.
scaffold_32	1253701	1253800	chrUn_28	0	0	19.9368	5	open sea	.	.	.	.	.	ID=RM1301722;Name=RM1301722;Note=Motif:Gypsy-35_GA-I-int
scaffold_320	476301	476400	chrUn_8	0	0	19.8445	3	shore	.	.	.	.	.	ID=RM1302999;Name=RM1302999;Note=Motif:REX1-1_AFC
scaffold_320	829601	829700	chrUn_8	0	0	20.2922	3	shelf	4521	GSONMT00016174001	MGAT2_PIG	Alpha-1,6-mannosyl-glycoprotein 2-beta-N-acetylglucosaminyltransferase	0	.
scaffold_320	958101	958200	chrUn_8	0	0	23.4631	2	shore	-3957	GSONMT00016175001	MCATL_HUMAN	Mitochondrial basic amino acids transporter	2e-157	.
scaffold_32012	3401	3500	chrUn	0	0	20.0445	9	open sea	0	GSONMT00028871001	ADCY8_HUMAN	Adenylate cyclase type 8	8e-68	.
scaffold_32047	601	700	chrUn	0	0	37.675	4	open sea	.	.	.	.	.	.
scaffold_3217	66601	66700	chrUn	0	0	35.6074	4	shelf	.	.	.	.	.	.
scaffold_3217	66701	66800	chrUn	0	0	32.9432	5	shelf	.	.	.	.	.	.
scaffold_322	97301	97400	chrUn_27	0	0	19.997	7	open sea	0	GSONMT00028424001	ACTN4_PONAB	Alpha-actinin-4	0	.
scaffold_322	570601	570700	chrUn_27	0	0	-72.0834	7	shore	-833	GSONMT00028457001	HIP1_HUMAN	Huntingtin-interacting protein 1	0	.
scaffold_3221	69101	69200	chrUn	0	0	24.5012	3	open sea	.	.	.	.	.	.
scaffold_32223	3501	3600	chrUn	0	0	21.7893	5	open sea	.	.	.	.	.	ID=RM1307209;Name=RM1307209;Note=Motif:TC1_FR3
scaffold_32242	501	600	chrUn	0	0	31.9464	3	open sea	.	.	.	.	.	.
scaffold_323	36101	36200	chrUn_14	0	0	23.6458	4	open sea	8977	GSONMT00031153001	TC3A_CAEEL	Transposable element Tc3 transposase	1e-16	.
scaffold_323	154601	154700	chrUn_14	0	0	20.7963	2	open sea	7083	GSONMT00031158001	DAPK2_MOUSE	Death-associated protein kinase 2	2e-132	.
scaffold_3236	59701	59800	chrUn	0	0	21.0983	1	open sea	3735	GSONMT00015054001	.	.	.	.
scaffold_32389	3101	3200	chrUn	0	0	21.6899	2	open sea	.	.	.	.	.	.
scaffold_324	334101	334200	chrUn	0	0	22.7132	3	open sea	.	.	.	.	.	.
scaffold_324	709101	709200	chrUn	0	0	38.9539	7	open sea	0	GSONMT00022417001	GLT14_MOUSE	Polypeptide N-acetylgalactosaminyltransferase 14	3e-58	.
scaffold_32450	2801	2900	chrUn	0	0	24.5288	5	shore	0	GSONMT00056686001	DAG1_BOVIN	Dystroglycan	8e-136	.
scaffold_3249	10401	10500	chrUn	0	0	19.5047	3	open sea	.	.	.	.	.	ID=RM1311482;Name=RM1311482;Note=Motif:TZF28C
scaffold_325	61901	62000	chrUn_7	0	0	19.7379	8	shore	.	.	.	.	.	.
scaffold_325	903701	903800	chrUn_7	0	0	23.6164	4	shore	.	.	.	.	.	.
scaffold_32510	301	400	chrUn	0	0	19.6972	5	open sea	.	.	.	.	.	.
scaffold_3256	4101	4200	chrUn	0	0	63.8063	5	shore	0	GSONMT00036686001	OPN5_HUMAN	Opsin-5	1e-69	.
scaffold_3256	4201	4300	chrUn	0	0	20.8103	6	shore	0	GSONMT00036686001	OPN5_HUMAN	Opsin-5	1e-69	.
scaffold_32563	2801	2900	chrUn	0	0	56.9131	7	island	.	.	.	.	.	.
scaffold_32563	2901	3000	chrUn	0	0	48.727	4	island	.	.	.	.	.	.
scaffold_326	580501	580600	chr_28	0	0	24.2044	4	shore	.	.	.	.	.	.
scaffold_3264	47801	47900	chrUn	0	0	20.6679	1	shore	-8213	GSONMT00011335001	GOLP3_MOUSE	Golgi phosphoprotein 3	2e-164	.
scaffold_3268	55101	55200	chrUn	0	0	25.701	4	open sea	-8645	GSONMT00048804001	ASTN2_MOUSE	Astrotactin-2	7e-67	.
scaffold_327	128101	128200	chrUn_10	0	0	22.1617	4	shore	.	.	.	.	.	.
scaffold_32712	2501	2600	chrUn	0	0	-69.4783	7	island	0	GSONMT00044848001	DLX3B_DANRE	Homeobox protein Dlx3b	8e-146	.
scaffold_3272	44001	44100	chrUn_20	0	0	28.5977	3	open sea	.	.	.	.	.	.
scaffold_3272	44101	44200	chrUn_20	0	0	29.4676	4	open sea	.	.	.	.	.	.
scaffold_3274	29101	29200	chrUn	0	0	24.8577	7	shore	.	.	.	.	.	.
scaffold_3278	32601	32700	chrUn	0	0	20.3641	2	open sea	.	.	.	.	.	.
scaffold_328	728701	728800	chrUn_8	0	0	33.4998	3	open sea	.	.	.	.	.	.
scaffold_328	953901	954000	chrUn_8	0	0	21.7748	3	shore	.	.	.	.	.	.
scaffold_32866	501	600	chrUn	0	0	83.0315	6	island	0	GSONMT00004188001	KCNA1_ONCMY	Shaker-related potassium channel tsha2	0	.
scaffold_32866	601	700	chrUn	0	0	58.329	7	island	0	GSONMT00004188001	KCNA1_ONCMY	Shaker-related potassium channel tsha2	0	.
scaffold_32889	3601	3700	chrUn	0	0	22.3972	2	open sea	.	.	.	.	.	ID=RM1318673;Name=RM1318673;Note=Motif:Polinton-2_DR
scaffold_329	40001	40100	chrUn_9	0	0	30.8282	3	shore	0	GSONMT00061144001	SCRT2_MOUSE	Transcriptional repressor scratch 2	2e-96	.
scaffold_32909	2701	2800	chrUn	0	0	23.1274	1	open sea	.	.	.	.	.	.
scaffold_3298	66701	66800	chrUn	0	0	23.0976	5	shelf	-3575	GSONMT00063892001	MDGA2_MOUSE	MAM domain-containing glycosylphosphatidylinositol anchor protein 2	0	.
scaffold_33	927301	927400	chrUn_1	0	0	46.6181	1	open sea	.	.	.	.	.	.
scaffold_33	927401	927500	chrUn_1	0	0	29.2725	5	open sea	.	.	.	.	.	.
scaffold_33	1638501	1638600	chrUn_1	0	0	25.0305	1	open sea	9974	GSONMT00077282001	GALR2_HUMAN	Galanin receptor type 2	7e-16	.
scaffold_33	1688001	1688100	chrUn_1	0	0	21.2312	2	open sea	.	.	.	.	.	ID=RM1321679;Name=RM1321679;Note=Motif:CR1-1_DR
scaffold_33	2175401	2175500	chrUn_1	0	0	35.8097	6	island	0	GSONMT00077307001	MAP2_HUMAN	Methionine aminopeptidase 2	0	.
scaffold_33	2175501	2175600	chrUn_1	0	0	28.1377	5	island	0	GSONMT00077307001	MAP2_HUMAN	Methionine aminopeptidase 2	0	.
scaffold_33099	3001	3100	chrUn	0	0	28.6369	5	open sea	.	.	.	.	.	.
scaffold_331	671001	671100	chrUn_Sex	0	0	20.5979	3	open sea	.	.	.	.	.	.
scaffold_331	795701	795800	chrUn_Sex	0	0	29.078	3	shore	.	.	.	.	.	.
scaffold_3310	23801	23900	chrUn	0	0	21.0078	3	open sea	.	.	.	.	.	ID=RM1324682;Name=RM1324682;Note=Motif:OSSINE1
scaffold_3317	56301	56400	chrUn	0	0	31.6054	3	open sea	-838	GSONMT00055389001	MAST1_HUMAN	Microtubule-associated serine/threonine-protein kinase 1	0	.
scaffold_33171	1501	1600	chrUn	0	0	23.9262	5	open sea	.	.	.	.	.	.
scaffold_333	726701	726800	chrUn_18	0	0	27.2044	2	open sea	0	GSONMT00044437001	SSRB_BOVIN	Translocon-associated protein subunit beta	8e-116	.
scaffold_334	368501	368600	chrUn	0	0	33.7935	2	open sea	.	.	.	.	.	ID=RM1329365;Name=RM1329365;Note=Motif:CR1-40_DR
scaffold_334	565501	565600	chrUn	0	0	23.3831	3	open sea	0	GSONMT00050615001	DCDC2_MOUSE	Doublecortin domain-containing protein 2	2e-87	.
scaffold_334	687901	688000	chrUn	0	0	20.9672	2	shelf	0	GSONMT00050618001	MYO6_CHICK	Unconventional myosin-VI	0	.
scaffold_334	944501	944600	chrUn	0	0	22.8474	2	open sea	.	.	.	.	.	.
scaffold_3340	30101	30200	chrUn	0	0	23.7267	9	shore	-9227	GSONMT00031639001	TBA_NOTVI	Tubulin alpha chain	4e-69	.
scaffold_33424	2601	2700	chrUn	0	0	20.184	1	shore	.	.	.	.	.	ID=RM1330010;Name=RM1330010;Note=Motif:Ronin1_I-int
scaffold_3348	57901	58000	chrUn	0	0	26.7929	2	shore	7053	GSONMT00004712001	FOXA2_ORYLA	Hepatocyte nuclear factor 3-beta	4e-93	.
scaffold_33483	901	1000	chrUn	0	0	23.6448	3	shore	.	.	.	.	.	ID=RM1330591;Name=RM1330591;Note=Motif:Gypsy69-I_DR-int
scaffold_335	205401	205500	chrUn_6	0	0	43.5912	2	open sea	-7790	GSONMT00060157001	CRA1B_DANRE	Collagen alpha-1(XXVII) chain B	3e-107	.
scaffold_33502	1201	1300	chrUn	0	0	20.5375	5	island	.	.	.	.	.	ID=RM1331542;Name=RM1331542;Note=Motif:TC1_FR3
scaffold_3355	2801	2900	chrUn	0	0	23.3387	4	shelf	.	.	.	.	.	.
scaffold_33552	1301	1400	chrUn	0	0	25.1453	2	shore	.	.	.	.	.	.
scaffold_336	704301	704400	chrUn_5	0	0	21.1093	2	shelf	0	GSONMT00033376001	CAC1E_HUMAN	Voltage-dependent R-type calcium channel subunit alpha-1E	5e-40	.
scaffold_336	727301	727400	chrUn_5	0	0	23.1694	2	open sea	0	GSONMT00033378001	.	.	.	.
scaffold_3361	4201	4300	chrUn_12	0	0	20.2063	3	open sea	3220	GSONMT00043448001	FMNL_HUMAN	Formin-like protein 1	2e-180	.
scaffold_33632	2801	2900	chrUn	0	0	46.3514	6	open sea	.	.	.	.	.	.
scaffold_337	120101	120200	chrUn_29	0	0	25.5974	2	open sea	.	.	.	.	.	ID=RM1334223;Name=RM1334223;Note=Motif:Gypsy-10_GA-I-int
scaffold_337	665901	666000	chrUn_29	0	0	32.6472	2	open sea	.	.	.	.	.	.
scaffold_337	846601	846700	chrUn_29	0	0	19.7433	3	shore	.	.	.	.	.	ID=RM1334692;Name=RM1334692;Note=Motif:Gypsy69-I_DR-int
scaffold_3380	14301	14400	chrUn	0	0	32.8338	6	open sea	.	.	.	.	.	.
scaffold_3380	14401	14500	chrUn	0	0	50.216	3	open sea	.	.	.	.	.	.
scaffold_3381	38701	38800	chrUn	0	0	33.9049	1	shore	-899	GSONMT00036540001	OR1M1_HUMAN	Olfactory receptor 1M1	1e-25	.
scaffold_3381	38801	38900	chrUn	0	0	27.3055	3	shore	-999	GSONMT00036540001	OR1M1_HUMAN	Olfactory receptor 1M1	1e-25	.
scaffold_3386	62801	62900	chrUn	0	0	20.0818	2	shore	.	.	.	.	.	ID=RM1337155;Name=RM1337155;Note=Motif:Gypsy-10_GA-I-int
scaffold_33861	2301	2400	chrUn	0	0	22.2085	3	open sea	.	.	.	.	.	.
scaffold_3387	51201	51300	chrUn	0	0	24.1482	8	island	.	.	.	.	.	ID=RM1337242;Name=RM1337242;Note=Motif:Gypsy-168-I_DR-int
scaffold_3388	57301	57400	chrUn	0	0	19.5111	3	shore	.	.	.	.	.	.
scaffold_339	688101	688200	chrUn_29	0	0	26.9051	4	open sea	8503	GSONMT00039250001	RHOV_RAT	Rho-related GTP-binding protein RhoV	3e-76	.
scaffold_339	688201	688300	chrUn_29	0	0	48.5874	5	open sea	8603	GSONMT00039250001	RHOV_RAT	Rho-related GTP-binding protein RhoV	3e-76	.
scaffold_339	939501	939600	chrUn_29	0	0	30.088	3	open sea	-737	GSONMT00039264001	RAB15_BOVIN	Ras-related protein Rab-15	6e-113	.
scaffold_33995	301	400	chrUn	0	0	40.8116	1	open sea	.	.	.	.	.	.
scaffold_34	317601	317700	chrUn_14	0	0	19.8295	3	open sea	0	GSONMT00077325001	FA13B_HUMAN	Protein FAM13B	4e-155	.
scaffold_34	544101	544200	chrUn_14	0	0	20.6162	3	shore	.	.	.	.	.	.
scaffold_34	544201	544300	chrUn_14	0	0	26.5418	7	shore	.	.	.	.	.	.
scaffold_34	1112701	1112800	chrUn_14	0	0	21.392	3	shelf	.	.	.	.	.	ID=RM1339934;Name=RM1339934;Note=Motif:CR1-40_DR
scaffold_34	1959101	1959200	chrUn_14	0	0	32.1885	1	open sea	.	.	.	.	.	.
scaffold_340	19301	19400	chrUn	0	0	21.4063	1	open sea	1776	GSONMT00030962001	OSTN_HUMAN	Osteocrin	2e-18	.
scaffold_340	100201	100300	chrUn	0	0	22.6397	4	open sea	.	.	.	.	.	.
scaffold_340	342301	342400	chrUn	0	0	21.3245	2	shore	7442	GSONMT00030970001	.	.	.	.
scaffold_340	431301	431400	chrUn	0	0	20.9604	2	shore	9388	GSONMT00030978001	ABCG1_HUMAN	ATP-binding cassette sub-family G member 1	1e-34	.
scaffold_3400	25101	25200	chrUn	0	0	20.7329	5	shore	0	GSONMT00005851001	PDE5A_BOVIN	cGMP-specific 3',5'-cyclic phosphodiesterase	2e-57	.
scaffold_3406	63101	63200	chrUn	0	0	21.6352	3	open sea	-4269	GSONMT00026631001	S12A5_RAT	Solute carrier family 12 member 5	3e-31	.
scaffold_34066	2901	3000	chrUn	0	0	19.6142	3	open sea	.	.	.	.	.	.
scaffold_3408	3401	3500	chrUn	0	0	24.1713	3	open sea	-9015	GSONMT00042036001	AP3M1_CHICK	AP-3 complex subunit mu-1	0	.
scaffold_3408	3501	3600	chrUn	0	0	23.7813	5	open sea	-8915	GSONMT00042036001	AP3M1_CHICK	AP-3 complex subunit mu-1	0	.
scaffold_341	727901	728000	chrUn	0	0	28.0686	3	open sea	0	GSONMT00041031001	ADCY1_HUMAN	Adenylate cyclase type 1	2e-172	.
scaffold_342	439201	439300	chrUn_29	0	0	26.4622	2	open sea	.	.	.	.	.	.
scaffold_342	501001	501100	chrUn_29	0	0	34.3845	4	open sea	-9297	GSONMT00056660001	GLRA4_MOUSE	Glycine receptor subunit alpha-4	3e-159	.
scaffold_34200	1201	1300	chrUn	0	0	-50.7167	5	shelf	.	.	.	.	.	.
scaffold_34202	401	500	chrUn	0	0	22.9226	3	shore	.	.	.	.	.	.
scaffold_3428	41401	41500	chrUn_5	0	0	20.6323	3	island	6382	GSONMT00036050001	BRNP1_CHICK	BMP/retinoic acid-inducible neural-specific protein 1	3e-74	.
scaffold_343	205701	205800	chrUn_10	0	0	19.6638	3	open sea	0	GSONMT00039778001	FGFR4_DANRE	Fibroblast growth factor receptor 4	0	.
scaffold_343	754901	755000	chrUn_10	0	0	94.7395	2	open sea	-4234	GSONMT00039797001	CASP_HUMAN	Protein CASP	6e-55	.
scaffold_34322	2901	3000	chrUn	0	0	27.5732	1	shore	.	.	.	.	.	.
scaffold_34331	2601	2700	chrUn	0	0	40.1768	8	open sea	.	.	.	.	.	.
scaffold_34331	2801	2900	chrUn	0	0	41.7799	3	open sea	.	.	.	.	.	.
scaffold_3434	7801	7900	chrUn	0	0	-35.712	10	open sea	.	.	.	.	.	.
scaffold_3437	6001	6100	chrUn	0	0	24.6224	3	shore	.	.	.	.	.	.
scaffold_3437	54901	55000	chrUn	0	0	29.7895	4	shore	.	.	.	.	.	.
scaffold_3437	55001	55100	chrUn	0	0	20.1965	7	island	.	.	.	.	.	.
scaffold_34388	2101	2200	chrUn	0	0	21.4855	2	island	0	GSONMT00047469001	RN128_PONAB	E3 ubiquitin-protein ligase RNF128	3e-83	.
scaffold_3440	2601	2700	chrUn	0	0	32.0613	4	shore	.	.	.	.	.	.
scaffold_3447	19601	19700	chrUn	0	0	20.3202	7	island	.	.	.	.	.	.
scaffold_34493	1701	1800	chrUn	0	0	20.4987	3	open sea	.	.	.	.	.	.
scaffold_34493	1801	1900	chrUn	0	0	22.3656	2	open sea	.	.	.	.	.	.
scaffold_345	56301	56400	chrUn_Sex	0	0	24.1746	6	shelf	.	.	.	.	.	ID=RM1349559;Name=RM1349559;Note=Motif:Ronin1_I-int
scaffold_345	58701	58800	chrUn_Sex	0	0	21.3435	3	shore	.	.	.	.	.	.
scaffold_345	436501	436600	chrUn_Sex	0	0	20.2863	2	open sea	.	.	.	.	.	ID=RM1349785;Name=RM1349785;Note=Motif:REX1-1_AFC
scaffold_345	487201	487300	chrUn_Sex	0	0	20.4935	2	open sea	0	GSONMT00036943001	MMP17_HUMAN	Matrix metalloproteinase-17	0	.
scaffold_346	503701	503800	chrUn_10	0	0	28.5364	5	shore	.	.	.	.	.	ID=RM1351571;Name=RM1351571;Note=Motif:Ronin1_I-int
scaffold_346	505801	505900	chrUn_10	0	0	23.3669	2	shore	.	.	.	.	.	ID=RM1351573;Name=RM1351573;Note=Motif:Ronin1_I-int
scaffold_346	739101	739200	chrUn_10	0	0	28.2588	4	open sea	.	.	.	.	.	.
scaffold_34697	1001	1100	chrUn	0	0	22.5744	7	island	.	.	.	.	.	.
scaffold_347	603401	603500	chrUn_9	0	0	48.1114	3	open sea	0	GSONMT00015734001	SULF2_HUMAN	Extracellular sulfatase Sulf-2	0	.
scaffold_348	199701	199800	chrUn	0	0	88.9213	6	island	0	GSONMT00003606001	JCAD_HUMAN	Junctional protein associated with coronary artery disease	5e-30	.
scaffold_348	383001	383100	chrUn	0	0	22.081	3	shore	.	.	.	.	.	.
scaffold_349	922001	922100	chrUn_17	0	0	47.7352	4	shelf	.	.	.	.	.	.
scaffold_3497	49501	49600	chrUn_11	0	0	23.1068	1	open sea	.	.	.	.	.	ID=RM1357813;Name=RM1357813;Note=Motif:CR1-40_DR
scaffold_3498	38801	38900	chrUn	0	0	-21.1148	5	shore	9967	GSONMT00043456001	CDK12_HUMAN	Cyclin-dependent kinase 12	5e-51	.
scaffold_35	604501	604600	chrUn_23	0	0	19.8271	2	shore	7534	GSONMT00077399001	PCD15_CHICK	Protocadherin-15	2e-79	.
scaffold_35	1768301	1768400	chrUn_23	0	0	23.6705	6	open sea	.	.	.	.	.	.
scaffold_3509	50201	50300	chrUn	0	0	21.5137	2	shelf	.	.	.	.	.	.
scaffold_352	56301	56400	chr_11	0	0	19.9981	4	open sea	4505	GSONMT00030594001	VP13D_HUMAN	Vacuolar protein sorting-associated protein 13D	9e-18	.
scaffold_3522	37101	37200	chrUn_3	0	0	31.3823	7	shore	.	.	.	.	.	.
scaffold_3530	33201	33300	chrUn	0	0	22.4167	3	shore	.	.	.	.	.	.
scaffold_3537	34701	34800	chrUn	0	0	26.0336	2	open sea	.	.	.	.	.	.
scaffold_3537	34801	34900	chrUn	0	0	33.6709	7	open sea	.	.	.	.	.	.
scaffold_354	27901	28000	chrUn_3	0	0	21.0521	7	island	0	GSONMT00035324001	DOCK9_HUMAN	Dedicator of cytokinesis protein 9	6e-171	.
scaffold_35496	1901	2000	chrUn	0	0	20.7155	7	shore	.	.	.	.	.	.
scaffold_355	166301	166400	chrUn_4	0	0	28.5559	2	shore	.	.	.	.	.	.
scaffold_355	171701	171800	chrUn_4	0	0	35.3771	4	open sea	.	.	.	.	.	.
scaffold_355	410201	410300	chrUn_4	0	0	21.1904	8	open sea	0	GSONMT00025755001	LRRC7_BOVIN	Leucine-rich repeat-containing protein 7	0	.
scaffold_35514	2901	3000	chrUn	0	0	27.0158	2	shelf	.	.	.	.	.	ID=RM1369237;Name=RM1369237;Note=Motif:UnaL2
scaffold_3557	58001	58100	chrUn	0	0	24.4399	2	shelf	.	.	.	.	.	.
[truncated: 1,917 more rows]

## Sheet: S5.2 tDMRs hypo in sperm
scaffold	start	stop	Chr	pvalue	qvalue	meth.diff	CG_in_tile	island_annot	dist to closest gene	O.my gene ID	UniProt ID	UniProt Full Name	E-value	Repeat Description
scaffold_1053	240601	240700	chrUn	0	0	-75.2316	8	island	0	GSONMT00033334001	HXA3A_TAKRU	Homeobox protein Hox-A3a	0	.
scaffold_12	553201	553300	chrUn_4	0	0	-77.7547	5	island	0	GSONMT00065649001	ZN503_DANRE	Zinc finger protein 503	0	.
scaffold_12562	9601	9700	chrUn	0	0	-80.1604	5	shore	0	GSONMT00009527001	IRX3_XENTR	Iroquois-class homeodomain protein irx-3	4e-56	.
scaffold_13270	1701	1800	chrUn	0	0	-86.6634	8	island	.	.		.	.	.
scaffold_1344	227301	227400	chrUn_Sex	0	0	-85.0828	6	island	0	GSONMT00033437001	PO5F1_DANRE	POU domain, class 5, transcription factor 1	3e-175	.
scaffold_1344	227401	227500	chrUn_Sex	0	0	-87.6947	9	island	0	GSONMT00033437001	PO5F1_DANRE	POU domain, class 5, transcription factor 1	3e-175	.
scaffold_136	622301	622400	chrUn_20	0	0	-87.5085	7	island	-189	GSONMT00066870001	RPGF2_HUMAN	Rap guanine nucleotide exchange factor 2	0	.
scaffold_1611	142801	142900	chr_12	0	0	-95.1485	4	shelf	.	.		.	.	.
scaffold_1931	101701	101800	chrUn_9	0	0	-89.8148	7	island	0	GSONMT00019901001	ACINU_HUMAN	Apoptotic chromatin condensation inducer in the nucleus	2e-99	.
scaffold_1959	54401	54500	chrUn	0	0	-79.6399	2	open sea	0	GSONMT00011470001	HXA3A_TAKRU	Homeobox protein Hox-A3a	7e-174	.
scaffold_19768	1901	2000	chrUn	0	0	-74.6738	9	island	.	.		.	.	.
scaffold_2039	129601	129700	chrUn	0	0	-82.3143	6	shore	.	.		.	.	.
scaffold_225	223701	223800	chrUn_19	0	0	-87.9373	8	island	.	.		.	.	.
scaffold_244	217501	217600	chrUn_12	0	0	-87.0553	6	island	0	GSONMT00073495001	HXB1_CYPCA	Homeobox protein Hox-B1	3e-138	.
scaffold_244	217601	217700	chrUn_12	0	0	-79.9214	8	shore	0	GSONMT00073495001	HXB1_CYPCA	Homeobox protein Hox-B1	3e-138	.
scaffold_244	242701	242800	chrUn_12	0	0	-81.1772	4	shore	0	GSONMT00073496001	HXB3A_DANRE	Homeobox protein Hox-B3a	0	.
scaffold_244	242801	242900	chrUn_12	0	0	-85.0114	8	island	0	GSONMT00073496001	HXB3A_DANRE	Homeobox protein Hox-B3a	0	.
scaffold_26769	1601	1700	chrUn	0	0	-78.206	6	island	0	GSONMT00033075001		.	.	.
scaffold_28200	2001	2100	chrUn	0	0	-75.1142	9	island	.	.		.	.	.
scaffold_29430	2401	2500	chrUn	0	0	-81.6802	6	open sea	.	.		.	.	.
scaffold_299	683001	683100	chrUn_8	0	0	-80.2944	8	open sea	0	GSONMT00076538001		.	.	.
scaffold_3179	12001	12100	chrUn	0	0	-79.1155	5	shore	0	GSONMT00038401001	ZAR1_XENLA	Zygote arrest protein 1	2e-86	.
scaffold_3724	18701	18800	chrUn	0	0	-74.8377	9	island	0	GSONMT00033304001	BMP15_SHEEP	Bone morphogenetic protein 15	3e-38	.
scaffold_429	527501	527600	chrUn_2	0	0	-86.8977	10	open sea	263	GSONMT00054113001	PAF15_XENLA	PCNA-associated factor	3e-31	.
scaffold_477	87001	87100	chrUn_20	0	0	-85.0392	5	shore	0	GSONMT00023217001	KCTD5_RAT	BTB/POZ domain-containing protein KCTD5	7e-126	.
scaffold_4948	30501	30600	chrUn	0	0	-77.3894	5	island	.	.		.	.	.
scaffold_6333	4801	4900	chrUn	0	0	-86.691	3	shore	0	GSONMT00004484001	SKDA1_HUMAN	SKI/DACH domain-containing protein 1	5e-69	.
scaffold_673	514701	514800	chrUn	0	0	-87.2138	5	island	0	GSONMT00052579001	HXB3A_DANRE	Homeobox protein Hox-B3a	0	.
scaffold_684	71001	71100	chrUn_10	0	0	-88.0368	9	island	1921	GSONMT00058265001		.	.	.
scaffold_684	71101	71200	chrUn_10	0	0	-87.129	10	island	2021	GSONMT00058265001		.	.	.
scaffold_71326	601	700	chrUn_3	0	0	-75.9154	4	open sea	0	GSONMT00054294001	HXA2B_DANRE	Homeobox protein Hox-A2b	2e-162	.
scaffold_793	18001	18100	chrUn_4	0	0	-75.5026	6	island	0	GSONMT00011735001	FOXE4_XENLA	Forkhead box protein E4	2e-94	.
scaffold_79929	505701	505800	chrUn	0	0	-84.8332	7	shelf	.	.		.	.	.

## Sheet: S5.3 tDMRs hyper in sperm
scaffold	start	stop	Chr	pvalue	qvalue	meth.diff	CG_in_tile	island_annot	dist to closest gene	O.my gene ID	UniProt ID	UniProt Full Name	E-value	Repeat Description
scaffold_1	3782901	3783000	chrUn_26	0	0	75.6862	4	shelf	0	GSONMT00064146001	CAD11_CHICK	Cadherin-11	0	.
scaffold_10342	3201	3300	chrUn	0	0	90.2735	4	shore	.	.	.	.	.	.
scaffold_106	1517901	1518000	chrUn_17	0	0	75.3652	2	open sea	.	.	.	.	.	.
scaffold_10669	17901	18000	chrUn	0	0	87.0324	2	shore	.	.	.	.	.	.
scaffold_1102	216101	216200	chrUn_28	0	0	78.9272	4	open sea	0	GSONMT00038525001	PARD3_HUMAN	Partitioning defective 3 homolog	0	.
scaffold_1108	240001	240100	chrUn	0	0	84.619	2	open sea	0	GSONMT00047023001	KAZRN_HUMAN	Kazrin	7e-106	.
scaffold_1108	240101	240200	chrUn	0	0	93.169	3	open sea	0	GSONMT00047023001	KAZRN_HUMAN	Kazrin	7e-106	.
scaffold_111	239701	239800	chrUn_13	0	0	85.3028	3	island	0	GSONMT00065073001	IF4A3_XENTR	Eukaryotic initiation factor 4A-III	3e-179	.
scaffold_1129	77601	77700	chrUn_5	0	0	75.4834	7	open sea	0	GSONMT00015092001	RGS3_MOUSE	Regulator of G-protein signaling 3	1e-34	.
scaffold_1129	77701	77800	chrUn_5	0	0	88.8516	3	open sea	-20	GSONMT00015092001	RGS3_MOUSE	Regulator of G-protein signaling 3	1e-34	.
scaffold_11459	6501	6600	chrUn	0	0	89.3184	3	open sea	.	.	.	.	.	.
scaffold_11470	1001	1100	chrUn_16	0	0	96.464	2	open sea	0	GSONMT00025226001	CG062_RAT	Uncharacterized protein C7orf62 homolog	4e-29	.
scaffold_118	128401	128500	chr_1	0	0	86.2052	4	open sea	-2444	GSONMT00065515001	NB5R2_DANRE	NADH-cytochrome b5 reductase 2	9e-161	.
scaffold_118	1085901	1086000	chr_1	0	0	86.5122	4	island	.	.	.	.	.	.
scaffold_118	1537401	1537500	chr_1	0	0	92.2723	1	open sea	0	GSONMT00065583001	FGD4_HUMAN	FYVE, RhoGEF and PH domain-containing protein 4	2e-150	.
scaffold_118	1537501	1537600	chr_1	0	0	82.3189	2	open sea	0	GSONMT00065583001	FGD4_HUMAN	FYVE, RhoGEF and PH domain-containing protein 4	2e-150	.
scaffold_1196	120501	120600	chrUn	0	0	80.8243	2	open sea	.	.	.	.	.	ID=RM694120;Name=RM694120;Note=Motif:CR1-31_DR
scaffold_1214	21001	21100	chrUn_2	0	0	89.6256	2	open sea	.	.	.	.	.	.
scaffold_1238	167601	167700	chrUn	0	0	78.892	8	island	0	GSONMT00008754001	WNT8B_DANRE	Protein Wnt-8b	0	.
scaffold_12480	7801	7900	chrUn	0	0	90.7243	4	shelf	-619	GSONMT00057569001	OPA3_DANRE	Optic atrophy 3 protein homolog	4e-23	.
scaffold_126	22601	22700	chr_17	0	0	98.1331	5	open sea	0	GSONMT00066180001	AQP7_HUMAN	Aquaporin-7	1e-54	.
scaffold_126	22801	22900	chr_17	0	0	96.5381	7	open sea	0	GSONMT00066180001	AQP7_HUMAN	Aquaporin-7	1e-54	.
scaffold_126	22901	23000	chr_17	0	0	97.6122	5	open sea	0	GSONMT00066180001	AQP7_HUMAN	Aquaporin-7	1e-54	.
scaffold_130	290101	290200	chrUn_17	0	0	92.3972	4	open sea	.	.	.	.	.	.
scaffold_1302	213401	213500	chrUn	0	0	81.0532	3	open sea	.	.	.	.	.	.
scaffold_131	33301	33400	chrUn_23	0	0	96.1983	5	shelf	0	GSONMT00066584001	MARH5_CHICK	E3 ubiquitin-protein ligase MARCH5	5e-50	.
scaffold_1338	28401	28500	chrUn	0	0	93.6999	3	open sea	0	GSONMT00003150001	PKP4_HUMAN	Plakophilin-4	0	.
scaffold_1338	81801	81900	chrUn	0	0	93.1215	4	open sea	0	GSONMT00003153001	PKP4_HUMAN	Plakophilin-4	4e-24	.
scaffold_134	655001	655100	chrUn_8	0	0	80.6535	5	open sea	.	.	.	.	.	.
scaffold_1348	86401	86500	chrUn	0	0	94.2182	2	open sea	-5730	GSONMT00009608001	ETV4_DANRE	ETS translocation variant 4	0	.
scaffold_1367	120001	120100	chrUn_16	0	0	76.9551	5	shelf	0	GSONMT00001894001	CNRP1_HUMAN	CB1 cannabinoid receptor-interacting protein 1	2e-71	.
scaffold_1392	226901	227000	chrUn_14	0	0	74.7072	2	open sea	0	GSONMT00047363001	JARD2_MOUSE	Protein Jumonji	0	.
scaffold_13983	6501	6600	chrUn	0	0	97.367	5	open sea	.	.	.	.	.	.
scaffold_14	239701	239800	chrUn_24	0	0	95.0837	4	open sea	0	GSONMT00067054001	RELB_MOUSE	Transcription factor RelB	3e-113	.
scaffold_14332	9301	9400	chrUn	0	0	92.5511	3	open sea	0	GSONMT00013756001	ZBTB5_HUMAN	Zinc finger and BTB domain-containing protein 5	2e-60	.
scaffold_14737	11301	11400	chrUn	0	0	78.1109	2	open sea	.	.	.	.	.	.
scaffold_14898	1801	1900	chrUn	0	0	80.2548	5	open sea	.	.	.	.	.	.
scaffold_15	819401	819500	chrUn_22	0	0	83.651	4	open sea	0	GSONMT00067736001	IBP5_MOUSE	Insulin-like growth factor-binding protein 5	1e-94	.
scaffold_1527	12201	12300	chrUn	0	0	94.241	5	open sea	.	.	.	.	.	.
scaffold_1527	12301	12400	chrUn	0	0	87.8534	7	open sea	.	.	.	.	.	.
scaffold_153	974401	974500	chrUn_24	0	0	87.8297	6	shore	0	GSONMT00068036001	LTBP2_MOUSE	Latent-transforming growth factor beta-binding protein 2	3e-92	.
scaffold_1538	123201	123300	chrUn	0	0	76.0735	3	shelf	.	.	.	.	.	.
scaffold_1538	123301	123400	chrUn	0	0	79.253	3	shelf	.	.	.	.	.	.
scaffold_1635	15001	15100	chrUn	0	0	78.1423	8	island	-6897	GSONMT00025665001	KDM6B_MOUSE	Lysine-specific demethylase 6B	0	.
scaffold_1690	5901	6000	chrUn	0	0	79.0334	3	shore	.	.	.	.	.	.
scaffold_1690	6001	6100	chrUn	0	0	95.985	3	shore	.	.	.	.	.	.
scaffold_174	1337101	1337200	chrUn_Sex	0	0	95.0113	3	open sea	0	GSONMT00069221001	MKL1_HUMAN	MKL/myocardin-like protein 1	3e-66	.
scaffold_175	543701	543800	chrUn_8	0	0	94.8047	4	open sea	.	.	.	.	.	.
scaffold_18	2397201	2397300	chrUn_3	0	0	78.1801	5	shore	.	.	.	.	.	.
scaffold_18132	501	600	chrUn	0	0	84.5952	7	open sea	.	.	.	.	.	.
scaffold_184	383101	383200	chrUn_1	0	0	83.235	1	shelf	.	.	.	.	.	.
scaffold_184	1161301	1161400	chrUn_1	0	0	85.1284	1	open sea	-2478	GSONMT00069891001	TMEM5_DANRE	Transmembrane protein 5	0	.
scaffold_18642	4201	4300	chrUn	0	0	95.0461	3	open sea	.	.	.	.	.	.
scaffold_1875	27201	27300	chrUn	0	0	95.0212	3	shore	-415	GSONMT00030476001	ZN330_HUMAN	Zinc finger protein 330	3e-137	.
scaffold_1905	65601	65700	chrUn_4	0	0	91.9927	4	shore	0	GSONMT00028065001	TM125_MOUSE	Transmembrane protein 125	5e-14	.
scaffold_1905	65701	65800	chrUn_4	0	0	89.0048	4	shore	0	GSONMT00028065001	TM125_MOUSE	Transmembrane protein 125	5e-14	.
scaffold_193	878101	878200	chrUn_17	0	0	89.606	7	shelf	0	GSONMT00070454001	DDX5_HUMAN	Probable ATP-dependent RNA helicase DDX5	0	.
scaffold_1960	98701	98800	chrUn	0	0	81.5349	4	open sea	0	GSONMT00034704001	KCNH3_MOUSE	Potassium voltage-gated channel subfamily H member 3	1e-167	.
scaffold_20	978401	978500	chrUn_11	0	0	91.2645	5	shore	.	.	.	.	.	.
scaffold_20	978501	978600	chrUn_11	0	0	89.1284	4	shore	.	.	.	.	.	.
scaffold_202	504601	504700	chrUn_8	0	0	85.0229	4	open sea	0	GSONMT00071136001	LAMA4_HUMAN	Laminin subunit alpha-4	0	.
scaffold_2025	26501	26600	chrUn_3	0	0	80.1935	4	open sea	0	GSONMT00007921001	CBL_MOUSE	E3 ubiquitin-protein ligase CBL	0	.
scaffold_209	552601	552700	chrUn_12	0	0	87.4154	5	open sea	.	.	.	.	.	.
scaffold_21125	301	400	chrUn	0	0	94.3815	2	open sea	.	.	.	.	.	.
scaffold_213	312001	312100	chrUn_7	0	0	91.3345	2	open sea	0	GSONMT00071816001	.	.	.	.
scaffold_223	1066001	1066100	chrUn_5	0	0	87.1712	3	open sea	.	.	.	.	.	.
scaffold_223	1183701	1183800	chrUn_5	0	0	96.139	5	shore	0	GSONMT00072432001	RBG1L_PONAB	Rab GTPase-activating protein 1-like	3e-62	.
scaffold_223	1183801	1183900	chrUn_5	0	0	96.3905	5	island	0	GSONMT00072432001	RBG1L_PONAB	Rab GTPase-activating protein 1-like	3e-62	.
scaffold_223	1183901	1184000	chrUn_5	0	0	90.6689	7	island	0	GSONMT00072432001	RBG1L_PONAB	Rab GTPase-activating protein 1-like	3e-62	.
scaffold_224	67901	68000	chrUn_21	0	0	89.8458	2	open sea	612	GSONMT00072440001	MCH2_ONCKE	Pro-MCH 2	6e-15	.
scaffold_23	1030701	1030800	chrUn_Sex	0	0	85.3449	7	island	0	GSONMT00072765001	AIF1L_MOUSE	Allograft inflammatory factor 1-like	1e-60	.
scaffold_23	1030801	1030900	chrUn_Sex	0	0	90.5479	6	island	0	GSONMT00072765001	AIF1L_MOUSE	Allograft inflammatory factor 1-like	1e-60	.
scaffold_23	1475201	1475300	chrUn_Sex	0	0	95.2165	5	open sea	0	GSONMT00072784001	FNBP1_XENLA	Formin-binding protein 1 homolog	5e-106	.
scaffold_23419	4701	4800	chrUn	0	0	91.7081	3	open sea	.	.	.	.	.	.
scaffold_23419	4801	4900	chrUn	0	0	90.49	3	open sea	.	.	.	.	.	.
scaffold_23486	3801	3900	chrUn	0	0	81.3526	3	open sea	.	.	.	.	.	.
scaffold_2392	72801	72900	chrUn	0	0	95.095	3	open sea	0	GSONMT00023016001	.	.	.	.
scaffold_24	1723501	1723600	chr_17	0	0	89.2723	5	shelf	0	GSONMT00073328001	TRAF5_MOUSE	TNF receptor-associated factor 5	5e-104	.
scaffold_25712	5101	5200	chrUn	0	0	91.6745	4	open sea	.	.	.	.	.	.
scaffold_2638	801	900	chrUn	0	0	83.3526	5	island	0	GSONMT00040037001	CEGTB_XENLA	Ceramide glucosyltransferase-B	3e-33	.
scaffold_265	999301	999400	chrUn_27	0	0	79.4415	6	shelf	5017	GSONMT00074882001	DLLC_DANRE	Delta-like protein C	0	.
scaffold_26727	3401	3500	chrUn	0	0	86.3493	6	open sea	.	.	.	.	.	.
scaffold_26862	3201	3300	chrUn	0	0	85.5354	5	open sea	.	.	.	.	.	.
scaffold_2738	59501	59600	chrUn_3	0	0	90.9571	5	open sea	.	.	.	.	.	.
scaffold_2774	22301	22400	chrUn	0	0	80.068	4	open sea	0	GSONMT00033850001	RARAB_DANRE	Retinoic acid receptor alpha-B	1e-28	.
scaffold_2774	22801	22900	chrUn	0	0	95.0263	4	open sea	0	GSONMT00033850001	RARAB_DANRE	Retinoic acid receptor alpha-B	1e-28	.
scaffold_280	115901	116000	chr_19	0	0	90.7646	2	open sea	-377	GSONMT00075755001	TM260_MOUSE	Transmembrane protein 260	0	.
scaffold_2804	55801	55900	chrUn_28	0	0	96.3598	7	open sea	0	GSONMT00048512001	ANGL4_PIG	Angiopoietin-related protein 4	6e-104	.
scaffold_2804	55901	56000	chrUn_28	0	0	87.7123	2	open sea	0	GSONMT00048512001	ANGL4_PIG	Angiopoietin-related protein 4	6e-104	.
scaffold_284	1006501	1006600	chrUn_16	0	0	82.4804	4	open sea	.	.	.	.	.	.
scaffold_2846	39501	39600	chrUn	0	0	88.9854	4	open sea	0	GSONMT00049809001	RARGA_DANRE	Retinoic acid receptor gamma-A	8e-165	.
scaffold_294	176101	176200	chrUn_11	0	0	93.2732	5	island	.	.	.	.	.	.
scaffold_294	176201	176300	chrUn_11	0	0	96.9365	5	island	.	.	.	.	.	.
scaffold_29586	2401	2500	chrUn	0	0	93.3342	3	open sea	.	.	.	.	.	ID=RM1248784;Name=RM1248784;Note=Motif:hAT-2n1_DR
scaffold_298	223901	224000	chrUn_4	0	0	76.9186	3	shore	0	GSONMT00076496001	FYN_XIPHE	Tyrosine-protein kinase Fyn	0	.
scaffold_3	483101	483200	chr_19	0	0	80.7748	3	open sea	.	.	.	.	.	.
scaffold_308	235901	236000	chrUn_9	0	0	74.9365	5	open sea	0	GSONMT00000770001	GP125_HUMAN	Probable G-protein coupled receptor 125	0	.
scaffold_3163	38501	38600	chrUn	0	0	79.2575	8	shelf	.	.	.	.	.	.
scaffold_32866	501	600	chrUn	0	0	83.0315	6	island	0	GSONMT00004188001	KCNA1_ONCMY	Shaker-related potassium channel tsha2	0	.
scaffold_343	754901	755000	chrUn_10	0	0	94.7395	2	open sea	-4234	GSONMT00039797001	CASP_HUMAN	Protein CASP	6e-55	.
scaffold_348	199701	199800	chrUn	0	0	88.9213	6	island	0	GSONMT00003606001	JCAD_HUMAN	Junctional protein associated with coronary artery disease	5e-30	.
scaffold_356	307101	307200	chrUn_21	0	0	87.3299	4	open sea	3798	GSONMT00018301001	.	.	.	.
scaffold_36091	1701	1800	chrUn	0	0	86.4423	4	open sea	.	.	.	.	.	.
scaffold_36091	1801	1900	chrUn	0	0	88.1808	10	open sea	.	.	.	.	.	ID=RM1379877;Name=RM1379877;Note=Motif:U17
scaffold_3620	16901	17000	chrUn	0	0	90.9896	3	open sea	0	GSONMT00034484001	PHAR2_HUMAN	Phosphatase and actin regulator 2	3e-73	.
scaffold_3759	37901	38000	chrUn_18	0	0	81.5329	5	open sea	0	GSONMT00030741001	MYLIA_DANRE	E3 ubiquitin-protein ligase MYLIP-A	4e-97	.
scaffold_38659	2501	2600	chrUn	0	0	86.5362	4	shore	.	.	.	.	.	.
scaffold_390	705201	705300	chrUn_18	0	0	86.2305	5	shore	0	GSONMT00062562001	CYSP2_HOMAM	Digestive cysteine proteinase 2	4e-68	.
scaffold_39212	2601	2700	chrUn	0	0	87.3529	4	shore	.	.	.	.	.	.
scaffold_394	755901	756000	chrUn	0	0	88.8048	7	shore	.	.	.	.	.	.
scaffold_4	2200101	2200200	chr_8	0	0	91.8796	1	open sea	.	.	.	.	.	.
scaffold_40	873801	873900	chrUn	0	0	97.3686	2	open sea	.	.	.	.	.	.
scaffold_409	60601	60700	chr_12	0	0	86.8675	6	shore	-3729	GSONMT00020068001	RPGF6_HUMAN	Rap guanine nucleotide exchange factor 6	0	.
scaffold_41239	1501	1600	chrUn	0	0	95.3017	3	open sea	.	.	.	.	.	.
scaffold_419	816201	816300	chrUn_19	0	0	76.7738	3	open sea	-6861	GSONMT00033865001	KCNJ5_PIG	G protein-activated inward rectifier potassium channel 4	3e-177	.
scaffold_4191	41501	41600	chrUn	0	0	94.6362	5	open sea	.	.	.	.	.	.
scaffold_43	1985601	1985700	chrUn_10	0	0	92.1868	4	open sea	7088	GSONMT00078213001	FX1AA_DANRE	Forkhead box protein O1-A	8e-38	.
scaffold_433	281701	281800	chrUn_16	0	0	89.7004	3	shore	.	.	.	.	.	.
scaffold_43686	1001	1100	chrUn	0	0	79.4697	3	open sea	.	.	.	.	.	.
scaffold_437	153801	153900	chrUn_23	0	0	77.8157	3	open sea	.	.	.	.	.	.
scaffold_437	200001	200100	chrUn_23	0	0	95.8863	3	open sea	0	GSONMT00008149001	SPTB2_HUMAN	Spectrin beta chain, non-erythrocytic 1	0	.
scaffold_437	200101	200200	chrUn_23	0	0	96.4483	5	open sea	0	GSONMT00008149001	SPTB2_HUMAN	Spectrin beta chain, non-erythrocytic 1	0	.
scaffold_44	1137001	1137100	chrUn_5	0	0	94.0372	9	open sea	.	.	.	.	.	.
scaffold_44	1137101	1137200	chrUn_5	0	0	90.9257	7	open sea	.	.	.	.	.	.
scaffold_440	190201	190300	chrUn_6	0	0	96.1795	8	island	.	.	.	.	.	.
scaffold_4422	41901	42000	chrUn	0	0	87.1774	11	open sea	.	.	.	.	.	.
scaffold_445	637501	637600	chrUn_8	0	0	91.8946	8	open sea	0	GSONMT00008987001	ANGL4_PIG	Angiopoietin-related protein 4	2e-101	.
scaffold_445	637601	637700	chrUn_8	0	0	93.2625	2	open sea	0	GSONMT00008987001	ANGL4_PIG	Angiopoietin-related protein 4	2e-101	.
scaffold_445	637701	637800	chrUn_8	0	0	95.3435	7	open sea	0	GSONMT00008987001	ANGL4_PIG	Angiopoietin-related protein 4	2e-101	.
scaffold_45	1565101	1565200	chrUn_16	0	0	86.5023	8	open sea	.	.	.	.	.	.
scaffold_4501	32901	33000	chrUn	0	0	95.265	4	shore	.	.	.	.	.	.
scaffold_47423	301	400	chrUn	0	0	92.6425	6	open sea	.	.	.	.	.	.
scaffold_4803	37601	37700	chrUn	0	0	81.9811	5	island	0	GSONMT00025146001	ABL1_HUMAN	Tyrosine-protein kinase ABL1	0	.
scaffold_489	5301	5400	chrUn_29	0	0	85.9618	5	island	0	GSONMT00055109001	CRIM1_CHICK	Cysteine-rich motor neuron 1 protein	2e-148	.
scaffold_490	560701	560800	chrUn	0	0	83.9775	3	open sea	-5597	GSONMT00025345001	RHG40_HUMAN	Rho GTPase-activating protein 40	1e-154	.
scaffold_492	510201	510300	chrUn_17	0	0	85.532	9	open sea	0	GSONMT00051799001	F212A_MOUSE	Protein FAM212A	8e-31	.
scaffold_56259	2001	2100	chrUn	0	0	83.4181	2	open sea	.	.	.	.	.	.
scaffold_567	406101	406200	chr_2	0	0	93.0353	3	island	0	GSONMT00063148001	TMOD4_BOVIN	Tropomodulin-4	5e-146	.
scaffold_568	261001	261100	chrUn_2	0	0	89.3416	5	shelf	0	GSONMT00058500001	AKP13_HUMAN	A-kinase anchor protein 13	2e-56	.
scaffold_578	240801	240900	chrUn	0	0	96.0106	3	open sea	-8294	GSONMT00034070001	I2B2B_DANRE	Interferon regulatory factor 2-binding protein 2-B	0	.
scaffold_58	503801	503900	chrUn_28	0	0	77.3732	6	open sea	.	.	.	.	.	.
scaffold_58	781201	781300	chrUn_28	0	0	81.4697	3	shore	.	.	.	.	.	.
scaffold_6010	31301	31400	chrUn	0	0	87.3982	5	open sea	0	GSONMT00001924001	SVIL_HUMAN	Supervillin	6e-131	.
scaffold_602	466101	466200	chrUn_14	0	0	86.2965	5	shore	.	.	.	.	.	.
scaffold_618	336201	336300	chrUn_5	0	0	94.9241	3	shore	0	GSONMT00018109001	RGS1_HORSE	Regulator of G-protein signaling 1	4e-51	.
scaffold_62645	601	700	chrUn	0	0	81.3006	7	open sea	.	.	.	.	.	.
scaffold_62645	701	800	chrUn	0	0	82.488	4	open sea	.	.	.	.	.	.
scaffold_63521	2001	2100	chrUn	0	0	90.0962	3	open sea	.	.	.	.	.	.
scaffold_63749	2101	2200	chrUn	0	0	86.5077	7	island	.	.	.	.	.	.
scaffold_645	568501	568600	chrUn_10	0	0	75.3891	1	open sea	.	.	.	.	.	.
scaffold_649	494101	494200	chrUn_20	0	0	77.4799	2	open sea	-5187	GSONMT00021314001	TCB2_CAEBR	Transposable element Tcb2 transposase	1e-15	.
scaffold_650	18801	18900	chrUn_15	0	0	83.3692	2	open sea	.	.	.	.	.	.
scaffold_659	573401	573500	chrUn_13	0	0	88.9918	5	shore	.	.	.	.	.	.
scaffold_662	90701	90800	chrUn_10	0	0	84.3938	3	open sea	0	GSONMT00007837001	MYPR_ONCMY	Myelin proteolipid protein	6e-140	.
scaffold_6626	18101	18200	chrUn	0	0	91.8503	6	open sea	.	.	.	.	.	.
scaffold_680	552401	552500	chrUn_7	0	0	96.5714	6	shelf	0	GSONMT00026691001	NR1D2_MOUSE	Nuclear receptor subfamily 1 group D member 2	8e-129	.
scaffold_6800	32101	32200	chrUn	0	0	76.3983	3	open sea	0	GSONMT00024117001	IKZF5_DANRE	Zinc finger protein Pegasus	4e-177	.
scaffold_68600	1601	1700	chrUn	0	0	94.6302	7	open sea	.	.	.	.	.	.
scaffold_69781	1701	1800	chrUn	0	0	84.1887	4	open sea	.	.	.	.	.	.
scaffold_706	21701	21800	chrUn_4	0	0	82.1274	4	open sea	5767	GSONMT00020670001	NUAK1_HUMAN	NUAK family SNF1-like kinase 1	2e-63	.
scaffold_713	503801	503900	chrUn_16	0	0	96.8539	3	open sea	.	.	.	.	.	.
scaffold_74752	1001	1100	chrUn	0	0	97.519	3	open sea	.	.	.	.	.	.
scaffold_75	138401	138500	chrUn_17	0	0	95.5837	10	open sea	0	GSONMT00081034001	K1C18_DANRE	Keratin, type I cytoskeletal 18	2e-139	.
scaffold_75	1822101	1822200	chrUn_17	0	0	83.3947	5	open sea	.	.	.	.	.	.
scaffold_759	275301	275400	chrUn_27	0	0	77.6045	3	shelf	0	GSONMT00000390001	ABCG4_HUMAN	ATP-binding cassette sub-family G member 4	0	.
scaffold_76004	801	900	chrUn	0	0	78.0729	4	open sea	.	.	.	.	.	.
scaffold_766	468001	468100	chrUn_15	0	0	85.8093	7	open sea	0	GSONMT00035205001	KPCT_MOUSE	Protein kinase C theta type	2e-145	.
scaffold_796	456801	456900	chrUn_28	0	0	76.96	7	shelf	0	GSONMT00048922001	P85B_RAT	Phosphatidylinositol 3-kinase regulatory subunit beta	0	.
scaffold_8080	22101	22200	chrUn	0	0	76.4143	1	open sea	0	GSONMT00003452001	HIPK3_HUMAN	Homeodomain-interacting protein kinase 3	6e-164	.
scaffold_8253	13001	13100	chrUn	0	0	92.9351	4	shore	1800	GSONMT00062001001	GNA13_HUMAN	Guanine nucleotide-binding protein subunit alpha-13	2e-46	.
scaffold_8253	13101	13200	chrUn	0	0	87.4683	7	island	1900	GSONMT00062001001	GNA13_HUMAN	Guanine nucleotide-binding protein subunit alpha-13	2e-46	.
scaffold_83	171401	171500	chrUn_17	0	0	95.001	3	open sea	-4707	GSONMT00081712001	FBLI1_MOUSE	Filamin-binding LIM protein 1	3e-73	.
scaffold_844	336301	336400	chrUn	0	0	94.4865	5	island	0	GSONMT00019730001	PRDM1_MOUSE	PR domain zinc finger protein 1	3e-84	.
scaffold_846	111201	111300	chrUn_5	0	0	82.6641	3	open sea	.	.	.	.	.	.
scaffold_8503	2301	2400	chrUn	0	0	96.6383	7	shore	.	.	.	.	.	.
scaffold_8503	2401	2500	chrUn	0	0	95.7787	3	shore	.	.	.	.	.	.
scaffold_861	401701	401800	chrUn_4	0	0	74.6555	3	shore	.	.	.	.	.	.
scaffold_87	386601	386700	chrUn_7	0	0	96.2225	6	shelf	0	GSONMT00081950001	ATX7_HUMAN	Ataxin-7	3e-140	.
scaffold_913	276601	276700	chrUn_29	0	0	80.9649	5	open sea	0	GSONMT00031752001	KPCD3_HUMAN	Serine/threonine-protein kinase D3	2e-151	.
scaffold_916	6001	6100	chrUn_12	0	0	93.8419	2	open sea	3762	GSONMT00015296001	QRIC2_HUMAN	Glutamine-rich protein 2	2e-46	.
scaffold_937	98301	98400	chrUn_4	0	0	77.2939	3	shelf	.	.	.	.	.	ID=RM2092325;Name=RM2092325;Note=Motif:REX1-1_AFC
scaffold_94	264801	264900	chrUn_17	0	0	77.2754	3	open sea	6133	GSONMT00082463001	CHM4B_DANRE	Charged multivesicular body protein 4b	1e-78	.
scaffold_9678	19801	19900	chrUn_2	0	0	90.2618	4	open sea	-3535	GSONMT00041721001	PHR4B_DANRE	Phosphatase and actin regulator 4B	1e-67	.
scaffold_969	129601	129700	chrUn	0	0	84.0654	6	shore	0	GSONMT00026236001	FRYL_HUMAN	Protein furry homolog-like	0	.
scaffold_9756	11601	11700	chrUn	0	0	93.4514	6	open sea	.	.	.	.	.	.
scaffold_9849	13301	13400	chrUn	0	0	96.9634	4	open sea	.	.	.	.	.	.
scaffold_989	286901	287000	chrUn_5	0	0	98.6848	4	shelf	-9601	GSONMT00006168001	MEGF9_HUMAN	Multiple epidermal growth factor-like domains protein 9	1e-54	.
scaffold_989	287001	287100	chrUn_5	0	0	98.1694	2	shelf	-9501	GSONMT00006168001	MEGF9_HUMAN	Multiple epidermal growth factor-like domains protein 9	1e-54	.
scaffold_99	707101	707200	chrUn_5	0	0	84.9066	2	shore	-5469	GSONMT00082768001	.	.	.	.
scaffold_999	360201	360300	chrUn	0	0	89.6833	4	open sea	-421	GSONMT00053637001	TRI39_RAT	E3 ubiquitin-protein ligase TRIM39	1e-74	.

## Sheet: S5.4 hypo in both cell types
scaffold	start	stop	Chr	sperm avg. meth	RBC avg. meth	CG_in_tile	island_annot	dist to closest gene	O.my gene ID	UniProt ID	UniProt Full Name	E-value	Repeat Description
scaffold_1	889601	889700	chrUn_26	0.328074	1.30945	9	island	0	GSONMT00064048001	DBX1A_DANRE	Homeobox protein DBX1-A	3e-129	.
scaffold_10	200201	200300	chrUn_7	0.127578	0.474174	5	shore	-71	GSONMT00064203001	CP27B_HUMAN	25-hydroxyvitamin D-1 alpha hydroxylase, mitochondrial	9e-174	.
scaffold_10	200301	200400	chrUn_7	0.2177	1.25252	4	shore	-171	GSONMT00064203001	CP27B_HUMAN	25-hydroxyvitamin D-1 alpha hydroxylase, mitochondrial	9e-174	.
scaffold_100	92101	92200	chrUn_17	0.455396	13.3272	10	shore	.	.		.	.	.
scaffold_100	92201	92300	chrUn_17	0.257245	5.50007	8	shore	.	.		.	.	.
scaffold_100	1673501	1673600	chrUn_17	0.25641	0.684497	6	island	0	GSONMT00064382001	TRI39_HUMAN	E3 ubiquitin-protein ligase TRIM39	1e-17	.
scaffold_100	1673601	1673700	chrUn_17	0.129927	0.118912	9	island	0	GSONMT00064382001	TRI39_HUMAN	E3 ubiquitin-protein ligase TRIM39	1e-17	.
scaffold_100	1700601	1700700	chrUn_17	1.37158	0.994054	10	island	.	.		.	.	.
scaffold_10033	4501	4600	chrUn	0.505487	5.7615	5	shore	0	GSONMT00012658001	RAB13_DANRE	Ras-related protein Rab-13	6e-45	.
scaffold_1005	16101	16200	chrUn_12	0.539101	1.12519	7	island	.	.		.	.	.
scaffold_1005	16201	16300	chrUn_12	0.525196	1.5305	9	island	.	.		.	.	.
scaffold_1006	10201	10300	chrUn_27	0.973493	2.21271	9	open sea	0	GSONMT00020423001	PRR18_MOUSE	Proline-rich protein 18	7e-15	.
scaffold_101	205501	205600	chrUn_11	1.92118	2.90368	10	island	0	GSONMT00064391001	CCNY_HUMAN	Cyclin-Y	3e-43	.
scaffold_10134	5501	5600	chrUn	0.167983	0.779005	6	island	.	.		.	.	.
scaffold_10134	5601	5700	chrUn	0.592042	0.365316	7	island	.	.		.	.	.
scaffold_10145	8901	9000	chrUn	2.11303	2.61433	4	open sea	259	GSONMT00007419001	NU4LM_ONCMY	NADH-ubiquinone oxidoreductase chain 4L	1e-25	.
scaffold_10145	9101	9200	chrUn	0.619595	0.346615	4	open sea	459	GSONMT00007419001	NU4LM_ONCMY	NADH-ubiquinone oxidoreductase chain 4L	1e-25	.
scaffold_10145	9201	9300	chrUn	0.0860585	0.59841	3	open sea	559	GSONMT00007419001	NU4LM_ONCMY	NADH-ubiquinone oxidoreductase chain 4L	1e-25	.
scaffold_10145	21401	21500	chrUn	7.54054	2.9487	3	open sea	.	.		.	.	.
scaffold_10154	15201	15300	chrUn	0.192984	0.429382	8	island	.	.		.	.	.
scaffold_10154	15301	15400	chrUn	0.372201	0.365501	9	island	.	.		.	.	.
scaffold_1019	341701	341800	chrUn	0	0.589169	7	island	-8930	GSONMT00022664001	ABH15_HUMAN	Abhydrolase domain-containing protein 15	4e-99	.
scaffold_102	1554201	1554300	chrUn_23	1.3265	2.43692	5	shore	0	GSONMT00064498001	CP1B1_HUMAN	Cytochrome P450 1B1	0	.
scaffold_10282	19101	19200	chrUn	1.78314	2.4535	9	island	0	GSONMT00020600001	NGN1_DANRE	Neurogenin-1	4e-60	.
scaffold_10282	19201	19300	chrUn	0.461235	0.742979	11	island	0	GSONMT00020600001	NGN1_DANRE	Neurogenin-1	4e-60	.
scaffold_10299	5601	5700	chrUn	2.0804	1.91237	9	island	0	GSONMT00014412001	UCHL1_HORSE	Ubiquitin carboxyl-terminal hydrolase isozyme L1	5e-44	.
scaffold_103	442301	442400	chrUn_9	0.308964	0.49882	5	shore	.	.		.	.	.
scaffold_1030	6501	6600	chrUn_8	3.05041	6.54532	7	island	0	GSONMT00007262001	NANO3_HUMAN	Nanos homolog 3	3e-27	.
scaffold_1033	116301	116400	chrUn_27	0.464905	3.29528	6	island	0	GSONMT00049097001	FOXG1_CHICK	Forkhead box protein G1	4e-82	.
scaffold_10331	2101	2200	chrUn	0.730913	0.349845	5	open sea	0	GSONMT00015343001	THAP5_MACFA	THAP domain-containing protein 5	3e-33	.
scaffold_1039	279501	279600	chrUn	0.992376	4.23533	6	shore	0	GSONMT00039436001	SIX3_CHICK	Homeobox protein SIX3	2e-166	.
scaffold_1042	23501	23600	chrUn	0.190476	0.0234742	7	shore	0	GSONMT00054938001	PA2G4_MOUSE	Proliferation-associated protein 2G4	0	.
scaffold_1053	178801	178900	chrUn	0.422166	0.925726	7	shore	0	GSONMT00033324001	HXABA_TAKRU	Homeobox protein Hox-A11a	2e-134	.
scaffold_1053	179101	179200	chrUn	0	2.08997	6	island	0	GSONMT00033324001	HXABA_TAKRU	Homeobox protein Hox-A11a	2e-134	.
scaffold_1053	179401	179500	chrUn	0.20196	0.346713	10	island	0	GSONMT00033324001	HXABA_TAKRU	Homeobox protein Hox-A11a	2e-134	.
scaffold_1061	268701	268800	chrUn_26	6.34569	3.9359	2	open sea	0	GSONMT00058594001	PDE3B_RAT	cGMP-inhibited 3',5'-cyclic phosphodiesterase B	8e-177	.
scaffold_1062	340301	340400	chrUn	1.99802	3.10686	7	island	.	.		.	.	.
scaffold_10650	801	900	chrUn	0.628933	5.49207	10	island	.	.		.	.	.
scaffold_10650	901	1000	chrUn	1.95616	3.04544	10	island	.	.		.	.	.
scaffold_1067	280301	280400	chrUn_11	0.481419	0.177073	5	open sea	0	GSONMT00021693001	DGUOK_MOUSE	Deoxyguanosine kinase, mitochondrial	6e-90	.
scaffold_1067	280401	280500	chrUn_11	1.60309	0.682322	7	open sea	0	GSONMT00021693001	DGUOK_MOUSE	Deoxyguanosine kinase, mitochondrial	6e-90	.
scaffold_10689	15401	15500	chrUn_4	1.78483	2.89415	9	island	0	GSONMT00055916001	ONEC2_HUMAN	One cut domain family member 2	2e-104	.
scaffold_10797	8101	8200	chrUn_27	1.8573	2.48577	7	island	7022	GSONMT00001522001	CS047_MOUSE	Uncharacterized protein C19orf47 homolog	5e-64	.
scaffold_10797	8201	8300	chrUn_27	0.400162	0.835243	7	island	6922	GSONMT00001522001	CS047_MOUSE	Uncharacterized protein C19orf47 homolog	5e-64	.
scaffold_10802	12001	12100	chrUn	0.388686	0.793388	8	shore	-1445	GSONMT00033504001	KCNA1_HUMAN	Potassium voltage-gated channel subfamily A member 1	0	.
scaffold_1089	221701	221800	chrUn_18	1.40453	6.55178	5	open sea	-2914	GSONMT00010082001	ZN835_HUMAN	Zinc finger protein 835	1e-79	.
scaffold_109	135201	135300	chrUn_12	1.27094	1.0199	7	island	0	GSONMT00064823001	KLH11_HUMAN	Kelch-like protein 11	0	.
scaffold_1094	279501	279600	chrUn	1.71095	1.46074	9	island	0	GSONMT00043600001	PRP4B_RAT	Serine/threonine-protein kinase PRP4 homolog	0	.
scaffold_1094	279601	279700	chrUn	1.20621	0.681594	6	island	0	GSONMT00043600001	PRP4B_RAT	Serine/threonine-protein kinase PRP4 homolog	0	.
scaffold_10984	18501	18600	chrUn	0.369467	2.25711	7	shore	-561	GSONMT00015776001	KCD16_HUMAN	BTB/POZ domain-containing protein KCTD16	7e-123	.
scaffold_1099	49501	49600	chrUn_6	0	0.257297	6	island	-5475	GSONMT00014469001	TBX18_MOUSE	T-box transcription factor TBX18	8e-129	.
scaffold_11	137901	138000	chrUn_6	1.1617	0.652933	6	shelf	8305	GSONMT00064879001	PDLI2_MOUSE	PDZ and LIM domain protein 2	4e-47	.
scaffold_1103	3201	3300	chrUn	5.44521	1.98071	3	shore	0	GSONMT00034252001	TLE1_HUMAN	Transducin-like enhancer protein 1	0	.
scaffold_11086	5001	5100	chrUn	0.399375	0.748848	13	island	-5855	GSONMT00023943001	ROP1_MOUSE	Ropporin-1	1e-60	.
scaffold_11086	5101	5200	chrUn	0.466657	0.471292	7	island	-5755	GSONMT00023943001	ROP1_MOUSE	Ropporin-1	1e-60	.
scaffold_11161	14301	14400	chrUn	0.510435	1.30598	6	shore	0	GSONMT00062071001	FXI2A_XENLA	Forkhead box protein I2-A	4e-115	.
scaffold_11161	14401	14500	chrUn	0.964095	2.47326	6	island	0	GSONMT00062071001	FXI2A_XENLA	Forkhead box protein I2-A	4e-115	.
scaffold_11161	14501	14600	chrUn	0.90473	6.48529	10	island	0	GSONMT00062071001	FXI2A_XENLA	Forkhead box protein I2-A	4e-115	.
scaffold_11161	14601	14700	chrUn	0.218556	1.90963	6	island	0	GSONMT00062071001	FXI2A_XENLA	Forkhead box protein I2-A	4e-115	.
scaffold_11161	15401	15500	chrUn	1.43245	5.75302	5	shore	0	GSONMT00062071001	FXI2A_XENLA	Forkhead box protein I2-A	4e-115	.
scaffold_1118	230001	230100	chrUn	0.748025	2.20761	3	shore	0	GSONMT00027102001	S39A6_PONAB	Zinc transporter ZIP6	2e-45	.
scaffold_1122	70501	70600	chrUn	0.217028	0.0598567	9	island	0	GSONMT00047155001	THA11_DANRE	THAP domain-containing protein 11	8e-97	.
scaffold_1122	70601	70700	chrUn	7.1316	7.68254	9	island	0	GSONMT00047155001	THA11_DANRE	THAP domain-containing protein 11	8e-97	.
scaffold_1122	70701	70800	chrUn	0.773557	0.365106	8	island	0	GSONMT00047155001	THA11_DANRE	THAP domain-containing protein 11	8e-97	.
scaffold_1122	204601	204700	chrUn	0.519658	1.25043	6	island	-4835	GSONMT00047174001	GNAO_BOVIN	Guanine nucleotide-binding protein G(o) subunit alpha	8e-136	.
scaffold_1131	27701	27800	chr_5	0.211864	3.23861	4	shore	0	GSONMT00048605001	GSX2_HUMAN	GS homeobox 2	6e-93	.
scaffold_11345	7201	7300	chrUn	0.57338	0.753778	8	island	0	GSONMT00024436001	NGN1_DANRE	Neurogenin-1	1e-64	.
scaffold_1136	199901	200000	chrUn	0.596599	0.812238	4	shelf	0	GSONMT00014892001	RIPL1_MOUSE	RILP-like protein 1	5e-114	.
scaffold_1139	32701	32800	chrUn_14	0.390465	0.322984	7	island	0	GSONMT00031071001	PURA_MOUSE	Transcriptional activator protein Pur-alpha	3e-159	.
scaffold_1139	32801	32900	chrUn_14	0.724964	0.357314	9	island	0	GSONMT00031071001	PURA_MOUSE	Transcriptional activator protein Pur-alpha	3e-159	.
scaffold_1139	33101	33200	chrUn_14	0.852746	0.512958	6	island	0	GSONMT00031071001	PURA_MOUSE	Transcriptional activator protein Pur-alpha	3e-159	.
scaffold_1139	35701	35800	chrUn_14	0.579081	1.61512	8	island	-2331	GSONMT00031071001	PURA_MOUSE	Transcriptional activator protein Pur-alpha	3e-159	.
scaffold_1139	35801	35900	chrUn_14	0.235688	2.69465	10	island	-2431	GSONMT00031071001	PURA_MOUSE	Transcriptional activator protein Pur-alpha	3e-159	.
scaffold_1139	35901	36000	chrUn_14	0.335081	5.2089	5	island	-2531	GSONMT00031071001	PURA_MOUSE	Transcriptional activator protein Pur-alpha	3e-159	.
scaffold_114	1144501	1144600	chrUn_6	1.43044	1.9446	4	open sea	0	GSONMT00065285001	HCN1_RAT	Potassium/sodium hyperpolarization-activated cyclic nucleotide-gated channel 1	5e-25	.
scaffold_114	1144701	1144800	chrUn_6	0.565766	4.5053	3	open sea	0	GSONMT00065285001	HCN1_RAT	Potassium/sodium hyperpolarization-activated cyclic nucleotide-gated channel 1	5e-25	.
scaffold_114	1624101	1624200	chrUn_6	0.340671	0.549715	7	open sea	0	GSONMT00065300001	ATS20_MOUSE	A disintegrin and metalloproteinase with thrombospondin motifs 20	8e-46	.
scaffold_11488	9901	10000	chrUn	0.240599	0.697119	3	shelf	.	.		.	.	.
scaffold_115	155001	155100	chrUn_4	0.803705	0.958497	9	island	.	.		.	.	.
scaffold_115	760701	760800	chrUn_4	1.17284	3.25876	10	island	0	GSONMT00065324001	FXC1A_DANRE	Forkhead box C1-A	0	.
scaffold_115	1098301	1098400	chrUn_4	0.40283	5.85273	6	island	0	GSONMT00065333001	IRF4_MOUSE	Interferon regulatory factor 4	3e-159	.
scaffold_115	1485601	1485700	chrUn_4	0.333338	0.827305	5	island	0	GSONMT00065346001	IBP3_HUMAN	Insulin-like growth factor-binding protein 3	3e-31	.
scaffold_115	1485701	1485800	chrUn_4	0.311291	0.846805	11	island	0	GSONMT00065346001	IBP3_HUMAN	Insulin-like growth factor-binding protein 3	3e-31	.
scaffold_1151	36601	36700	chrUn_28	0.311898	0.108264	8	island	0	GSONMT00020115001	SCC4_XENLA	MAU2 chromatid cohesion factor homolog	2e-110	.
scaffold_1155	121101	121200	chrUn_29	1.01275	1.74413	11	island	0	GSONMT00041867001	PCD10_HUMAN	Protocadherin-10	0	.
scaffold_1155	121401	121500	chrUn_29	0.29325	2.14303	9	island	0	GSONMT00041867001	PCD10_HUMAN	Protocadherin-10	0	.
scaffold_1155	121501	121600	chrUn_29	0.562379	2.71124	7	island	0	GSONMT00041867001	PCD10_HUMAN	Protocadherin-10	0	.
scaffold_116	755601	755700	chrUn_7	0.359488	0.903755	8	island	0	GSONMT00065398001	KCNK9_XENLA	Potassium channel subfamily K member 9	6e-144	.
scaffold_11603	701	800	chrUn	0.861889	0.782628	9	island	.	.		.	.	.
scaffold_11630	5501	5600	chrUn	0.38313	0.687628	5	open sea	-67	GSONMT00061304001	NTNG2_HUMAN	Netrin-G2	4e-22	.
scaffold_1168	51301	51400	chrUn_20	0.895377	0.0837371	6	shore	-115	GSONMT00062364001	FAS_CHICK	Fatty acid synthase	0	.
scaffold_117	951001	951100	chrUn_20	0.418621	0.476948	4	open sea	0	GSONMT00065484001	TBC12_XENTR	TBC1 domain family member 12	2e-24	.
scaffold_117	951101	951200	chrUn_20	0.358642	0.28662	7	open sea	0	GSONMT00065484001	TBC12_XENTR	TBC1 domain family member 12	2e-24	.
scaffold_117	951301	951400	chrUn_20	0.944833	1.37214	5	open sea	0	GSONMT00065484001	TBC12_XENTR	TBC1 domain family member 12	2e-24	.
scaffold_11736	15101	15200	chrUn	6.48054	0.244141	8	island	0	GSONMT00063426001	CNNM4_HUMAN	Metal transporter CNNM4	0	.
scaffold_11736	15201	15300	chrUn	1.45391	1.54366	9	island	0	GSONMT00063426001	CNNM4_HUMAN	Metal transporter CNNM4	0	.
scaffold_11736	15301	15400	chrUn	0.465189	0.283009	9	island	0	GSONMT00063426001	CNNM4_HUMAN	Metal transporter CNNM4	0	.
scaffold_1176	214201	214300	chrUn_2	0.129199	4.41413	2	shelf	0	GSONMT00059236001	DBX1B_DANRE	Homeobox protein DBX1-B	1e-139	.
scaffold_1183	234601	234700	chrUn_28	1.58417	5.90791	7	island	0	GSONMT00007132001		.	.	.
scaffold_1187	228201	228300	chrUn_21	0.847242	1.17509	7	island	5447	GSONMT00040203001	UH1BL_XENLA	UHRF1-binding protein 1-like	1e-65	.
scaffold_1187	228301	228400	chrUn_21	0.404303	0.119251	8	island	5547	GSONMT00040203001	UH1BL_XENLA	UHRF1-binding protein 1-like	1e-65	.
scaffold_11881	14301	14400	chrUn	0.488985	1.86835	7	shore	0	GSONMT00042107001	EXT1_HUMAN	Exostosin-1	2e-178	.
scaffold_11881	14401	14500	chrUn	0.822427	0.795323	5	island	0	GSONMT00042107001	EXT1_HUMAN	Exostosin-1	2e-178	.
scaffold_12	1388601	1388700	chrUn_4	0.0565611	0.0994244	10	island	0	GSONMT00065697001	FAXC_RAT	Failed axon connections homolog	0	.
scaffold_12	1388701	1388800	chrUn_4	2.35514	2.47044	10	island	0	GSONMT00065697001	FAXC_RAT	Failed axon connections homolog	0	.
scaffold_12	1406801	1406900	chrUn_4	1.17711	4.71548	8	island	0	GSONMT00065699001	PO3F2_DANRE	POU domain, class 3, transcription factor 2	0	.
scaffold_12	1406901	1407000	chrUn_4	1.49565	5.79429	11	island	0	GSONMT00065699001	PO3F2_DANRE	POU domain, class 3, transcription factor 2	0	.
scaffold_1205	119501	119600	chrUn_14	0.50962	3.14622	4	shelf	0	GSONMT00049480001	AP2E_DANRE	Transcription factor AP-2-epsilon	0	.
scaffold_121	1223001	1223100	chrUn_1	0.567815	0.738565	11	island	0	GSONMT00065870001	MAML1_HUMAN	Mastermind-like protein 1	9e-53	.
scaffold_121	1223101	1223200	chrUn_1	3.43999	2.91312	6	island	0	GSONMT00065870001	MAML1_HUMAN	Mastermind-like protein 1	9e-53	.
scaffold_1211	301	400	chr_12	0.154585	1.39174	9	island	.	.		.	.	.
scaffold_12150	12801	12900	chrUn	0.507688	1.22711	9	island	0	GSONMT00029008001	TBX22_MOUSE	T-box transcription factor TBX22	8e-35	.
scaffold_1220	253101	253200	chrUn	1.27474	0.482769	3	shore	0	GSONMT00016242001	ROAA_MOUSE	Heterogeneous nuclear ribonucleoprotein A/B	2e-103	.
scaffold_1220	253201	253300	chrUn	0.158331	0.201784	4	shore	0	GSONMT00016242001	ROAA_MOUSE	Heterogeneous nuclear ribonucleoprotein A/B	2e-103	.
scaffold_1224	17601	17700	chrUn_Sex	0.434793	0.825477	7	island	0	GSONMT00029406001	PURB_DANRE	Transcriptional activator protein Pur-beta	2e-124	.
scaffold_1226	139601	139700	chrUn	0.0995025	5.06395	4	island	0	GSONMT00048126001	ZN503_DANRE	Zinc finger protein 503	0	.
scaffold_1226	139701	139800	chrUn	0.888788	13.7019	5	island	0	GSONMT00048126001	ZN503_DANRE	Zinc finger protein 503	0	.
scaffold_1226	139901	140000	chrUn	0.492975	2.7835	3	shore	0	GSONMT00048126001	ZN503_DANRE	Zinc finger protein 503	0	.
scaffold_12266	14501	14600	chrUn	2.60202	6.91992	8	island	0	GSONMT00059573001	EDNRB_PIG	Endothelin B receptor	5e-126	.
scaffold_12266	14601	14700	chrUn	0.97477	3.7704	7	island	0	GSONMT00059573001	EDNRB_PIG	Endothelin B receptor	5e-126	.
scaffold_1229	118101	118200	chrUn_17	1.36565	0.441484	6	island	-296	GSONMT00036675001	TAF4_HUMAN	Transcription initiation factor TFIID subunit 4	0	.
scaffold_1229	118201	118300	chrUn_17	0.383862	0.260038	9	island	-396	GSONMT00036675001	TAF4_HUMAN	Transcription initiation factor TFIID subunit 4	0	.
scaffold_123	339101	339200	chrUn_16	0.717088	1.10828	6	open sea	0	GSONMT00065976001	HXB8A_DANRE	Homeobox protein Hox-B8a	5e-64	.
scaffold_124	84901	85000	chrUn_6	0.992609	0.855426	14	open sea	6368	GSONMT00066051001	PHLP2_HUMAN	PH domain leucine-rich repeat-containing protein phosphatase 2	0	.
scaffold_124	1143901	1144000	chrUn_6	0.801702	0.271207	5	shore	-2552	GSONMT00066121001	GFOD2_HUMAN	Glucose-fructose oxidoreductase domain-containing protein 2	7e-27	.
scaffold_124	1144001	1144100	chrUn_6	0.0766284	0.173979	9	island	-2652	GSONMT00066121001	GFOD2_HUMAN	Glucose-fructose oxidoreductase domain-containing protein 2	7e-27	.
scaffold_1241	249301	249400	chrUn	0.414819	0.550363	2	open sea	-300	GSONMT00009488001	HBB1_PSEUR	Hemoglobin subunit beta-1	3e-23	.
scaffold_1245	6201	6300	chrUn	0.220588	0.907233	3	open sea	0	GSONMT00054755001	EDAR_ORYLA	Tumor necrosis factor receptor superfamily member EDAR	3e-127	.
scaffold_1246	109401	109500	chrUn	9.64761	7.92241	2	open sea	-5453	GSONMT00015590001	RND3_HUMAN	Rho-related GTP-binding protein RhoE	7e-116	.
scaffold_12529	701	800	chrUn	2.84417	1.72528	6	island	.	.		.	.	.
scaffold_12560	10401	10500	chrUn	0.018615	2.09085	10	island	0	GSONMT00003778001	HXC1A_DANRE	Homeobox protein Hox-C1a	2e-46	.
scaffold_1257	254601	254700	chrUn	0.531798	2.11443	8	island	-5537	GSONMT00029451001	TBCA_RAT	Tubulin-specific chaperone A	1e-39	.
scaffold_1257	279801	279900	chrUn	1.90122	4.48789	10	island	0	GSONMT00029453001	OTBP_DANRE	Homeobox protein orthopedia B	9e-128	.
scaffold_126	1190701	1190800	chr_17	0.409063	2.0503	6	shore	0	GSONMT00066230001	HOX71_XENLA	Homeobox protein XHOX-7.1, partial	6e-108	.
scaffold_1260	273901	274000	chrUn	1.0506	0.205838	3	open sea	.	.		.	.	.
scaffold_1271	127201	127300	chrUn	0.740968	1.18334	7	island	.	.		.	.	.
scaffold_1271	127301	127400	chrUn	0.814926	2.41539	8	island	.	.		.	.	.
scaffold_1271	238201	238300	chrUn	1.7626	3.55298	10	shore	0	GSONMT00020058001	OTBP_DANRE	Homeobox protein orthopedia B	2e-121	.
scaffold_1280	73801	73900	chrUn	0.241228	0.0967129	3	open sea	-868	GSONMT00007657001	MN1_HUMAN	Probable tumor suppressor protein MN1	0	.
scaffold_129	479101	479200	chr_6	0.330785	0.200811	5	open sea	-9	GSONMT00066371001	S35D2_BOVIN	UDP-N-acetylglucosamine/UDP-glucose/GDP-mannose transporter	5e-119	.
scaffold_1320	13401	13500	chrUn	0	0.227764	11	island	0	GSONMT00017385001	IRS2B_XENLA	Insulin receptor substrate 2-B	0	.
scaffold_13211	3801	3900	chrUn	0.31746	1.20448	8	open sea	.	.		.	.	.
scaffold_13232	2701	2800	chrUn	5.53395	4.38694	2	open sea	.	.		.	.	.
scaffold_1328	16501	16600	chrUn_23	0.76619	2.43898	4	shore	0	GSONMT00024710001	CP26A_DANRE	Cytochrome P450 26A1	0	.
scaffold_1328	16601	16700	chrUn_23	0.442192	1.76944	6	shore	0	GSONMT00024710001	CP26A_DANRE	Cytochrome P450 26A1	0	.
scaffold_133	134601	134700	chrUn_5	0.500538	2.39184	10	island	0	GSONMT00066685001	DMTA2_DANRE	Doublesex- and mab-3-related transcription factor A2	0	.
scaffold_133	134701	134800	chrUn_5	0.264646	1.31553	7	island	0	GSONMT00066685001	DMTA2_DANRE	Doublesex- and mab-3-related transcription factor A2	0	.
scaffold_13324	4601	4700	chrUn	2.39232	0.96248	11	island	0	GSONMT00035234001	RHES_RAT	GTP-binding protein Rhes	3e-62	.
scaffold_13324	4701	4800	chrUn	2.94724	3.34845	8	island	0	GSONMT00035234001	RHES_RAT	GTP-binding protein Rhes	3e-62	.
scaffold_13324	4801	4900	chrUn	0.900246	1.2355	7	island	0	GSONMT00035234001	RHES_RAT	GTP-binding protein Rhes	3e-62	.
scaffold_13529	6701	6800	chrUn	0.139902	3.22442	5	shore	.	.		.	.	.
scaffold_13559	7301	7400	chrUn	0.143383	4.63893	7	shore	0	GSONMT00027231001	PCD10_HUMAN	Protocadherin-10	0	.
scaffold_13559	7401	7500	chrUn	0.35026	3.17752	4	shore	0	GSONMT00027231001	PCD10_HUMAN	Protocadherin-10	0	.
scaffold_13559	8601	8700	chrUn	0.402633	2.63286	8	island	0	GSONMT00027231001	PCD10_HUMAN	Protocadherin-10	0	.
scaffold_13559	8801	8900	chrUn	0.0807574	1.80036	6	island	0	GSONMT00027231001	PCD10_HUMAN	Protocadherin-10	0	.
scaffold_13559	9501	9600	chrUn	0.668103	2.17273	9	shore	0	GSONMT00027231001	PCD10_HUMAN	Protocadherin-10	0	.
scaffold_136	1209701	1209800	chrUn_20	0.793386	0.188967	6	open sea	0	GSONMT00066885001	PRM1A_DANRE	Prominin-1-A	1e-19	.
scaffold_13623	1701	1800	chrUn	2.22613	12.5707	8	open sea	.	.		.	.	.
scaffold_13674	9601	9700	chrUn	0.262796	6.36817	8	open sea	.	.		.	.	.
scaffold_1372	21601	21700	chrUn_2	1.1988	1.52179	4	island	0	GSONMT00048429001	CFTR_HUMAN	Cystic fibrosis transmembrane conductance regulator	4e-140	.
scaffold_13771	2301	2400	chrUn	3.02543	4.04847	3	shelf	1853	GSONMT00049913001	KLH38_DANRE	Kelch-like protein 38	0	.
scaffold_1378	186001	186100	chrUn_18	0.148301	0.26475	9	island	-2034	GSONMT00015207001	PSB4_XENLA	Proteasome subunit beta type-4	1e-145	.
scaffold_1378	186101	186200	chrUn_18	1.93047	2.28181	8	island	-1934	GSONMT00015207001	PSB4_XENLA	Proteasome subunit beta type-4	1e-145	.
scaffold_1378	186201	186300	chrUn_18	0.422609	0.782865	6	island	-1834	GSONMT00015207001	PSB4_XENLA	Proteasome subunit beta type-4	1e-145	.
scaffold_138	1087901	1088000	chrUn_29	0.420336	0.146176	11	island	0	GSONMT00066956001	A33_PLEWA	Zinc-binding protein A33	2e-89	.
scaffold_1381	60001	60100	chrUn	0.167391	0.0241984	7	open sea	.	.		.	.	.
scaffold_1385	181201	181300	chrUn_18	0	1.18485	5	shore	8338	GSONMT00014994001	SERC1_MOUSE	Serine incorporator 1	2e-158	.
scaffold_1387	10701	10800	chrUn	0	0.873167	6	island	.	.		.	.	.
scaffold_1387	10801	10900	chrUn	1.33083	4.52148	9	island	.	.		.	.	.
scaffold_13881	9201	9300	chrUn	0.201296	0.761997	10	island	0	GSONMT00054967001		.	.	.
scaffold_1395	161701	161800	chrUn_20	0.567726	0.216789	8	island	-30	GSONMT00016525001	MFRN2_DANRE	Mitoferrin-2	0	.
scaffold_1395	161801	161900	chrUn_20	0.475939	0.594996	10	island	0	GSONMT00016525001	MFRN2_DANRE	Mitoferrin-2	0	.
scaffold_1397	184401	184500	chrUn	1.50534	1.80555	6	island	0	GSONMT00011822001	AN32B_BOVIN	Acidic leucine-rich nuclear phosphoprotein 32 family member B	2e-63	.
scaffold_1397	184501	184600	chrUn	0.26424	1.10714	8	island	0	GSONMT00011822001	AN32B_BOVIN	Acidic leucine-rich nuclear phosphoprotein 32 family member B	2e-63	.
scaffold_140	637701	637800	chrUn_9	0.186567	0.716143	2	shelf	-2	GSONMT00067171001	NFIB_HUMAN	Nuclear factor 1 B-type	0	.
scaffold_1400	238401	238500	chrUn_8	0.648865	2.02459	7	island	0	GSONMT00051668001	C1QL3_HUMAN	Complement C1q-like protein 3	2e-108	.
scaffold_14036	2501	2600	chrUn	0.30064	0.408887	7	island	.	.		.	.	.
scaffold_141	67801	67900	chrUn_Sex	0.321068	1.52699	5	shore	-108	GSONMT00067241001	GA45G_RAT	Growth arrest and DNA damage-inducible protein GADD45 gamma	4e-63	.
scaffold_141	1104001	1104100	chrUn_Sex	0.461139	1.48729	13	island	0	GSONMT00067291001	S12A2_HUMAN	Solute carrier family 12 member 2	0	.
scaffold_141	1104101	1104200	chrUn_Sex	0.454708	0.474707	4	island	0	GSONMT00067291001	S12A2_HUMAN	Solute carrier family 12 member 2	0	.
scaffold_14168	3301	3400	chrUn	1.82666	8.34242	7	shore	0	GSONMT00011298001	FXL14_MOUSE	F-box/LRR-repeat protein 14	0	.
scaffold_14168	3401	3500	chrUn	1.34834	2.2342	3	shore	0	GSONMT00011298001	FXL14_MOUSE	F-box/LRR-repeat protein 14	0	.
scaffold_14168	3801	3900	chrUn	0.648243	1.14151	5	island	0	GSONMT00011298001	FXL14_MOUSE	F-box/LRR-repeat protein 14	0	.
scaffold_1430	111701	111800	chrUn	1.10145	1.82266	13	island	0	GSONMT00007160001	BICD2_HUMAN	Protein bicaudal D homolog 2	8e-167	.
scaffold_14330	5701	5800	chrUn	0.104822	2.32515	11	island	0	GSONMT00012367001	SCRT2_MOUSE	Transcriptional repressor scratch 2	4e-92	.
scaffold_14330	5801	5900	chrUn	0.886081	0.721679	5	island	0	GSONMT00012367001	SCRT2_MOUSE	Transcriptional repressor scratch 2	4e-92	.
scaffold_1438	2201	2300	chrUn	0.94783	5.24823	5	island	0	GSONMT00032041001	IRX1_XENTR	Iroquois-class homeodomain protein irx-1	3e-99	.
scaffold_1439	3401	3500	chrUn	0.220662	0.481544	7	open sea	0	GSONMT00030998001	ASTER_BOVIN	Protein Asterix	3e-65	.
scaffold_14458	9201	9300	chrUn	0.0816993	0.340136	8	open sea	.	.		.	.	.
scaffold_1448	205401	205500	chrUn_3	0.452376	0.138272	9	island	0	GSONMT00047274001	MEGF8_RAT	Multiple epidermal growth factor-like domains protein 8	0	.
scaffold_1448	205501	205600	chrUn_3	1.25798	0.645632	5	island	0	GSONMT00047274001	MEGF8_RAT	Multiple epidermal growth factor-like domains protein 8	0	.
scaffold_14566	7101	7200	chrUn	0.645341	0.643017	11	island	0	GSONMT00058823001	NRF1_DANRE	Nuclear respiratory factor 1	4e-81	.
scaffold_1457	220701	220800	chrUn_3	0.961125	0.394689	13	island	0	GSONMT00026849001	ZBT11_HUMAN	Zinc finger and BTB domain-containing protein 11	1e-20	.
scaffold_1468	153701	153800	chrUn	0.132275	1.12954	6	island	0	GSONMT00037617001	IER5L_DANRE	Immediate early response gene 5-like protein	8e-171	.
scaffold_147	107601	107700	chr_27	0.200984	0.723944	3	island	-268	GSONMT00067542001	BARX2_HUMAN	Homeobox protein BarH-like 2	7e-37	.
scaffold_1472	901	1000	chr_3	1.83447	1.39274	7	shore	7652	GSONMT00005019001	SF3B1_HUMAN	Splicing factor 3B subunit 1	0	.
scaffold_148	672801	672900	chrUn_19	0.993441	2.33346	8	island	0	GSONMT00067609001	I2BLB_XENLA	Interferon regulatory factor 2-binding protein-like B	0	.
scaffold_148	672901	673000	chrUn_19	1.87515	2.8849	7	island	0	GSONMT00067609001	I2BLB_XENLA	Interferon regulatory factor 2-binding protein-like B	0	.
scaffold_148	1454701	1454800	chrUn_19	2.08102	0.490683	8	open sea	.	.		.	.	.
scaffold_14805	4301	4400	chrUn	0.125313	0.811787	3	open sea	0	GSONMT00030145001	MNX1_HUMAN	Motor neuron and pancreas homeobox protein 1	1e-46	.
scaffold_14904	4801	4900	chrUn	1.51407	4.95114	8	island	1015	GSONMT00018254001	ID1_HUMAN	DNA-binding protein inhibitor ID-1	6e-39	.
scaffold_1492	70401	70500	chrUn_16	0.890866	4.55664	7	island	-5392	GSONMT00033108001	CELR3_RAT	Cadherin EGF LAG seven-pass G-type receptor 3	0	.
scaffold_1492	169701	169800	chrUn_16	0.0763942	0.677706	5	island	.	.		.	.	.
scaffold_1497	77901	78000	chrUn	1.14265	0.501825	8	island	0	GSONMT00011181001	HEXIM_DANRE	Protein HEXIM	2e-71	.
scaffold_1497	78001	78100	chrUn	0.188513	0.371147	7	island	0	GSONMT00011181001	HEXIM_DANRE	Protein HEXIM	2e-71	.
scaffold_150	1396101	1396200	chrUn_6	0.342187	1.66535	5	island	0	GSONMT00067866001	NODAL_XENTR	Nodal homolog	2e-97	.
scaffold_150	1396201	1396300	chrUn_6	1.01225	2.39674	10	island	0	GSONMT00067866001	NODAL_XENTR	Nodal homolog	2e-97	.
scaffold_150	1396301	1396400	chrUn_6	0.902547	1.23321	7	island	0	GSONMT00067866001	NODAL_XENTR	Nodal homolog	2e-97	.
scaffold_150	1396401	1396500	chrUn_6	1.93784	4.85583	5	island	0	GSONMT00067866001	NODAL_XENTR	Nodal homolog	2e-97	.
scaffold_15002	11001	11100	chrUn	0.490746	0.884574	10	island	0	GSONMT00022333001	FUBP2_MOUSE	Far upstream element-binding protein 2	5e-31	.
scaffold_15002	11101	11200	chrUn	0.409314	0.435653	8	island	0	GSONMT00022333001	FUBP2_MOUSE	Far upstream element-binding protein 2	5e-31	.
scaffold_1501	215801	215900	chrUn	0.344634	0.897959	9	island	.	.		.	.	.
scaffold_1503	139201	139300	chrUn	0.0702999	0.257363	4	open sea	0	GSONMT00053186001	ROAA_MOUSE	Heterogeneous nuclear ribonucleoprotein A/B	6e-93	.
scaffold_15102	601	700	chrUn	0.433992	3.37669	8	open sea	.	.		.	.	.
scaffold_1514	140301	140400	chrUn_18	0.64768	0.466863	5	shore	.	.		.	.	.
scaffold_15221	10601	10700	chrUn	5.37212	4.45507	2	open sea	.	.		.	.	.
scaffold_153	273201	273300	chrUn_24	0.065331	0.181229	4	open sea	0	GSONMT00067991001	TIM50_DANRE	Mitochondrial import inner membrane translocase subunit TIM50	2e-135	.
scaffold_153	591601	591700	chrUn_24	0.165651	0.332226	9	shore	-727	GSONMT00068012001		.	.	.
scaffold_153	1176901	1177000	chrUn_24	0.582985	0.734636	6	island	0	GSONMT00068045001	TISDA_XENLA	Zinc finger protein 36, C3H1 type-like 2-A	1e-36	.
scaffold_153	1177001	1177100	chrUn_24	0.684473	0.835923	11	island	0	GSONMT00068045001	TISDA_XENLA	Zinc finger protein 36, C3H1 type-like 2-A	1e-36	.
scaffold_15300	9101	9200	chrUn	0.397685	4.81195	10	island	.	.		.	.	.
scaffold_15352	4901	5000	chrUn	1.0162	1.07334	5	open sea	.	.		.	.	.
scaffold_15439	2401	2500	chrUn	1.236	0.908525	6	island	0	GSONMT00004459001	MEIS1_HUMAN	Homeobox protein Meis1	2e-135	.
scaffold_15439	2501	2600	chrUn	0.693597	0.135261	3	island	0	GSONMT00004459001	MEIS1_HUMAN	Homeobox protein Meis1	2e-135	.
scaffold_1558	193101	193200	chrUn	0.673889	0.433187	11	island	0	GSONMT00020575001	ZSWM6_MOUSE	Zinc finger SWIM domain-containing protein 6	4e-41	.
scaffold_1562	96801	96900	chrUn	0.652483	0.216606	5	open sea	-155	GSONMT00056378001	CLH1_MOUSE	Clathrin heavy chain 1	0	.
scaffold_1570	108401	108500	chrUn	3.54533	4.72996	7	open sea	.	.		.	.	.
scaffold_1575	31301	31400	chrUn_2	0.917923	2.57794	7	island	0	GSONMT00063065001	MAFB_MOUSE	Transcription factor MafB	3e-86	.
scaffold_15750	1801	1900	chrUn	0.681188	5.55909	6	open sea	0	GSONMT00014102001		.	.	.
scaffold_15913	6401	6500	chrUn	0.0410509	0.415944	4	open sea	.	.		.	.	.
scaffold_1599	65001	65100	chrUn	1.0774	0.716324	8	open sea	0	GSONMT00030449001	PERQ1_MOUSE	PERQ amino acid-rich with GYF domain-containing protein 1	1e-96	.
scaffold_16	1503301	1503400	chrUn_12	0.531798	1.7516	10	island	.	.		.	.	.
scaffold_16	1503401	1503500	chrUn_12	1.61101	2.60843	5	island	.	.		.	.	.
scaffold_16	2093001	2093100	chrUn_12	0.0401768	7.97398	2	open sea	0	GSONMT00068412001	PCDC2_HUMAN	Protocadherin alpha-C2	0	.
scaffold_1610	7301	7400	chrUn_3	1.16376	7.14311	7	island	0	GSONMT00009341001	PO3F1_DANRE	POU domain, class 3, transcription factor 1	0	.
scaffold_16115	7501	7600	chrUn	0	0.813844	5	island	0	GSONMT00056975001	BHE40_RAT	Class E basic helix-loop-helix protein 40	4e-77	.
scaffold_16115	7601	7700	chrUn	1.76612	1.23258	7	island	-85	GSONMT00056975001	BHE40_RAT	Class E basic helix-loop-helix protein 40	4e-77	.
scaffold_1620	162801	162900	chrUn_3	0.497127	0.385078	7	island	-434	GSONMT00027123001	BMPER_MOUSE	BMP-binding endothelial regulator protein	0	.
scaffold_16466	1901	2000	chrUn	0.39022	0.319359	9	shore	0	GSONMT00051201001	PGRC2_RAT	Membrane-associated progesterone receptor component 2	8e-82	.
scaffold_16470	6801	6900	chrUn	0.785011	0.332958	9	open sea	.	.		.	.	.
scaffold_16470	6901	7000	chrUn	0	0.500829	5	open sea	.	.		.	.	.
scaffold_165	787001	787100	chrUn_22	0.259228	0.908476	8	open sea	-4938	GSONMT00068677001		.	.	.
scaffold_165	1264501	1264600	chrUn_22	0.168226	0.36878	4	shore	0	GSONMT00068689001	CB069_DANRE	UPF0565 protein C2orf69 homolog	2e-146	.
scaffold_1655	103601	103700	chrUn	1.75383	3.95687	9	island	0	GSONMT00041490001	TM238_MOUSE	Transmembrane protein 238	1e-21	.
scaffold_16551	201	300	chrUn	1.09193	0.653538	11	island	.	.		.	.	ID=RM895217;Name=RM895217;Note=Motif:Polinton-1_DR
scaffold_16560	6301	6400	chrUn	0.796371	1.32029	9	island	-1801	GSONMT00051427001	UB2D2_RAT	Ubiquitin-conjugating enzyme E2 D2	2e-95	.
scaffold_16560	6401	6500	chrUn	1.45326	6.82435	8	island	-1901	GSONMT00051427001	UB2D2_RAT	Ubiquitin-conjugating enzyme E2 D2	2e-95	.
scaffold_1659	92601	92700	chrUn	0.198765	0.70824	5	shore	-29	GSONMT00000352001	S2544_MOUSE	Solute carrier family 25 member 44	1e-75	.
scaffold_1661	147001	147100	chrUn	0.343588	1.35968	9	island	0	GSONMT00023889001	IHH_DANRE	Indian hedgehog B protein	0	.
scaffold_1661	147401	147500	chrUn	0.0949668	0.599323	7	island	0	GSONMT00023889001	IHH_DANRE	Indian hedgehog B protein	0	.
scaffold_1661	147501	147600	chrUn	0.464475	1.77378	7	island	0	GSONMT00023889001	IHH_DANRE	Indian hedgehog B protein	0	.
scaffold_16687	7501	7600	chrUn	0.105976	1.56536	9	island	-235	GSONMT00051137001	IBP1_BOVIN	Insulin-like growth factor-binding protein 1	5e-43	.
scaffold_167	346801	346900	chrUn_7	0.667995	1.0725	9	island	0	GSONMT00068758001	CELF4_DANRE	CUGBP Elav-like family member 4	2e-42	.
scaffold_167	1117901	1118000	chrUn_7	0.279636	0.376105	6	open sea	-554	GSONMT00068765001	RLA0_RANSY	60S acidic ribosomal protein P0	5e-180	.
scaffold_1676	11501	11600	chrUn	0.223964	0.946988	2	shelf	9639	GSONMT00015262001		.	.	.
scaffold_16788	3201	3300	chrUn	1.41039	1.24763	9	open sea	.	.		.	.	.
scaffold_1683	170601	170700	chrUn_16	0.219382	0.202499	4	shore	0	GSONMT00032482001		.	.	.
scaffold_1686	164801	164900	chrUn_28	0.615722	1.2855	7	island	.	.		.	.	.
scaffold_16946	8801	8900	chrUn	0.689616	0.236901	5	island	0	GSONMT00050436001	GRSF1_MOUSE	G-rich sequence factor 1	2e-30	.
scaffold_16983	2201	2300	chrUn	0.217376	0.608187	5	open sea	.	.		.	.	.
scaffold_16983	2301	2400	chrUn	0.258715	2.30647	4	open sea	.	.		.	.	.
scaffold_170	863301	863400	chrUn_23	0.53977	1.44202	7	island	0	GSONMT00068995001	HTR1A_DANRE	Serine protease HTRA1A	0	.
scaffold_17207	9001	9100	chrUn	0.32898	1.99199	8	island	-1637	GSONMT00061970001	CP26A_DANRE	Cytochrome P450 26A1	0	.
scaffold_17229	1001	1100	chrUn	1.61665	1.60252	8	shore	-35	GSONMT00033064001	FA84B_HUMAN	Protein FAM84B	2e-118	.
scaffold_1728	19601	19700	chrUn	0.218348	0.304034	9	island	0	GSONMT00045279001	COMD3_MOUSE	COMM domain-containing protein 3	9e-17	.
scaffold_173	245001	245100	chrUn_17	0.635356	1.04368	7	shore	0	GSONMT00069105001	TCF15_CHICK	Transcription factor 15	2e-76	.
scaffold_173	624401	624500	chrUn_17	0.329577	5.33847	6	island	0	GSONMT00069125001	KCNQ2_HUMAN	Potassium voltage-gated channel subfamily KQT member 2	0	.
scaffold_17306	6001	6100	chrUn	0.781228	0.0725437	6	shore	0	GSONMT00022666001	MESD1_MOUSE	Mesoderm development candidate 1	2e-162	.
scaffold_17306	6101	6200	chrUn	3.68024	1.19276	3	shore	0	GSONMT00022666001	MESD1_MOUSE	Mesoderm development candidate 1	2e-162	.
scaffold_1731	163001	163100	chrUn	0.346425	1.35667	6	shore	.	.		.	.	.
scaffold_1736	99601	99700	chrUn	3.34307	6.23374	9	island	0	GSONMT00041166001	A33_PLEWA	Zinc-binding protein A33	1e-73	.
scaffold_1736	99701	99800	chrUn	0.214073	0.91546	8	island	0	GSONMT00041166001	A33_PLEWA	Zinc-binding protein A33	1e-73	.
scaffold_1745	19801	19900	chrUn_11	0.824702	0.580532	5	island	0	GSONMT00008546001	PAN3_XENTR	PAB-dependent poly(A)-specific ribonuclease subunit PAN3	2e-74	.
scaffold_17460	3201	3300	chrUn	1.16585	0.336709	7	open sea	0	GSONMT00058192001	MTMRE_HUMAN	Myotubularin-related protein 14	1e-47	.
scaffold_175	1155501	1155600	chrUn_8	0.319795	1.74296	4	island	0	GSONMT00069259001	GBX1_HUMAN	Homeobox protein GBX-1	3e-114	.
scaffold_176	28301	28400	chrUn_5	0.980128	1.35947	7	open sea	0	GSONMT00069276001	RIPL1_HUMAN	RILP-like protein 1	1e-153	.
scaffold_176	28401	28500	chrUn_5	1.84965	2.34458	2	open sea	0	GSONMT00069276001	RIPL1_HUMAN	RILP-like protein 1	1e-153	.
scaffold_176	837001	837100	chrUn_5	0.678594	2.89867	4	shore	0	GSONMT00069317001	FOXG1_CHICK	Forkhead box protein G1	1e-86	.
scaffold_17671	4201	4300	chrUn	0	0.129571	7	island	0	GSONMT00027617001	PURA_MOUSE	Transcriptional activator protein Pur-alpha	2e-158	.
scaffold_17671	6901	7000	chrUn	0.657193	2.00886	8	island	-2078	GSONMT00027617001	PURA_MOUSE	Transcriptional activator protein Pur-alpha	2e-158	.
scaffold_17671	7001	7100	chrUn	0.392985	1.61032	8	island	-2178	GSONMT00027617001	PURA_MOUSE	Transcriptional activator protein Pur-alpha	2e-158	.
scaffold_17671	7201	7300	chrUn	0.388704	4.50756	12	island	-2378	GSONMT00027617001	PURA_MOUSE	Transcriptional activator protein Pur-alpha	2e-158	.
scaffold_177	403401	403500	chrUn	0.637432	0.692157	6	shore	0	GSONMT00069392001	SNUT1_HUMAN	U4/U6.U5 tri-snRNP-associated protein 1	0	.
scaffold_177	403501	403600	chrUn	0.453083	0.263827	9	island	0	GSONMT00069392001	SNUT1_HUMAN	U4/U6.U5 tri-snRNP-associated protein 1	0	.
scaffold_1773	113501	113600	chrUn_5	0.504798	0.259678	7	open sea	0	GSONMT00011385001	PBX1_XENLA	Pre-B-cell leukemia transcription factor 1	3e-49	.
scaffold_178	878501	878600	chrUn_16	0.37053	0.181818	6	open sea	0	GSONMT00069466001	DCAKD_DANRE	Dephospho-CoA kinase domain-containing protein	1e-108	.
scaffold_1782	140201	140300	chrUn_6	0.347152	0.729389	7	island	-679	GSONMT00042539001	FXD5B_XENLA	Forkhead box protein D5-B	3e-65	.
scaffold_1785	146401	146500	chrUn	0.533507	2.05506	6	island	0	GSONMT00032054001	GSG1L_DANRE	Germ cell-specific gene 1-like protein	7e-88	.
scaffold_1785	146501	146600	chrUn	0.615408	2.57827	7	island	0	GSONMT00032054001	GSG1L_DANRE	Germ cell-specific gene 1-like protein	7e-88	.
scaffold_17850	8401	8500	chrUn	0.662928	0.861455	5	open sea	.	.		.	.	.
scaffold_1786	30301	30400	chrUn	0.621167	0.534094	8	island	0	GSONMT00027991001	BHE22_CHICK	Class E basic helix-loop-helix protein 22	7e-72	.
scaffold_1786	30501	30600	chrUn	0.518582	1.19125	11	island	0	GSONMT00027991001	BHE22_CHICK	Class E basic helix-loop-helix protein 22	7e-72	.
scaffold_179	861201	861300	chr_10	0.47239	0.702547	7	island	0	GSONMT00069541001	SNUT1_HUMAN	U4/U6.U5 tri-snRNP-associated protein 1	0	.
scaffold_179	861301	861400	chr_10	0.350434	0.795232	8	island	0	GSONMT00069541001	SNUT1_HUMAN	U4/U6.U5 tri-snRNP-associated protein 1	0	.
scaffold_179	1248501	1248600	chr_10	0.847061	0.648992	6	island	0	GSONMT00069566001	AMMR1_PONAB	AMME syndrome candidate gene 1 protein homolog	3e-153	.
scaffold_1795	71101	71200	chrUn	0.46312	0.149713	8	shore	0	GSONMT00015572001	VANG2_DANRE	Vang-like protein 2	0	.
scaffold_17980	2201	2300	chrUn	0.476754	0.0724736	8	open sea	.	.		.	.	.
scaffold_1799	5101	5200	chrUn_14	0.345458	3.53161	8	island	0	GSONMT00055931001	KCNK9_XENLA	Potassium channel subfamily K member 9	1e-53	.
scaffold_1799	5201	5300	chrUn_14	0.547692	0.655881	7	island	0	GSONMT00055931001	KCNK9_XENLA	Potassium channel subfamily K member 9	1e-53	.
scaffold_18015	2401	2500	chrUn	0.193009	0.613039	11	island	1185	GSONMT00031707001	PTN4_MOUSE	Tyrosine-protein phosphatase non-receptor type 4	5e-18	.
scaffold_18015	2501	2600	chrUn	0.540657	0.585333	15	island	1285	GSONMT00031707001	PTN4_MOUSE	Tyrosine-protein phosphatase non-receptor type 4	5e-18	.
scaffold_1804	135901	136000	chrUn_12	0.679621	3.38037	7	island	0	GSONMT00006844001	ONEC2_HUMAN	One cut domain family member 2	3e-111	.
scaffold_1824	36201	36300	chrUn	0.61978	1.66791	6	island	8383	GSONMT00018766001	GRID2_DANRE	Glutamate receptor ionotropic, delta-2	0	.
scaffold_1824	36501	36600	chrUn	0.876943	1.3763	6	island	8083	GSONMT00018766001	GRID2_DANRE	Glutamate receptor ionotropic, delta-2	0	.
scaffold_18358	7401	7500	chrUn_6	0.392324	1.74943	6	island	.	.		.	.	.
scaffold_18358	7501	7600	chrUn_6	0.313518	3.55761	6	island	.	.		.	.	.
scaffold_186	825801	825900	chrUn_17	1.21927	0.257928	6	open sea	-52	GSONMT00070034001	PB1_HUMAN	Protein polybromo-1	0	.
scaffold_1862	97201	97300	chrUn	0.278934	1.32236	7	island	0	GSONMT00007065001	FOXD1_XENTR	Forkhead box protein D1	4e-77	.
scaffold_1862	97701	97800	chrUn	2.57973	4.76974	10	island	0	GSONMT00007065001	FOXD1_XENTR	Forkhead box protein D1	4e-77	.
scaffold_1862	97801	97900	chrUn	0.284651	1.32102	6	island	0	GSONMT00007065001	FOXD1_XENTR	Forkhead box protein D1	4e-77	.
scaffold_1863	2001	2100	chrUn_9	0.619096	1.72176	9	island	0	GSONMT00059459001	IHH_MOUSE	Indian hedgehog protein	1e-134	.
scaffold_1867	72501	72600	chrUn	0.953224	0.474911	7	island	0	GSONMT00039586001	PAX9_SAGOE	Paired box protein Pax-9	1e-119	.
scaffold_187	756301	756400	chrUn_19	0.187955	1.32951	6	open sea	-1403	GSONMT00070076001	FAT1_HUMAN	Protocadherin Fat 1	0	.
scaffold_1870	101001	101100	chrUn	0.263903	3.19533	6	island	.	.		.	.	.
scaffold_1870	101301	101400	chrUn	0.492845	4.04553	9	island	.	.		.	.	.
scaffold_18773	7601	7700	chrUn	0.742359	0.401423	8	open sea	.	.		.	.	.
scaffold_188	1105701	1105800	chr_23	0.635083	0.368942	6	island	0	GSONMT00070132001		.	.	.
scaffold_188	1258401	1258500	chr_23	0.0879079	2.49523	8	island	0	GSONMT00070142001	NHRF1_HUMAN	Na(+)/H(+) exchange regulatory cofactor NHE-RF1	4e-30	.
scaffold_18828	6801	6900	chrUn	2.0616	2.36259	5	island	.	.		.	.	.
scaffold_1887	107101	107200	chrUn	2.27806	1.28578	7	island	.	.		.	.	.
scaffold_1898	11001	11100	chrUn	0.636243	5.89724	7	island	0	GSONMT00061132001	MAFA_XENTR	Transcription factor MafA	3e-68	.
scaffold_19	30201	30300	chrUn_5	0.257241	1.1384	5	shore	0	GSONMT00070195001	ONEC2_HUMAN	One cut domain family member 2	2e-102	.
scaffold_190	549301	549400	chrUn_21	0.152788	0.186835	8	island	0	GSONMT00070291001	CG043_MOUSE	Uncharacterized protein C7orf43 homolog	4e-177	.
scaffold_190	666001	666100	chrUn_21	1.00297	12.5851	5	open sea	0	GSONMT00070298001	SX19A_DANRE	Transcription factor Sox-19a	2e-124	.
scaffold_1900	46301	46400	chrUn	0.178571	0.378453	8	open sea	0	GSONMT00046622001	ZNF76_MOUSE	Zinc finger protein 76	7e-79	.
scaffold_19229	1601	1700	chrUn_2	0.0241429	0.614437	4	shelf	-3897	GSONMT00035171001		.	.	.
scaffold_19229	1701	1800	chrUn_2	0.335429	0.920766	8	shelf	-3797	GSONMT00035171001		.	.	.
scaffold_1923	133401	133500	chrUn	0.299811	0.293172	10	island	0	GSONMT00026759001	ZFP91_HUMAN	E3 ubiquitin-protein ligase ZFP91	7e-103	.
scaffold_193	301401	301500	chrUn_17	0.414737	0	6	shore	0	GSONMT00070434001	AXIN2_DANRE	Axin-2	0	.
scaffold_193	992501	992600	chrUn_17	0.176913	0.310381	6	island	0	GSONMT00070464001	UBE2O_MOUSE	E2/E3 hybrid ubiquitin-protein ligase UBE2O	0	.
scaffold_193	1074501	1074600	chrUn_17	0.481427	1.08627	6	shore	0	GSONMT00070466001	SPHK1_MOUSE	Sphingosine kinase 1	2e-125	.
scaffold_193	1074601	1074700	chrUn_17	0	1.78591	7	island	0	GSONMT00070466001	SPHK1_MOUSE	Sphingosine kinase 1	2e-125	.
scaffold_19334	1201	1300	chrUn	0.296502	1.59371	13	island	.	.		.	.	.
scaffold_194	32001	32100	chrUn_5	0.328454	0.717108	4	shore	-48	GSONMT00070480001		.	.	.
scaffold_194	32301	32400	chrUn_5	0.0749064	0.789989	6	island	0	GSONMT00070480001		.	.	.
scaffold_1943	112401	112500	chrUn_17	0.791743	0.381277	8	shore	0	GSONMT00035256001	PLXD1_MOUSE	Plexin-D1	5e-130	.
scaffold_195	575801	575900	chrUn_5	1.03967	0.441593	5	island	-67	GSONMT00070575001	NR5A2_HUMAN	Nuclear receptor subfamily 5 group A member 2	0	.
scaffold_1954	100301	100400	chrUn	1.29882	5.94873	9	open sea	0	GSONMT00035556001	HXDCA_DANRE	Homeobox protein Hox-D12a	5e-109	.
scaffold_1959	109101	109200	chrUn	2.00229	1.85742	11	shore	0	GSONMT00011475001	HXA9_MORSA	Homeobox protein Hox-A9	3e-147	.
scaffold_1959	109201	109300	chrUn	1.13341	0.860944	4	shore	0	GSONMT00011475001	HXA9_MORSA	Homeobox protein Hox-A9	3e-147	.
scaffold_1959	123601	123700	chrUn	0.389119	0.982592	11	island	0	GSONMT00011477001	HXABA_TAKRU	Homeobox protein Hox-A11a	5e-140	.
scaffold_196	714001	714100	chrUn_10	2.40828	5.04597	10	island	0	GSONMT00070617001	HELT_DANRE	Hairy and enhancer of split-related protein helt	7e-127	.
scaffold_196	714101	714200	chrUn_10	1.77967	0.640573	7	island	0	GSONMT00070617001	HELT_DANRE	Hairy and enhancer of split-related protein helt	7e-127	.
scaffold_19666	5501	5600	chrUn_16	0.75452	0.565567	7	island	.	.		.	.	.
scaffold_19720	2301	2400	chrUn	1.02243	0.513991	5	shore	.	.		.	.	.
scaffold_1975	101801	101900	chrUn	1.01041	4.96589	7	island	0	GSONMT00013959001	CCNO_HUMAN	Cyclin-O	4e-59	.
scaffold_1975	101901	102000	chrUn	0.467994	3.14047	7	island	0	GSONMT00013959001	CCNO_HUMAN	Cyclin-O	4e-59	.
scaffold_1975	102201	102300	chrUn	0.878638	4.66552	6	island	-236	GSONMT00013959001	CCNO_HUMAN	Cyclin-O	4e-59	.
scaffold_1978	5601	5700	chrUn	1.16513	5.15474	8	island	.	.		.	.	.
scaffold_198	679301	679400	chrUn_8	0.385489	1.73393	8	shelf	0	GSONMT00070713001	PTHD1_DANRE	Patched domain-containing protein 1	0	.
scaffold_19939	901	1000	chrUn	0.313376	0.441168	4	open sea	.	.		.	.	.
scaffold_1994	10801	10900	chrUn	0.469232	2.82192	7	island	0	GSONMT00030905001	IFFO1_MOUSE	Intermediate filament family orphan 1	6e-69	.
scaffold_2	2177401	2177500	chr_15	0.384299	0.332839	3	shore	0	GSONMT00070862001	MNX1_MOUSE	Motor neuron and pancreas homeobox protein 1	3e-70	.
scaffold_201	111501	111600	chrUn_6	2.4326	2.66575	9	open sea	0	GSONMT00071084001	UB2Q2_HUMAN	Ubiquitin-conjugating enzyme E2 Q2	0	.
scaffold_20165	2001	2100	chrUn	0.0628931	0	4	open sea	0	GSONMT00033460001	RN139_MOUSE	E3 ubiquitin-protein ligase RNF139	0	.
scaffold_20165	2101	2200	chrUn	0.168087	0.313139	6	open sea	0	GSONMT00033460001	RN139_MOUSE	E3 ubiquitin-protein ligase RNF139	0	.
scaffold_2023	105601	105700	chrUn	0.102902	0.450853	7	open sea	0	GSONMT00050233001	ODPA_HUMAN	Pyruvate dehydrogenase E1 component subunit alpha, somatic form, mitochondrial	0	.
scaffold_2025	33001	33100	chrUn_3	2.43944	0.365412	9	island	-6250	GSONMT00007921001	CBL_MOUSE	E3 ubiquitin-protein ligase CBL	0	.
scaffold_2025	33201	33300	chrUn_3	0.254865	0.160443	5	island	-6450	GSONMT00007921001	CBL_MOUSE	E3 ubiquitin-protein ligase CBL	0	.
scaffold_2025	33401	33500	chrUn_3	0.349928	0.394939	4	island	-6650	GSONMT00007921001	CBL_MOUSE	E3 ubiquitin-protein ligase CBL	0	.
scaffold_2026	34301	34400	chrUn_9	0.441094	2.85522	6	shore	0	GSONMT00032652001	HXCCA_TAKRU	Homeobox protein Hox-C12a	7e-123	.
scaffold_2026	47701	47800	chrUn_9	0.436278	0.84047	6	island	0	GSONMT00032653001	HXCBA_DANRE	Homeobox protein Hox-C11a	0	.
scaffold_20389	6101	6200	chrUn	0.416886	4.84852	4	shore	.	.		.	.	.
scaffold_20389	7301	7400	chrUn	0.518387	0.350058	8	island	.	.		.	.	.
scaffold_20439	1101	1200	chrUn	0.801526	1.10383	9	island	.	.		.	.	.
scaffold_2045	37001	37100	chrUn	1.02094	2.64162	8	shore	0	GSONMT00038594001	ACTC_RAT	Actin, alpha cardiac muscle 1	0	.
scaffold_2048	95001	95100	chrUn	0.601051	0.803307	9	island	0	GSONMT00061771001	LONM_HUMAN	Lon protease homolog, mitochondrial	0	.
scaffold_205	127201	127300	chrUn_13	0.0508518	0.360359	9	open sea	0	GSONMT00071242001	SORC1_HUMAN	VPS10 domain-containing receptor SorCS1	0	.
scaffold_205	1240401	1240500	chrUn_13	1.06894	3.79288	9	island	0	GSONMT00071255001		.	.	.
scaffold_2057	27001	27100	chrUn_14	0.304404	0.964152	4	open sea	.	.		.	.	.
scaffold_2058	72301	72400	chrUn	0.17525	0.935835	3	shore	0	GSONMT00011391001	PCD18_HUMAN	Protocadherin-18	0	.
scaffold_2067	54501	54600	chrUn	0.583279	8.17185	8	island	.	.		.	.	.
scaffold_2067	54601	54700	chrUn	0.577304	1.86386	8	island	.	.		.	.	.
scaffold_2067	60601	60700	chrUn	1.42597	8.10065	8	island	.	.		.	.	.
scaffold_207	1084101	1084200	chrUn_19	0.822164	1.03197	8	shore	0	GSONMT00071353001	CRIM1_DANRE	Cysteine-rich motor neuron 1 protein	5e-81	.
scaffold_2071	5701	5800	chrUn	1.29989	4.44012	4	open sea	0	GSONMT00058730001	BRN3_CHICK	Brain-specific homeobox/POU domain protein 3	1e-168	.
scaffold_2071	6401	6500	chrUn	0.266738	4.27243	6	open sea	0	GSONMT00058730001	BRN3_CHICK	Brain-specific homeobox/POU domain protein 3	1e-168	.
scaffold_2071	17301	17400	chrUn	0.207925	0.524695	6	open sea	.	.		.	.	.
scaffold_2072	74501	74600	chrUn_5	0.189337	0.355808	8	island	0	GSONMT00003907001	PURB_DANRE	Transcriptional activator protein Pur-beta	2e-138	.
scaffold_2072	116701	116800	chrUn_5	0.616078	1.20955	9	shore	0	GSONMT00003911001	CNNM2_HUMAN	Metal transporter CNNM2	6e-159	.
scaffold_20903	7001	7100	chrUn	0.673273	1.37501	8	island	0	GSONMT00001392001	LRAT_HUMAN	Lecithin retinol acyltransferase	2e-70	.
scaffold_20917	6901	7000	chrUn	1.17365	4.22784	4	open sea	.	.		.	.	.
scaffold_2094	46301	46400	chrUn_2	0.255614	0.526339	7	open sea	3260	GSONMT00061124001	IQGA3_HUMAN	Ras GTPase-activating-like protein IQGAP3	0	.
scaffold_210	165401	165500	chrUn_6	0.265012	0.933381	8	island	0	GSONMT00071625001	PDE4D_RAT	cAMP-specific 3',5'-cyclic phosphodiesterase 4D	1e-16	.
scaffold_210	165501	165600	chrUn_6	0.18315	0.655357	6	island	0	GSONMT00071625001	PDE4D_RAT	cAMP-specific 3',5'-cyclic phosphodiesterase 4D	1e-16	.
scaffold_211	1062801	1062900	chrUn_4	1.99242	2.3119	10	island	0	GSONMT00071735001	TRIM9_BOVIN	E3 ubiquitin-protein ligase TRIM9	0	.
scaffold_211	1062901	1063000	chrUn_4	0.866267	0.536796	7	island	0	GSONMT00071735001	TRIM9_BOVIN	E3 ubiquitin-protein ligase TRIM9	0	.
scaffold_211	1063101	1063200	chrUn_4	2.74065	1.53236	8	island	0	GSONMT00071735001	TRIM9_BOVIN	E3 ubiquitin-protein ligase TRIM9	0	.
scaffold_2112	82801	82900	chrUn	3.42957	11.5257	8	island	.	.		.	.	.
scaffold_2112	82901	83000	chrUn	0.402105	6.31375	5	island	.	.		.	.	.
scaffold_2112	83001	83100	chrUn	0.170234	1.71652	5	island	.	.		.	.	.
scaffold_2118	39201	39300	chrUn	0.0565931	0.502259	5	island	0	GSONMT00011290001	FOXF1_DANRE	Forkhead box protein F1	0	.
scaffold_2118	39301	39400	chrUn	0.433949	0.979842	4	island	0	GSONMT00011290001	FOXF1_DANRE	Forkhead box protein F1	0	.
scaffold_21355	1501	1600	chrUn	0.868181	2.16047	10	open sea	0	GSONMT00006857001	T178B_DANRE	Transmembrane protein 178B	3e-45	.
scaffold_21355	1601	1700	chrUn	0.989521	4.79461	4	open sea	0	GSONMT00006857001	T178B_DANRE	Transmembrane protein 178B	3e-45	.
scaffold_215	138701	138800	chrUn_3	0.213199	1.69755	5	shore	-495	GSONMT00071907001	FA46A_HUMAN	Protein FAM46A	0	.
scaffold_2175	17701	17800	chrUn	0.580851	0.950587	6	island	.	.		.	.	.
scaffold_21755	5401	5500	chrUn	0.631085	0.478881	10	island	-43	GSONMT00035299001		.	.	.
scaffold_21810	3001	3100	chrUn	0.558258	0.123298	9	island	.	.		.	.	.
scaffold_21810	3101	3200	chrUn	1.20687	0	4	shore	.	.		.	.	.
scaffold_21814	6201	6300	chrUn	0.16335	1.37862	4	island	0	GSONMT00045411001	NMD3A_RAT	Glutamate receptor ionotropic, NMDA 3A	2e-45	.
scaffold_21814	6301	6400	chrUn	0.61188	1.22874	8	island	0	GSONMT00045411001	NMD3A_RAT	Glutamate receptor ionotropic, NMDA 3A	2e-45	.
scaffold_21814	6501	6600	chrUn	0.222954	3.79737	5	island	0	GSONMT00045411001	NMD3A_RAT	Glutamate receptor ionotropic, NMDA 3A	2e-45	.
scaffold_2195	95601	95700	chrUn	0.108123	1.80627	8	island	0	GSONMT00061407001	PCD10_HUMAN	Protocadherin-10	0	.
scaffold_21954	2601	2700	chrUn	0.494037	0.94263	6	open sea	.	.		.	.	.
scaffold_22	1217101	1217200	chrUn_4	0.168447	5.35185	6	shelf	0	GSONMT00072184001	CLVS2_DANRE	Clavesin-2	0	.
scaffold_22028	1801	1900	chrUn	0.198406	0.405239	7	island	0	GSONMT00013561001	DJC30_MOUSE	DnaJ homolog subfamily C member 30	2e-31	.
scaffold_22146	3401	3500	chrUn	0.764228	0.815157	6	shore	0	GSONMT00040625001	SOX9B_XENLA	Transcription factor Sox-9-B	0	.
scaffold_22146	3501	3600	chrUn	0.554205	0.695066	6	shore	0	GSONMT00040625001	SOX9B_XENLA	Transcription factor Sox-9-B	0	.
scaffold_22187	3401	3500	chrUn	0.18797	0.0409836	8	shore	-111	GSONMT00039046001	SEC63_MOUSE	Translocation protein SEC63 homolog	4e-23	.
scaffold_222	559401	559500	chrUn	0.62004	7.58263	5	shelf	0	GSONMT00072356001	OSR1_DANRE	Protein odd-skipped-related 1	9e-146	.
scaffold_2220	48101	48200	chrUn	0.504202	0.181369	4	open sea	0	GSONMT00035502001	PTPA_BOVIN	Serine/threonine-protein phosphatase 2A activator	0	.
scaffold_2221	73801	73900	chrUn	3.18722	3.93253	6	shore	9843	GSONMT00026086001	MED18_DANRE	Mediator of RNA polymerase II transcription subunit 18	9e-132	.
scaffold_223	418201	418300	chrUn_5	0.584815	4.30362	6	island	0	GSONMT00072394001	GPR88_HUMAN	Probable G-protein coupled receptor 88	1e-44	.
scaffold_223	418301	418400	chrUn_5	0.254898	1.02215	5	island	0	GSONMT00072394001	GPR88_HUMAN	Probable G-protein coupled receptor 88	1e-44	.
scaffold_2249	11801	11900	chrUn	0.0701754	2.65626	7	shore	0	GSONMT00026305001	CELR1_MOUSE	Cadherin EGF LAG seven-pass G-type receptor 1	0	.
scaffold_2250	41001	41100	chrUn	0.499331	0.431828	7	island	-7223	GSONMT00022888001	ZNRF2_DANRE	E3 ubiquitin-protein ligase ZNRF2	6e-59	.
scaffold_228	331401	331500	chrUn	0.218424	0.793835	8	island	0	GSONMT00072628001	RL19_XENLA	60S ribosomal protein L19	1e-83	.
scaffold_228	506601	506700	chrUn	0.726444	0.487586	5	shore	0	GSONMT00072646001	SFPQ_MOUSE	Splicing factor, proline- and glutamine-rich	3e-151	.
scaffold_228	506801	506900	chrUn	1.47854	0.390186	8	island	0	GSONMT00072646001	SFPQ_MOUSE	Splicing factor, proline- and glutamine-rich	3e-151	.
scaffold_2282	1701	1800	chrUn	0.463635	0.778932	10	island	.	.		.	.	.
scaffold_22880	3301	3400	chrUn	2.48459	3.67557	5	island	-451	GSONMT00032161001	HMBX1_HUMAN	Homeobox-containing protein 1	9e-11	.
scaffold_23	197201	197300	chrUn_Sex	0.257245	0.266069	12	island	0	GSONMT00072732001	BTBD2_HUMAN	BTB/POZ domain-containing protein 2	0	.
scaffold_23	476601	476700	chrUn_Sex	0.217577	5.32452	4	island	0	GSONMT00072746001	ONEC2_MOUSE	One cut domain family member 2	2e-73	.
scaffold_23	1164801	1164900	chrUn_Sex	0.176057	0.744521	8	island	0	GSONMT00072771001	PE2R4_RABIT	Prostaglandin E2 receptor EP4 subtype	4e-156	.
scaffold_23	1852401	1852500	chrUn_Sex	0.827367	0.931522	7	open sea	0	GSONMT00072788001	NOE1_CHICK	Noelin	0	.
scaffold_23049	2101	2200	chrUn	1.25403	2.77305	9	island	0	GSONMT00009622001	HCN4_HUMAN	Potassium/sodium hyperpolarization-activated cyclic nucleotide-gated channel 4	2e-34	.
scaffold_231	822301	822400	chrUn_2	0.461796	0.0646915	6	island	0	GSONMT00072876001	GPN2_DANRE	GPN-loop GTPase 2	3e-22	.
scaffold_2315	4301	4400	chrUn	0.0341006	0.274577	7	open sea	6314	GSONMT00035939001	ZN250_MOUSE	Zinc finger protein 250	1e-54	.
scaffold_232	313101	313200	chrUn_17	0.554269	0.45007	6	island	0	GSONMT00072902001	BPTF_HUMAN	Nucleosome-remodeling factor subunit BPTF	6e-146	.
scaffold_2323	23001	23100	chrUn	0	0.580643	6	shore	0	GSONMT00013545001	TBAT_ONCMY	Tubulin alpha chain, testis-specific	5e-163	.
scaffold_2323	23101	23200	chrUn	0	0.435213	4	shore	0	GSONMT00013545001	TBAT_ONCMY	Tubulin alpha chain, testis-specific	5e-163	.
scaffold_23326	3401	3500	chrUn	1.78913	0.276912	8	island	.	.		.	.	.
scaffold_2335	80301	80400	chrUn	0.735936	0.391997	6	island	0	GSONMT00004664001	ANM6_DANRE	Protein arginine N-methyltransferase 6	0	.
scaffold_23531	2501	2600	chrUn	0.278382	0.979758	8	island	.	.		.	.	.
scaffold_2365	86201	86300	chrUn_14	0.399245	1.49897	9	open sea	-141	GSONMT00023496001	EF1G_CARAU	Elongation factor 1-gamma	2e-45	.
scaffold_2380	70201	70300	chrUn_9	0.522335	0.409242	6	open sea	0	GSONMT00033512001	HUWE1_HUMAN	E3 ubiquitin-protein ligase HUWE1	0	.
scaffold_2380	70301	70400	chrUn_9	0.131602	0.311289	5	open sea	0	GSONMT00033512001	HUWE1_HUMAN	E3 ubiquitin-protein ligase HUWE1	0	.
scaffold_2386	26301	26400	chrUn	2.18352	11.1699	9	island	7565	GSONMT00024222001	CX6B1_MOUSE	Cytochrome c oxidase subunit 6B1	2e-42	.
scaffold_2407	90501	90600	chrUn	1.60116	3.4994	7	island	0	GSONMT00034142001	SOX1A_DANRE	Transcription factor Sox-1a	2e-131	.
scaffold_2407	90601	90700	chrUn	1.73559	3.09617	10	island	0	GSONMT00034142001	SOX1A_DANRE	Transcription factor Sox-1a	2e-131	.
scaffold_24074	2001	2100	chrUn	0.379602	0	6	shore	.	.		.	.	.
scaffold_2419	7201	7300	chrUn	1.19197	10.511	9	island	2141	GSONMT00044140001	FXD5A_XENLA	Forkhead box protein D5-A	6e-72	.
scaffold_2424	66001	66100	chrUn	0.854488	1.92879	5	island	0	GSONMT00004494001	TAF4_HUMAN	Transcription initiation factor TFIID subunit 4	9e-99	.
scaffold_2437	64401	64500	chrUn	0.354306	0.699254	3	open sea	.	.		.	.	.
scaffold_244	312001	312100	chrUn_12	0.747648	3.72219	7	island	1416	GSONMT00073507001	HXB9A_DANRE	Homeobox protein Hox-B9a	9e-144	.
scaffold_244	319601	319700	chrUn_12	0.339863	0.948409	11	island	0	GSONMT00073507001	HXB9A_DANRE	Homeobox protein Hox-B9a	9e-144	.
scaffold_244	319701	319800	chrUn_12	0.553747	0.710586	3	island	0	GSONMT00073507001	HXB9A_DANRE	Homeobox protein Hox-B9a	9e-144	.
scaffold_244	349501	349600	chrUn_12	1.1492	3.23328	7	shore	0	GSONMT00073512001	HXBDA_DANRE	Homeobox protein Hox-B13a	2e-97	.
scaffold_244	1144701	1144800	chrUn_12	0.971065	1.72006	11	island	0	GSONMT00073576001	SOCS7_HUMAN	Suppressor of cytokine signaling 7	1e-10	.
scaffold_2444	77201	77300	chrUn	0.416941	3.46323	7	island	0	GSONMT00035611001	S22A2_MOUSE	Solute carrier family 22 member 2	1e-89	.
scaffold_245	196901	197000	chr_6	0.16503	0.269069	6	island	0	GSONMT00073593001	RNF10_MOUSE	RING finger protein 10	0	.
scaffold_2451	15201	15300	chrUn	0.600201	0.380012	8	open sea	0	GSONMT00042475001	TAF5_HUMAN	Transcription initiation factor TFIID subunit 5	0	.
scaffold_24654	4301	4400	chrUn	0.521904	0.307343	4	open sea	.	.		.	.	.
scaffold_2466	15901	16000	chrUn	0.626929	1.3968	6	island	0	GSONMT00001978001	AINX_HUMAN	Alpha-internexin	3e-167	.
scaffold_247	582101	582200	chrUn_9	0.11646	0.115026	7	open sea	0	GSONMT00073741001	CQ10A_XENLA	Coenzyme Q-binding protein COQ10 homolog A, mitochondrial	7e-116	.
scaffold_247	1101501	1101600	chrUn_9	0.210084	0.345395	5	island	0	GSONMT00073775001	CEBPB_CHICK	CCAAT/enhancer-binding protein beta	8e-36	.
scaffold_247	1137601	1137700	chrUn_9	0.191732	0.136925	8	shore	0	GSONMT00073777001	PTN1_CHICK	Tyrosine-protein phosphatase non-receptor type 1	3e-176	.
scaffold_2496	24801	24900	chrUn	0.284634	0.534701	7	shore	.	.		.	.	.
scaffold_25	27201	27300	chrUn_19	0.603067	0.80651	6	open sea	.	.		.	.	.
scaffold_25	2421001	2421100	chrUn_19	0.374544	0.240385	3	open sea	0	GSONMT00074069001		.	.	.
scaffold_2501	26601	26700	chrUn	0.344294	0.425948	5	open sea	-835	GSONMT00061539001	LHX1_DANRE	LIM/homeobox protein Lhx1	0	.
scaffold_2501	26701	26800	chrUn	0.545396	1.03277	4	shelf	-735	GSONMT00061539001	LHX1_DANRE	LIM/homeobox protein Lhx1	0	.
scaffold_2506	8001	8100	chrUn	0.302733	0.368613	9	island	0	GSONMT00033218001	UR2R_RAT	Urotensin-2 receptor	6e-103	.
scaffold_25189	3701	3800	chrUn	0.6485	5.09491	8	open sea	0	GSONMT00019343001	LRAT_BOVIN	Lecithin retinol acyltransferase	3e-62	.
scaffold_253	305701	305800	chrUn_1	0.0833333	0.465247	8	island	0	GSONMT00074230001	FOXG1_XENLA	Forkhead box protein G1	1e-89	.
scaffold_253	305801	305900	chrUn_1	0.887503	1.08463	6	island	0	GSONMT00074230001	FOXG1_XENLA	Forkhead box protein G1	1e-89	.
scaffold_253	306101	306200	chrUn_1	1.67241	1.29384	11	island	0	GSONMT00074230001	FOXG1_XENLA	Forkhead box protein G1	1e-89	.
scaffold_2539	22501	22600	chrUn	0.25974	1.01278	9	shore	0	GSONMT00046802001	NHRF1_RABIT	Na(+)/H(+) exchange regulatory cofactor NHE-RF1	2e-91	.
scaffold_254	200001	200100	chrUn_11	1.1828	1.88968	5	island	0	GSONMT00074278001	ATOH1_PANTR	Protein atonal homolog 1	3e-49	.
scaffold_2548	72901	73000	chrUn	0.223423	11.1364	7	shelf	0	GSONMT00030585001	ZIC4_XENLA	Zinc finger protein ZIC 4	2e-108	.
scaffold_2548	73201	73300	chrUn	0.930444	1.48344	5	shelf	0	GSONMT00030586001		.	.	.
scaffold_2548	82701	82800	chrUn	0.545537	6.54555	3	open sea	0	GSONMT00030587001	ZIC3_HUMAN	Zinc finger protein ZIC 3	0	.
scaffold_2575	40601	40700	chrUn_14	0.0766284	0.181651	4	open sea	0	GSONMT00006975001	ERF1_XENLA	Eukaryotic peptide chain release factor subunit 1	0	.
scaffold_2580	83901	84000	chrUn	0.391534	0.262373	7	island	0	GSONMT00058428001		.	.	.
scaffold_2580	84001	84100	chrUn	0.4049	0.905147	10	island	0	GSONMT00058428001		.	.	.
scaffold_26	431901	432000	chrUn_22	0.882425	6.22563	6	shore	0	GSONMT00074540001	TBR1_MOUSE	T-box brain protein 1	0	.
scaffold_26	432001	432100	chrUn_22	0.377725	5.54324	9	island	0	GSONMT00074540001	TBR1_MOUSE	T-box brain protein 1	0	.
scaffold_26	547601	547700	chrUn_22	0.55309	0.0277778	2	shelf	0	GSONMT00074546001	IFIH1_MOUSE	Interferon-induced helicase C domain-containing protein 1	0	.
scaffold_26	547701	547800	chrUn_22	0.2797	0.192308	2	shelf	0	GSONMT00074546001	IFIH1_MOUSE	Interferon-induced helicase C domain-containing protein 1	0	.
scaffold_26	2380101	2380200	chrUn_22	0	8.4488	4	open sea	0	GSONMT00074623001	SP9_DANRE	Transcription factor Sp9	0	.
scaffold_26170	501	600	chrUn	0.518827	0.701925	9	island	0	GSONMT00057594001	MAN1_HUMAN	Inner nuclear membrane protein Man1	3e-12	.
scaffold_26170	601	700	chrUn	1.57791	3.27067	9	island	0	GSONMT00057594001	MAN1_HUMAN	Inner nuclear membrane protein Man1	3e-12	.
scaffold_26170	1001	1100	chrUn	0.689075	0.424307	5	island	0	GSONMT00057594001	MAN1_HUMAN	Inner nuclear membrane protein Man1	3e-12	.
scaffold_26170	1101	1200	chrUn	0.53502	0.0434699	13	island	0	GSONMT00057594001	MAN1_HUMAN	Inner nuclear membrane protein Man1	3e-12	.
scaffold_26170	1301	1400	chrUn	1.69811	0.550918	8	island	0	GSONMT00057594001	MAN1_HUMAN	Inner nuclear membrane protein Man1	3e-12	.
scaffold_26170	1401	1500	chrUn	1.3953	0.962227	11	island	0	GSONMT00057594001	MAN1_HUMAN	Inner nuclear membrane protein Man1	3e-12	.
scaffold_2630	21801	21900	chrUn	0.327193	0.41483	7	shore	-1195	GSONMT00062449001	MPPD2_HUMAN	Metallophosphoesterase MPPED2	0	.
scaffold_26370	1001	1100	chrUn	0.147059	0.123457	4	open sea	0	GSONMT00034352001	ZSA5B_HUMAN	Zinc finger and SCAN domain-containing protein 5B	2e-25	.
scaffold_2650	41701	41800	chrUn	0.0967251	1.98244	6	shore	0	GSONMT00009035001	NDF2_DANRE	Neurogenic differentiation factor 2	3e-134	.
scaffold_266	465301	465400	chrUn_6	0.536496	0.0578369	9	open sea	0	GSONMT00074904001	BCL7A_DANRE	B-cell CLL/lymphoma 7 protein family member A	9e-65	.
scaffold_266	465401	465500	chrUn_6	0.174658	0.0897364	5	open sea	0	GSONMT00074904001	BCL7A_DANRE	B-cell CLL/lymphoma 7 protein family member A	9e-65	.
scaffold_2660	16001	16100	chrUn	0.12048	0.0741049	6	open sea	0	GSONMT00057785001	ERLEC_XENTR	Endoplasmic reticulum lectin 1	0	.
scaffold_2664	53801	53900	chrUn_6	0.803423	1.19845	6	shelf	5589	GSONMT00011686001	PTAR1_DANRE	Protein prenyltransferase alpha subunit repeat-containing protein 1	1e-56	.
scaffold_267	809001	809100	chrUn_6	0.180995	5.04764	5	shore	5042	GSONMT00074957001	US6NL_MOUSE	USP6 N-terminal-like protein	4e-109	.
scaffold_2675	29401	29500	chrUn	0.308517	2.42074	9	island	0	GSONMT00054682001	METRL_RAT	Meteorin-like protein	5e-88	.
scaffold_2675	75201	75300	chrUn	0.714363	4.95825	5	shore	.	.		.	.	.
scaffold_2675	75301	75400	chrUn	0.203498	1.96515	6	shore	.	.		.	.	.
scaffold_268	524301	524400	chrUn_29	2.4858	2.59005	8	island	0	GSONMT00074995001	I2BPL_MOUSE	Interferon regulatory factor 2-binding protein-like	0	.
scaffold_2689	75401	75500	chrUn_3	0.128205	0.226209	2	island	.	.		.	.	ID=RM1189328;Name=RM1189328;Note=Motif:hAT-N36B_DR
scaffold_2689	75501	75600	chrUn_3	2.08663	2.00277	6	island	.	.		.	.	.
scaffold_269	856701	856800	chrUn_20	0.333962	1.9969	4	shore	0	GSONMT00075050001	OLIG3_HUMAN	Oligodendrocyte transcription factor 3	2e-88	.
scaffold_269	856801	856900	chrUn_20	0.920933	2.17237	8	island	0	GSONMT00075050001	OLIG3_HUMAN	Oligodendrocyte transcription factor 3	2e-88	.
scaffold_2697	15901	16000	chrUn_8	0.34428	4.77746	10	island	0	GSONMT00004759001	LRFN5_MOUSE	Leucine-rich repeat and fibronectin type-III domain-containing protein 5	0	.
scaffold_2707	10001	10100	chrUn_18	1.40031	1.15364	8	island	4874	GSONMT00015337001	PUM1_MOUSE	Pumilio homolog 1	0	.
scaffold_2710	53301	53400	chrUn	0.417083	1.00784	6	island	0	GSONMT00045648001	HCN4_RABIT	Potassium/sodium hyperpolarization-activated cyclic nucleotide-gated channel 4	4e-40	.
scaffold_2710	53401	53500	chrUn	0.516939	2.00784	8	island	0	GSONMT00045648001	HCN4_RABIT	Potassium/sodium hyperpolarization-activated cyclic nucleotide-gated channel 4	4e-40	.
scaffold_27147	2501	2600	chrUn	0.407138	3.75422	14	island	.	.		.	.	.
scaffold_2728	46701	46800	chrUn	0.255017	0.50403	7	open sea	-64	GSONMT00019845001	ZCH24_MACFA	Zinc finger CCHC domain-containing protein 24	6e-51	.
scaffold_2730	79501	79600	chrUn	0.723059	1.23774	7	shore	0	GSONMT00029021001	RL3R1_MOUSE	Relaxin-3 receptor 1	7e-132	.
scaffold_2730	80501	80600	chrUn	0.432717	4.40071	6	island	0	GSONMT00029021001	RL3R1_MOUSE	Relaxin-3 receptor 1	7e-132	.
scaffold_2740	7001	7100	chrUn	0.822913	1.55285	6	island	0	GSONMT00015767001	ONEC3_HUMAN	One cut domain family member 3	8e-83	.
scaffold_2740	7301	7400	chrUn	0.115357	2.39648	4	island	0	GSONMT00015767001	ONEC3_HUMAN	One cut domain family member 3	8e-83	.
scaffold_2740	7501	7600	chrUn	0.240559	1.95068	8	island	0	GSONMT00015767001	ONEC3_HUMAN	One cut domain family member 3	8e-83	.
scaffold_2745	56501	56600	chrUn	0.387511	0.374767	6	island	0	GSONMT00035018001	ESM1_RAT	Endothelial cell-specific molecule 1	1e-40	.
scaffold_27486	2001	2100	chrUn	0.685496	0.341216	4	open sea	.	.		.	.	.
scaffold_27486	2101	2200	chrUn	0.277526	0.252837	7	open sea	.	.		.	.	.
scaffold_2763	49401	49500	chrUn	0.676746	3.10978	6	island	0	GSONMT00001486001	SPIR2_HUMAN	Protein spire homolog 2	0	.
scaffold_2763	71701	71800	chrUn	0.269336	0.192668	11	island	0	GSONMT00001488001	SNTB2_MOUSE	Beta-2-syntrophin	2e-57	.
scaffold_27656	2101	2200	chrUn	0.454473	1.38421	5	shore	0	GSONMT00042395001	FOXA2_ORYLA	Hepatocyte nuclear factor 3-beta	0	.
scaffold_27656	2601	2700	chrUn	0.218941	4.09677	3	shore	0	GSONMT00042395001	FOXA2_ORYLA	Hepatocyte nuclear factor 3-beta	0	.
scaffold_27789	2301	2400	chrUn	0.550361	2.25231	6	open sea	0	GSONMT00063814001	H6ST3_DANRE	Heparan-sulfate 6-O-sulfotransferase 3	2e-86	.
scaffold_278	157701	157800	chrUn_1	0.106872	0.802624	6	shore	0	GSONMT00075578001	CCDC6_HUMAN	Coiled-coil domain-containing protein 6	0	.
scaffold_278	157801	157900	chrUn_1	1.07554	0.226518	4	shore	0	GSONMT00075578001	CCDC6_HUMAN	Coiled-coil domain-containing protein 6	0	.
scaffold_28	1941001	1941100	chrUn_1	0.595336	1.07034	5	island	0	GSONMT00075718001	FA43A_HUMAN	Protein FAM43A	5e-163	.
scaffold_280	569901	570000	chr_19	0.40404	0.494892	4	open sea	0	GSONMT00075780001	TMED8_MOUSE	Protein TMED8	1e-66	.
scaffold_28030	3701	3800	chrUn	0.246112	0.661324	10	island	0	GSONMT00051710001	GIPC1_RAT	PDZ domain-containing protein GIPC1	3e-25	.
scaffold_28030	4001	4100	chrUn	0	0.752165	5	shore	-107	GSONMT00051710001	GIPC1_RAT	PDZ domain-containing protein GIPC1	3e-25	.
scaffold_282	235801	235900	chrUn_17	1.48167	2.01851	5	island	-6192	GSONMT00075848001	VHL_MOUSE	Von Hippel-Lindau disease tumor suppressor	3e-54	.
scaffold_282	604701	604800	chrUn_17	0.688248	3.4496	7	shelf	0	GSONMT00075865001	B4GN1_HUMAN	Beta-1,4 N-acetylgalactosaminyltransferase 1	0	.
scaffold_283	587801	587900	chrUn_16	0.962846	0.760458	8	island	0	GSONMT00075913001	KCNQ5_HUMAN	Potassium voltage-gated channel subfamily KQT member 5	2e-27	.
scaffold_28318	2301	2400	chrUn	0.294445	3.36638	7	island	.	.		.	.	.
scaffold_28318	2601	2700	chrUn	0.689754	2.1213	6	island	.	.		.	.	.
scaffold_284	229201	229300	chrUn_16	1.25987	0.29538	7	island	0	GSONMT00075927001	RIMKB_DANRE	Beta-citrylglutamate synthase B	2e-176	.
scaffold_284	1027801	1027900	chrUn_16	0.344284	0.748547	3	island	0	GSONMT00075961001	DEAF1_DROME	Deformed epidermal autoregulatory factor 1	4e-16	.
scaffold_284	1027901	1028000	chrUn_16	1.15452	0.659352	7	island	0	GSONMT00075961001	DEAF1_DROME	Deformed epidermal autoregulatory factor 1	4e-16	.
scaffold_2843	64301	64400	chrUn_18	1.8497	1.08356	6	island	0	GSONMT00019746001	EEPD1_DANRE	Endonuclease/exonuclease/phosphatase family domain-containing protein 1	5e-163	.
scaffold_2843	64401	64500	chrUn_18	0.699619	0.682116	7	island	0	GSONMT00019746001	EEPD1_DANRE	Endonuclease/exonuclease/phosphatase family domain-containing protein 1	5e-163	.
scaffold_2858	1301	1400	chrUn	0.137491	0.532149	6	island	0	GSONMT00033148001	PE2R4_RABIT	Prostaglandin E2 receptor EP4 subtype	2e-159	.
scaffold_2858	1601	1700	chrUn	1.41374	0.597493	7	island	0	GSONMT00033148001	PE2R4_RABIT	Prostaglandin E2 receptor EP4 subtype	2e-159	.
scaffold_2858	1801	1900	chrUn	0.316234	0.0952114	8	island	0	GSONMT00033148001	PE2R4_RABIT	Prostaglandin E2 receptor EP4 subtype	2e-159	.
scaffold_287	16801	16900	chrUn_17	4.95511	4.22024	8	island	0	GSONMT00076075001	P3H1_RAT	Prolyl 3-hydroxylase 1	4e-134	.
scaffold_291	179201	179300	chrUn_10	0.713468	6.7699	8	island	-226	GSONMT00076324001	EMSY_DANRE	Protein EMSY	0	.
scaffold_293	618801	618900	chrUn_12	0.859071	0.471418	7	island	-968	GSONMT00076387001	AIFM1_RAT	Apoptosis-inducing factor 1, mitochondrial	0	.
scaffold_2945	37201	37300	chrUn	0.471141	1.61541	7	open sea	-9830	GSONMT00039401001	G3ST2_MOUSE	Galactose-3-O-sulfotransferase 2	6e-107	.
scaffold_2957	59001	59100	chrUn_Sex	1.59553	0.755223	8	island	0	GSONMT00013668001	TPRN_MOUSE	Taperin	1e-15	.
scaffold_2958	29501	29600	chrUn	1.95315	2.33711	9	island	0	GSONMT00036938001	DMP4_MOUSE	Extracellular serine/threonine protein kinase FAM20C	3e-111	.
scaffold_297	509001	509100	chrUn_22	0.979144	6.53615	11	island	0	GSONMT00076477001	ZIC2_HUMAN	Zinc finger protein ZIC 2	0	.
scaffold_29970	2201	2300	chrUn	0.132375	1.99213	7	island	0	GSONMT00059611001	ANPRC_MOUSE	Atrial natriuretic peptide receptor 3	4e-67	.
scaffold_3	411301	411400	chr_19	0.21978	0.449116	5	island	0	GSONMT00076560001	DDHD1_BOVIN	Phospholipase DDHD1	3e-47	.
scaffold_3	2872001	2872100	chr_19	1.3837	3.01988	8	shore	0	GSONMT00076689001	SIX4_HUMAN	Homeobox protein SIX4	9e-149	.
scaffold_3	2884001	2884100	chr_19	0.625906	1.85882	6	island	-2099	GSONMT00076690001	SIX1B_DANRE	Homeobox protein six1b	0	.
scaffold_30373	2601	2700	chrUn	0.166439	0.0215332	12	island	0	GSONMT00049332001		.	.	.
scaffold_30373	2701	2800	chrUn	0.761712	0.0430293	5	island	0	GSONMT00049332001		.	.	.
scaffold_30477	2301	2400	chrUn	4.01305	4.5642	8	island	.	.		.	.	.
scaffold_3054	55901	56000	chrUn_12	0.556112	1.21047	1	shelf	.	.		.	.	ID=RM1272646;Name=RM1272646;Note=Motif:Gypsy80-I_DR-int
scaffold_3075	37701	37800	chrUn	0.57211	12.8616	6	open sea	-9177	GSONMT00046616001		.	.	.
scaffold_3075	37801	37900	chrUn	0.100533	2.28	5	open sea	-9077	GSONMT00046616001		.	.	.
scaffold_3075	37901	38000	chrUn	0.361743	10.4685	6	open sea	-8977	GSONMT00046616001		.	.	.
scaffold_3075	47101	47200	chrUn	0.809355	0.793934	12	island	0	GSONMT00046616001		.	.	.
scaffold_309	536301	536400	chrUn_7	0.101078	0.272965	5	open sea	0	GSONMT00049787001	CF106_DANRE	Uncharacterized protein C6orf106 homolog	0	.
scaffold_309	536401	536500	chrUn_7	0.252572	0.164377	6	open sea	0	GSONMT00049787001	CF106_DANRE	Uncharacterized protein C6orf106 homolog	0	.
scaffold_3096	40501	40600	chrUn	0.055371	1.43422	6	island	.	.		.	.	.
scaffold_31	383601	383700	chrUn_2	0.217236	0.942242	5	island	.	.		.	.	.
scaffold_3130	55601	55700	chrUn	0.502858	1.05119	2	shore	0	GSONMT00004662001	IRX1_XENTR	Iroquois-class homeodomain protein irx-1	1e-92	.
scaffold_3130	55701	55800	chrUn	0.448789	4.49632	6	island	0	GSONMT00004662001	IRX1_XENTR	Iroquois-class homeodomain protein irx-1	1e-92	.
scaffold_3136	44701	44800	chrUn	0.234313	0.0777008	7	open sea	.	.		.	.	.
scaffold_3136	44801	44900	chrUn	0.262275	1.49649	8	open sea	.	.		.	.	.
scaffold_314	643001	643100	chrUn_21	0.310415	2.36664	5	open sea	0	GSONMT00002198001	IAPP_CANFA	Islet amyloid polypeptide	2e-23	.
scaffold_3141	19401	19500	chrUn	1.06877	0.889842	7	island	.	.		.	.	.
scaffold_3169	33801	33900	chrUn	0.0550055	9.93722	8	open sea	0	GSONMT00035514001	CCNT1_BOVIN	Cyclin-T1	4e-167	.
scaffold_318	856501	856600	chrUn_7	0.548723	0.836115	7	shelf	-224	GSONMT00029060001	NAB1_HUMAN	NGFI-A-binding protein 1	0	.
scaffold_32	169001	169100	chrUn_28	0.55335	2.58732	8	island	0	GSONMT00077140001	JPH1_HUMAN	Junctophilin-1	0	.
scaffold_322	583001	583100	chrUn_27	0.687028	0.921949	4	open sea	0	GSONMT00028459001	BC7BB_DANRE	B-cell CLL/lymphoma 7 protein family member B-B	1e-72	.
scaffold_3250	62601	62700	chrUn_7	0.540356	0.733997	7	island	0	GSONMT00061003001	FLNB_MOUSE	Filamin-B	0	.
scaffold_3250	62801	62900	chrUn_7	1.05675	0.330275	6	island	0	GSONMT00061003001	FLNB_MOUSE	Filamin-B	0	.
scaffold_326	457301	457400	chr_28	0.637532	5.48221	8	open sea	-1421	GSONMT00034369001	PHOS_MOUSE	Phosducin	4e-90	.
scaffold_326	738301	738400	chr_28	0.512937	8.52494	8	shore	199	GSONMT00034382001	ARL14_HUMAN	ADP-ribosylation factor-like protein 14	1e-55	.
scaffold_3276	12001	12100	chrUn	0.5495	1.54244	8	open sea	0	GSONMT00033701001	C1QL2_HUMAN	Complement C1q-like protein 2	2e-103	.
scaffold_32878	3301	3400	chrUn	1.23291	2.24948	8	island	0	GSONMT00033907001	IQEC3_RAT	IQ motif and SEC7 domain-containing protein 3	9e-19	.
scaffold_3296	37501	37600	chrUn	0.50499	1.32671	4	open sea	0	GSONMT00018994001	NR4A2_BOVIN	Nuclear receptor subfamily 4 group A member 2	0	.
scaffold_33	548201	548300	chrUn_1	0.452277	14.6012	7	open sea	.	.		.	.	.
scaffold_3312	64601	64700	chrUn_6	1.59241	0.757249	2	island	0	GSONMT00035636001	PDCD7_MOUSE	Programmed cell death protein 7	2e-62	.
scaffold_3316	11001	11100	chrUn	0.166065	5.87157	11	island	0	GSONMT00057584001	PCDA2_HUMAN	Protocadherin alpha-2	0	.
scaffold_33199	2401	2500	chrUn	0.226048	1.3812	6	shore	.	.		.	.	.
scaffold_33261	3001	3100	chrUn	1.05703	0.482368	11	island	.	.		.	.	.
scaffold_33263	2301	2400	chrUn	0.822103	1.8078	11	island	.	.		.	.	.
scaffold_333	912401	912500	chrUn_18	0.052521	0.242261	4	open sea	0	GSONMT00044442001	TPM1_COTJA	Tropomyosin alpha-1 chain	8e-26	.
scaffold_336	507301	507400	chrUn_5	0.706736	0.14314	8	open sea	-1901	GSONMT00033369001	CE350_HUMAN	Centrosome-associated protein 350	0	.
scaffold_3361	35001	35100	chrUn_12	0.414488	0.109649	5	open sea	0	GSONMT00043449001	MLX_HUMAN	Max-like protein X	2e-126	.
scaffold_3371	54601	54700	chrUn	0.39977	1.2347	3	shelf	.	.		.	.	.
scaffold_3374	6301	6400	chrUn	0.871126	9.21377	9	island	0	GSONMT00026824001		.	.	.
scaffold_3374	6401	6500	chrUn	0.0355114	3.67765	6	island	0	GSONMT00026824001		.	.	.
scaffold_3374	26501	26600	chrUn	0.572124	2.6066	11	island	0	GSONMT00026827001	SOGA3_MOUSE	Protein SOGA3	1e-28	.
scaffold_3374	26801	26900	chrUn	1.5223	10.0583	8	island	0	GSONMT00026827001	SOGA3_MOUSE	Protein SOGA3	1e-28	.
scaffold_33772	3201	3300	chrUn	0.315593	3.34798	8	island	.	.		.	.	.
scaffold_33772	3301	3400	chrUn	0.699474	5.15751	8	island	.	.		.	.	.
scaffold_34030	2101	2200	chrUn	1.12353	6.18625	3	shore	0	GSONMT00060938001	EGR2B_DANRE	Early growth response protein 2b	0	.
scaffold_341	247901	248000	chrUn	0.258893	5.46	5	open sea	0	GSONMT00041011001	FOXF2_HUMAN	Forkhead box protein F2	9e-103	.
scaffold_341	248001	248100	chrUn	0.525663	7.89792	5	open sea	0	GSONMT00041011001	FOXF2_HUMAN	Forkhead box protein F2	9e-103	.
scaffold_341	248101	248200	chrUn	0.601183	8.26106	9	open sea	0	GSONMT00041011001	FOXF2_HUMAN	Forkhead box protein F2	9e-103	.
scaffold_341	255801	255900	chrUn	1.47108	1.49534	8	island	0	GSONMT00041013001	FOXQ1_RAT	Forkhead box protein Q1	7e-71	.
scaffold_341	572701	572800	chrUn	0.061345	0.0732891	5	shore	0	GSONMT00041027001	PHLP1_HUMAN	PH domain leucine-rich repeat-containing protein phosphatase 1	0	.
scaffold_341	572801	572900	chrUn	0.970973	0.371633	7	island	0	GSONMT00041027001	PHLP1_HUMAN	PH domain leucine-rich repeat-containing protein phosphatase 1	0	.
scaffold_341	694401	694500	chrUn	2.93707	2.77719	4	shore	0	GSONMT00041030001	ADCY1_MOUSE	Adenylate cyclase type 1	5e-73	.
scaffold_341	694501	694600	chrUn	0	4.85769	5	shore	0	GSONMT00041030001	ADCY1_MOUSE	Adenylate cyclase type 1	5e-73	.
scaffold_345	679701	679800	chrUn_Sex	0.289799	0.155281	8	open sea	0	GSONMT00036952001	AT2A2_PIG	Sarcoplasmic/endoplasmic reticulum calcium ATPase 2	0	.
scaffold_3455	41101	41200	chrUn_26	0.202063	2.9946	8	island	0	GSONMT00056972001	HCN4_HUMAN	Potassium/sodium hyperpolarization-activated cyclic nucleotide-gated channel 4	6e-54	.
scaffold_3455	41201	41300	chrUn_26	1.05624	3.56897	10	island	0	GSONMT00056972001	HCN4_HUMAN	Potassium/sodium hyperpolarization-activated cyclic nucleotide-gated channel 4	6e-54	.
scaffold_3456	12101	12200	chrUn	0.252845	0.703338	9	island	0	GSONMT00030752001	IRS2_MOUSE	Insulin receptor substrate 2	0	.
scaffold_3485	10701	10800	chrUn	0.239704	0.2486	5	island	-8450	GSONMT00005795001	HNRPU_MOUSE	Heterogeneous nuclear ribonucleoprotein U	1e-42	.
scaffold_3485	10801	10900	chrUn	0.775593	0.457289	5	island	-8350	GSONMT00005795001	HNRPU_MOUSE	Heterogeneous nuclear ribonucleoprotein U	1e-42	.
scaffold_349	115801	115900	chrUn_17	0.64689	2.85831	5	island	0	GSONMT00012283001	HXCDA_DANRE	Homeobox protein Hox-C13a	0	.
scaffold_349	115901	116000	chrUn_17	0.0925926	1.33472	5	island	0	GSONMT00012283001	HXCDA_DANRE	Homeobox protein Hox-C13a	0	.
scaffold_349	130701	130800	chrUn_17	0.1128	1.14102	7	island	0	GSONMT00012285001	HXCCA_TAKRU	Homeobox protein Hox-C12a	5e-136	.
scaffold_349	175301	175400	chrUn_17	1.54736	1.06972	3	open sea	0	GSONMT00012289001	HXC9_ORYLA	Homeobox protein Hox-C9	1e-136	.
scaffold_3498	5801	5900	chrUn	0.5539	2.37126	4	shore	0	GSONMT00043455001	NDF2_DANRE	Neurogenic differentiation factor 2	3e-126	.
scaffold_35087	1001	1100	chrUn	0.732183	2.37934	11	island	.	.		.	.	.
scaffold_35131	2401	2500	chrUn	0.196078	0.398853	5	shore	.	.		.	.	.
scaffold_35131	2501	2600	chrUn	0.0789578	0.116087	4	shore	.	.		.	.	.
scaffold_3516	40301	40400	chrUn	0.0676133	0.416455	7	island	.	.		.	.	.
scaffold_3516	40401	40500	chrUn	0.431538	3.43495	5	shore	.	.		.	.	.
scaffold_35409	1001	1100	chrUn	0.668029	1.37506	8	island	.	.		.	.	.
scaffold_359	237001	237100	chrUn_3	0.450857	0.339059	9	island	.	.		.	.	.
scaffold_359	883401	883500	chrUn_3	1.08163	1.82759	9	island	0	GSONMT00031429001	ZIC5_XENLA	Zinc finger protein ZIC 5	0	.
scaffold_359	885601	885700	chrUn_3	2.2115	2.32731	5	shore	0	GSONMT00031429001	ZIC5_XENLA	Zinc finger protein ZIC 5	0	.
scaffold_36	2079401	2079500	chrUn	0.328437	0.830997	4	shore	-32	GSONMT00077524001	GPR26_RAT	G-protein coupled receptor 26	4e-136	.
scaffold_36	2079501	2079600	chrUn	1.28194	2.6927	8	island	0	GSONMT00077524001	GPR26_RAT	G-protein coupled receptor 26	4e-136	.
scaffold_360	244101	244200	chrUn_8	0.263235	0.742697	4	shore	1402	GSONMT00063662001	VTC1A_DANRE	V-type proton ATPase subunit C 1-A	4e-68	.
scaffold_3600	20501	20600	chrUn	0.802306	2.62413	5	open sea	.	.		.	.	.
scaffold_362	651701	651800	chrUn_11	0.365954	2.11043	12	island	.	.		.	.	.
scaffold_36293	2101	2200	chrUn	0.929233	4.36526	6	open sea	.	.		.	.	.
scaffold_3670	8401	8500	chrUn	0.13564	2.18653	5	shore	0	GSONMT00003970001	LHX9_DANRE	LIM/homeobox protein Lhx9	0	.
scaffold_36700	1901	2000	chrUn	0.219328	0.270395	8	island	.	.		.	.	.
scaffold_36700	2001	2100	chrUn	0.640743	0.378925	9	island	.	.		.	.	.
scaffold_368	885001	885100	chrUn_10	1.26697	1.26027	8	open sea	.	.		.	.	.
scaffold_36835	1001	1100	chrUn	2.54173	2.77598	13	island	.	.		.	.	.
scaffold_36880	2201	2300	chrUn	0.210826	0.436628	8	island	.	.		.	.	.
scaffold_369	8901	9000	chrUn_24	0.933617	11.2851	2	shore	0	GSONMT00031645001	A2MG_PONAB	Alpha-2-macroglobulin	0	.
scaffold_369	566401	566500	chrUn_24	0.126984	2.16369	4	open sea	0	GSONMT00031674001	ATS15_MOUSE	A disintegrin and metalloproteinase with thrombospondin motifs 15	0	.
scaffold_37070	2501	2600	chrUn	0.430607	9.80366	6	open sea	.	.		.	.	.
scaffold_3737	14101	14200	chrUn	3.20961	0.652634	6	shore	-2380	GSONMT00042580001	NACC1_HUMAN	Nucleus accumbens-associated protein 1	5e-127	.
scaffold_3737	58901	59000	chrUn	0.735637	1.48379	5	shore	0	GSONMT00042583001	IER2_RAT	Immediate early response gene 2 protein	9e-15	.
scaffold_376	541701	541800	chrUn_14	0.580538	0.163962	9	island	0	GSONMT00006520001	STT3B_HUMAN	Dolichyl-diphosphooligosaccharide--protein glycosyltransferase subunit STT3B	0	.
scaffold_379	575601	575700	chrUn_Sex	0.57992	2.15668	7	shore	-270	GSONMT00007363001		.	.	.
scaffold_379	575701	575800	chrUn_Sex	0.534044	1.01719	3	shore	-170	GSONMT00007363001		.	.	.
scaffold_37967	901	1000	chrUn	0.224972	1.23922	5	island	.	.		.	.	.
scaffold_3798	40201	40300	chrUn_Sex	0.225076	0.266608	11	island	0	GSONMT00031708001	ZN703_XENTR	Zinc finger protein 703	5e-135	.
scaffold_38	1961301	1961400	chr_2	0.109514	0.709855	5	shore	.	.		.	.	.
scaffold_3810	4301	4400	chrUn	0.845784	0.578131	5	open sea	.	.		.	.	.
scaffold_38179	2301	2400	chrUn	0.521462	0.739017	6	island	.	.		.	.	.
scaffold_384	787901	788000	chrUn_9	0.321627	0.481657	9	island	1310	GSONMT00057067001	LKAM1_HUMAN	Protein LKAAEAR1	2e-14	.
scaffold_384	788001	788100	chrUn_9	1.02031	0.562457	9	island	1210	GSONMT00057067001	LKAM1_HUMAN	Protein LKAAEAR1	2e-14	.
scaffold_385	42701	42800	chrUn_11	0.732046	0.569728	9	island	.	.		.	.	.
scaffold_385	42801	42900	chrUn_11	0.878492	0.093798	7	island	.	.		.	.	.
scaffold_385	489301	489400	chrUn_11	0.588472	1.6752	8	shore	-7550	GSONMT00061662001	FOXB2_XENLA	Forkhead box protein B2	5e-132	.
scaffold_385	497201	497300	chrUn_11	1.95612	1.78796	7	shore	0	GSONMT00061662001	FOXB2_XENLA	Forkhead box protein B2	5e-132	.
scaffold_385	497301	497400	chrUn_11	0.65795	1.77256	4	shore	0	GSONMT00061662001	FOXB2_XENLA	Forkhead box protein B2	5e-132	.
scaffold_3854	7901	8000	chrUn	0.596883	0.330351	9	island	0	GSONMT00013035001		.	.	.
scaffold_3854	8001	8100	chrUn	0.114307	0.839038	7	island	0	GSONMT00013035001		.	.	.
scaffold_3854	8101	8200	chrUn	0.911221	0.449714	7	island	0	GSONMT00013035001		.	.	.
scaffold_387	574701	574800	chrUn_27	1.45901	0.586801	6	shore	0	GSONMT00015638001	SEN34_HUMAN	tRNA-splicing endonuclease subunit Sen34	2e-48	.
scaffold_3870	27201	27300	chrUn_2	0.746527	0.781798	2	shore	0	GSONMT00004742001	VATC1_XENLA	V-type proton ATPase subunit C 1	0	.
scaffold_38712	2101	2200	chrUn	0.33804	1.29649	9	open sea	.	.		.	.	.
scaffold_38849	201	300	chrUn	0.156916	3.04732	6	open sea	0	GSONMT00059540001	HXC8A_TAKRU	Homeobox protein Hox-C8a	1e-95	.
scaffold_38849	301	400	chrUn	0.713146	0.773214	5	open sea	0	GSONMT00059540001	HXC8A_TAKRU	Homeobox protein Hox-C8a	1e-95	.
scaffold_39054	1901	2000	chrUn	0.239526	0.396005	8	island	.	.		.	.	.
scaffold_3912	45201	45300	chrUn	0.199603	1.39349	8	island	0	GSONMT00056878001	UNC80_HUMAN	Protein unc-80 homolog	0	.
scaffold_393	660301	660400	chrUn_28	0.933247	0.587469	7	island	0	GSONMT00023609001	JUN_SERCA	Transcription factor AP-1	6e-130	.
scaffold_394	233801	233900	chrUn	0.191865	0.848605	3	shore	0	GSONMT00058624001	FOXF1_DANRE	Forkhead box protein F1	0	.
scaffold_394	233901	234000	chrUn	0	0.763602	3	shore	0	GSONMT00058624001	FOXF1_DANRE	Forkhead box protein F1	0	.
scaffold_3969	55701	55800	chrUn_15	0.385006	0.286832	3	open sea	-1364	GSONMT00048485001	NETO1_HUMAN	Neuropilin and tolloid-like protein 1	2e-69	.
scaffold_397	252601	252700	chrUn_12	0.526384	1.12828	7	island	.	.		.	.	.
scaffold_4	1611801	1611900	chr_8	0.347222	0.993578	12	island	0	GSONMT00077820001	FGF12_RAT	Fibroblast growth factor 12	2e-149	.
scaffold_40	818601	818700	chrUn	0	0.446621	6	open sea	.	.		.	.	.
scaffold_4031	33201	33300	chrUn	0.0457875	0	3	shore	0	GSONMT00012684001	ARI1A_MOUSE	AT-rich interactive domain-containing protein 1A	0	.
scaffold_404	403001	403100	chr_16	1.01647	1.72194	5	shelf	.	.		.	.	.
scaffold_404	465001	465100	chr_16	0.860153	3.20195	6	open sea	0	GSONMT00002109001	DLX4B_DANRE	Homeobox protein Dlx4b	2e-132	.
scaffold_4044	1001	1100	chrUn	0.0128008	0.466586	5	shore	.	.		.	.	.
scaffold_4046	49001	49100	chrUn	0.725058	3.64908	4	island	.	.		.	.	.
scaffold_405	457101	457200	chrUn_12	0.858719	2.34565	6	island	0	GSONMT00003052001	CAN5_MOUSE	Calpain-5	0	.
scaffold_407	39501	39600	chrUn_2	0	4.73787	5	shore	.	.		.	.	.
scaffold_407	486001	486100	chrUn_2	0.786418	0.927555	7	island	0	GSONMT00052932001	NR2F5_DANRE	Nuclear receptor subfamily 2 group F member 5	0	.
scaffold_40855	2201	2300	chrUn	0.0548246	1.44895	5	shore	.	.		.	.	.
scaffold_40994	1701	1800	chrUn	0.514357	3.45702	6	island	0	GSONMT00000655001	GRM7_RAT	Metabotropic glutamate receptor 7	6e-63	.
scaffold_41029	801	900	chrUn	0.572234	0.819394	8	island	.	.		.	.	.
scaffold_41029	901	1000	chrUn	0.360383	0.851553	4	island	.	.		.	.	.
scaffold_41058	1301	1400	chrUn	0.782699	0.429842	10	island	.	.		.	.	.
scaffold_411	774201	774300	chrUn	0.665674	1.98645	6	shore	1485	GSONMT00000269001	CEL_BOVIN	Bile salt-activated lipase	0	.
scaffold_412	115301	115400	chrUn_9	5.24815	4.32319	7	open sea	-226	GSONMT00028352001	AAAS_HUMAN	Aladin	0	.
scaffold_41258	2201	2300	chrUn	0.22887	0.186619	3	open sea	.	.		.	.	.
scaffold_41258	2601	2700	chrUn	0.486581	0.467394	5	open sea	.	.		.	.	.
scaffold_414	271101	271200	chrUn_21	0.119669	0.58373	7	island	0	GSONMT00001539001	FAH2A_DANRE	Fatty-acid amide hydrolase 2-A	1e-22	.
scaffold_414	271201	271300	chrUn_21	0.94312	0.963235	9	island	0	GSONMT00001539001	FAH2A_DANRE	Fatty-acid amide hydrolase 2-A	1e-22	.
scaffold_41423	2901	3000	chrUn	0.310454	0.143472	6	island	.	.		.	.	.
scaffold_4156	8201	8300	chrUn	0.53346	2.47242	7	island	0	GSONMT00033547001	PDX1_MESAU	Pancreas/duodenum homeobox protein 1	3e-72	.
scaffold_4156	32501	32600	chrUn	0.0589971	0.208454	6	shore	0	GSONMT00033550001	PAN3_XENTR	PAB-dependent poly(A)-specific ribonuclease subunit PAN3	0	.
scaffold_4156	32801	32900	chrUn	0.189394	0.0396825	5	island	0	GSONMT00033550001	PAN3_XENTR	PAB-dependent poly(A)-specific ribonuclease subunit PAN3	0	.
scaffold_4162	1601	1700	chrUn	0.63675	0.726723	11	island	0	GSONMT00002728001	SOX9B_XENLA	Transcription factor Sox-9-B	0	.
scaffold_4162	1701	1800	chrUn	1.2599	0.814758	8	island	0	GSONMT00002728001	SOX9B_XENLA	Transcription factor Sox-9-B	0	.
scaffold_4190	36701	36800	chrUn_7	0.56494	3.84459	4	island	0	GSONMT00011299001	GATA2_XENLA	GATA-binding factor 2	0	.
scaffold_4211	7101	7200	chrUn	0.202242	0.105575	9	open sea	0	GSONMT00060129001	MOD5_HUMAN	tRNA dimethylallyltransferase, mitochondrial	2e-11	.
scaffold_422	470201	470300	chrUn_10	0.255102	0.577804	6	island	-14	GSONMT00004079001	PHLB2_MOUSE	Pleckstrin homology-like domain family B member 2	0	.
scaffold_422	716501	716600	chrUn_10	0.473654	1.04287	5	open sea	0	GSONMT00004097001	MA7D2_MOUSE	MAP7 domain-containing protein 2	5e-23	.
scaffold_4221	18901	19000	chrUn	0.647173	0.955355	6	island	0	GSONMT00029001001	BHE40_SHEEP	Class E basic helix-loop-helix protein 40	1e-105	.
scaffold_423	49301	49400	chrUn_5	0.555328	0.407452	8	island	0	GSONMT00021040001	EEPD1_DANRE	Endonuclease/exonuclease/phosphatase family domain-containing protein 1	0	.
scaffold_423	401301	401400	chrUn_5	0.0813008	0.405328	7	shore	1984	GSONMT00021069001	REEP5_PONAB	Receptor expression-enhancing protein 5	1e-79	.
scaffold_42435	401	500	chrUn	0.437411	0.677547	7	island	.	.		.	.	.
scaffold_42435	601	700	chrUn	0.831681	1.17705	13	island	.	.		.	.	.
scaffold_42583	801	900	chrUn_26	0.818194	4.4006	3	open sea	.	.		.	.	.
scaffold_428	68701	68800	chr_18	0.532884	0.420332	6	open sea	-19	GSONMT00001297001	TBB7_CHICK	Tubulin beta-7 chain	9e-138	.
scaffold_428	101701	101800	chr_18	0.722651	0.626781	5	shore	-1467	GSONMT00001299001	ZN384_HUMAN	Zinc finger protein 384	2e-115	.
scaffold_429	613401	613500	chrUn_2	0.680043	0.442498	8	open sea	0	GSONMT00054121001	RCCD1_HUMAN	RCC1 domain-containing protein 1	3e-84	.
scaffold_429	802301	802400	chrUn_2	0.605943	4.74479	4	shore	0	GSONMT00054124001	1A1L1_TAKRU	1-aminocyclopropane-1-carboxylate synthase-like protein 1	0	.
scaffold_430	681701	681800	chrUn_15	1.20011	0.334383	8	island	0	GSONMT00020646001	GFOD1_MOUSE	Glucose-fructose oxidoreductase domain-containing protein 1	1e-38	.
scaffold_430	681801	681900	chrUn_15	0.280112	0.282493	7	island	0	GSONMT00020646001	GFOD1_MOUSE	Glucose-fructose oxidoreductase domain-containing protein 1	1e-38	.
scaffold_43015	801	900	chrUn	0.631576	0.562959	3	shore	.	.		.	.	.
scaffold_431	154801	154900	chrUn_29	0.284802	0.236803	6	open sea	545	GSONMT00006064001	EVA1C_MOUSE	Protein eva-1 homolog C	4e-67	.
scaffold_431	649401	649500	chrUn_29	1.0447	5.1883	7	island	.	.		.	.	.
scaffold_433	771001	771100	chrUn_16	0.809344	0.441159	3	shore	0	GSONMT00029181001	DEAF1_DROME	Deformed epidermal autoregulatory factor 1	5e-11	.
scaffold_433	771101	771200	chrUn_16	0.822218	0.602274	10	island	0	GSONMT00029181001	DEAF1_DROME	Deformed epidermal autoregulatory factor 1	5e-11	.
scaffold_434	248401	248500	chrUn_12	1.13038	0.467417	10	island	0	GSONMT00021791001	TNKS1_HUMAN	Tankyrase-1	7e-70	.
scaffold_434	248701	248800	chrUn_12	0.29616	0.205148	7	island	0	GSONMT00021791001	TNKS1_HUMAN	Tankyrase-1	7e-70	.
scaffold_436	403801	403900	chrUn_1	0.264368	1.23913	8	island	0	GSONMT00022613001	SRF_XENLA	Serum response factor	3e-70	.
scaffold_436	404001	404100	chrUn_1	0.363267	0.133802	7	island	0	GSONMT00022613001	SRF_XENLA	Serum response factor	3e-70	.
scaffold_439	283801	283900	chrUn_14	2.47469	8.92004	6	island	0	GSONMT00032395001	NKX32_XENLA	Homeobox protein Nkx-3.2	1e-68	.
scaffold_44	1090101	1090200	chrUn_5	1.15106	2.71547	8	island	0	GSONMT00078276001	FOXQ1_RAT	Forkhead box protein Q1	5e-68	.
scaffold_44	1096701	1096800	chrUn_5	0.972665	2.73456	8	island	0	GSONMT00078277001	FOXF2_HUMAN	Forkhead box protein F2	3e-126	.
scaffold_44	1096801	1096900	chrUn_5	0.441031	1.99997	7	island	0	GSONMT00078277001	FOXF2_HUMAN	Forkhead box protein F2	3e-126	.
scaffold_4440	25201	25300	chrUn	1.00747	3.21047	3	open sea	-2779	GSONMT00024524001	TFB1M_XENLA	Dimethyladenosine transferase 1, mitochondrial	3e-110	.
scaffold_445	249701	249800	chrUn_8	0.98068	0.203268	10	island	0	GSONMT00008962001	JUN_SERCA	Transcription factor AP-1	2e-93	.
scaffold_445	710201	710300	chrUn_8	0.539849	4.91469	8	island	.	.		.	.	.
scaffold_4463	35301	35400	chrUn	1.16748	2.32831	9	shore	0	GSONMT00005564001	AVR2B_CHICK	Activin receptor type-2B	5e-71	.
scaffold_447	634801	634900	chrUn_24	1.93362	0.54855	11	island	0	GSONMT00041394001	STRN4_HUMAN	Striatin-4	0	.
scaffold_449	194001	194100	chrUn_10	0.233995	0.489623	11	island	0	GSONMT00049936001	UBP32_HUMAN	Ubiquitin carboxyl-terminal hydrolase 32	0	.
scaffold_449	421901	422000	chrUn_10	1.33825	1.7368	3	open sea	0	GSONMT00049943001	TBX2_DANRE	T-box transcription factor TBX2b	0	.
scaffold_449	422001	422100	chrUn_10	0.35233	2.89584	9	open sea	0	GSONMT00049943001	TBX2_DANRE	T-box transcription factor TBX2b	0	.
scaffold_45	1907901	1908000	chrUn_16	0.234689	0.543651	4	open sea	0	GSONMT00078430001	NOGG2_DANRE	Noggin-2	7e-101	.
scaffold_45182	1901	2000	chrUn	0.464429	2.71021	5	open sea	.	.		.	.	.
scaffold_45182	2001	2100	chrUn	0.111111	3.21918	3	open sea	.	.		.	.	.
scaffold_453	618601	618700	chrUn_9	0.5774	3.39337	11	island	0	GSONMT00059305001	KCNK9_XENLA	Potassium channel subfamily K member 9	2e-146	.
scaffold_45362	2201	2300	chrUn	0.477159	1.73389	12	island	0	GSONMT00023168001		.	.	.
scaffold_4544	13201	13300	chrUn	0.349773	0.419494	9	island	0	GSONMT00011917001	CY1_HUMAN	Cytochrome c1, heme protein, mitochondrial	1e-10	.
scaffold_45458	601	700	chrUn	0.483192	0.595231	7	island	.	.		.	.	.
scaffold_456	521001	521100	chrUn_21	0.51532	0.433238	13	island	0	GSONMT00062209001	SIK2_CHICK	Serine/threonine-protein kinase SIK2	5e-41	.
scaffold_457	785501	785600	chrUn_12	2.57931	5.63552	5	island	0	GSONMT00010706001	INSM2_MOUSE	Insulinoma-associated protein 2	9e-106	.
scaffold_457	786001	786100	chrUn_12	0.797777	0.947832	9	island	0	GSONMT00010706001	INSM2_MOUSE	Insulinoma-associated protein 2	9e-106	.
scaffold_458	202501	202600	chrUn_9	0.8383	0.178115	5	island	0	GSONMT00027279001	YBOX1_XENLA	Nuclease-sensitive element-binding protein 1	8e-57	.
scaffold_459	757501	757600	chrUn_1	0.33293	2.03401	4	shore	.	.		.	.	.
scaffold_459	757601	757700	chrUn_1	0.808558	2.15101	10	island	.	.		.	.	.
scaffold_4601	46401	46500	chrUn	1.32151	3.39698	1	shore	0	GSONMT00038169001		.	.	.
scaffold_46032	1901	2000	chrUn	0	1.08595	5	open sea	-13	GSONMT00018763001		.	.	.
scaffold_46032	2001	2100	chrUn	0.87116	0.590743	9	open sea	-113	GSONMT00018763001		.	.	.
scaffold_461	590801	590900	chrUn_13	0.116959	2.38196	5	shore	0	GSONMT00059089001	FOXD2_XENLA	Forkhead box protein D2	2e-57	.
scaffold_4627	47401	47500	chrUn	1.34672	12.0171	3	island	0	GSONMT00046474001	SX19A_DANRE	Transcription factor Sox-19a	2e-126	.
scaffold_466	566701	566800	chrUn_8	0.686831	0.397076	8	shore	.	.		.	.	.
scaffold_46649	801	900	chrUn	1.78634	4.36088	7	island	0	GSONMT00026746001	IRX4A_XENLA	Iroquois-class homeodomain protein irx-4-A	7e-56	.
scaffold_46649	901	1000	chrUn	0.390733	6.07566	4	island	0	GSONMT00026746001	IRX4A_XENLA	Iroquois-class homeodomain protein irx-4-A	7e-56	.
scaffold_4672	28101	28200	chrUn	0.241361	0.565682	6	shore	9355	GSONMT00015355001	CAHD1_HUMAN	VWFA and cache domain-containing protein 1	9e-90	.
scaffold_46895	1301	1400	chrUn	0.418222	0.613308	6	island	.	.		.	.	.
scaffold_46895	1401	1500	chrUn	0.556509	6.1737	10	island	.	.		.	.	.
scaffold_47	1473901	1474000	chrUn_3	1.63981	1.44721	8	shore	.	.		.	.	.
scaffold_47	1474001	1474100	chrUn_3	1.04956	1.78852	9	island	.	.		.	.	.
scaffold_4700	14101	14200	chrUn	0.988346	2.25157	6	island	0	GSONMT00012088001	DMRT3_TAKRU	Doublesex- and mab-3-related transcription factor 3	1e-67	.
scaffold_472	770901	771000	chrUn_6	0.95447	0.207545	4	shore	0	GSONMT00037657001	PTC1_MOUSE	Protein patched homolog 1	5e-48	.
scaffold_472	771001	771100	chrUn_6	0.519704	0.444713	11	island	0	GSONMT00037657001	PTC1_MOUSE	Protein patched homolog 1	5e-48	.
scaffold_4720	1301	1400	chrUn	0.119585	0.320335	9	island	-731	GSONMT00020017001	KPCE_RABIT	Protein kinase C epsilon type	3e-49	.
scaffold_4720	1401	1500	chrUn	0.633433	0.29772	5	island	-831	GSONMT00020017001	KPCE_RABIT	Protein kinase C epsilon type	3e-49	.
scaffold_47507	1101	1200	chrUn	0.118905	4.40243	5	island	0	GSONMT00063459001	LAML3_XENLA	Lamin-L(III)	3e-24	.
scaffold_4752	40101	40200	chrUn	0.645467	0.42439	6	island	0	GSONMT00054602001	TLE1_HUMAN	Transducin-like enhancer protein 1	2e-77	.
scaffold_4767	18201	18300	chrUn	0.206954	0.0275558	11	island	0	GSONMT00039628001	RN19A_PIG	E3 ubiquitin-protein ligase RNF19A	1e-69	.
scaffold_477	85401	85500	chrUn_20	0.484165	0.30525	5	shore	0	GSONMT00023217001	KCTD5_RAT	BTB/POZ domain-containing protein KCTD5	7e-126	.
scaffold_477	85501	85600	chrUn_20	1.09553	0.10132	8	island	0	GSONMT00023217001	KCTD5_RAT	BTB/POZ domain-containing protein KCTD5	7e-126	.
scaffold_48	1904001	1904100	chrUn_24	0.197965	0.202979	6	shelf	0	GSONMT00078668001	CRK_XENLA	Adapter molecule crk	9e-145	.
scaffold_48108	1401	1500	chrUn	0.362976	0.630388	4	open sea	.	.		.	.	.
scaffold_4815	6201	6300	chrUn	3.40865	1.85559	5	shore	0	GSONMT00063419001	GID4_MOUSE	Glucose-induced degradation protein 4 homolog	2e-133	.
scaffold_4815	6301	6400	chrUn	0.553552	0.881122	9	island	0	GSONMT00063419001	GID4_MOUSE	Glucose-induced degradation protein 4 homolog	2e-133	.
scaffold_482	528401	528500	chrUn_11	0.330576	4.34836	6	island	0	GSONMT00014562001	PDE4D_HUMAN	cAMP-specific 3',5'-cyclic phosphodiesterase 4D	2e-18	.
scaffold_483	73201	73300	chrUn_11	0.0520833	0.292138	7	island	0	GSONMT00045118001	RNF10_MOUSE	RING finger protein 10	0	.
scaffold_483	326101	326200	chrUn_11	0.900621	12.4666	5	island	0	GSONMT00045130001	BICR1_DANRE	Bicaudal D-related protein 1	2e-17	.
scaffold_48521	1101	1200	chrUn	0.256923	0.403743	6	open sea	.	.		.	.	.
scaffold_4871	6501	6600	chrUn	0.620321	0.229006	10	open sea	.	.		.	.	.
scaffold_488	501201	501300	chrUn_23	0.393745	1.09867	9	shelf	-83	GSONMT00059902001	PHIPL_DANRE	Phytanoyl-CoA hydroxylase-interacting protein-like	0	.
scaffold_49	1245001	1245100	chrUn_10	7.84159	8.07033	8	shelf	3844	GSONMT00078768001	ZO20_XENLA	Oocyte zinc finger protein XlCOF20, partial	8e-33	.
scaffold_490	31401	31500	chrUn	0.490624	1.89042	11	island	0	GSONMT00025332001	CPNE5_HUMAN	Copine-5	3e-62	.
scaffold_490	31501	31600	chrUn	0.600435	1.97743	11	island	0	GSONMT00025332001	CPNE5_HUMAN	Copine-5	3e-62	.
scaffold_49135	2401	2500	chrUn	0	1.05389	3	open sea	.	.		.	.	.
scaffold_4948	32401	32500	chrUn	1.29436	13.0605	5	shore	.	.		.	.	.
scaffold_495	67001	67100	chrUn_7	1.35645	2.86846	9	shore	0	GSONMT00044809001	C1QL2_HUMAN	Complement C1q-like protein 2	8e-105	.
scaffold_498	677801	677900	chrUn_14	0.661913	5.09431	7	island	0	GSONMT00016963001	TLX3_CHICK	T-cell leukemia homeobox protein 3	6e-102	.
scaffold_49866	401	500	chrUn	0.141169	0.592796	7	open sea	.	.		.	.	.
scaffold_49909	2101	2200	chrUn	1.8774	2.62275	6	shore	0	GSONMT00044784001		.	.	.
scaffold_49909	2401	2500	chrUn	0.707607	4.37319	9	island	0	GSONMT00044784001		.	.	.
scaffold_49909	2501	2600	chrUn	1.55407	4.34782	4	shore	0	GSONMT00044784001		.	.	.
scaffold_50018	2101	2200	chrUn	0.10752	1.34043	5	shore	.	.		.	.	.
scaffold_5013	10601	10700	chrUn	0.675135	7.81361	6	island	.	.		.	.	.
scaffold_50168	601	700	chrUn	3.81062	2.58828	4	open sea	.	.		.	.	.
scaffold_50724	1001	1100	chrUn	0.567631	3.13332	8	shore	.	.		.	.	.
scaffold_50901	401	500	chrUn	0.928109	3.03731	10	island	.	.		.	.	.
scaffold_5093	23501	23600	chrUn	0.754275	1.13089	9	island	.	.		.	.	.
scaffold_511	482001	482100	chrUn_15	1.17783	4.89645	8	island	-4390	GSONMT00031307001	NRP1A_DANRE	Neuropilin-1a	1e-10	.
scaffold_516	600201	600300	chrUn	0.694074	0.646855	8	island	0	GSONMT00001793001	NDUBB_CRIGR	NADH dehydrogenase	2e-36	.
scaffold_5164	21501	21600	chrUn	0.474267	0.328955	9	island	0	GSONMT00013131001	DPS1_HUMAN	Decaprenyl-diphosphate synthase subunit 1	3e-176	.
scaffold_51819	901	1000	chrUn_6	0.420603	2.03624	9	island	.	.		.	.	.
scaffold_519	716101	716200	chrUn_12	0.199542	0.524727	10	open sea	-3239	GSONMT00031731001	TBX2_DANRE	T-box transcription factor TBX2b	4e-96	.
scaffold_520	657001	657100	chrUn_4	1.06038	3.38681	7	island	3337	GSONMT00034528001	LADD_ONCMY	Ladderlectin	2e-42	.
scaffold_52136	2501	2600	chrUn	0.385994	6.51618	4	open sea	.	.		.	.	.
scaffold_523	23901	24000	chrUn_2	0.189255	5.59375	7	shore	0	GSONMT00000160001	TMM74_MOUSE	Transmembrane protein 74	2e-54	.
scaffold_5231	29201	29300	chrUn_14	0.32284	0.496537	5	island	0	GSONMT00028987001	ROA0_MOUSE	Heterogeneous nuclear ribonucleoprotein A0	3e-85	.
scaffold_5231	29301	29400	chrUn_14	0.840032	0	9	island	0	GSONMT00028987001	ROA0_MOUSE	Heterogeneous nuclear ribonucleoprotein A0	3e-85	.
scaffold_52474	1501	1600	chrUn	0.509765	0.40723	5	open sea	-164	GSONMT00019919001	SAAL1_DANRE	Protein saal1	6e-24	.
scaffold_52474	1601	1700	chrUn	0.625072	0.328664	4	open sea	-64	GSONMT00019919001	SAAL1_DANRE	Protein saal1	6e-24	.
scaffold_529	479801	479900	chrUn	0.680312	3.19951	8	island	0	GSONMT00050793001	XKR4_TETNG	XK-related protein 4	8e-93	.
scaffold_529	685801	685900	chrUn	0.620084	0.832491	13	island	0	GSONMT00050808001	ZSWM5_MOUSE	Zinc finger SWIM domain-containing protein 5	0	.
scaffold_529	685901	686000	chrUn	0.245399	0.310034	7	island	0	GSONMT00050808001	ZSWM5_MOUSE	Zinc finger SWIM domain-containing protein 5	0	.
scaffold_53	1619201	1619300	chrUn_Sex	0.645822	1.01594	8	island	.	.		.	.	.
scaffold_53	2116801	2116900	chrUn_Sex	0.297619	2.49467	5	shore	.	.		.	.	.
scaffold_53116	1101	1200	chrUn	1.02577	2.14315	16	open sea	-509	GSONMT00006572001	NMD3B_HUMAN	Glutamate receptor ionotropic, NMDA 3B	4e-13	.
scaffold_5313	15001	15100	chrUn	1.85942	1.26992	7	island	.	.		.	.	.
scaffold_53280	1501	1600	chrUn	1.18027	1.0556	9	shore	.	.		.	.	.
scaffold_53309	2201	2300	chrUn	2.41827	3.06938	9	open sea	.	.		.	.	.
scaffold_535	476801	476900	chrUn_28	0.052521	2.28426	10	island	0	GSONMT00014491001	LYOX_RAT	Protein-lysine 6-oxidase	3e-131	.
scaffold_53887	1501	1600	chrUn	0.756877	1.87645	13	island	.	.		.	.	.
scaffold_539	106501	106600	chrUn_3	0.47098	2.13387	6	island	.	.		.	.	.
scaffold_543	378601	378700	chrUn_15	0.660065	0.152439	7	island	0	GSONMT00053513001	ABCF3_RAT	ATP-binding cassette sub-family F member 3	1e-48	.
scaffold_54727	1901	2000	chrUn	0.327978	0.492721	6	shore	.	.		.	.	.
scaffold_54727	2001	2100	chrUn	0.896618	1.54308	5	shore	.	.		.	.	.
scaffold_54727	2201	2300	chrUn	0.528947	0.716484	4	shore	.	.		.	.	.
scaffold_54767	501	600	chrUn	0	3.3048	3	island	.	.		.	.	.
scaffold_54767	601	700	chrUn	1.43236	1.34185	7	island	.	.		.	.	.
scaffold_5487	2401	2500	chrUn	0.869789	2.7447	10	island	-308	GSONMT00011376001	PP14A_MOUSE	Protein phosphatase 1 regulatory subunit 14A	5e-37	.
scaffold_5487	2501	2600	chrUn	0.308737	0.497955	4	island	-208	GSONMT00011376001	PP14A_MOUSE	Protein phosphatase 1 regulatory subunit 14A	5e-37	.
scaffold_55	1872401	1872500	chr_24	0.603892	0.167401	8	island	0	GSONMT00079508001	IP3KC_MOUSE	Inositol-trisphosphate 3-kinase C	2e-132	.
scaffold_55	1909601	1909700	chr_24	0.972533	2.51638	8	island	.	.		.	.	.
scaffold_550	99101	99200	chr_4	0.652899	4.96659	4	open sea	-93	GSONMT00046039001	QSER1_XENLA	Glutamine and serine-rich protein 1	2e-19	.
scaffold_5501	36901	37000	chrUn	0.520515	1.40682	8	island	9390	GSONMT00022370001	YTHD1_MOUSE	YTH domain-containing family protein 1	0	.
scaffold_5501	37001	37100	chrUn	0.602284	0.293776	8	island	9490	GSONMT00022370001	YTHD1_MOUSE	YTH domain-containing family protein 1	0	.
scaffold_552	239801	239900	chrUn_5	0.610463	0.480704	6	shore	0	GSONMT00053688001	BTBD2_HUMAN	BTB/POZ domain-containing protein 2	0	.
scaffold_55385	2501	2600	chrUn	1.2389	1.30507	5	open sea	-629	GSONMT00048118001	RTJK_DROME	RNA-directed DNA polymerase from mobile element jockey	5e-21	.
scaffold_554	384501	384600	chr_1	0.206787	0.446858	5	open sea	0	GSONMT00023921001	FKBP8_HUMAN	Peptidyl-prolyl cis-trans isomerase FKBP8	4e-68	.
scaffold_554	384601	384700	chr_1	0	0.0389864	2	open sea	0	GSONMT00023921001	FKBP8_HUMAN	Peptidyl-prolyl cis-trans isomerase FKBP8	4e-68	.
scaffold_55558	1201	1300	chrUn	0.392405	0.448436	4	open sea	.	.		.	.	.
scaffold_55558	1301	1400	chrUn	0.0531632	1.24573	5	open sea	.	.		.	.	.
scaffold_55578	1201	1300	chrUn	0.164501	1.18134	10	island	.	.		.	.	.
scaffold_55578	1301	1400	chrUn	0.323633	1.23778	10	island	.	.		.	.	.
scaffold_556	434801	434900	chrUn_14	0.880003	2.1932	7	shore	0	GSONMT00041061001	FOXN3_XENTR	Forkhead box protein N3	3e-32	.
scaffold_5578	27301	27400	chrUn	0.0694444	6.3769	11	island	.	.		.	.	.
scaffold_5578	27401	27500	chrUn	0.330887	3.48966	12	island	.	.		.	.	.
scaffold_560	349901	350000	chrUn_6	0.777874	0.817587	6	open sea	-9855	GSONMT00014039001	ZNF83_HUMAN	Zinc finger protein 83	4e-77	.
scaffold_561	508201	508300	chrUn_7	0.453984	0.466809	9	island	0	GSONMT00048103001	TCF15_CHICK	Transcription factor 15	1e-77	.
scaffold_5645	5201	5300	chrUn	0.125858	1.71275	8	island	.	.		.	.	.
scaffold_569	505201	505300	chrUn_20	0.477955	0.881906	7	shelf	0	GSONMT00063585001	BI2L1_MOUSE	Brain-specific angiogenesis inhibitor 1-associated protein 2-like protein 1	0	.
scaffold_57179	501	600	chrUn	1.37452	1.40013	5	island	0	GSONMT00039950001	HXA9B_TAKRU	Homeobox protein Hox-A9b	2e-96	.
scaffold_57179	601	700	chrUn	0.26738	0.473966	5	island	0	GSONMT00039950001	HXA9B_TAKRU	Homeobox protein Hox-A9b	2e-96	.
scaffold_57179	701	800	chrUn	0.129199	2.92705	6	island	0	GSONMT00039950001	HXA9B_TAKRU	Homeobox protein Hox-A9b	2e-96	.
scaffold_57272	2101	2200	chrUn	1.16327	0.480303	6	shore	0	GSONMT00036628001	CEBPA_HUMAN	CCAAT/enhancer-binding protein alpha	7e-31	.
scaffold_57272	2301	2400	chrUn	0.633904	0.582841	4	shore	0	GSONMT00036628001	CEBPA_HUMAN	CCAAT/enhancer-binding protein alpha	7e-31	.
scaffold_5728	16301	16400	chrUn	0.136092	1.15384	6	open sea	-40	GSONMT00005933001	PURG_HUMAN	Purine-rich element-binding protein gamma	2e-129	.
scaffold_573	573501	573600	chrUn	0.629691	0.0643971	8	open sea	0	GSONMT00024596001	BCORL_MOUSE	BCL-6 corepressor-like protein 1	4e-98	.
scaffold_5782	33601	33700	chrUn	0.932699	1.22717	3	shore	0	GSONMT00060560001	ZBT10_HUMAN	Zinc finger and BTB domain-containing protein 10	5e-118	.
scaffold_57896	1101	1200	chrUn	0.0854701	0.603788	7	open sea	.	.		.	.	.
scaffold_5794	15701	15800	chrUn	0.696389	5.38214	6	island	0	GSONMT00042771001	GDF5_MOUSE	Growth/differentiation factor 5	1e-168	.
scaffold_5794	15801	15900	chrUn	0.293604	2.57641	6	island	0	GSONMT00042771001	GDF5_MOUSE	Growth/differentiation factor 5	1e-168	.
scaffold_58107	1201	1300	chrUn	0.420168	0.744096	7	island	-283	GSONMT00056224001	NOX4_PONAB	NADPH oxidase 4	1e-15	.
scaffold_582	625501	625600	chrUn	0.174849	0.227578	5	island	0	GSONMT00008621001	SFPQ_MOUSE	Splicing factor, proline- and glutamine-rich	1e-147	.
scaffold_58252	1201	1300	chrUn	0.383057	1.24783	8	island	0	GSONMT00013021001	RD10A_DANRE	Retinol dehydrogenase 10-A	5e-74	.
scaffold_583	39001	39100	chrUn_2	12.5144	11.1669	3	open sea	0	GSONMT00053723001	BID_PIG	BH3-interacting domain death agonist	1e-15	.
scaffold_58302	1601	1700	chrUn	0.254666	2.46938	10	shore	0	GSONMT00054746001	P3F3B_DANRE	POU domain, class 3, transcription factor 3-B	1e-73	.
scaffold_58302	1901	2000	chrUn	0.640629	6.40016	3	shore	0	GSONMT00054746001	P3F3B_DANRE	POU domain, class 3, transcription factor 3-B	1e-73	.
scaffold_58302	2001	2100	chrUn	0.478638	2.28985	11	island	0	GSONMT00054746001	P3F3B_DANRE	POU domain, class 3, transcription factor 3-B	1e-73	.
scaffold_58302	2101	2200	chrUn	1.96874	8.19161	8	island	0	GSONMT00054746001	P3F3B_DANRE	POU domain, class 3, transcription factor 3-B	1e-73	.
scaffold_58302	2201	2300	chrUn	0.263014	2.61245	3	shore	0	GSONMT00054746001	P3F3B_DANRE	POU domain, class 3, transcription factor 3-B	1e-73	.
scaffold_58373	1501	1600	chrUn	0.54027	2.80428	9	island	.	.		.	.	.
scaffold_58400	1801	1900	chrUn	0.412077	0.633371	10	island	.	.		.	.	.
scaffold_5883	9701	9800	chrUn	0.184385	2.84922	9	island	1888	GSONMT00005272001	PRDX1_MYOLU	Peroxiredoxin-1	3e-123	.
scaffold_59	113701	113800	chrUn_14	0.68004	0.962282	5	island	0	GSONMT00079665001	BCL2_CRIGR	Apoptosis regulator Bcl-2	6e-55	.
scaffold_59	1492801	1492900	chrUn_14	0.613801	0.147732	5	open sea	-54	GSONMT00079717001	RRAGC_MOUSE	Ras-related GTP-binding protein C	0	.
scaffold_592	377701	377800	chrUn	1.56337	0.212191	7	open sea	0	GSONMT00052009001	JARD2_DANRE	Protein Jumonji	0	.
scaffold_592	377801	377900	chrUn	0.488133	0	5	open sea	0	GSONMT00052009001	JARD2_DANRE	Protein Jumonji	0	.
scaffold_593	219301	219400	chrUn_23	0.311804	0.575442	6	open sea	2354	GSONMT00018057001	IPYR_BOVIN	Inorganic pyrophosphatase	9e-154	.
scaffold_596	72901	73000	chrUn_22	0.343717	0.406863	6	island	-105	GSONMT00042786001	DCNL2_HUMAN	DCN1-like protein 2	1e-149	.
scaffold_596	578901	579000	chrUn_22	0.524102	1.36838	4	shore	0	GSONMT00042802001	P3F3A_DANRE	POU domain, class 3, transcription factor 3-A	7e-123	.
scaffold_5967	24401	24500	chrUn	0.74497	1.0704	8	island	.	.		.	.	.
scaffold_60	1956801	1956900	chrUn_6	1.02519	3.03169	6	shore	-958	GSONMT00079898001	SIX2_MOUSE	Homeobox protein SIX2	4e-152	.
scaffold_60	2003601	2003700	chrUn_6	0.261123	2.80339	8	island	-8371	GSONMT00079899001	SIX3_CHICK	Homeobox protein SIX3	5e-169	.
scaffold_6015	36201	36300	chrUn	0.0862787	0.0598374	5	open sea	.	.		.	.	.
scaffold_6015	36301	36400	chrUn	0.367788	2.53068	6	open sea	.	.		.	.	.
scaffold_602	93101	93200	chrUn_14	0.518734	2.45842	9	open sea	0	GSONMT00037890001	ADA1B_MESAU	Alpha-1B adrenergic receptor	1e-144	.
scaffold_60267	1001	1100	chrUn	0.153	0.168073	7	open sea	.	.		.	.	.
scaffold_60267	1101	1200	chrUn	0.12963	0.357857	6	open sea	.	.		.	.	.
scaffold_606	349801	349900	chrUn	0.183194	2.15541	6	island	0	GSONMT00050546001	HELT_DANRE	Hairy and enhancer of split-related protein helt	2e-121	.
scaffold_606	349901	350000	chrUn	3.49207	7.86738	7	island	0	GSONMT00050546001	HELT_DANRE	Hairy and enhancer of split-related protein helt	2e-121	.
scaffold_6081	36501	36600	chrUn	0.242235	4.61532	6	island	0	GSONMT00004448001	MB211_DANRE	Protein mab-21-like 1	0	.
scaffold_609	415101	415200	chrUn_22	0.357143	1.87755	4	shelf	.	.		.	.	.
scaffold_61	1617901	1618000	chrUn_16	0.227029	0.76365	6	open sea	0	GSONMT00079992001	HXC8A_DANRE	Homeobox protein Hox-C8a	2e-150	.
scaffold_61	1636501	1636600	chrUn_16	0.378479	7.25483	4	island	0	GSONMT00079995001	HXCAA_TAKRU	Homeobox protein Hox-C10a	9e-80	.
scaffold_61	1650101	1650200	chrUn_16	0.419541	2.95497	5	shore	0	GSONMT00079996001	HXCBA_DANRE	Homeobox protein Hox-C11a	0	.
scaffold_61	1683801	1683900	chrUn_16	0.466341	1.45862	8	island	0	GSONMT00079998001	HXCDA_DANRE	Homeobox protein Hox-C13a	0	.
scaffold_612	472101	472200	chrUn	0.422932	4.49629	5	shelf	-2161	GSONMT00051313001	FEZF2_DANRE	Fez family zinc finger protein 2	0	.
scaffold_6135	25301	25400	chrUn	1.18269	7.77049	7	island	0	GSONMT00025436001	PCD10_HUMAN	Protocadherin-10	0	.
scaffold_614	418201	418300	chrUn_10	1.52537	5.9477	5	open sea	.	.		.	.	.
scaffold_61607	801	900	chrUn	0.524096	0.988143	5	open sea	.	.		.	.	.
scaffold_61667	801	900	chrUn	0	5.65594	4	open sea	0	GSONMT00041449001	SMC2_HUMAN	Structural maintenance of chromosomes protein 2	9e-62	.
scaffold_61802	1401	1500	chrUn	0.633375	0.447375	9	open sea	0	GSONMT00024979001	EIF3B_HUMAN	Eukaryotic translation initiation factor 3 subunit B	1e-19	.
scaffold_62065	1801	1900	chrUn	0.683184	0.411123	7	island	.	.		.	.	.
scaffold_625	484001	484100	chrUn	0.164609	2.67927	5	shore	0	GSONMT00023475001	ZN503_DANRE	Zinc finger protein 503	0	.
scaffold_625	484101	484200	chrUn	0.692866	5.27237	8	shore	0	GSONMT00023475001	ZN503_DANRE	Zinc finger protein 503	0	.
scaffold_625	484201	484300	chrUn	0.409269	6.00111	7	island	0	GSONMT00023475001	ZN503_DANRE	Zinc finger protein 503	0	.
scaffold_625	484301	484400	chrUn	1.0956	6.21463	6	island	0	GSONMT00023475001	ZN503_DANRE	Zinc finger protein 503	0	.
scaffold_625	484401	484500	chrUn	0.368698	3.39531	7	island	0	GSONMT00023475001	ZN503_DANRE	Zinc finger protein 503	0	.
scaffold_626	62001	62100	chrUn_7	0.679556	1.11899	12	island	0	GSONMT00050391001	ATS5_HUMAN	A disintegrin and metalloproteinase with thrombospondin motifs 5	0	.
scaffold_626	88801	88900	chrUn_7	1.20526	1.18644	7	shore	0	GSONMT00050393001	ATS1_RAT	A disintegrin and metalloproteinase with thrombospondin motifs 1	0	.
scaffold_62657	901	1000	chrUn	3.6346	1.40273	4	open sea	.	.		.	.	.
scaffold_62657	1001	1100	chrUn	1.45029	1.00192	5	open sea	.	.		.	.	.
scaffold_627	86901	87000	chrUn_7	0.317425	0.435841	4	open sea	0	GSONMT00055306001	GBB1_DANRE	Guanine nucleotide-binding protein G(I)/G(S)/G(T) subunit beta-1	0	.
scaffold_63016	1	100	chrUn	0	0.0435068	1	open sea	.	.		.	.	.
scaffold_6318	34301	34400	chrUn	1.095	2.70856	6	island	.	.		.	.	.
scaffold_6325	22601	22700	chrUn_5	0.0485084	0.0322113	7	island	0	GSONMT00024774001	UBP24_HUMAN	Ubiquitin carboxyl-terminal hydrolase 24	2e-147	.
scaffold_633	468401	468500	chrUn	1.01118	4.03808	8	island	0	GSONMT00033539001	ASL1B_DANRE	Achaete-scute homolog 1b	2e-86	.
scaffold_6347	34101	34200	chrUn	0.0584795	0.149949	10	island	0	GSONMT00054847001	TAL1_DANRE	T-cell acute lymphocytic leukemia protein 1 homolog	6e-108	.
scaffold_6347	34201	34300	chrUn	0.445221	0.757199	6	island	0	GSONMT00054847001	TAL1_DANRE	T-cell acute lymphocytic leukemia protein 1 homolog	6e-108	.
scaffold_635	209001	209100	chrUn	0.0740741	1.10145	4	shore	0	GSONMT00040245001	PRD13_HUMAN	PR domain zinc finger protein 13	0	.
scaffold_635	213901	214000	chrUn	8.29301	10.4801	6	shelf	-76	GSONMT00040245001	PRD13_HUMAN	PR domain zinc finger protein 13	0	.
scaffold_63692	1101	1200	chrUn	1.08782	9.29113	3	open sea	.	.		.	.	.
scaffold_639	273301	273400	chrUn_2	0.299992	0.30955	5	open sea	0	GSONMT00026938001	SYAC_MOUSE	Alanine--tRNA ligase, cytoplasmic	0	.
scaffold_639	462801	462900	chrUn_2	0.562446	0.163121	2	shelf	0	GSONMT00026944001	SIAH1_DANRE	E3 ubiquitin-protein ligase Siah1	0	.
scaffold_64	61801	61900	chrUn_19	3.09367	7.35776	10	island	0	GSONMT00080178001	NKX21_HUMAN	Homeobox protein Nkx-2.1	3e-138	.
scaffold_64	61901	62000	chrUn_19	1.28545	0.481674	5	island	0	GSONMT00080178001	NKX21_HUMAN	Homeobox protein Nkx-2.1	3e-138	.
scaffold_64	357901	358000	chrUn_19	0.131736	1.62906	6	shelf	0	GSONMT00080193001	DPYL5_HUMAN	Dihydropyrimidinase-related protein 5	0	.
scaffold_64	358001	358100	chrUn_19	0.907306	2.36184	3	shelf	0	GSONMT00080193001	DPYL5_HUMAN	Dihydropyrimidinase-related protein 5	0	.
scaffold_64	1493101	1493200	chrUn_19	1.17532	1.62918	8	shore	0	GSONMT00080263001		.	.	.
scaffold_6400	17401	17500	chrUn	0	6.16719	4	open sea	.	.		.	.	.
scaffold_641	114001	114100	chrUn_2	0.50917	1.73053	10	island	0	GSONMT00063981001	ZNRF1_DANRE	E3 ubiquitin-protein ligase znrf1	2e-105	.
scaffold_6423	4401	4500	chrUn	0.276013	0.089545	9	shore	3976	GSONMT00028952001		.	.	.
scaffold_643	564701	564800	chrUn	0.27852	0.145162	6	island	0	GSONMT00052868001	BPTF_HUMAN	Nucleosome-remodeling factor subunit BPTF	1e-161	.
scaffold_64917	1801	1900	chrUn	0.306944	0.660376	5	island	.	.		.	.	.
scaffold_6505	28001	28100	chrUn	1.10977	2.36477	9	island	.	.		.	.	.
scaffold_651	55601	55700	chrUn_10	0.276879	0.512788	7	open sea	0	GSONMT00027820001	ZIC3_XENLA	Zinc finger protein ZIC 3	2e-137	.
scaffold_6525	29601	29700	chrUn	0.890893	0.498197	5	open sea	0	GSONMT00020414001	Z703B_XENLA	Zinc finger protein 703-B	2e-122	.
scaffold_6525	29701	29800	chrUn	3.03445	2.32355	5	open sea	0	GSONMT00020414001	Z703B_XENLA	Zinc finger protein 703-B	2e-122	.
scaffold_6572	34701	34800	chrUn	0.324352	2.47215	9	island	0	GSONMT00031235001	LHX2_MOUSE	LIM/homeobox protein Lhx2	2e-146	.
scaffold_65870	1501	1600	chrUn	0.541468	12.2409	9	island	.	.		.	.	.
scaffold_65874	901	1000	chrUn	0.372271	0.176903	8	island	.	.		.	.	.
scaffold_659	282001	282100	chrUn_13	0.80232	3.19656	10	island	0	GSONMT00029792001		.	.	.
scaffold_659	282101	282200	chrUn_13	0.42112	2.87803	8	island	0	GSONMT00029792001		.	.	.
scaffold_659	352301	352400	chrUn_13	0.518526	0.220426	7	shore	0	GSONMT00029794001	UBE2O_MOUSE	E2/E3 hybrid ubiquitin-protein ligase UBE2O	0	.
scaffold_66	788801	788900	chrUn_18	1.06461	0.550208	12	island	0	GSONMT00080352001	NRM_DANRE	Nurim	1e-109	.
scaffold_66	865601	865700	chrUn_18	0	0.615949	9	shore	0	GSONMT00080357001		.	.	.
scaffold_66	1758401	1758500	chrUn_18	0.633637	3.7851	7	island	0	GSONMT00080369001	EOMES_XENLA	Eomesodermin	0	.
scaffold_66	1758501	1758600	chrUn_18	0.591628	1.98847	5	island	0	GSONMT00080369001	EOMES_XENLA	Eomesodermin	0	.
scaffold_66	1758601	1758700	chrUn_18	0.116209	1.73	8	island	0	GSONMT00080369001	EOMES_XENLA	Eomesodermin	0	.
scaffold_664	451401	451500	chrUn	0.172222	1.45746	5	island	0	GSONMT00030824001	LRC52_HUMAN	Leucine-rich repeat-containing protein 52	6e-41	.
scaffold_66444	301	400	chrUn	0.722042	3.93653	9	island	.	.		.	.	.
scaffold_6651	2901	3000	chrUn	0.307077	0.396006	3	shelf	.	.		.	.	.
scaffold_6671	22501	22600	chr_5	0.464558	4.04951	7	island	0	GSONMT00057453001	ONEC2_HUMAN	One cut domain family member 2	1e-135	.
scaffold_669	532601	532700	chrUn_4	0.158822	2.1303	4	shore	0	GSONMT00023329001	GSX2_HUMAN	GS homeobox 2	3e-87	.
scaffold_67	70301	70400	chrUn_8	0.325944	0.579606	11	island	.	.		.	.	.
scaffold_67	70401	70500	chrUn_8	0.358879	0.302489	8	island	.	.		.	.	.
scaffold_67	241501	241600	chrUn_8	0.327478	0.37308	7	open sea	0	GSONMT00080391001	JAG2_HUMAN	Protein jagged-2	0	.
scaffold_67	775801	775900	chrUn_8	0.844282	5.73242	7	open sea	752	GSONMT00080423001	HAOX1_HUMAN	Hydroxyacid oxidase 1	2e-170	.
scaffold_67	1536001	1536100	chrUn_8	0.133333	0.703	8	shore	0	GSONMT00080459001	DCOR1_XENLA	Ornithine decarboxylase 1	0	.
scaffold_6701	24801	24900	chrUn	0.530116	6.55492	5	shelf	-3714	GSONMT00041251001	GRCR1_MOUSE	Glutaredoxin domain-containing cysteine-rich protein 1	1e-73	.
scaffold_6701	24901	25000	chrUn	0.168067	2.42465	9	shelf	-3614	GSONMT00041251001	GRCR1_MOUSE	Glutaredoxin domain-containing cysteine-rich protein 1	1e-73	.
scaffold_6705	26301	26400	chrUn	0.599129	0.0219298	6	open sea	0	GSONMT00055727001	PIM1_FELCA	Serine/threonine-protein kinase pim-1	2e-169	.
scaffold_6705	27301	27400	chrUn	2.02682	2.6794	8	open sea	0	GSONMT00055727001	PIM1_FELCA	Serine/threonine-protein kinase pim-1	2e-169	.
scaffold_673	160401	160500	chrUn	0.912175	0.627368	8	island	.	.		.	.	.
scaffold_673	160501	160600	chrUn	0.232191	0.411474	6	island	.	.		.	.	.
scaffold_673	406601	406700	chrUn	0.40305	1.447	6	shore	0	GSONMT00052566001	HXBDA_DANRE	Homeobox protein Hox-B13a	0	.
scaffold_673	438201	438300	chrUn	1.07788	0.941632	3	shore	0	GSONMT00052570001	HXB9A_DANRE	Homeobox protein Hox-B9a	1e-144	.
scaffold_673	438301	438400	chrUn	0.74628	1.02431	11	island	0	GSONMT00052570001	HXB9A_DANRE	Homeobox protein Hox-B9a	1e-144	.
scaffold_673	451601	451700	chrUn	0.44126	2.47579	6	shore	0	GSONMT00052572001	HXB8A_DANRE	Homeobox protein Hox-B8a	8e-164	.
scaffold_673	472701	472800	chrUn	1.09912	1.0212	7	island	0	GSONMT00052575001	HXB5A_DANRE	Homeobox protein Hox-B5a	7e-138	.
scaffold_673	472801	472900	chrUn	0.231025	0.456727	10	island	0	GSONMT00052575001	HXB5A_DANRE	Homeobox protein Hox-B5a	7e-138	.
scaffold_673	488001	488100	chrUn	0.910546	0.770759	11	island	0	GSONMT00052577001	HXB4A_DANRE	Homeobox protein Hox-B4a	2e-145	.
scaffold_67342	1501	1600	chrUn	0.662098	0.167527	12	island	.	.		.	.	.
scaffold_6751	11201	11300	chrUn	0.582437	2.41416	4	shore	-342	GSONMT00024432001	PCD10_HUMAN	Protocadherin-10	5e-143	.
scaffold_6751	11301	11400	chrUn	0.255659	1.64353	6	island	-242	GSONMT00024432001	PCD10_HUMAN	Protocadherin-10	5e-143	.
scaffold_67642	1601	1700	chrUn	0.666989	0.537441	9	island	.	.		.	.	.
scaffold_682	16001	16100	chrUn	0.576007	16.9367	10	island	.	.		.	.	.
scaffold_682	501701	501800	chrUn	0.484595	1.70227	7	shore	0	GSONMT00063637001	B3GA2_CANFA	Galactosylgalactosylxylosylprotein 3-beta-glucuronosyltransferase 2	2e-149	.
scaffold_682	550001	550100	chrUn	0.206687	2.25005	7	island	-3220	GSONMT00063640001	ASGL1_DANRE	Isoaspartyl peptidase/L-asparaginase	7e-155	.
scaffold_683	202901	203000	chrUn	1.2435	0.209573	1	open sea	.	.		.	.	.
scaffold_685	18901	19000	chrUn_16	0	5.53998	4	open sea	0	GSONMT00010419001	TMCC1_HUMAN	Transmembrane and coiled-coil domains protein 1	0	.
scaffold_686	173201	173300	chrUn_27	0.664978	1.64876	6	shelf	.	.		.	.	.
scaffold_686	331401	331500	chrUn_27	0.736318	2.19926	9	island	0	GSONMT00026616001	GT252_HUMAN	Procollagen galactosyltransferase 2	8e-154	.
scaffold_686	424701	424800	chrUn_27	0.61386	2.42882	11	island	-3528	GSONMT00026622001	NOTC2_HUMAN	Neurogenic locus notch homolog protein 2	0	.
scaffold_68641	1101	1200	chrUn	0.245098	0.501543	4	shore	.	.		.	.	.
scaffold_68883	1001	1100	chrUn	1.46225	2.5969	5	island	.	.		.	.	.
scaffold_6895	701	800	chrUn	0.558736	1.67532	4	open sea	.	.		.	.	.
scaffold_69157	601	700	chrUn	1.17527	3.65294	7	island	0	GSONMT00060264001	ZNRF1_DANRE	E3 ubiquitin-protein ligase znrf1	5e-66	.
scaffold_69157	701	800	chrUn	1.00379	3.52355	6	island	0	GSONMT00060264001	ZNRF1_DANRE	E3 ubiquitin-protein ligase znrf1	5e-66	.
scaffold_693	239601	239700	chrUn_5	0.440994	4.31526	3	open sea	.	.		.	.	.
scaffold_70	257601	257700	chrUn_17	1.26204	3.1622	9	island	.	.		.	.	.
scaffold_70	1199401	1199500	chrUn_17	0.283163	6.75438	6	island	.	.		.	.	.
scaffold_7008	18701	18800	chrUn	1.18737	0.7148	7	island	0	GSONMT00016749001	FZD4_CHICK	Frizzled-4	0	.
scaffold_701	133301	133400	chrUn_7	0.389878	0.448555	7	island	-3449	GSONMT00056209001		.	.	.
scaffold_7016	32401	32500	chrUn	0.20393	0.570723	5	island	.	.		.	.	.
scaffold_70584	201	300	chrUn	0.172422	2.88145	6	island	0	GSONMT00008517001	CC85A_HUMAN	Coiled-coil domain-containing protein 85A	4e-57	.
scaffold_70584	301	400	chrUn	0.314313	4.3002	7	island	0	GSONMT00008517001	CC85A_HUMAN	Coiled-coil domain-containing protein 85A	4e-57	.
scaffold_71072	201	300	chrUn	0	0	1	open sea	.	.		.	.	.
scaffold_712	305201	305300	chrUn_15	0.417354	1.16433	7	open sea	0	GSONMT00053537001	PACA_ONCNE	Glucagon family neuropeptides	6e-108	.
scaffold_718	298701	298800	chrUn_19	0.70245	4.84843	4	shore	0	GSONMT00053168001	INS1B_DANRE	Insulinoma-associated protein 1b	0	.
scaffold_7188	30501	30600	chrUn	0.377488	1.39527	6	open sea	.	.		.	.	.
scaffold_719	19601	19700	chrUn_23	0.748799	2.30573	7	island	.	.		.	.	.
scaffold_719	19701	19800	chrUn_23	1.8841	1.29774	7	shore	.	.		.	.	.
scaffold_72026	801	900	chrUn	0.515339	5.46591	11	island	.	.		.	.	.
scaffold_7271	22301	22400	chrUn	0.685903	0.574032	10	island	0	GSONMT00062709001	RB15B_MOUSE	Putative RNA-binding protein 15B	2e-160	.
scaffold_7271	22501	22600	chrUn	0.527544	0.15015	6	island	0	GSONMT00062709001	RB15B_MOUSE	Putative RNA-binding protein 15B	2e-160	.
scaffold_732	388501	388600	chrUn_14	0.821283	4.33147	9	shelf	.	.		.	.	.
scaffold_733	146901	147000	chrUn_9	0.513029	3.46744	7	shore	0	GSONMT00012581001	IRX1_MOUSE	Iroquois-class homeodomain protein IRX-1	6e-33	.
scaffold_733	147001	147100	chrUn_9	0.0736648	2.25965	5	island	0	GSONMT00012581001	IRX1_MOUSE	Iroquois-class homeodomain protein IRX-1	6e-33	.
scaffold_736	465201	465300	chrUn	0.676903	0.98813	7	island	-7351	GSONMT00014345001	TTBK1_HUMAN	Tau-tubulin kinase 1	1e-99	.
scaffold_73615	601	700	chrUn	1.91422	9.18791	11	island	0	GSONMT00061191001	NHRF2_RABIT	Na(+)/H(+) exchange regulatory cofactor NHE-RF2	8e-16	.
scaffold_7399	12201	12300	chrUn	0.189633	0.0607852	4	shore	-1020	GSONMT00001438001	B4GT3_BOVIN	Beta-1,4-galactosyltransferase 3	1e-153	.
scaffold_7399	12301	12400	chrUn	0.234504	0.128773	7	island	-1120	GSONMT00001438001	B4GT3_BOVIN	Beta-1,4-galactosyltransferase 3	1e-153	.
scaffold_74	1225801	1225900	chrUn_16	1.18869	0.144539	10	shelf	0	GSONMT00080970001	TM189_HUMAN	Transmembrane protein 189	1e-136	.
scaffold_74	1229001	1229100	chrUn_16	0.668851	0.0224618	8	shore	0	GSONMT00080971001	CEBPB_CHICK	CCAAT/enhancer-binding protein beta	1e-33	.
scaffold_740	474701	474800	chrUn_5	1.23122	0.325177	10	island	-3221	GSONMT00016009001	BCL7A_DANRE	B-cell CLL/lymphoma 7 protein family member A	8e-15	.
scaffold_7415	10801	10900	chrUn	0.584713	8.12664	9	island	0	GSONMT00002071001	WNT8A_DANRE	Protein Wnt-8a	0	.
scaffold_74363	1401	1500	chrUn	0.547019	2.96035	8	island	0	GSONMT00006482001		.	.	.
scaffold_74363	1501	1600	chrUn	0.520486	6.17296	9	island	0	GSONMT00006482001		.	.	.
scaffold_75	1415201	1415300	chrUn_17	3.54606	2.40704	10	island	0	GSONMT00081073001	MTMRE_HUMAN	Myotubularin-related protein 14	0	.
scaffold_750	272101	272200	chrUn_11	1.48418	2.30468	12	island	0	GSONMT00004283001	CLD5_HUMAN	Claudin-5	1e-66	.
scaffold_7544	20301	20400	chrUn	0.343013	2.19002	5	shore	0	GSONMT00045175001	SKR1B_DANRE	SKI family transcriptional corepressor 1 homolog-B	0	.
scaffold_7544	20701	20800	chrUn	1.43117	2.14025	8	island	0	GSONMT00045175001	SKR1B_DANRE	SKI family transcriptional corepressor 1 homolog-B	0	.
scaffold_7556	10201	10300	chrUn	0	0.252525	4	island	0	GSONMT00026273001	JUNB_CYPCA	Transcription factor jun-B	1e-168	.
scaffold_75693	901	1000	chrUn	0.350513	1.01288	5	island	.	.		.	.	.
scaffold_75693	1001	1100	chrUn	1.59019	3.47098	6	island	.	.		.	.	.
scaffold_757	156401	156500	chrUn_10	0.199913	0.36834	4	island	0	GSONMT00020822001	KCD16_HUMAN	BTB/POZ domain-containing protein KCTD16	4e-168	.
scaffold_757	493201	493300	chrUn_10	0.442671	1.88845	3	open sea	.	.		.	.	.
scaffold_757	493301	493400	chrUn_10	0.820169	3.15306	4	open sea	.	.		.	.	.
scaffold_757	493401	493500	chrUn_10	0.73833	0.158035	12	open sea	.	.		.	.	.
scaffold_7574	6101	6200	chrUn	0.0997937	1.75418	9	island	0	GSONMT00038241001	FAXC_RAT	Failed axon connections homolog	0	.
scaffold_7574	6201	6300	chrUn	0.514667	1.8211	7	island	0	GSONMT00038241001	FAXC_RAT	Failed axon connections homolog	0	.
scaffold_7598	1001	1100	chrUn	0.533567	2.30102	10	island	0	GSONMT00063809001	OLIG2_CHICK	Oligodendrocyte transcription factor 2	1e-65	.
scaffold_76	544501	544600	chrUn_12	0.402998	1.26318	7	island	.	.		.	.	.
scaffold_76	1183801	1183900	chrUn_12	1.13866	1.08604	5	shore	0	GSONMT00081172001	MAPK5_MOUSE	MAP kinase-activated protein kinase 5	0	.
scaffold_761	314901	315000	chrUn_27	0.2796	0.205436	4	shore	0	GSONMT00062637001	CRK_XENLA	Adapter molecule crk	4e-145	.
scaffold_763	4501	4600	chrUn_18	0.428149	1.32276	7	island	0	GSONMT00021710001	P3F3A_DANRE	POU domain, class 3, transcription factor 3-A	0	.
scaffold_763	4801	4900	chrUn_18	0.0933427	5.21031	6	shore	0	GSONMT00021710001	P3F3A_DANRE	POU domain, class 3, transcription factor 3-A	0	.
scaffold_763	318901	319000	chrUn_18	0.234354	1.50103	8	island	.	.		.	.	.
scaffold_76320	1101	1200	chrUn	0.372572	0.82579	11	island	0	GSONMT00045082001	SIK3_DANRE	Serine/threonine-protein kinase SIK3 homolog	2e-14	.
scaffold_764	221701	221800	chrUn_2	0.748663	0.302455	3	island	-31	GSONMT00031328001	FGF6_MOUSE	Fibroblast growth factor 6	2e-93	.
scaffold_7651	25401	25500	chrUn_5	3.86361	5.33915	7	island	0	GSONMT00056712001	MAFA_XENTR	Transcription factor MafA	6e-117	.
scaffold_7651	25601	25700	chrUn_5	0.443358	3.95301	9	island	0	GSONMT00056712001	MAFA_XENTR	Transcription factor MafA	6e-117	.
scaffold_767	110901	111000	chrUn	0.316093	0.654246	11	island	0	GSONMT00002460001	ATS1_RAT	A disintegrin and metalloproteinase with thrombospondin motifs 1	0	.
scaffold_767	148701	148800	chrUn	0.535214	0.287842	2	shore	0	GSONMT00002462001	ATS5_HUMAN	A disintegrin and metalloproteinase with thrombospondin motifs 5	0	.
scaffold_76708	401	500	chrUn	0.382243	0.218586	8	island	0	GSONMT00047146001	MAML3_HUMAN	Mastermind-like protein 3	5e-17	.
scaffold_76708	501	600	chrUn	0.736768	0.971629	7	island	0	GSONMT00047146001	MAML3_HUMAN	Mastermind-like protein 3	5e-17	.
scaffold_76708	1001	1100	chrUn	0.646357	0.11969	6	island	0	GSONMT00047146001	MAML3_HUMAN	Mastermind-like protein 3	5e-17	.
scaffold_76708	1501	1600	chrUn	0.389262	0.436271	5	island	0	GSONMT00047146001	MAML3_HUMAN	Mastermind-like protein 3	5e-17	.
scaffold_7683	10801	10900	chrUn	1.39807	1.92902	11	shore	.	.		.	.	.
scaffold_7721	16401	16500	chrUn	1.52237	1.25023	8	island	0	GSONMT00005728001	LHX2_MOUSE	LIM/homeobox protein Lhx2	0	.
scaffold_7729	29101	29200	chrUn	0.726293	2.87744	3	open sea	0	GSONMT00009121001	TM240_HUMAN	Transmembrane protein 240	2e-90	.
scaffold_7729	29201	29300	chrUn	0.17094	2.12742	12	open sea	0	GSONMT00009121001	TM240_HUMAN	Transmembrane protein 240	2e-90	.
scaffold_773	243101	243200	chrUn_6	0.385435	1.81312	8	island	0	GSONMT00057329001	XNIF_XENLA	Low molecular weight neuronal intermediate filament	1e-148	.
scaffold_7736	1901	2000	chrUn	0.569237	0.464735	8	island	.	.		.	.	.
scaffold_7737	201	300	chrUn	1.22429	0.618429	12	island	.	.		.	.	.
scaffold_7737	301	400	chrUn	0.859627	0.694376	10	island	.	.		.	.	.
scaffold_774	339701	339800	chrUn	0.37854	1.51005	6	island	0	GSONMT00032742001	SYT12_HUMAN	Synaptotagmin-12	3e-22	.
scaffold_7747	7301	7400	chrUn	0.63426	2.71222	9	island	0	GSONMT00038698001	KCD16_HUMAN	BTB/POZ domain-containing protein KCTD16	2e-114	.
scaffold_776	33601	33700	chr_20	0.123153	4.9092	9	island	0	GSONMT00027719001	FXJ1B_DANRE	Forkhead box protein J1-B	8e-175	.
scaffold_7781	21301	21400	chrUn	0.774334	1.26173	9	island	0	GSONMT00047816001	TMTC1_HUMAN	Transmembrane and TPR repeat-containing protein 1	1e-28	.
scaffold_7781	21401	21500	chrUn	0.22894	0.934671	10	island	0	GSONMT00047816001	TMTC1_HUMAN	Transmembrane and TPR repeat-containing protein 1	1e-28	.
scaffold_78	5401	5500	chrUn_1	0.364518	0.703191	8	island	0	GSONMT00081230001		.	.	.
scaffold_78	5501	5600	chrUn_1	0.745496	0.409383	8	island	0	GSONMT00081230001		.	.	.
scaffold_78	88401	88500	chrUn_1	0.971508	4.53024	6	shore	0	GSONMT00081236001	HXB6B_TAKRU	Homeobox protein Hox-B6b	4e-101	.
scaffold_78	1341401	1341500	chrUn_1	0.558983	0.659779	5	shore	0	GSONMT00081285001	JUN_SERCA	Transcription factor AP-1	3e-100	.
scaffold_7830	26501	26600	chrUn_27	0.79983	6.68495	5	island	0	GSONMT00062145001	PHX2A_MOUSE	Paired mesoderm homeobox protein 2A	1e-95	.
scaffold_7836	8701	8800	chrUn	3.27573	3.15212	5	shore	0	GSONMT00004499001	PDE3A_HUMAN	cGMP-inhibited 3',5'-cyclic phosphodiesterase A	2e-11	.
scaffold_7836	8801	8900	chrUn	1.23065	2.4181	9	island	0	GSONMT00004499001	PDE3A_HUMAN	cGMP-inhibited 3',5'-cyclic phosphodiesterase A	2e-11	.
scaffold_7836	9001	9100	chrUn	3.978	1.8571	6	shore	0	GSONMT00004499001	PDE3A_HUMAN	cGMP-inhibited 3',5'-cyclic phosphodiesterase A	2e-11	.
scaffold_78390	1301	1400	chrUn	0.104412	0.91133	8	island	.	.		.	.	.
scaffold_785	188201	188300	chrUn_3	1.39011	2.22353	6	island	-1079	GSONMT00056055001	GRT1A_DANRE	Growth hormone-regulated TBC protein 1-A	3e-83	.
scaffold_7859	16201	16300	chrUn	0	2.42379	5	shore	-224	GSONMT00034531001	PO4F1_HUMAN	POU domain, class 4, transcription factor 1	5e-104	.
scaffold_789	458101	458200	chrUn_3	0	0.474707	4	open sea	0	GSONMT00040517001	TRI35_HUMAN	Tripartite motif-containing protein 35	1e-23	.
scaffold_79	501501	501600	chrUn_2	1.01468	0.45166	6	island	0	GSONMT00081349001	GLT10_RAT	Polypeptide N-acetylgalactosaminyltransferase 10	5e-40	.
scaffold_791	419301	419400	chrUn_7	0.222317	0.621707	5	shelf	0	GSONMT00038342001	RNT2_DANRE	Ribonuclease T2	5e-97	.
scaffold_793	205801	205900	chrUn_4	1.51339	1.752	10	island	.	.		.	.	.
scaffold_793	205901	206000	chrUn_4	0.261142	1.04907	5	island	.	.		.	.	.
scaffold_7934	9801	9900	chrUn	0.807961	3.04035	9	shore	.	.		.	.	.
scaffold_794	261401	261500	chrUn_18	0.182207	0.192545	7	island	-6379	GSONMT00048683001	CD28_BOVIN	T-cell-specific surface glycoprotein CD28	3e-13	.
scaffold_79491	801	900	chrUn	0.341286	2.72845	4	open sea	.	.		.	.	.
scaffold_79501	1	100	chrUn	0.577863	0.325215	2	open sea	.	.		.	.	.
scaffold_7952	12501	12600	chrUn	1.54168	4.66265	9	island	0	GSONMT00019264001	SOX1A_DANRE	Transcription factor Sox-1a	8e-139	.
scaffold_7952	12601	12700	chrUn	0.448982	1.37135	7	island	0	GSONMT00019264001	SOX1A_DANRE	Transcription factor Sox-1a	8e-139	.
scaffold_79609	901	1000	chrUn	0.738507	1.81425	8	shore	.	.		.	.	.
scaffold_79675	1101	1200	chrUn	0.299223	0.571485	8	island	.	.		.	.	.
scaffold_79928	1800101	1800200	chrUn_11	2.57389	2.22356	3	open sea	-5760	GSONMT00066526001	RGS20_CHICK	Regulator of G-protein signaling 20	2e-78	.
scaffold_79932	45601	45700	chrUn_5	0.134158	0.801598	3	shore	0	GSONMT00067139001	GBX1_HUMAN	Homeobox protein GBX-1	2e-114	.
scaffold_801	153201	153300	chrUn_18	1.68503	7.15327	7	island	0	GSONMT00047722001	TYRO_ORYLA	Tyrosinase	0	.
scaffold_8039	7701	7800	chrUn	0.548671	0.758771	7	island	0	GSONMT00063593001	STXB_SYNHO	Stonustoxin subunit beta	1e-30	.
scaffold_8064	8001	8100	chrUn	0.795717	10.1428	8	island	0	GSONMT00047970001	TCF21_DANRE	Transcription factor 21	7e-73	.
scaffold_81	75301	75400	chrUn_22	0.216868	0.332062	3	open sea	4696	GSONMT00081590001	S38A3_RAT	Sodium-coupled neutral amino acid transporter 3	1e-93	.
scaffold_81	883901	884000	chrUn_22	0.817805	0.657755	4	island	0	GSONMT00081613001	BZW1A_DANRE	Basic leucine zipper and W2 domain-containing protein 1-A	0	.
scaffold_818	3101	3200	chrUn_Sex	2.23723	3.16294	5	island	.	.		.	.	.
scaffold_818	3201	3300	chrUn_Sex	1.14347	1.30653	8	island	.	.		.	.	.
scaffold_821	154801	154900	chrUn_7	0.493428	0.992478	12	island	0	GSONMT00004557001	EFCC1_MOUSE	EF-hand and coiled-coil domain-containing protein 1	9e-28	.
scaffold_821	154901	155000	chrUn_7	0.369694	0.861974	10	island	0	GSONMT00004557001	EFCC1_MOUSE	EF-hand and coiled-coil domain-containing protein 1	9e-28	.
scaffold_8215	16601	16700	chrUn	0.615608	2.37824	11	island	0	GSONMT00028936001	OLIG2_CHICK	Oligodendrocyte transcription factor 2	6e-67	.
scaffold_8215	16701	16800	chrUn	0.196078	0.928951	4	island	0	GSONMT00028936001	OLIG2_CHICK	Oligodendrocyte transcription factor 2	6e-67	.
scaffold_822	100801	100900	chrUn_9	0.944761	0.561052	6	shore	.	.		.	.	.
scaffold_827	461601	461700	chrUn	0.723978	0.151481	7	island	0	GSONMT00045946001	AXIN2_DANRE	Axin-2	5e-148	.
scaffold_832	175901	176000	chrUn_2	0	1.71247	8	shore	0	GSONMT00022881001	FJX1_XIPMA	Four-jointed box protein 1	0	.
scaffold_8323	21701	21800	chrUn	2.33893	8.8921	7	shore	.	.		.	.	.
scaffold_8411	23301	23400	chrUn	1.06882	2.60954	9	island	0	GSONMT00004234001	GATA2_XENLA	GATA-binding factor 2	7e-133	.
scaffold_843	363101	363200	chrUn	0.366903	0.21707	7	island	0	GSONMT00053272001	SOGA1_HUMAN	Protein SOGA1	5e-26	.
scaffold_843	363201	363300	chrUn	0.228686	0.26104	11	island	0	GSONMT00053272001	SOGA1_HUMAN	Protein SOGA1	5e-26	.
scaffold_851	405601	405700	chrUn_2	1.89698	1.27215	7	island	0	GSONMT00042940001		.	.	.
scaffold_853	166301	166400	chrUn_18	0.626073	3.07006	8	island	0	GSONMT00063771001	GLT15_HUMAN	Polypeptide N-acetylgalactosaminyltransferase 15	9e-172	.
scaffold_8538	9001	9100	chrUn	0.440156	3.01124	9	shore	0	GSONMT00041370001	ASB17_CANFA	Ankyrin repeat and SOCS box protein 17	3e-40	.
scaffold_857	209601	209700	chrUn_16	0.070028	1.62817	3	open sea	0	GSONMT00008840001	MYT1_MOUSE	Myelin transcription factor 1	0	.
scaffold_859	312301	312400	chrUn_21	1.40648	3.39639	9	island	-167	GSONMT00041440001		.	.	.
scaffold_859	312401	312500	chrUn_21	1.22514	2.59986	10	island	-67	GSONMT00041440001		.	.	.
scaffold_861	232001	232100	chrUn_4	0.951946	1.9935	7	island	0	GSONMT00041514001	MAFA_DANRE	Transcription factor MafA	3e-139	.
scaffold_861	232101	232200	chrUn_4	0.554787	3.72273	7	island	0	GSONMT00041514001	MAFA_DANRE	Transcription factor MafA	3e-139	.
scaffold_861	232301	232400	chrUn_4	1.26788	5.5948	7	island	0	GSONMT00041514001	MAFA_DANRE	Transcription factor MafA	3e-139	.
scaffold_861	234801	234900	chrUn_4	1.05134	4.56991	13	island	-2030	GSONMT00041514001	MAFA_DANRE	Transcription factor MafA	3e-139	.
scaffold_8615	13701	13800	chrUn	1.6155	2.19489	6	island	-82	GSONMT00000907001	CERS2_HUMAN	Ceramide synthase 2	3e-73	.
scaffold_8672	20501	20600	chrUn_5	2.12712	1.43751	8	island	0	GSONMT00049560001	TPRN_MOUSE	Taperin	2e-11	.
scaffold_87	82401	82500	chrUn_7	0.191211	2.09884	7	island	0	GSONMT00081939001	FEZF2_DANRE	Fez family zinc finger protein 2	0	.
scaffold_870	215301	215400	chrUn_14	0.566962	6.45496	7	island	0	GSONMT00057553001	PCDC2_HUMAN	Protocadherin alpha-C2	0	.
scaffold_870	215401	215500	chrUn_14	0.442779	9.32734	8	island	0	GSONMT00057553001	PCDC2_HUMAN	Protocadherin alpha-C2	0	.
scaffold_870	440501	440600	chrUn_14	1.04348	1.00158	6	island	0	GSONMT00057564001	PCDGM_HUMAN	Protocadherin gamma-C5	0	.
scaffold_873	178201	178300	chrUn_4	0.0441501	0.0773994	5	open sea	0	GSONMT00061886001	SRBP2_DANRE	Sterol regulatory element-binding protein 2	1e-15	.
scaffold_8733	22801	22900	chrUn	0.444406	2.19379	3	island	0	GSONMT00033896001	NOT2_XENLA	Homeobox protein not2	2e-30	.
scaffold_876	172801	172900	chrUn_18	0.299093	0.697734	6	island	0	GSONMT00000222001	FPRP_MOUSE	Prostaglandin F2 receptor negative regulator	2e-56	.
scaffold_8770	14201	14300	chrUn	0.246638	0.147059	5	shelf	0	GSONMT00022537001	ZBT49_HUMAN	Zinc finger and BTB domain-containing protein 49	6e-17	.
scaffold_8817	4601	4700	chrUn	0.311594	0.226131	7	open sea	-1190	GSONMT00048001001	TTC8_MOUSE	Tetratricopeptide repeat protein 8	0	.
scaffold_882	102901	103000	chrUn_4	1.05758	0.290762	5	shore	0	GSONMT00047537001	CAPS2_MOUSE	Calcium-dependent secretion activator 2	0	.
scaffold_883	209001	209100	chrUn_23	2.15536	2.15719	8	shore	0	GSONMT00031854001	MALD1_DANRE	MARVEL domain-containing protein 1	7e-57	.
scaffold_8848	18701	18800	chrUn	0.350052	1.49724	2	shore	.	.		.	.	.
scaffold_891	8101	8200	chrUn_3	1.72896	0.928187	11	island	.	.		.	.	ID=RM2060082;Name=RM2060082;Note=Motif:DNA2-5_DR
scaffold_897	262701	262800	chrUn	0.145494	0.924921	6	shore	5202	GSONMT00055058001	RN126_MOUSE	E3 ubiquitin-protein ligase RNF126	1e-144	.
scaffold_899	413001	413100	chrUn	2.23792	0.141737	4	open sea	0	GSONMT00008124001	FA63B_HUMAN	Protein FAM63B	0	.
scaffold_9	1204701	1204800	chrUn_11	0.651477	3.5983	5	island	0	GSONMT00082169001	HME2A_DANRE	Homeobox protein engrailed-2a	4e-100	.
scaffold_9	1204801	1204900	chrUn_11	0.907612	2.75321	6	island	0	GSONMT00082169001	HME2A_DANRE	Homeobox protein engrailed-2a	4e-100	.
scaffold_9	2403601	2403700	chrUn_11	0.596093	2.31305	7	island	0	GSONMT00082201001	LYM4B_SALSA	LYR motif-containing protein 4B	3e-43	.
scaffold_90	132101	132200	chr_1	0	1.30396	5	shore	0	GSONMT00082217001	CTTB2_RHIFE	Cortactin-binding protein 2	1e-166	.
scaffold_900	244801	244900	chrUn_26	0.0992063	0.396825	7	open sea	0	GSONMT00005624001	KI13A_MOUSE	Kinesin-like protein KIF13A	2e-15	.
scaffold_900	244901	245000	chrUn_26	0.620683	0.0784314	5	open sea	0	GSONMT00005624001	KI13A_MOUSE	Kinesin-like protein KIF13A	2e-15	.
scaffold_906	294301	294400	chrUn_29	0.0156863	0.431932	8	island	0	GSONMT00058078001	ROA0_MOUSE	Heterogeneous nuclear ribonucleoprotein A0	5e-76	.
scaffold_906	294401	294500	chrUn_29	0.755365	0.512988	6	island	0	GSONMT00058078001	ROA0_MOUSE	Heterogeneous nuclear ribonucleoprotein A0	5e-76	.
scaffold_9077	20301	20400	chrUn	0.220603	3.75691	7	island	0	GSONMT00045367001	IRX5_MOUSE	Iroquois-class homeodomain protein IRX-5	2e-154	.
scaffold_9077	20501	20600	chrUn	0.722327	4.36757	5	island	0	GSONMT00045367001	IRX5_MOUSE	Iroquois-class homeodomain protein IRX-5	2e-154	.
scaffold_91	936901	937000	chrUn_21	0.0736377	0.636786	5	island	0	GSONMT00082311001	B3GLT_HUMAN	Beta-1,3-glucosyltransferase	6e-132	.
scaffold_91	937001	937100	chrUn_21	0.532559	0.611611	4	island	0	GSONMT00082311001	B3GLT_HUMAN	Beta-1,3-glucosyltransferase	6e-132	.
scaffold_91	1269801	1269900	chrUn_21	0.772444	4.19285	9	island	0	GSONMT00082317001	PDE3A_HUMAN	cGMP-inhibited 3',5'-cyclic phosphodiesterase A	2e-28	.
scaffold_91	1269901	1270000	chrUn_21	1.43031	3.1076	6	island	0	GSONMT00082317001	PDE3A_HUMAN	cGMP-inhibited 3',5'-cyclic phosphodiesterase A	2e-28	.
scaffold_913	361901	362000	chrUn_29	0.181548	2.33122	4	island	0	GSONMT00031756001	FOXA2_ORYLA	Hepatocyte nuclear factor 3-beta	0	.
scaffold_913	362201	362300	chrUn_29	0.450967	4.43969	6	island	0	GSONMT00031756001	FOXA2_ORYLA	Hepatocyte nuclear factor 3-beta	0	.
scaffold_916	214401	214500	chrUn_12	0.660564	0.305352	10	shore	0	GSONMT00015311001	NHRF1_RABIT	Na(+)/H(+) exchange regulatory cofactor NHE-RF1	4e-92	.
scaffold_9163	1801	1900	chrUn	0.556568	10.4581	8	island	.	.		.	.	.
scaffold_920	262401	262500	chrUn	0.110794	0.909631	6	open sea	.	.		.	.	.
scaffold_924	248001	248100	chrUn_29	0.961079	1.83971	6	island	0	GSONMT00050857001	SOX3_DANRE	Transcription factor Sox-3	6e-157	.
scaffold_924	248201	248300	chrUn_29	0.799552	4.71455	8	island	0	GSONMT00050857001	SOX3_DANRE	Transcription factor Sox-3	6e-157	.
scaffold_9254	12901	13000	chrUn	0.115836	0.202915	9	island	0	GSONMT00005655001	HMBX1_HUMAN	Homeobox-containing protein 1	1e-10	.
scaffold_9300	5501	5600	chrUn	0.65162	5.92149	3	island	.	.		.	.	.
scaffold_9300	5601	5700	chrUn	0.0238095	1.01086	8	shore	.	.		.	.	.
scaffold_931	63801	63900	chrUn_29	0.813965	0.49152	6	shore	-28	GSONMT00003836001	ADT2_RAT	ADP/ATP translocase 2	0	.
scaffold_934	26601	26700	chrUn_12	0.523895	2.77704	12	island	8117	GSONMT00017783001	TBB4B_RAT	Tubulin beta-4B chain	6e-134	.
scaffold_934	26701	26800	chrUn_12	1.33358	2.94009	10	island	8217	GSONMT00017783001	TBB4B_RAT	Tubulin beta-4B chain	6e-134	.
scaffold_936	311601	311700	chrUn_9	0.234123	1.12615	8	island	-5889	GSONMT00014594001	XPC_MOUSE	DNA repair protein complementing XP-C cells homolog	3e-73	.
scaffold_9373	14301	14400	chrUn	1.06631	1.25304	8	island	.	.		.	.	.
scaffold_9373	14401	14500	chrUn	0.370431	1.00236	8	island	.	.		.	.	.
scaffold_9406	2001	2100	chrUn	1.06821	2.18087	6	island	0	GSONMT00013078001	NOE1_CHICK	Noelin	3e-142	.
scaffold_945	393901	394000	chrUn	0.769711	4.60382	13	island	.	.		.	.	.
scaffold_945	394001	394100	chrUn	0.358227	1.09466	6	island	.	.		.	.	.
scaffold_95	6701	6800	chr_1	0.470456	0.237679	6	open sea	0	GSONMT00082508001	ZRAN1_MOUSE	Ubiquitin thioesterase Zranb1	0	.
scaffold_950	58501	58600	chrUn_14	0.417565	0.975487	12	island	0	GSONMT00022087001	MAML1_HUMAN	Mastermind-like protein 1	3e-44	.
scaffold_950	58601	58700	chrUn_14	1.97213	2.89573	5	island	0	GSONMT00022087001	MAML1_HUMAN	Mastermind-like protein 1	3e-44	.
scaffold_953	90901	91000	chrUn_21	0.368447	5.58963	11	shore	0	GSONMT00020191001	TISB_RAT	Zinc finger protein 36, C3H1 type-like 1	6e-27	.
scaffold_953	93601	93700	chrUn_21	0.279873	1.123	5	island	0	GSONMT00020191001	TISB_RAT	Zinc finger protein 36, C3H1 type-like 1	6e-27	.
scaffold_955	49301	49400	chrUn_29	0.411614	0.227307	6	shore	0	GSONMT00000003001	ARF6_CHICK	ADP-ribosylation factor 6	9e-128	.
scaffold_9593	6901	7000	chrUn	1.02665	0.490745	6	island	-5733	GSONMT00031712001	OTU6B_DANRE	OTU domain-containing protein 6B	2e-14	.
scaffold_9593	7001	7100	chrUn	0.462894	0.665729	10	island	-5833	GSONMT00031712001	OTU6B_DANRE	OTU domain-containing protein 6B	2e-14	.
scaffold_96	140601	140700	chrUn_4	0.635708	0.132256	7	island	-993	GSONMT00082575001	A1A1B_DANRE	Alcohol dehydrogenase	0	.
scaffold_96	140701	140800	chrUn_4	0.632716	2.19202	7	island	-893	GSONMT00082575001	A1A1B_DANRE	Alcohol dehydrogenase	0	.
scaffold_9605	14101	14200	chrUn	0.265957	0.319866	6	island	.	.		.	.	.
scaffold_961	302201	302300	chr_1	0.471807	0.294492	6	shore	-1294	GSONMT00033229001	MPPD2_MOUSE	Metallophosphoesterase MPPED2	5e-117	.
scaffold_961	302301	302400	chr_1	0.0793651	0.27345	4	shore	-1194	GSONMT00033229001	MPPD2_MOUSE	Metallophosphoesterase MPPED2	5e-117	.
scaffold_964	400601	400700	chrUn	1.93861	3.41497	9	open sea	0	GSONMT00019093001	PPRC1_MOUSE	Peroxisome proliferator-activated receptor gamma coactivator-related protein 1	2e-53	.
scaffold_964	400701	400800	chrUn	0.81486	1.28364	7	open sea	0	GSONMT00019093001	PPRC1_MOUSE	Peroxisome proliferator-activated receptor gamma coactivator-related protein 1	2e-53	.
scaffold_967	150801	150900	chrUn_17	0.266784	0.734752	11	island	0	GSONMT00003193001	WNK2_MOUSE	Serine/threonine-protein kinase WNK2	0	.
scaffold_967	151001	151100	chrUn_17	1.26838	2.14376	9	island	0	GSONMT00003193001	WNK2_MOUSE	Serine/threonine-protein kinase WNK2	0	.
scaffold_969	103901	104000	chrUn	0.0411523	7.83921	5	shelf	0	GSONMT00026233001	ZAR1_TAKRU	Zygote arrest protein 1	2e-81	.
scaffold_972	159801	159900	chrUn_27	1.44377	0.861449	8	island	0	GSONMT00018525001	RNPL1_HUMAN	Arginyl aminopeptidase-like 1	2e-115	.
scaffold_972	370201	370300	chrUn_27	0.420331	0.358613	8	open sea	-7469	GSONMT00018534001	ABCF3_HUMAN	ATP-binding cassette sub-family F member 3	0	.
scaffold_979	53101	53200	chr_3	0.336413	0.502017	5	island	0	GSONMT00040638001	POPD1_DANRE	Blood vessel epicardial substance	0	.
scaffold_98	314901	315000	chrUn_12	1.2068	8.54112	4	island	.	.		.	.	.
scaffold_9866	21001	21100	chrUn	0.798049	0.97539	8	island	.	.		.	.	.
scaffold_989	29701	29800	chrUn_5	0.0529101	0.412307	5	island	0	GSONMT00006155001	GNDS_HUMAN	Ral guanine nucleotide dissociation stimulator	3e-80	.
scaffold_99	994501	994600	chrUn_5	0.516097	0.177821	6	island	-1093	GSONMT00082782001	PPTC7_HUMAN	Protein phosphatase PTC7 homolog	1e-153	.
scaffold_9973	11801	11900	chrUn	0.246305	1.02201	7	island	1861	GSONMT00058662001	PRDX1_MYOLU	Peroxiredoxin-1	6e-121	.
scaffold_999	328701	328800	chrUn	0.764904	0.800805	9	island	.	.		.	.	.
scaffold_999	328801	328900	chrUn	0.516493	0.884605	7	island	.	.		.	.	.

## Sheet: S5.5 origin-specific DMRs RBCs
scaffold	start	stop	Chr	pvalue	qvalue	meth.diff	CG_in_tile	island_annot	dist to closest gene	O.my gene ID	UniProt ID	UniProt Full Name	E-value	Repeat Description
scaffold_1009	101601	101700	chrUn	7.56164e-07	3.13659e-05	-22.3408	4	shore	.	.	.	.	.	ID=RM590311;.me=RM590311;Note=Motif:Gypsy70-I_DR-int
scaffold_1032	163101	163200	chrUn	1.75383e-20	5.29888e-18	-48.2855	5	island	0	GSONMT00053870001	.	.	.	.
scaffold_1069	61901	62000	chr_11	1.45012e-24	5.78326e-22	28.6245	6	shelf	.	.	.	.	.	.
scaffold_1105	300001	300100	chrUn_2	1.04936e-09	8.49356e-08	20.7643	6	shelf	.	.	.	.	.	.
scaffold_1138	104001	104100	chrUn	1.45838e-15	2.69724e-13	21.3725	3	shore	.	.	.	.	.	ID=RM663863;.me=RM663863;Note=Motif:Gypsy-35_GA-I-int
scaffold_1162	264601	264700	chrUn_10	3.46321e-47	4.08412e-44	-21.9493	3	shore	1663	GSONMT00035074001	T120A_DANRE	Transmembrane protein 120A	8e-176	.
scaffold_1265	187101	187200	chrUn	7.59856e-08	4.17307e-06	-21.2895	9	shore	0	GSONMT00020375001	VINC_MOUSE	Vinculin	0	ID=RM730108;.me=RM730108;Note=Motif:REX1-1_AFC
scaffold_1278	274201	274300	chrUn	1.6773e-36	1.27747e-33	28.4118	6	open sea	1633	GSONMT00057749001	MYZAP_XENTR	Myocardial zonula adherens protein	3e-30	.
scaffold_1442	172201	172300	chrUn_18	5.27858e-88	1.52348e-84	20.5824	4	open sea	0	GSONMT00041551001	MANEL_DANRE	Glycoprotein endo-alpha-1,2-mannosidase-like protein	0	.
scaffold_1478	59201	59300	chrUn_19	2.88535e-10	2.57274e-08	33.0233	2	open sea	.	.	.	.	.	.
scaffold_15252	1601	1700	chrUn	2.39658e-41	2.26588e-38	21.9948	6	open sea	-4413	GSONMT00013362001	CTNA2_XENLA	Catenin alpha-2	1e-29	ID=RM846781;.me=RM846781;Note=Motif:TC1DR3
scaffold_1800	54701	54800	chrUn_10	3.46458e-33	2.34552e-30	-20.3644	3	open sea	0	GSONMT00041940001	OSBP1_RABIT	Oxysterol-binding protein 1	0	.
scaffold_189	1040801	1040900	chrUn_23	5.03033e-18	1.23528e-15	-25.1242	7	open sea	-3860	GSONMT00070190001	DLG5_HUMAN	Disks large homolog 5	0	.
scaffold_1974	56801	56900	chrUn	1.53306e-17	3.60036e-15	-20.4202	4	shore	.	.	.	.	.	.
scaffold_200	1045001	1045100	chrUn_1	6.90127e-11	6.91854e-09	-23.3916	5	open sea	-3656	GSONMT00071070001	PRR5_MOUSE	Proline-rich protein 5	2e-106	.
scaffold_201	298501	298600	chrUn_6	1.27616e-10	1.22237e-08	21.4911	5	shelf	0	GSONMT00071095001	CD276_HUMAN	CD276 antigen	4e-84	ID=RM1015789;.me=RM1015789;Note=Motif:REX1-1_AFC
scaffold_2040	113101	113200	chrUn_Sex	0.000610615	0.00756103	-21.1005	8	open sea	0	GSONMT00012781001	NRG2_MOUSE	Pro-neuregulin-2, membrane-bound isoform	2e-73	.
scaffold_2065	1001	1100	chrUn_11	1.05808e-08	7.08444e-07	31.8828	1	open sea	7325	GSONMT00039267001	VAV3_MOUSE	Guanine nucleotide exchange factor VAV3	2e-61	ID=RM1030789;.me=RM1030789;Note=Motif:TC1_FR3
scaffold_2073	78701	78800	chrUn	2.64729e-30	1.5201e-27	-25.2367	6	shore	1251	GSONMT00044088001	RTJK_DROME	RNA-directed DNA polymerase from mobile element jockey	6e-20	.
scaffold_2097	74301	74400	chrUn	4.53018e-15	7.91149e-13	-32.8151	6	shore	0	GSONMT00019014001	C1RA_MOUSE	Complement C1r-A subcomponent	1e-25	.
scaffold_2097	74401	74500	chrUn	2.04101e-41	1.94648e-38	-22.4055	4	island	0	GSONMT00019014001	C1RA_MOUSE	Complement C1r-A subcomponent	1e-25	.
scaffold_2136	53801	53900	chrUn	3.82521e-19	1.03331e-16	-28.2133	3	open sea	.	.	.	.	.	ID=RM1051135;.me=RM1051135;Note=Motif:Gypsy-3_GA-I-int
scaffold_2193	21601	21700	chrUn	1.08344e-43	1.09014e-40	-25.4486	5	island	2048	GSONMT00049198001	TFB2M_HUMAN	Dimethyladenosine transferase 2, mitochondrial	2e-47	.
scaffold_2215	34201	34300	chrUn	2.34821e-10	2.12841e-08	-26.5092	4	island	0	GSONMT00002299001	ASB11_BOVIN	Ankyrin repeat and SOCS box protein 11	2e-90	.
scaffold_257	929401	929500	chrUn_12	3.64143e-20	1.05097e-17	29.3968	1	open sea	0	GSONMT00074449001	NUP88_HUMAN	Nuclear pore complex protein Nup88	0	ID=RM1163170;.me=RM1163170;Note=Motif:REX1-1_AFC
scaffold_2777	65501	65600	chrUn_5	1.01343e-14	1.70471e-12	20.5167	5	island	.	.	.	.	.	ID=RM1209305;.me=RM1209305;Note=Motif:Ronin2_I-int
scaffold_282	39301	39400	chrUn_17	1.4896e-05	0.000395091	21.5599	2	open sea	0	GSONMT00075836001	SMBT1_HUMAN	Scm-like with four MBT domains protein 1	3e-169	.
scaffold_317	855801	855900	chrUn_3	6.41785e-15	1.0998e-12	28.0454	2	island	-5590	GSONMT00011069001	.	.	.	.
scaffold_317	855901	856000	chrUn_3	1.47443e-36	1.13081e-33	31.7489	4	island	-5490	GSONMT00011069001	.	.	.	.
scaffold_3174	59101	59200	chrUn_8	2.0758e-13	2.96434e-11	20.8571	7	island	7582	GSONMT00002870001	C560_PIG	Succinate dehydrogenase cytochrome b560 subunit, mitochondrial	4e-33	.
scaffold_33481	2301	2400	chrUn	1.14426e-20	3.50545e-18	20.9519	3	open sea	.	.	.	.	.	.
scaffold_34	121601	121700	chrUn_14	1.5402e-05	0.00040635	28.2812	6	shore	7072	GSONMT00077320001	SLIT3_HUMAN	Slit homolog 3 protein	7e-66	.
scaffold_34797	1201	1300	chrUn	8.3742e-07	3.42999e-05	-23.7384	7	island	.	.	.	.	.	.
scaffold_35	1687101	1687200	chrUn_23	4.53384e-09	3.22885e-07	-27.1701	5	open sea	.	.	.	.	.	ID=RM1359463;.me=RM1359463;Note=Motif:Ronin2_I-int
scaffold_35	2202801	2202900	chrUn_23	3.53096e-13	4.88956e-11	20.529	9	island	.	.	.	.	.	.
scaffold_37	390801	390900	chrUn_10	3.32353e-13	4.61397e-11	-22.4377	1	shore	.	.	.	.	.	ID=RM1395215;.me=RM1395215;Note=Motif:CR1-24_DR
scaffold_373	221301	221400	chrUn_28	0.000126226	0.00224044	23.8779	5	shore	-311	GSONMT00058341001	CLD18_MOUSE	Claudin-18	9e-48	.
scaffold_376	125101	125200	chrUn_14	3.61693e-06	0.000120719	-30.788	2	open sea	.	.	.	.	.	.
scaffold_3801	56001	56100	chrUn	1.61995e-07	8.1573e-06	-21.0051	2	open sea	.	.	.	.	.	.
scaffold_38279	2501	2600	chrUn	1.97706e-34	1.37235e-31	-28.0366	1	shore	.	.	.	.	.	ID=RM1418730;.me=RM1418730;Note=Motif:REX1-1_AFC
scaffold_3882	31301	31400	chrUn	3.92295e-77	9.56099e-74	-29.7141	6	shore	.	.	.	.	.	.
scaffold_38828	2701	2800	chrUn	6.17129e-08	3.47091e-06	21.2812	5	open sea	.	.	.	.	.	.
scaffold_39	1937801	1937900	chrUn_1	7.08229e-10	5.9248e-08	20.1107	3	shore	.	.	.	.	.	.
scaffold_395	19401	19500	chrUn_8	4.20247e-27	2.01266e-24	-24.7352	4	open sea	0	GSONMT00024669001	PSA7_CARAU	Proteasome subunit alpha type-7	6e-165	.
scaffold_395	402901	403000	chrUn_8	2.78493e-41	2.61055e-38	-24.4016	2	open sea	.	.	.	.	.	.
scaffold_4	2611001	2611100	chr_8	1.72707e-19	4.78319e-17	-37.2441	3	open sea	5998	GSONMT00077855001	RGS1_RAT	Regulator of G-protein signaling 1	7e-19	.
scaffold_40794	1701	1800	chrUn	1.41728e-50	1.82869e-47	-31.6476	5	island	.	.	.	.	.	.
scaffold_4366	28401	28500	chrUn	1.33228e-11	1.48643e-09	-24.5754	6	shelf	-8728	GSONMT00040482001	UBA5_CHICK	Ubiquitin-like modifier-activating enzyme 5	0	.
scaffold_4366	28501	28600	chrUn	1.33715e-16	2.85312e-14	-21.815	4	shelf	-8628	GSONMT00040482001	UBA5_CHICK	Ubiquitin-like modifier-activating enzyme 5	0	.
scaffold_4397	46901	47000	chrUn	3.81968e-11	3.97079e-09	29.4718	7	island	-848	GSONMT00005525001	PIN4_DANRE	Peptidyl-prolyl cis-trans isomerase NIMA-interacting 4	2e-62	.
scaffold_4397	47001	47100	chrUn	1.43629e-88	4.37566e-85	26.3569	6	island	-948	GSONMT00005525001	PIN4_DANRE	Peptidyl-prolyl cis-trans isomerase NIMA-interacting 4	2e-62	.
scaffold_4582	33001	33100	chrUn	2.39842e-38	2.02341e-35	25.0747	5	island	.	.	.	.	.	.
scaffold_4582	33101	33200	chrUn	6.10189e-50	7.69215e-47	21.5767	5	island	.	.	.	.	.	.
scaffold_47467	901	1000	chrUn	1.85611e-11	2.02554e-09	21.1911	6	open sea	.	.	.	.	.	ID=RM1573355;.me=RM1573355;Note=Motif:CR1-40_DR
scaffold_47675	2001	2100	chrUn	4.29458e-09	3.08046e-07	29.3755	3	open sea	.	.	.	.	.	.
scaffold_47675	2101	2200	chrUn	1.74358e-07	8.71184e-06	30.8835	6	open sea	.	.	.	.	.	.
scaffold_487	570201	570300	chrUn_9	0.000167692	0.00280443	25.1545	5	open sea	.	.	.	.	.	ID=RM1591735;.me=RM1591735;Note=Motif:REX1-1_AFC
scaffold_49	2047401	2047500	chrUn_10	1.01104e-15	1.93179e-13	21.3373	7	open sea	6979	GSONMT00078843001	ZO20_XENLA	Oocyte zinc finger protein XlCOF20, partial	2e-32	.
scaffold_5	1842201	1842300	chrUn_11	9.02735e-21	2.78891e-18	26.961	1	open sea	.	.	.	.	.	.
scaffold_50	2067201	2067300	chrUn_27	1.11863e-27	5.45262e-25	21.7573	7	island	0	GSONMT00079131001	ABH15_HUMAN	Abhydrolase domain-containing protein 15	4e-52	.
scaffold_5109	41401	41500	chrUn	5.23495e-09	3.68272e-07	-21.6218	5	open sea	.	.	.	.	.	ID=RM1629884;.me=RM1629884;Note=Motif:TC1_TF
scaffold_52	1327101	1327200	chrUn_9	2.31726e-31	1.4041e-28	-21.1447	7	open sea	0	GSONMT00079228001	MIB2_CHICK	E3 ubiquitin-protein ligase MIB2	0	.
scaffold_55479	801	900	chrUn	3.59464e-06	0.000120121	20.2391	3	open sea	.	.	.	.	.	.
scaffold_56467	1401	1500	chrUn	1.02287e-08	6.86503e-07	-22.3298	6	open sea	.	.	.	.	.	ID=RM1706388;.me=RM1706388;Note=Motif:CR1-40_DR
scaffold_587	536901	537000	chrUn	8.23667e-28	4.0328e-25	24.6552	5	open sea	-3983	GSONMT00059162001	ZKSC1_RAT	Zinc finger protein with KRAB and SCAN domains 1	6e-31	.
scaffold_588	202801	202900	chr_17	5.53436e-20	1.57247e-17	-21.1874	3	open sea	.	.	.	.	.	ID=RM1737191;.me=RM1737191;Note=Motif:CR1-40_DR
scaffold_594	150101	150200	chrUn_8	1.81344e-08	1.15969e-06	25.4058	2	shelf	0	GSONMT00017765001	CB044_DANRE	WD repeat-containing protein C2orf44 homolog	0	.
scaffold_594	602301	602400	chrUn_8	1.66234e-09	1.30786e-07	21.2727	3	open sea	0	GSONMT00017778001	GCP60_RAT	Golgi resident protein GCP60	1e-73	ID=RM1746154;.me=RM1746154;Note=Motif:CR1-40_DR
scaffold_669	50001	50100	chrUn_4	1.34521e-08	8.81854e-07	20.5211	4	shore	5163	GSONMT00023304001	REM2_HUMAN	GTP-binding protein REM 2	1e-51	.
scaffold_69	383401	383500	chr_4	5.06276e-08	2.91013e-06	23.6249	2	open sea	0	GSONMT00080562001	SZT2_HUMAN	Protein SZT2	0	.
scaffold_6924	26501	26600	chrUn	8.21293e-18	1.98402e-15	-28.5406	5	open sea	.	.	.	.	.	.
scaffold_6924	26601	26700	chrUn	9.81661e-17	2.13616e-14	-23.0886	4	open sea	.	.	.	.	.	.
scaffold_707	70101	70200	chr_7	1.6067e-21	5.32364e-19	-37.5234	3	open sea	-3829	GSONMT00060652001	PPARD_HUMAN	Peroxisome proliferator-activated receptor delta	0	ID=RM1889041;.me=RM1889041;Note=Motif:CR1-40_DR
scaffold_74	954301	954400	chrUn_16	9.64396e-17	2.10276e-14	-26.4147	1	open sea	0	GSONMT00080952001	PAN2_CHICK	PAB-dependent poly	0	ID=RM1926465;.me=RM1926465;Note=Motif:HPAI
scaffold_740	25801	25900	chrUn_5	2.58036e-06	9.07045e-05	20.9753	1	open sea	0	GSONMT00015979001	KCRS_BOVIN	Creatine kinase S-type, mitochondrial	0	.
scaffold_7517	3401	3500	chrUn	1.23081e-12	1.59372e-10	20.1393	2	shore	.	.	.	.	.	ID=RM1939822;.me=RM1939822;Note=Motif:Gypsy-20_GA-I-int
scaffold_79934	827501	827600	chrUn_3	3.1864e-09	2.36604e-07	-30.4397	5	open sea	0	GSONMT00070239001	TEFF2_HUMAN	Tomoregulin-2	2e-102	ID=RM977068;.me=RM977068;Note=Motif:ENSPM-6_DR
scaffold_79941	165601	165700	chrUn_20	4.05217e-07	1.82587e-05	24.4874	6	island	.	.	.	.	.	.
scaffold_8182	8501	8600	chrUn	9.13844e-14	1.36732e-11	-23.2416	2	shore	.	.	.	.	.	.
scaffold_8188	26101	26200	chrUn	3.44528e-24	1.33518e-21	20.3111	2	open sea	0	GSONMT00007765001	BCAS3_HUMAN	Breast carcinoma-amplified sequence 3	4e-78	.
scaffold_86	988401	988500	chrUn_19	4.45213e-15	7.80002e-13	28.0521	1	open sea	-6012	GSONMT00081909001	ISM2_DANRE	Isthmin-2	1e-121	.
scaffold_868	180501	180600	chrUn_Sex	1.86441e-10	1.72264e-08	-22.2763	3	open sea	.	.	.	.	.	.
scaffold_870	293801	293900	chrUn_14	2.96569e-14	4.69348e-12	20.0507	5	island	.	.	.	.	.	.
scaffold_939	335301	335400	chrUn_26	4.92717e-24	1.89607e-21	23.5242	1	open sea	0	GSONMT00036871001	STRC_HUMAN	Stereocilin	0	.
scaffold_98	918101	918200	chrUn_12	9.16087e-10	7.49222e-08	24.6322	2	open sea	0	GSONMT00082694001	GBRA1_HUMAN	Gamma-aminobutyric acid receptor subunit alpha-1	3e-18	ID=RM2120122;.me=RM2120122;Note=Motif:CR1-40_DR

## Sheet: S5.6 origin-specific DMRs sperm
scaffold	start	stop	Chr	pvalue	qvalue	meth.diff	CG_in_tile	island_annot	dist to closest gene	O.my gene ID	UniProt ID	UniProt Full Name	E-value	Repeat Description
scaffold_1009	101601	101700	chrUn	3.66238e-18	3.19426e-16	-28.405	4	shore	.	.	.	.	.	ID=RM590311;Name=RM590311;Note=Motif:Gypsy70-I_DR-int
scaffold_1013	229401	229500	chrUn_13	1.51595e-20	1.56429e-18	25.9099	6	open sea	0	GSONMT00029231001	ZNF91_HUMAN	Zinc finger protein 91	3e-114	.
scaffold_1013	229501	229600	chrUn_13	1.23941e-20	1.28994e-18	29.2228	4	open sea	0	GSONMT00029231001	ZNF91_HUMAN	Zinc finger protein 91	3e-114	.
scaffold_123	1226601	1226700	chrUn_16	3.61509e-25	5.00866e-23	39.2724	6	islands	.	.	.	.	.	.
scaffold_123	1226701	1226800	chrUn_16	3.54488e-33	7.48629e-31	27.6138	2	islands	.	.	.	.	.	.
scaffold_1278	274101	274200	chrUn	4.81097e-25	6.60663e-23	20.2775	6	open sea	1533	GSONMT00057749001	MYZAP_XENTR	Myocardial zonula adherens protein	3e-30	.
scaffold_1278	274201	274300	chrUn	3.90869e-12	1.93585e-10	29.1305	6	open sea	1633	GSONMT00057749001	MYZAP_XENTR	Myocardial zonula adherens protein	3e-30	.
scaffold_1303	84901	85000	chrUn_5	1.34156e-158	3.47403e-155	20.7625	8	shore	-2406	GSONMT00014843001	K1045_MOUSE	Protein KIAA1045	5e-97	.
scaffold_1303	85001	85100	chrUn_5	1.02122e-101	1.52149e-98	47.7368	7	islands	-2306	GSONMT00014843001	K1045_MOUSE	Protein KIAA1045	5e-97	.
scaffold_13324	5601	5700	chrUn	7.52879e-161	2.04709e-157	-29.5415	6	islands	0	GSONMT00035234001	RHES_RAT	GTP-binding protein Rhes	3e-62	.
scaffold_1372	177101	177200	chrUn_2	4.19084e-18	3.63476e-16	-20.8837	5	islands	.	.	.	.	.	.
scaffold_1442	172301	172400	chrUn_18	5.74373e-92	6.86476e-89	21.8334	9	open sea	0	GSONMT00041551001	MANEL_DANRE	Glycoprotein endo-alpha-1,2-mannosidase-like protein	0	.
scaffold_14674	11501	11600	chrUn	1.40121e-26	2.08762e-24	40.7005	5	open sea	.	.	.	.	.	.
scaffold_14940	6501	6600	chrUn	9.13057e-12	4.30077e-10	21.8231	9	islands	.	.	.	.	.	.
scaffold_15252	1601	1700	chrUn	7.05351e-51	3.10585e-48	25.704	6	open sea	-4413	GSONMT00013362001	CTNA2_XENLA	Catenin alpha-2	1e-29	.
scaffold_155	241001	241100	chrUn_8	5.66702e-20	5.6185e-18	-26.9725	7	shore	0	GSONMT00068093001	KCNF1_MOUSE	Potassium voltage-gated channel subfamily F member 1	0	.
scaffold_16	1999001	1999100	chrUn_12	4.00267e-62	2.51638e-59	-33.9773	5	shore	0	GSONMT00068409001	PCDGM_HUMAN	Protocadherin gamma-C5	4e-132	.
scaffold_17367	1301	1400	chrUn	1.73389e-94	2.14294e-91	-28.6937	4	open sea	.	.	.	.	.	.
scaffold_17490	6701	6800	chrUn	3.35845e-16	2.50871e-14	-23.1233	6	islands	.	.	.	.	.	.
scaffold_17490	6801	6900	chrUn	1.10983e-98	1.54751e-95	-23.5411	9	islands	.	.	.	.	.	.
scaffold_1800	54701	54800	chrUn_10	3.64821e-11	1.59158e-09	-21.3232	3	open sea	0	GSONMT00041940001	OSBP1_RABIT	Oxysterol-binding protein 1	0	.
scaffold_1820	93301	93400	chrUn	1.87513e-51	8.46228e-49	37.0753	10	islands	0	GSONMT00026056001	D19L3_MOUSE	Probable C-mannosyltransferase DPY19L3	5e-173	.
scaffold_189	1040801	1040900	chrUn_23	9.24902e-49	3.79597e-46	-25.7692	7	open sea	-3860	GSONMT00070190001	DLG5_HUMAN	Disks large homolog 5	0	.
scaffold_192	829801	829900	chrUn_13	1.38475e-14	8.8801e-13	29.9872	5	shore	7102	GSONMT00070406001	GALR2_HUMAN	Galanin receptor type 2	6e-143	.
scaffold_192	829901	830000	chrUn_13	2.0901e-31	3.9881e-29	29.5233	3	shore	7202	GSONMT00070406001	GALR2_HUMAN	Galanin receptor type 2	6e-143	.
scaffold_1958	2901	3000	chrUn	1.50902e-91	1.76475e-88	24.3753	12	open sea	-7072	GSONMT00054452001	PXN1_XENLA	Pentraxin fusion protein	9e-19	.
scaffold_205	95101	95200	chrUn_13	2.1289e-26	3.13742e-24	-21.6441	6	shore	.	.	.	.	.	.
scaffold_2050	90201	90300	chrUn_20	3.33998e-06	6.59751e-05	24.3639	7	shore	.	.	.	.	.	.
scaffold_2097	74401	74500	chrUn	3.67641e-98	4.99811e-95	-42.4294	4	shore	0	GSONMT00019014001	C1RA_MOUSE	Complement C1r-A subcomponent	1e-25	.
scaffold_20993	6301	6400	chrUn	1.19582e-16	9.26772e-15	33.2543	9	open sea	.	.	.	.	.	.
scaffold_2215	34201	34300	chrUn	3.01054e-27	4.65098e-25	-39.1597	4	islands	0	GSONMT00002299001	ASB11_BOVIN	Ankyrin repeat and SOCS box protein 11	2e-90	.
scaffold_229	1038401	1038500	chrUn_15	1.75416e-12	9.05906e-11	-25.9458	1	open sea	.	.	.	.	.	ID=RM1092283;Name=RM1092283;Note=Motif:CR1-12_DR
scaffold_237	840701	840800	chrUn_11	1.09661e-52	5.11879e-50	32.692	7	islands	.	.	.	.	.	.
scaffold_2394	24001	24100	chrUn_18	3.30611e-61	2.01588e-58	22.3191	3	open sea	.	.	.	.	.	ID=RM1119300;Name=RM1119300;Note=Motif:TZF28/TZF28C
scaffold_245	94101	94200	chr_6	4.24053e-19	3.98965e-17	20.7519	9	shore	-2535	GSONMT00073584001	GCN1L_HUMAN	Translational activator GCN1	2e-138	.
scaffold_245	94201	94300	chr_6	5.96009e-10	2.2026e-08	20.8339	6	islands	-2635	GSONMT00073584001	GCN1L_HUMAN	Translational activator GCN1	2e-138	.
scaffold_25	1092801	1092900	chrUn_19	2.14425e-32	4.33477e-30	-21.6617	3	open sea	.	.	.	.	.	.
scaffold_2554	14001	14100	chrUn	1.2749e-07	3.29983e-06	20.0385	1	open sea	.	.	.	.	.	.
scaffold_2610	83201	83300	chrUn	2.1885e-23	2.77093e-21	30.7871	9	islands	1821	GSONMT00034756001	VTCN1_RAT	V-set domain-containing T-cell activation inhibitor 1	8e-24	.
scaffold_277	17401	17500	chrUn_5	1.41427e-90	1.61913e-87	20.7511	9	islands	.	.	.	.	.	.
scaffold_292	898201	898300	chrUn_1	6.31011e-33	1.30972e-30	41.0014	8	shore	0	GSONMT00076361001	NEUT_BOVIN	Neurotensin/neuromedin N	2e-14	.
scaffold_3	2233001	2233100	chr_19	2.27034e-05	0.000368929	-21.22	4	shelf	6639	GSONMT00076652001	JAG2_HUMAN	Protein jagged-2	0	.
scaffold_3039	36501	36600	chrUn	5.53788e-44	1.8881e-41	24.4129	5	open sea	0	GSONMT00050603001	PLD5_MOUSE	Inactive phospholipase D5	5e-145	.
scaffold_3174	59101	59200	chrUn_8	2.28517e-30	4.08106e-28	24.6384	7	islands	7582	GSONMT00002870001	C560_PIG	Succinate dehydrogenase cytochrome b560 subunit, mitochondrial	4e-33	.
scaffold_322	570601	570700	chrUn_27	2.18462e-05	0.000356543	-21.0731	7	shore	-833	GSONMT00028457001	HIP1_HUMAN	Huntingtin-interacting protein 1	0	.
scaffold_323	213401	213500	chrUn_14	8.17185e-25	1.11515e-22	21.2755	3	shore	-7877	GSONMT00031164001	IGDC3_MOUSE	Immunoglobulin superfamily DCC subclass member 3	3e-91	.
scaffold_34	571101	571200	chrUn_14	4.80306e-87	5.12142e-84	33.8841	8	islands	2750	GSONMT00077336001	.	.	.	.
scaffold_3415	56001	56100	chrUn	4.81414e-33	1.0069e-30	-22.1226	10	islands	0	GSONMT00009983001	FXJ1B_DANRE	Forkhead box protein J1-B	1e-145	.
scaffold_34200	1201	1300	chrUn	1.54605e-49	6.4673e-47	62.4896	5	shelf	.	.	.	.	.	.
scaffold_35	619101	619200	chrUn_23	2.34603e-54	1.17584e-51	27.1132	5	islands	.	.	.	.	.	ID=RM1358663;Name=RM1358663;Note=Motif:Gypsy3-I_DR-int
scaffold_35	1687101	1687200	chrUn_23	4.07138e-19	3.83714e-17	-24.8727	5	open sea	.	.	.	.	.	ID=RM1359463;Name=RM1359463;Note=Motif:Ronin2_I-int
scaffold_35	2202701	2202800	chrUn_23	9.36343e-26	1.33821e-23	33.3809	6	islands	.	.	.	.	.	.
scaffold_35	2202801	2202900	chrUn_23	5.14279e-31	9.44822e-29	25.4832	9	islands	.	.	.	.	.	.
scaffold_3530	15401	15500	chrUn	2.0087e-14	1.26942e-12	20.7349	5	islands	.	.	.	.	.	.
scaffold_3541	45101	45200	chrUn_5	5.60444e-24	7.27379e-22	22.0741	5	shore	1058	GSONMT00040006001	TCB1_CAEBR	Transposable element Tcb1 transposase	1e-29	.
scaffold_38279	2501	2600	chrUn	1.29516e-80	1.23564e-77	-43.0656	1	open sea	.	.	.	.	.	ID=RM1418730;Name=RM1418730;Note=Motif:REX1-1_AFC
scaffold_3882	31301	31400	chrUn	4.05352e-95	5.0674e-92	-22.8809	6	open sea	.	.	.	.	.	.
scaffold_390	454101	454200	chrUn_18	2.09104e-43	6.91256e-41	22.6406	2	shore	.	.	.	.	.	ID=RM1432171;Name=RM1432171;Note=Motif:Gypsy-35_GA-I-intLTR_DR
scaffold_395	402901	403000	chrUn_8	2.76261e-70	2.10114e-67	-26.6616	2	open sea	.	.	.	.	.	.
scaffold_4	1761601	1761700	chr_8	0.000638454	0.00642178	22.1471	4	shore	0	GSONMT00077825001	SEC62_PONAB	Translocation protein SEC62	2e-44
scaffold_421	292001	292100	chrUn	9.94672e-13	5.28764e-11	20.1406	8	islands	.	.	.	.	.	ID=RM1488398;Name=RM1488398;Note=Motif:DNA-N4_DR
scaffold_4211	19201	19300	chrUn	4.76491e-09	1.553e-07	22.3228	5	islands	0	GSONMT00060130001	MCL1B_DANRE	Protein L-Myc-1b	2e-141	.
scaffold_4211	19301	19400	chrUn	2.10497e-21	2.31485e-19	25.6804	5	islands	0	GSONMT00060130001	MCL1B_DANRE	Protein L-Myc-1b	2e-141	.
scaffold_4216	44701	44800	chrUn	4.96819e-83	4.8245e-80	26.1792	8	open sea	-4664	GSONMT00019449001	FCL_CRIGR	GDP-L-fucose synthase	4e-154	.
scaffold_4366	28501	28600	chrUn	9.24439e-25	1.25836e-22	-22.648	4	shelf	-8628	GSONMT00056097001	UBA5_CHICK	Ubiquitin-like modifier-activating enzyme 5	0	.
scaffold_4397	46901	47000	chrUn	2.18218e-21	2.39732e-19	45.5048	7	islands	-848	GSONMT00005525001	PIN4_DANRE	Peptidyl-prolyl cis-trans isomerase NIMA-interacting 4	2e-62	.
scaffold_4397	47001	47100	chrUn	3.44728e-60	1.98375e-57	27.0267	6	islands	-948	GSONMT00005525001	PIN4_DANRE	Peptidyl-prolyl cis-trans isomerase NIMA-interacting 4	2e-62	.
scaffold_441	100601	100700	chrUn	1.45691e-227	7.2025e-224	-20.4638	9	islands	-2531	GSONMT00050876001	ENPL_CHICK	Endoplasmin	2e-98	.
scaffold_441	616001	616100	chrUn	5.3443e-51	2.38218e-48	31.0845	4	open sea	-4940	GSONMT00050891001	AMRA1_HUMAN	Activating molecule in BECN1-regulated autophagy protein 1	0	.
scaffold_44821	2801	2900	chrUn	4.52603e-32	8.96639e-30	50.7315	5	open sea	.	.	.	.	.	.
scaffold_478	227101	227200	chrUn_7	6.57649e-32	1.29343e-29	-24.0487	7	shore	.	.	.	.	.	.
scaffold_478	227801	227900	chrUn_7	3.72286e-06	7.2824e-05	-21.5073	11	islands	.	.	.	.	.	.
scaffold_478	640601	640700	chrUn_7	5.04231e-05	0.0007436	-24.2796	3	open sea	.	.	.	.	.	.
scaffold_49	2047501	2047600	chrUn_10	1.30726e-49	5.51079e-47	26.5577	7	open sea	6879	GSONMT00078843001	ZO20_XENLA	Oocyte zinc finger protein XlCOF20, partial	2e-32	.
scaffold_50	834601	834700	chrUn_27	9.82771e-10	3.52995e-08	-23.6351	2	open sea	0	GSONMT00079071001	DNHD1_HUMAN	Dynein heavy chain domain-containing protein 1	3e-44	.
scaffold_51	306001	306100	chrUn_15	2.43087e-53	1.15451e-50	20.5084	11	shelf	2968	GSONMT00079143001	TMX3_XENLA	Protein disulfide-isomerase TMX3	0	.
scaffold_514	164401	164500	chrUn_Sex	9.52033e-24	1.22392e-21	21.5556	8	islands	.	.	.	.	.	ID=RM1634074;Name=RM1634074;Note=Motif:CR1-40_DR
scaffold_51705	1	100	chrUn	3.65129e-21	3.94356e-19	-20.614	7	open sea	.	.	.	.	.	.
scaffold_5179	20201	20300	chrUn_12	1.19193e-85	1.22298e-82	22.724	9	islands	.	.	.	.	.	.
scaffold_56467	1501	1600	chrUn	5.60251e-143	1.32464e-139	-35.7215	7	open sea	.	.	.	.	.	ID=RM1706388;Name=RM1706388;Note=Motif:CR1-40_DR
scaffold_5848	21801	21900	chrUn	2.47126e-66	1.71195e-63	20.5134	5	islands	0	GSONMT00036298001	F120C_MOUSE	Constitutive coactivator of PPAR-gamma-like protein 2	6e-89	.
scaffold_588	202801	202900	chr_17	2.18052e-16	1.65843e-14	-27.4526	3	open sea	.	.	.	.	.	ID=RM1737191;Name=RM1737191;Note=Motif:CR1-40_DR
scaffold_589	82901	83000	chrUn	2.51287e-14	1.56351e-12	36.4525	4	shelf	.	.	.	.	.	.
scaffold_61	1572701	1572800	chrUn_16	8.90944e-05	0.00122009	21.7009	3	open sea	7794	GSONMT00079989001	HXC4_ORYLA	Homeobox protein Hox-C4	3e-141	.
scaffold_63944	901	1000	chrUn	0.000333129	0.00374716	22.6295	7	open sea	.	.	.	.	.	ID=RM1806045;Name=RM1806045;Note=Motif:Gypsy-29_GA-I-int
scaffold_6412	16001	16100	chrUn	3.041e-10	1.17035e-08	-22.6875	8	open sea	5083	GSONMT00032266001	.	.	.	ID=RM1809900;Name=RM1809900;Note=Motif:U2
scaffold_668	246301	246400	chrUn	2.42808e-47	9.46524e-45	-20.1321	4	shore	.	.	.	.	.	.
scaffold_6924	26601	26700	chrUn	1.14115e-05	0.000199633	-38.2414	4	open sea	.	.	.	.	.	.
scaffold_700	251601	251700	chrUn_5	8.18277e-23	1.00108e-20	25.7151	4	open sea	0	GSONMT00018964001	GPX4_PIG	Phospholipid hydroperoxide glutathione peroxidase, mitochondrial	7e-41	.
scaffold_707	70101	70200	chr_7	3.41334e-15	2.31878e-13	-30.0355	3	open sea	-3829	GSONMT00060652001	PPARD_HUMAN	Peroxisome proliferator-activated receptor delta	0	.
scaffold_710	13401	13500	chrUn_4	1.0188e-99	1.43903e-96	-37.3366	7	shelf	.	.	.	.	.	.
scaffold_710	13501	13600	chrUn_4	3.38361e-06	6.674e-05	-22.1187	4	shelf	.	.	.	.	.	.
scaffold_7112	28701	28800	chrUn	9.6995e-41	2.91416e-38	-30.1564	4	open sea	.	.	.	.	.	ID=RM1895000;Name=RM1895000;Note=Motif:Gypsy-35_GA-I-int
scaffold_7159	22401	22500	chrUn_20	6.91341e-27	1.04722e-24	-30.7391	6	islands	5929	GSONMT00051985001	S39AB_MOUSE	Zinc transporter ZIP11	2e-55	.
scaffold_724	499401	499500	chrUn_20	4.80018e-09	1.56309e-07	-24.5579	8	islands	0	GSONMT00056097001	P4HA1_CHICK	Prolyl 4-hydroxylase subunit alpha-1	.	.
scaffold_74	965501	965600	chrUn_16	3.73124e-52	1.7051e-49	27.6081	5	open sea	7451	GSONMT00080952001	PAN2_CHICK	PAB-dependent poly(A)-specific ribonuclease subunit PAN2	0	.
scaffold_77843	901	1000	chrUn	5.86327e-70	4.42843e-67	22.8179	11	islands	.	.	.	.	.	.
scaffold_77843	1001	1100	chrUn	1.64118e-28	2.70449e-26	21.3343	6	islands	.	.	.	.	.	.
scaffold_79930	562501	562600	chrUn_28	3.8936e-32	7.75587e-30	20.9743	7	islands	6709	GSONMT00067109001	CCD13_HUMAN	Coiled-coil domain-containing protein 13	1e-147	.
scaffold_82	1232101	1232200	chrUn_2	1.40693e-35	3.3121e-33	28.3906	6	open sea	0	GSONMT00081685001	MYO9A_MOUSE	Unconventional myosin-IXa	0	.
scaffold_822	175401	175500	chrUn_9	8.46306e-13	4.52531e-11	28.8833	1	open sea	-9856	GSONMT00022166001	TRI39_HUMAN	E3 ubiquitin-protein ligase TRIM39	5e-26	.
scaffold_859	125001	125100	chrUn_21	2.68745e-38	7.18154e-36	35.3692	8	open sea	0	GSONMT00041426001	NAMPT_PIG	Nicotinamide phosphoribosyltransferase	0	.
scaffold_8892	16601	16700	chrUn	9.70483e-34	2.09842e-31	-24.9736	4	shelf	0	GSONMT00038578001	.	.	.	.
scaffold_9030	17501	17600	chrUn	3.36359e-19	3.19221e-17	26.0419	6	open sea	0	GSONMT00004604001	B915_XENLA	Maternal B9.15 protein	1e-36	.
scaffold_96	1009101	1009200	chrUn_4	3.70763e-73	3.03192e-70	23.7646	5	islands	6358	GSONMT00082601001	WDR78_HUMAN	WD repeat-containing protein 78	2e-13	.
scaffold_96	1009201	1009300	chrUn_4	3.86988e-39	1.0737e-36	30.3712	4	islands	6458	GSONMT00082601001	WDR78_HUMAN	WD repeat-containing protein 78	2e-13	.
scaffold_9752	401	500	chrUn	7.40269e-12	3.53745e-10	-24.2902	1	open sea	.	.	.	.	.	ID=RM2117282;Name=RM2117282;Note=Motif:CR1-40_DR
scaffold_98	918101	918200	chrUn_12	0.000293013	0.00335562	23.6992	2	open sea	0	GSONMT00082694001	GBRA1_HUMAN	Gamma-aminobutyric acid receptor subunit alpha-1	3e-18	.

## Sheet: S5.7 origin-specific DMRscommon
scaffold	start	stop	Chr	pvalue (sperm)	qvalue (sperm)	meth diff (sperm)	pvalue (RBC)	qvalue (RBC)	meth diff (RBC)	CG_in_tile	island_annot	dist to closest gene	O.my gene ID	UniProt ID	UniProt Full Name	E-value	Repeat Description
scaffold_1009	101601	101700	chrUn	3.66238e-18	3.19426e-16	-28.405	7.56164e-07	3.13659e-05	-22.3408	4	shore	.	.	.	.	.	ID=RM590311;.me=RM590311;Note=Motif:Gypsy70-I_DR-int
scaffold_1278	274201	274300	chrUn	3.90869e-12	1.93585e-10	29.1305	1.6773e-36	1.27747e-33	28.4118	6	open sea	1633	GSONMT00057749001	MYZAP_XENTR	Myocardial zonula adherens protein	3e-30	.
scaffold_15252	1601	1700	chrUn	7.05351e-51	3.10585e-48	25.704	2.39658e-41	2.26588e-38	21.9948	6	open sea	-4413	GSONMT00013362001	CTNA2_XENLA	Catenin alpha-2	1e-29	ID=RM846781;.me=RM846781;Note=Motif:TC1DR3
scaffold_1800	54701	54800	chrUn_10	3.64821e-11	1.59158e-09	-21.3232	3.46458e-33	2.34552e-30	-20.3644	3	open sea	0	GSONMT00041940001	OSBP1_RABIT	Oxysterol-binding protein 1	0	.
scaffold_189	1040801	1040900	chrUn_23	9.24902e-49	3.79597e-46	-25.7692	5.03033e-18	1.23528e-15	-25.1242	7	open sea	-3860	GSONMT00070190001	DLG5_HUMAN	Disks large homolog 5	0	.
scaffold_2097	74401	74500	chrUn	3.67641e-98	4.99811e-95	-42.4294	2.04101e-41	1.94648e-38	-22.4055	4	island	0	GSONMT00019014001	C1RA_MOUSE	Complement C1r-A subcomponent	1e-25	.
scaffold_2215	34201	34300	chrUn	3.01054e-27	4.65098e-25	-39.1597	2.34821e-10	2.12841e-08	-26.5092	4	island	0	GSONMT00002299001	ASB11_BOVIN	Ankyrin repeat and SOCS box protein 11	2e-90	.
scaffold_3174	59101	59200	chrUn_8	2.28517e-30	4.08106e-28	24.6384	2.0758e-13	2.96434e-11	20.8571	7	island	7582	GSONMT00002870001	C560_PIG	Succinate dehydrogenase cytochrome b560 subunit, mitochondrial	4e-33	.
scaffold_35	1687101	1687200	chrUn_23	4.07138e-19	3.83714e-17	-24.8727	4.53384e-09	3.22885e-07	-27.1701	5	open sea	.	.	.	.	.	ID=RM1359463;.me=RM1359463;Note=Motif:Ronin2_I-int
scaffold_35	2202801	2202900	chrUn_23	5.14279e-31	9.44822e-29	25.4832	3.53096e-13	4.88956e-11	20.529	9	island	.	.	.	.	.	.
scaffold_38279	2501	2600	chrUn	1.29516e-80	1.23564e-77	-43.0656	1.97706e-34	1.37235e-31	-28.0366	1	shore	.	.	.	.	.	ID=RM1418730;.me=RM1418730;Note=Motif:REX1-1_AFC
scaffold_3882	31301	31400	chrUn	4.05352e-95	5.0674e-92	-22.8809	3.92295e-77	9.56099e-74	-29.7141	6	shore	.	.	.	.	.	.
scaffold_395	402901	403000	chrUn_8	2.76261e-70	2.10114e-67	-26.6616	2.78493e-41	2.61055e-38	-24.4016	2	open sea	.	.	.	.	.	.
scaffold_4366	28501	28600	chrUn	9.24439e-25	1.25836e-22	-22.648	1.33715e-16	2.85312e-14	-21.815	4	shelf	-8628	GSONMT00040482001	UBA5_CHICK	Ubiquitin-like modifier-activating enzyme 5	0	.
scaffold_4397	46901	47000	chrUn	2.18218e-21	2.39732e-19	45.5048	3.81968e-11	3.97079e-09	29.4718	7	island	-848	GSONMT00005525001	PIN4_DANRE	Peptidyl-prolyl cis-trans isomerase NIMA-interacting 4	2e-62	.
scaffold_4397	47001	47100	chrUn	3.44728e-60	1.98375e-57	27.0267	1.43629e-88	4.37566e-85	26.3569	6	island	-948	GSONMT00005525001	PIN4_DANRE	Peptidyl-prolyl cis-trans isomerase NIMA-interacting 4	2e-62	.
scaffold_588	202801	202900	chr_17	2.18052e-16	1.65843e-14	-27.4526	5.53436e-20	1.57247e-17	-21.1874	3	open sea	.	.	.	.	.	ID=RM1737191;.me=RM1737191;Note=Motif:CR1-40_DR
scaffold_6924	26601	26700	chrUn	1.14115e-05	0.000199633	-38.2414	9.81661e-17	2.13616e-14	-23.0886	4	open sea	.	.	.	.	.	.
scaffold_707	70101	70200	chr_7	3.41334e-15	2.31878e-13	-30.0355	1.6067e-21	5.32364e-19	-37.5234	3	open sea	-3829	GSONMT00060652001	PPARD_HUMAN	Peroxisome proliferator-activated receptor delta	0	ID=RM1889041;.me=RM1889041;Note=Motif:CR1-40_DR
scaffold_98	918101	918200	chrUn_12	0.000293013	0.00335562	23.6992	9.16087e-10	7.49222e-08	24.6322	2	open sea	0	GSONMT00082694001	GBRA1_HUMAN	Gamma-aminobutyric acid receptor subunit alpha-1	3e-18	ID=RM2120122;.me=RM2120122;Note=Motif:CR1-40_DR
